# Supplementary material for: Monkeypox Virus and Vaccinia Vaccines: Genomic and Antigenic Differences Relevant to Outbreaks and Vaccinology
Source: Preprints.org preprint supplement (doi:10.20944/preprints202410.2082.v1), 2024-10-28
Supplement: Supplementary file 1 [file supplementary]

A

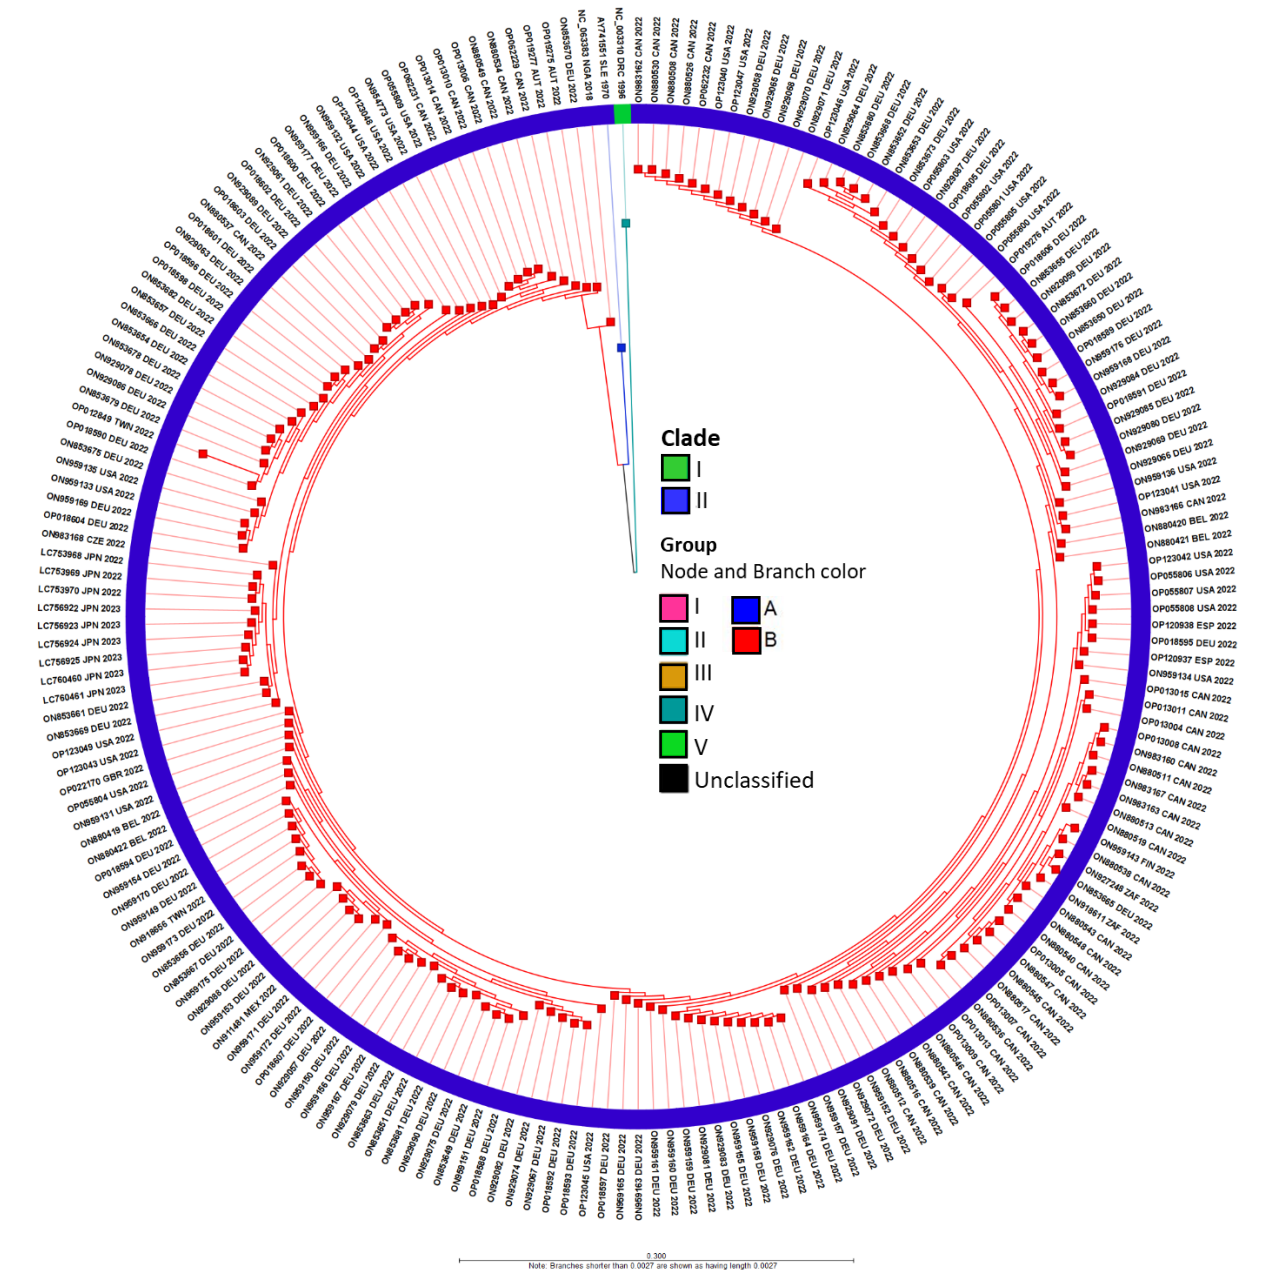

B

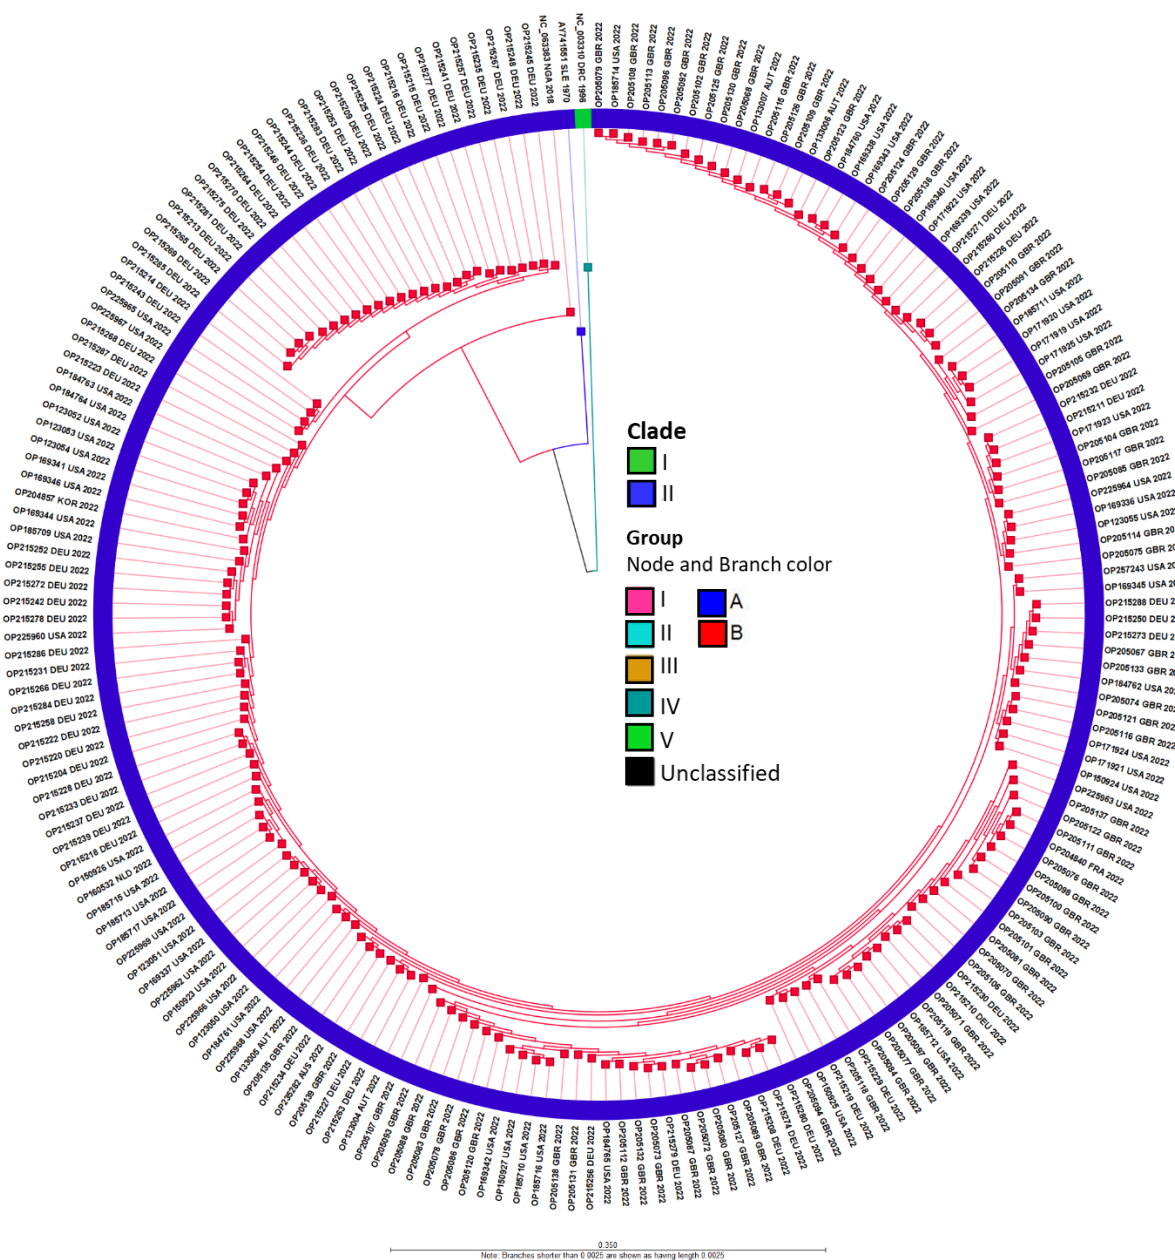

C

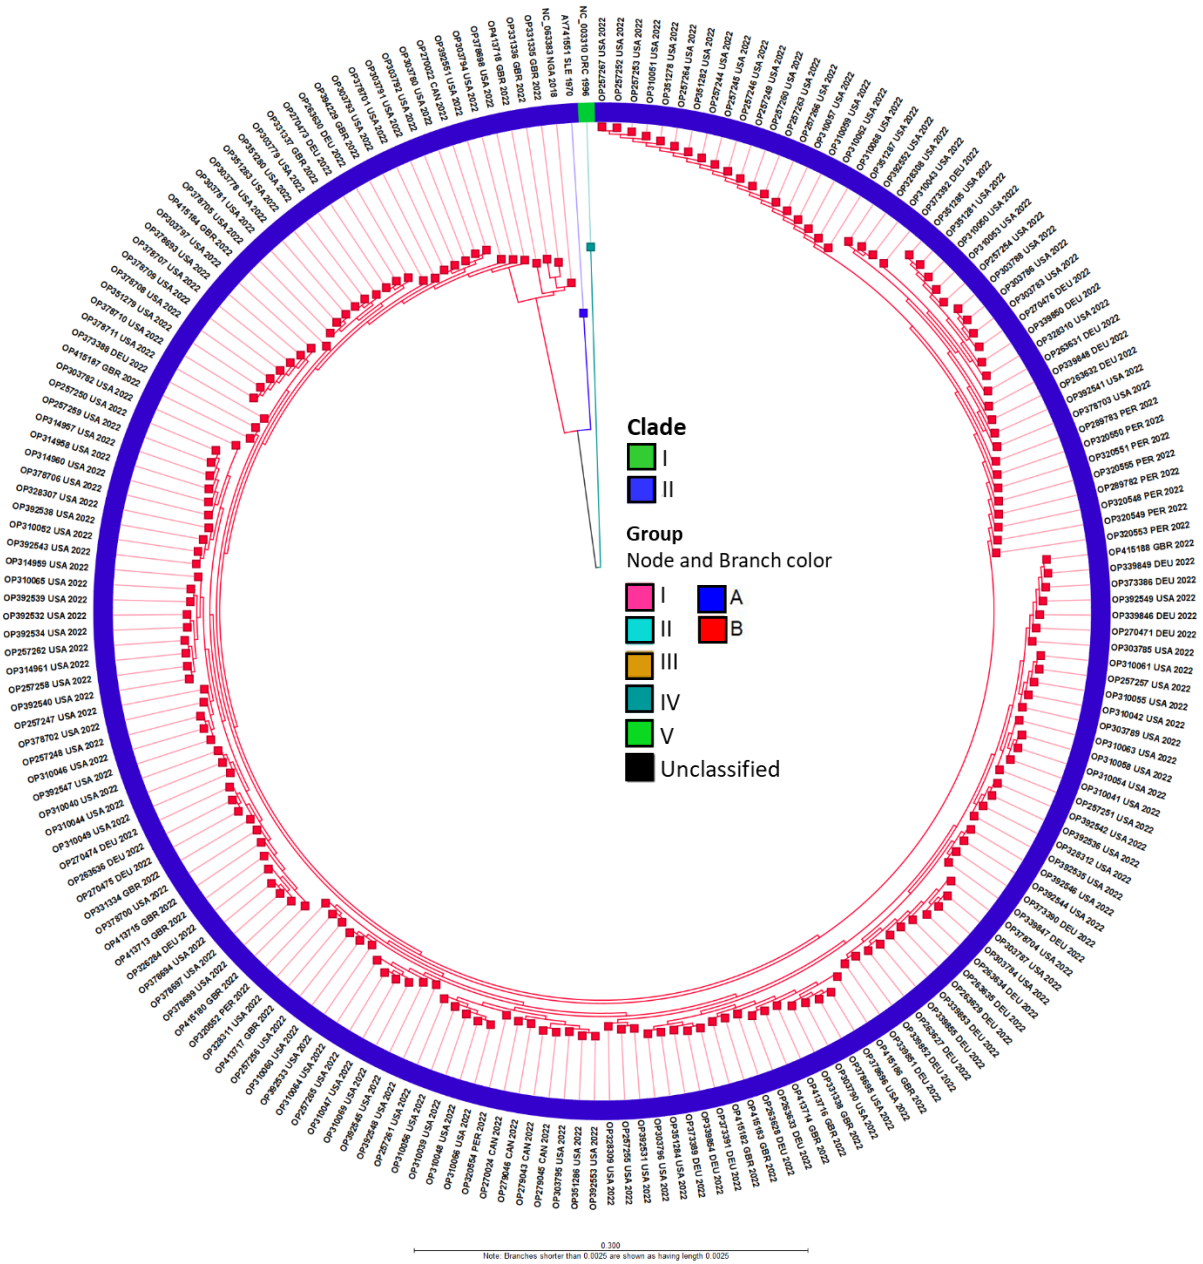

D

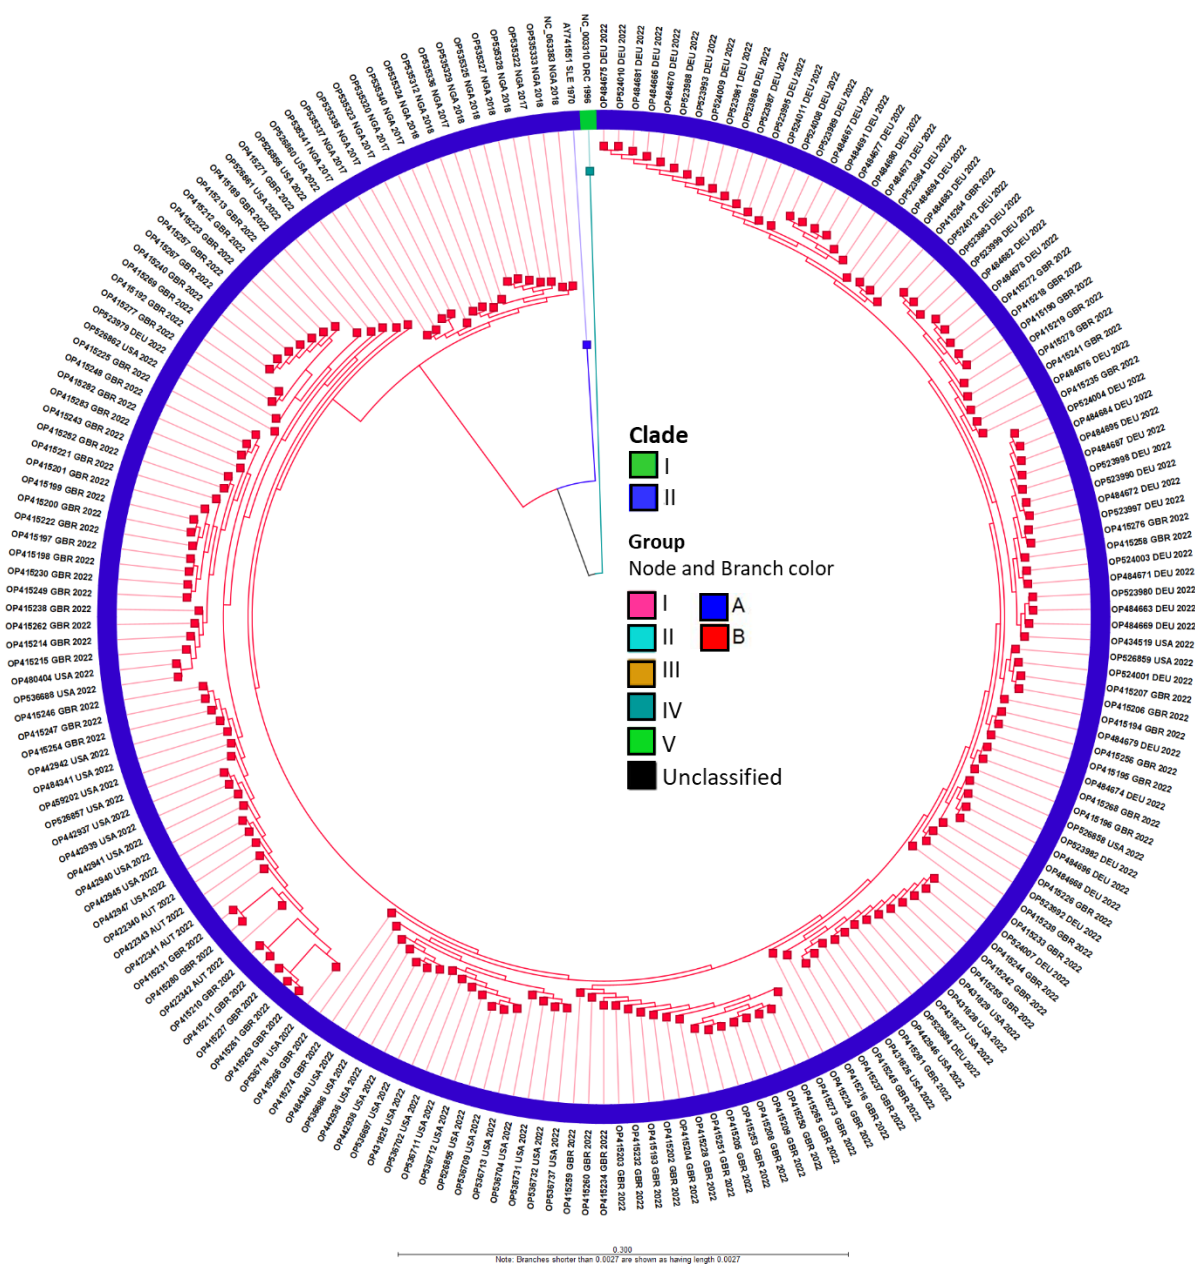



E

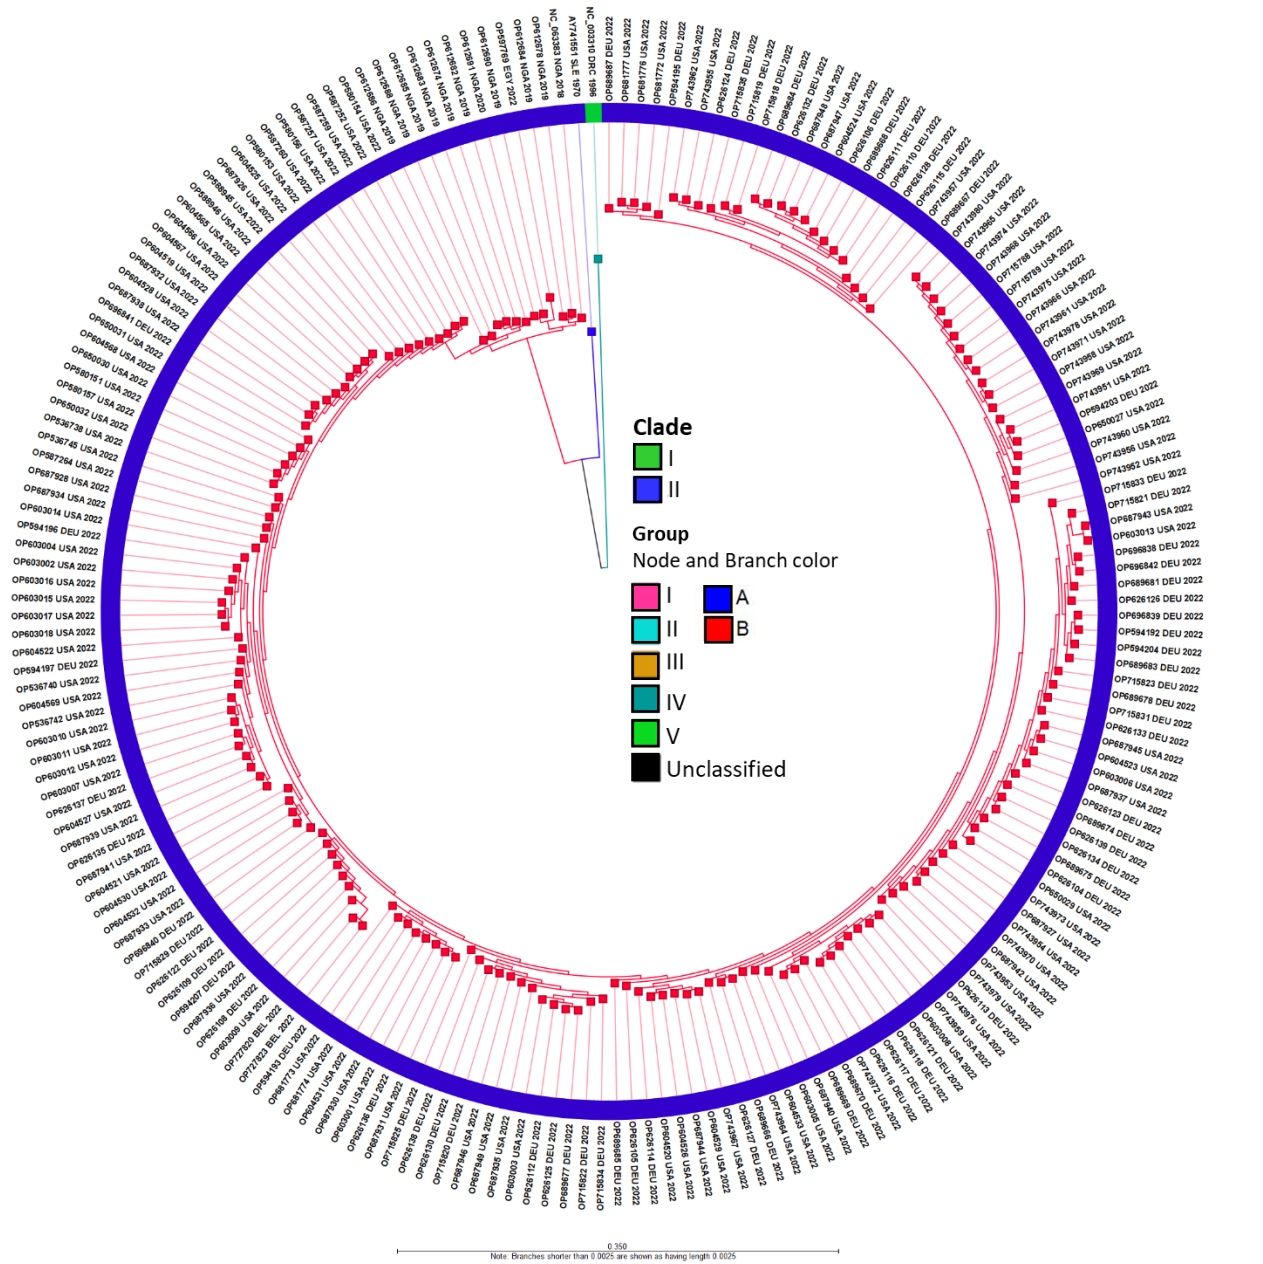

F

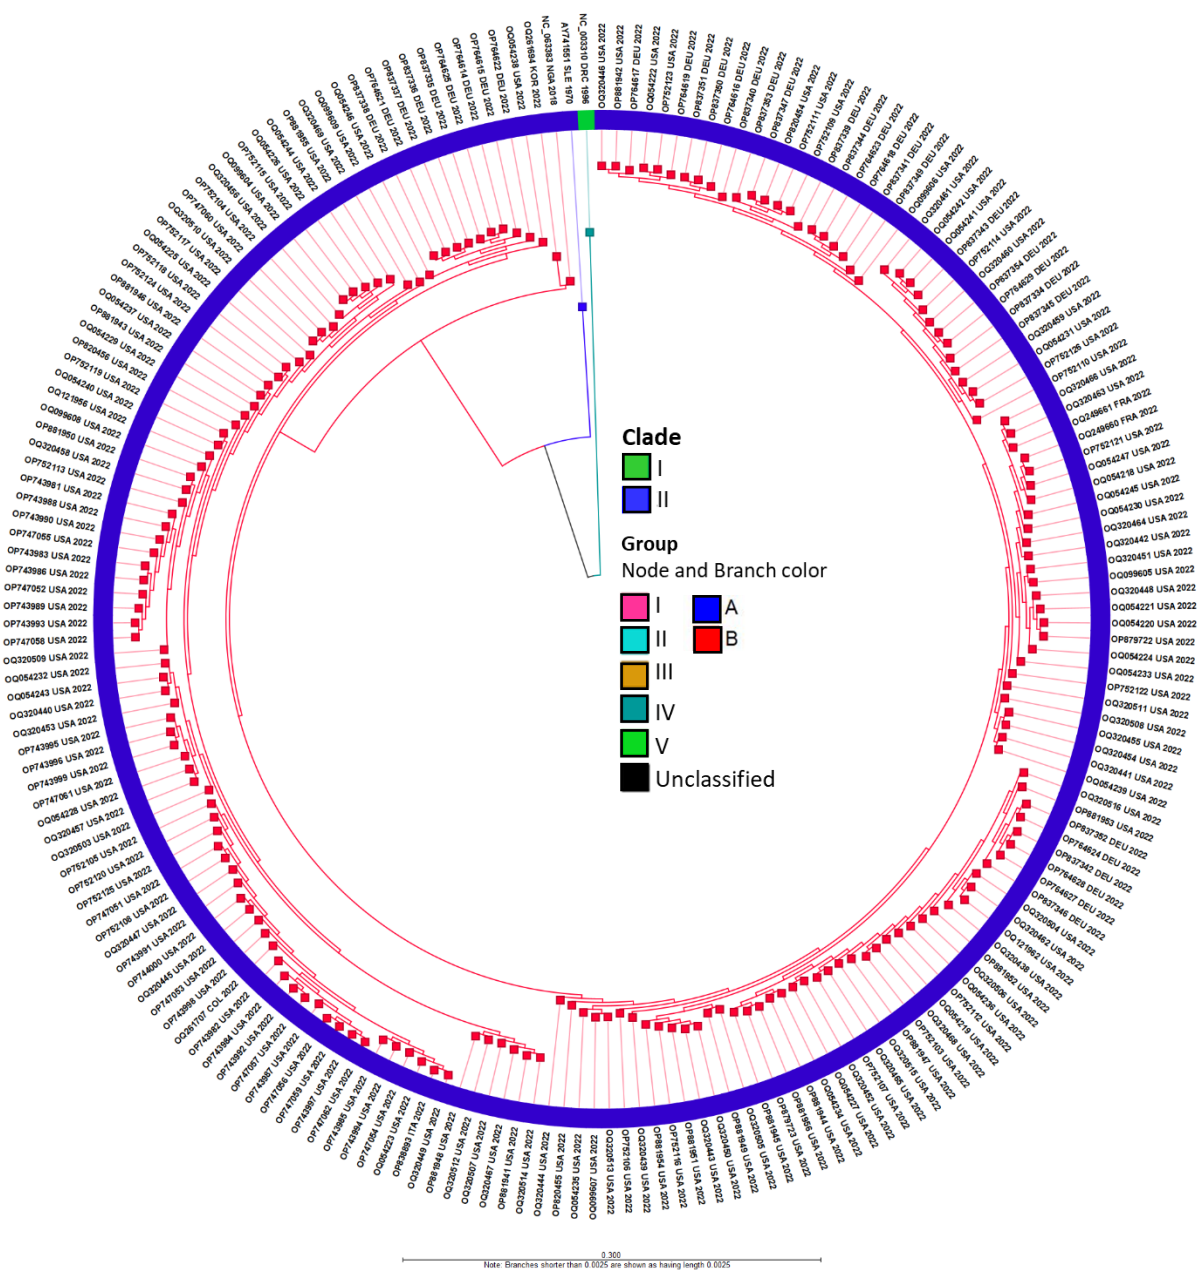

G

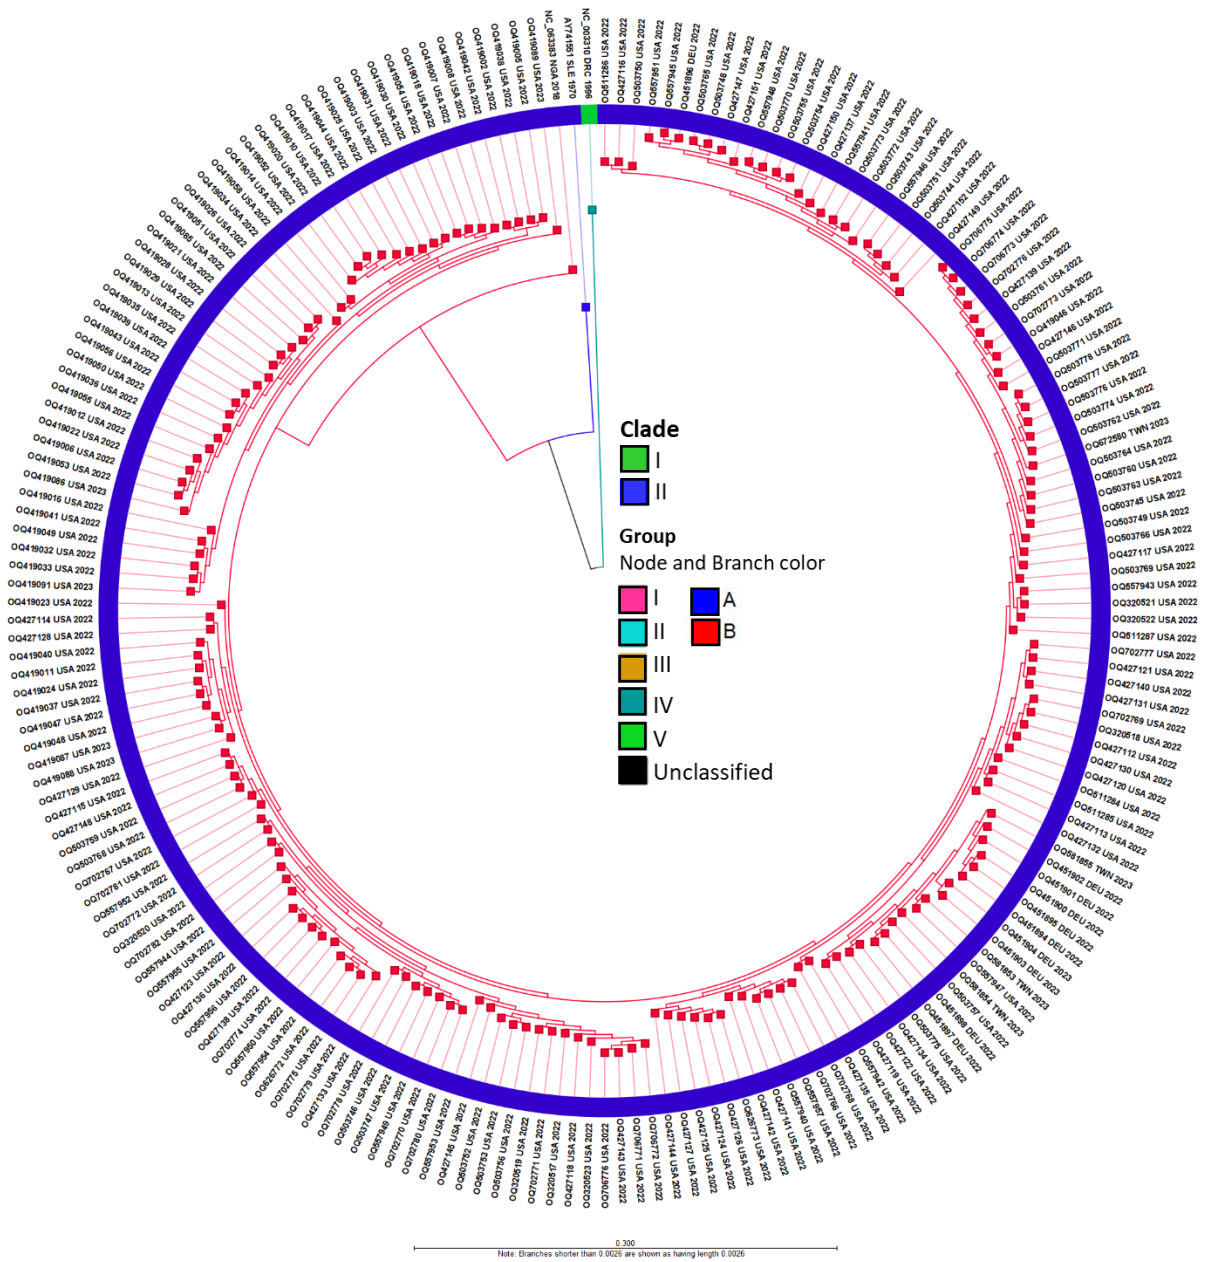

H

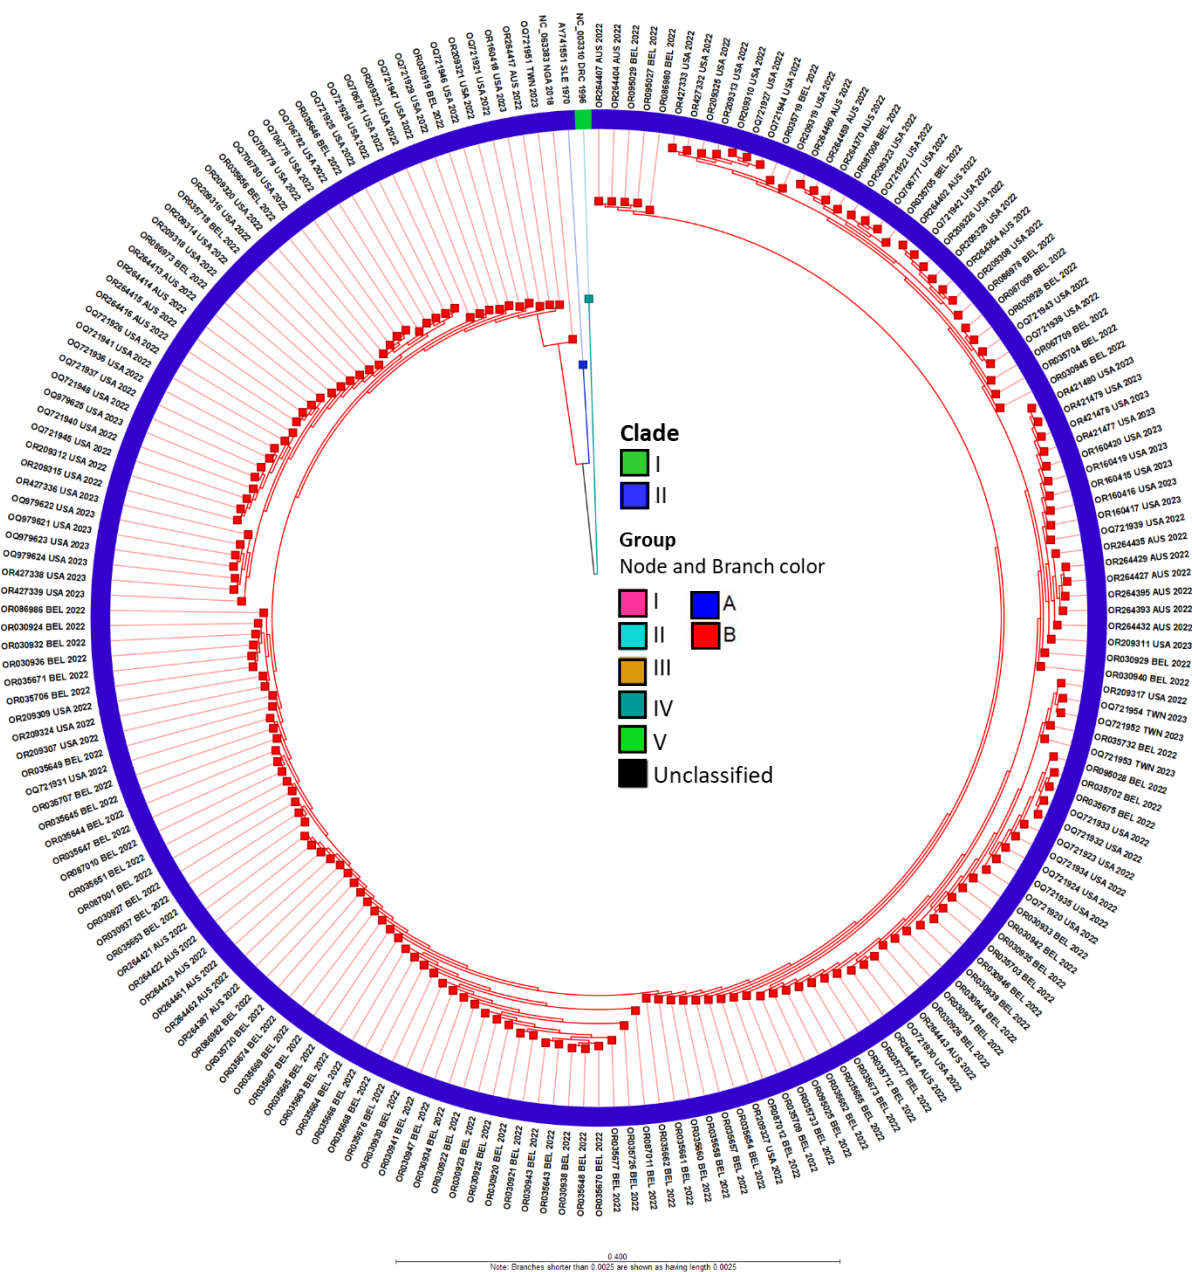



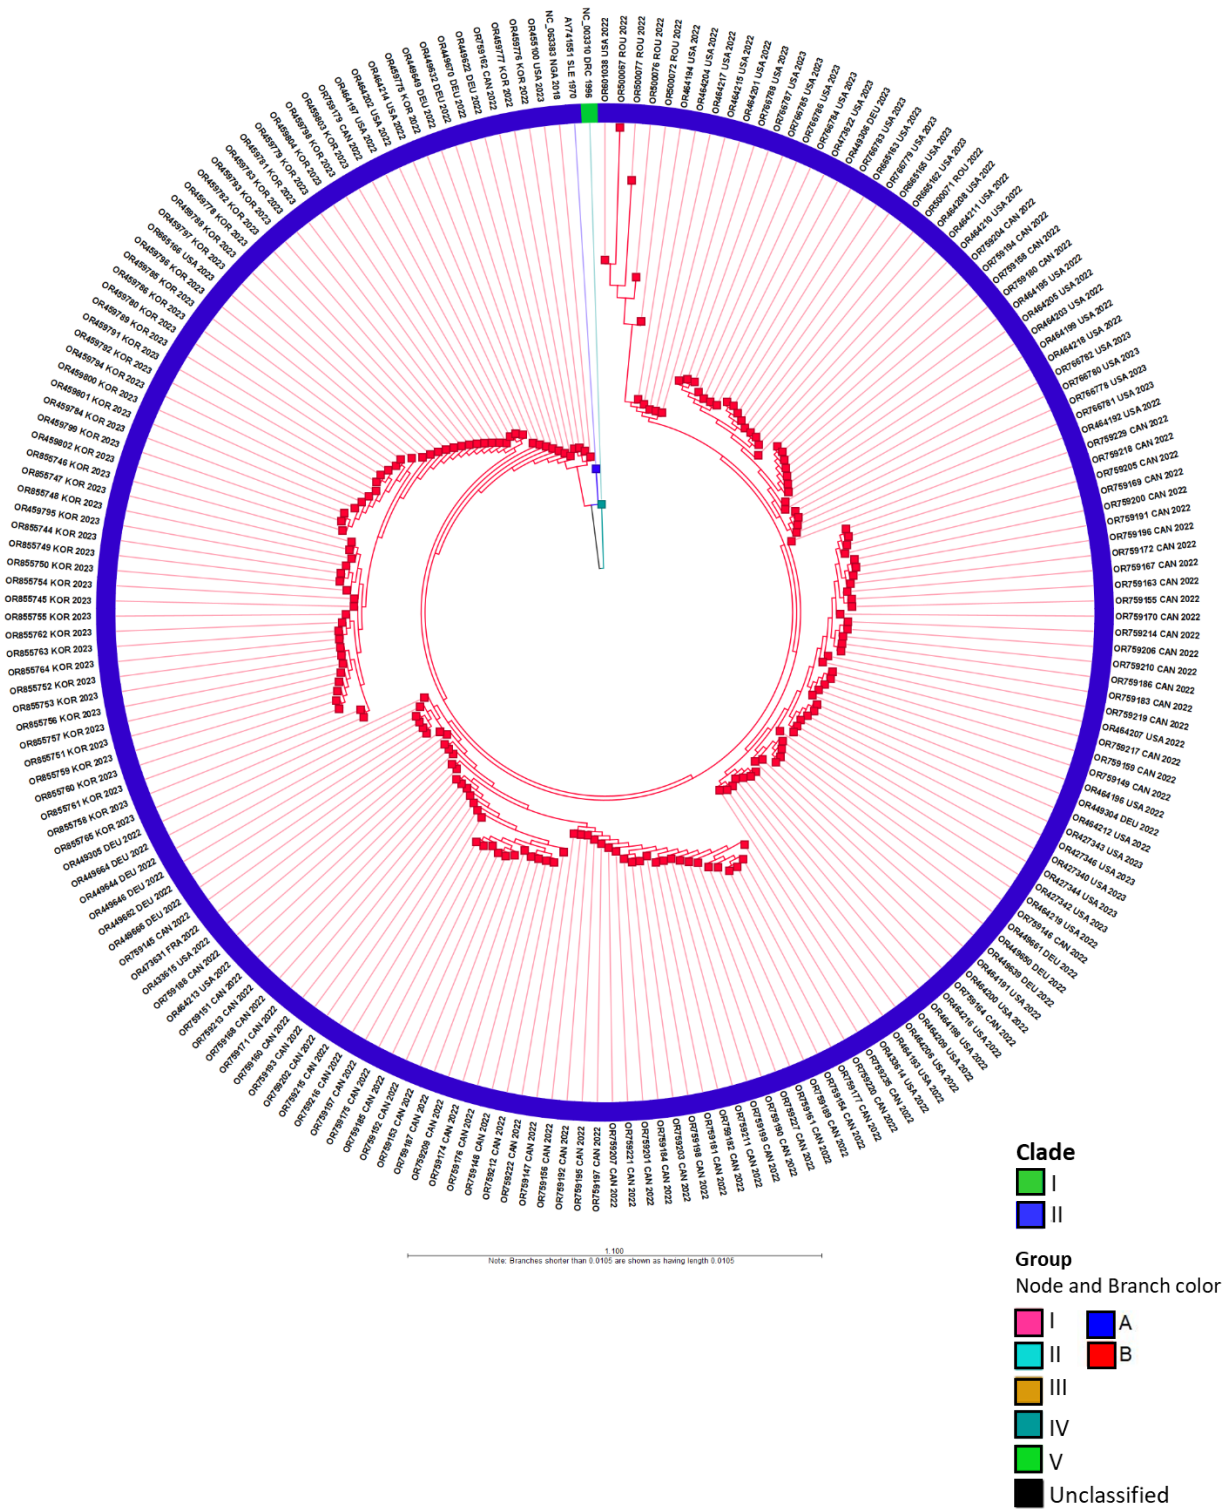

J

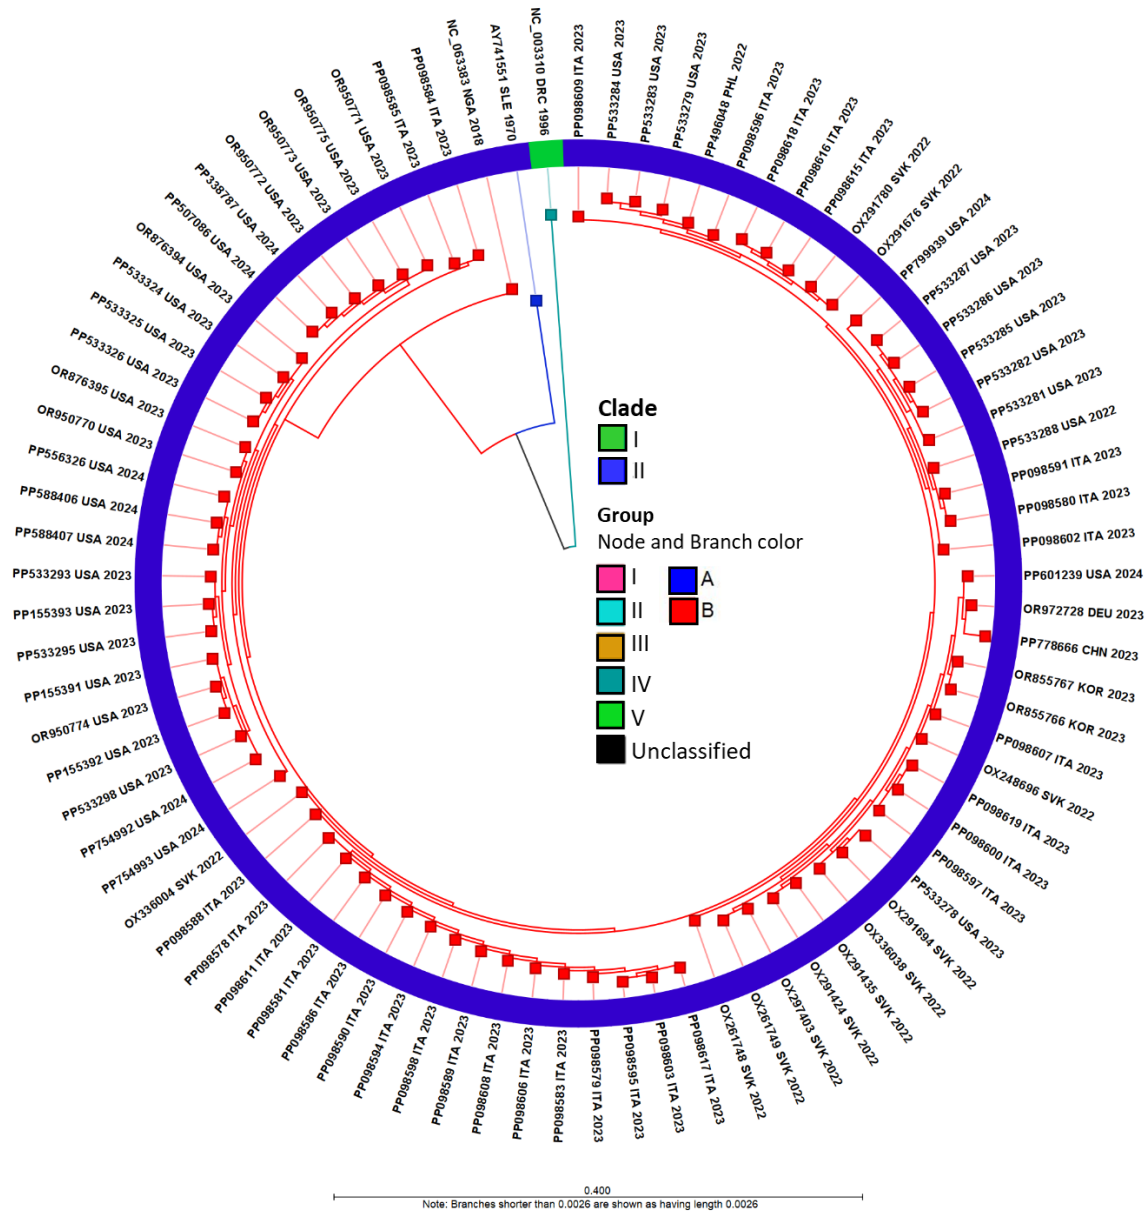

**Supplementary Figure S2. Circular phylograms of 1,878 MPXV genomes clustering with Clade IIB.** Three attributes of each genome (sequence accession number, 3-letter country code, and year collected) are displayed as the outermost ring for providing geo-temporal and evolutionary relationships. The MPXV reference genomes used in the alignments were from Clades I (NC\_003310), IIA (AY741551), and IIB (NC\_063383). (A) Phylogram of 199 genomes from LC753968\_JPN\_2022 to OP123049\_USA\_2022, (B) Phylogram of 200 genomes from OP123050\_USA\_2022 to OP257243\_USA\_2022, (C) Phylogram of 200 genomes from OP257244\_USA\_2022 to OP415188\_GBR\_2022, (D) Phylogram of 199 genomes from OP415189\_GBR\_2022 to OP536737\_USA\_2022, (E) Phylogram of 200 genomes from OP536738\_USA\_2022 to OP743980\_USA\_2022, (F) Phylogram of 200 genomes from OP743981\_USA\_2022 to OQ320516\_USA\_2022, (G) Phylogram of 199 genomes from OQ320517\_USA\_2022 to

OQ706776\_USA\_2022, **(H)** Phylogram of 199 genomes from OQ706777\_USA\_2022 to OR427339\_USA\_2023, **(I)** Phylogram of 200 genomes from OR427340\_USA\_2023 to OR855765\_KOR\_2023, **(J)** Phylogram of 82 genomes from OR855766\_KOR\_2023 to PP799939\_USA\_2024. Genome accession numbers (alphanumeric) are listed in ascending order for (A-J). The ANI NJ unrooted trees were constructed from the pairwise comparison tables.
