# Supplementary material for: Monkeypox Virus and Vaccinia Vaccines: Genomic and Antigenic Differences Relevant to Outbreaks and Vaccinology
Source: Preprints.org preprint supplement (doi:10.20944/preprints202410.2082.v1), 2024-10-28
Supplement: Supplementary file 1 [file supplementary]

## Sheet: MPXV Dataset N_1,878 clade IIB
Name	Modified	Description	Size	Accession	Latin name	Taxonomy	Common name	Linear	Acn_Ctry_Yr	Clade.v1	Clade.v2	Clade.v3	Continent	Country	Geo_Location	Group	Host_common name	Isolate	Year	Host	Assembly ID
LC753968	Wed Jun 26 18:51:23 CDT 2024	MPXV; 2; B_isolate MPXV/Japan/Tokyo/2022/TKY220165	197141	LC753968	MPXV_LC753968	Virus_dsDNA_env; Poxviridae; Chordopoxvirinae; Orthopoxvirus; MPXV; 2; B	Monkeypox virus	Linear	LC753968 JPN 2022	West Af	3	2	Asia	JPN	Japan: Tokyo	B	Human	MPXV/Japan/Tokyo/2022/TKY220165	2022	Homo sapiens	LC753968
LC753969	Wed Jun 26 18:51:23 CDT 2024	MPXV; 2; B_isolate MPXV/Japan/Tokyo/2022/TKY220176	197141	LC753969	MPXV_LC753969	Virus_dsDNA_env; Poxviridae; Chordopoxvirinae; Orthopoxvirus; MPXV; 2; B	Monkeypox virus	Linear	LC753969 JPN 2022	West Af	3	2	Asia	JPN	Japan: Tokyo	B	Human	MPXV/Japan/Tokyo/2022/TKY220176	2022	Homo sapiens	LC753969
LC753970	Wed Jun 26 18:51:23 CDT 2024	MPXV; 2; B_isolate MPXV/Japan/Tokyo/2022/TKY220187	197141	LC753970	MPXV_LC753970	Virus_dsDNA_env; Poxviridae; Chordopoxvirinae; Orthopoxvirus; MPXV; 2; B	Monkeypox virus	Linear	LC753970 JPN 2022	West Af	3	2	Asia	JPN	Japan: Tokyo	B	Human	MPXV/Japan/Tokyo/2022/TKY220187	2022	Homo sapiens	LC753970
LC756922	Wed Jun 26 18:51:23 CDT 2024	MPXV; 2; B_isolate MPXV/Japan/Tokyo/2023/TKY220310	197141	LC756922	MPXV_LC756922	Virus_dsDNA_env; Poxviridae; Chordopoxvirinae; Orthopoxvirus; MPXV; 2; B	Monkeypox virus	Linear	LC756922 JPN 2023	West Af	3	2	Asia	JPN	Japan: Tokyo	B	Human	MPXV/Japan/Tokyo/2023/TKY220310	2023	Homo sapiens	LC756922
LC756923	Wed Jun 26 18:51:23 CDT 2024	MPXV; 2; B_isolate MPXV/Japan/Tokyo/2023/TKY220318	197141	LC756923	MPXV_LC756923	Virus_dsDNA_env; Poxviridae; Chordopoxvirinae; Orthopoxvirus; MPXV; 2; B	Monkeypox virus	Linear	LC756923 JPN 2023	West Af	3	2	Asia	JPN	Japan: Tokyo	B	Human	MPXV/Japan/Tokyo/2023/TKY220318	2023	Homo sapiens	LC756923
LC756924	Wed Jun 26 18:51:23 CDT 2024	MPXV; 2; B_isolate MPXV/Japan/Tokyo/2023/TKY220325	197141	LC756924	MPXV_LC756924	Virus_dsDNA_env; Poxviridae; Chordopoxvirinae; Orthopoxvirus; MPXV; 2; B	Monkeypox virus	Linear	LC756924 JPN 2023	West Af	3	2	Asia	JPN	Japan: Tokyo	B	Human	MPXV/Japan/Tokyo/2023/TKY220325	2023	Homo sapiens	LC756924
LC756925	Wed Jun 26 18:51:23 CDT 2024	MPXV; 2; B_isolate MPXV/Japan/Tokyo/2023/TKY220342	197141	LC756925	MPXV_LC756925	Virus_dsDNA_env; Poxviridae; Chordopoxvirinae; Orthopoxvirus; MPXV; 2; B	Monkeypox virus	Linear	LC756925 JPN 2023	West Af	3	2	Asia	JPN	Japan: Tokyo	B	Human	MPXV/Japan/Tokyo/2023/TKY220342	2023	Homo sapiens	LC756925
LC760460	Wed Jun 26 18:51:23 CDT 2024	MPXV; 2; B_isolate MPXV/Japan/Tokyo/2023/TKY220304	197141	LC760460	MPXV_LC760460	Virus_dsDNA_env; Poxviridae; Chordopoxvirinae; Orthopoxvirus; MPXV; 2; B	Monkeypox virus	Linear	LC760460 JPN 2023	West Af	3	2	Asia	JPN	Japan: Tokyo	B	Human	MPXV/Japan/Tokyo/2023/TKY220304	2023	Homo sapiens	LC760460
LC760461	Wed Jun 26 18:51:23 CDT 2024	MPXV; 2; B_isolate MPXV/Japan/Tokyo/2023/TKY220343	197141	LC760461	MPXV_LC760461	Virus_dsDNA_env; Poxviridae; Chordopoxvirinae; Orthopoxvirus; MPXV; 2; B	Monkeypox virus	Linear	LC760461 JPN 2023	West Af	3	2	Asia	JPN	Japan: Tokyo	B	Human	MPXV/Japan/Tokyo/2023/TKY220343	2023	Homo sapiens	LC760461
ON853649	Wed Jun 26 18:51:23 CDT 2024	MPXV; 2; B_isolate MPXV/Germany/2022/RKI068	197140	ON853649	MPXV_ON853649	Virus_dsDNA_env; Poxviridae; Chordopoxvirinae; Orthopoxvirus; MPXV; 2; B	Monkeypox virus	Linear	ON853649 DEU 2022	West Af	3	2	Europe	DEU	Germany	B	Human	MPXV/Germany/2022/RKI068	2022	Homo sapiens	ON853649
ON853650	Wed Jun 26 18:51:23 CDT 2024	MPXV; 2; B_isolate MPXV/Germany/2022/RKI069	197140	ON853650	MPXV_ON853650	Virus_dsDNA_env; Poxviridae; Chordopoxvirinae; Orthopoxvirus; MPXV; 2; B	Monkeypox virus	Linear	ON853650 DEU 2022	West Af	3	2	Europe	DEU	Germany	B	Human	MPXV/Germany/2022/RKI069	2022	Homo sapiens	ON853650
ON853651	Wed Jun 26 18:51:23 CDT 2024	MPXV; 2; B_isolate MPXV/Germany/2022/RKI073	197140	ON853651	MPXV_ON853651	Virus_dsDNA_env; Poxviridae; Chordopoxvirinae; Orthopoxvirus; MPXV; 2; B	Monkeypox virus	Linear	ON853651 DEU 2022	West Af	3	2	Europe	DEU	Germany	B	Human	MPXV/Germany/2022/RKI073	2022	Homo sapiens	ON853651
ON853652	Wed Jun 26 18:51:23 CDT 2024	MPXV; 2; B_isolate MPXV/Germany/2022/RKI074	197140	ON853652	MPXV_ON853652	Virus_dsDNA_env; Poxviridae; Chordopoxvirinae; Orthopoxvirus; MPXV; 2; B	Monkeypox virus	Linear	ON853652 DEU 2022	West Af	3	2	Europe	DEU	Germany	B	Human	MPXV/Germany/2022/RKI074	2022	Homo sapiens	ON853652
ON853653	Wed Jun 26 18:51:23 CDT 2024	MPXV; 2; B_isolate MPXV/Germany/2022/RKI076	197140	ON853653	MPXV_ON853653	Virus_dsDNA_env; Poxviridae; Chordopoxvirinae; Orthopoxvirus; MPXV; 2; B	Monkeypox virus	Linear	ON853653 DEU 2022	West Af	3	2	Europe	DEU	Germany	B	Human	MPXV/Germany/2022/RKI076	2022	Homo sapiens	ON853653
ON853654	Wed Jun 26 18:51:23 CDT 2024	MPXV; 2; B_isolate MPXV/Germany/2022/RKI087	197140	ON853654	MPXV_ON853654	Virus_dsDNA_env; Poxviridae; Chordopoxvirinae; Orthopoxvirus; MPXV; 2; B	Monkeypox virus	Linear	ON853654 DEU 2022	West Af	3	2	Europe	DEU	Germany	B	Human	MPXV/Germany/2022/RKI087	2022	Homo sapiens	ON853654
ON853655	Wed Jun 26 18:51:23 CDT 2024	MPXV; 2; B_isolate MPXV/Germany/2022/RKI088	197140	ON853655	MPXV_ON853655	Virus_dsDNA_env; Poxviridae; Chordopoxvirinae; Orthopoxvirus; MPXV; 2; B	Monkeypox virus	Linear	ON853655 DEU 2022	West Af	3	2	Europe	DEU	Germany	B	Human	MPXV/Germany/2022/RKI088	2022	Homo sapiens	ON853655
ON853656	Wed Jun 26 18:51:23 CDT 2024	MPXV; 2; B_isolate MPXV/Germany/2022/RKI070	197140	ON853656	MPXV_ON853656	Virus_dsDNA_env; Poxviridae; Chordopoxvirinae; Orthopoxvirus; MPXV; 2; B	Monkeypox virus	Linear	ON853656 DEU 2022	West Af	3	2	Europe	DEU	Germany	B	Human	MPXV/Germany/2022/RKI070	2022	Homo sapiens	ON853656
ON853657	Wed Jun 26 18:51:23 CDT 2024	MPXV; 2; B_isolate MPXV/Germany/2022/RKI071	197140	ON853657	MPXV_ON853657	Virus_dsDNA_env; Poxviridae; Chordopoxvirinae; Orthopoxvirus; MPXV; 2; B	Monkeypox virus	Linear	ON853657 DEU 2022	West Af	3	2	Europe	DEU	Germany	B	Human	MPXV/Germany/2022/RKI071	2022	Homo sapiens	ON853657
ON853660	Wed Jun 26 18:51:23 CDT 2024	MPXV; 2; B_isolate MPXV/Germany/2022/RKI078	197140	ON853660	MPXV_ON853660	Virus_dsDNA_env; Poxviridae; Chordopoxvirinae; Orthopoxvirus; MPXV; 2; B	Monkeypox virus	Linear	ON853660 DEU 2022	West Af	3	2	Europe	DEU	Germany	B	Human	MPXV/Germany/2022/RKI078	2022	Homo sapiens	ON853660
ON853661	Wed Jun 26 18:51:23 CDT 2024	MPXV; 2; B_isolate MPXV/Germany/2022/RKI079	197140	ON853661	MPXV_ON853661	Virus_dsDNA_env; Poxviridae; Chordopoxvirinae; Orthopoxvirus; MPXV; 2; B	Monkeypox virus	Linear	ON853661 DEU 2022	West Af	3	2	Europe	DEU	Germany	B	Human	MPXV/Germany/2022/RKI079	2022	Homo sapiens	ON853661
ON853663	Wed Jun 26 18:51:23 CDT 2024	MPXV; 2; B_isolate MPXV/Germany/2022/RKI081	197140	ON853663	MPXV_ON853663	Virus_dsDNA_env; Poxviridae; Chordopoxvirinae; Orthopoxvirus; MPXV; 2; B	Monkeypox virus	Linear	ON853663 DEU 2022	West Af	3	2	Europe	DEU	Germany	B	Human	MPXV/Germany/2022/RKI081	2022	Homo sapiens	ON853663
ON853665	Wed Jun 26 18:51:23 CDT 2024	MPXV; 2; B_isolate MPXV/Germany/2022/RKI083	197140	ON853665	MPXV_ON853665	Virus_dsDNA_env; Poxviridae; Chordopoxvirinae; Orthopoxvirus; MPXV; 2; B	Monkeypox virus	Linear	ON853665 DEU 2022	West Af	3	2	Europe	DEU	Germany	B	Human	MPXV/Germany/2022/RKI083	2022	Homo sapiens	ON853665
ON853666	Wed Jun 26 18:51:23 CDT 2024	MPXV; 2; B_isolate MPXV/Germany/2022/RKI084	197140	ON853666	MPXV_ON853666	Virus_dsDNA_env; Poxviridae; Chordopoxvirinae; Orthopoxvirus; MPXV; 2; B	Monkeypox virus	Linear	ON853666 DEU 2022	West Af	3	2	Europe	DEU	Germany	B	Human	MPXV/Germany/2022/RKI084	2022	Homo sapiens	ON853666
ON853667	Wed Jun 26 18:51:23 CDT 2024	MPXV; 2; B_isolate MPXV/Germany/2022/RKI085	197140	ON853667	MPXV_ON853667	Virus_dsDNA_env; Poxviridae; Chordopoxvirinae; Orthopoxvirus; MPXV; 2; B	Monkeypox virus	Linear	ON853667 DEU 2022	West Af	3	2	Europe	DEU	Germany	B	Human	MPXV/Germany/2022/RKI085	2022	Homo sapiens	ON853667
ON853668	Wed Jun 26 18:51:23 CDT 2024	MPXV; 2; B_isolate MPXV/Germany/2022/RKI086	197140	ON853668	MPXV_ON853668	Virus_dsDNA_env; Poxviridae; Chordopoxvirinae; Orthopoxvirus; MPXV; 2; B	Monkeypox virus	Linear	ON853668 DEU 2022	West Af	3	2	Europe	DEU	Germany	B	Human	MPXV/Germany/2022/RKI086	2022	Homo sapiens	ON853668
ON853669	Wed Jun 26 18:51:23 CDT 2024	MPXV; 2; B_isolate MPXV/Germany/2022/RKI089	197140	ON853669	MPXV_ON853669	Virus_dsDNA_env; Poxviridae; Chordopoxvirinae; Orthopoxvirus; MPXV; 2; B	Monkeypox virus	Linear	ON853669 DEU 2022	West Af	3	2	Europe	DEU	Germany	B	Human	MPXV/Germany/2022/RKI089	2022	Homo sapiens	ON853669
ON853670	Wed Jun 26 18:51:23 CDT 2024	MPXV; 2; B_isolate MPXV/Germany/2022/RKI090	197140	ON853670	MPXV_ON853670	Virus_dsDNA_env; Poxviridae; Chordopoxvirinae; Orthopoxvirus; MPXV; 2; B	Monkeypox virus	Linear	ON853670 DEU 2022	West Af	3	2	Europe	DEU	Germany	B	Human	MPXV/Germany/2022/RKI090	2022	Homo sapiens	ON853670
ON853672	Wed Jun 26 18:51:23 CDT 2024	MPXV; 2; B_isolate MPXV/Germany/2022/RKI093	197140	ON853672	MPXV_ON853672	Virus_dsDNA_env; Poxviridae; Chordopoxvirinae; Orthopoxvirus; MPXV; 2; B	Monkeypox virus	Linear	ON853672 DEU 2022	West Af	3	2	Europe	DEU	Germany	B	Human	MPXV/Germany/2022/RKI093	2022	Homo sapiens	ON853672
ON853673	Wed Jun 26 18:51:23 CDT 2024	MPXV; 2; B_isolate MPXV/Germany/2022/RKI094	197140	ON853673	MPXV_ON853673	Virus_dsDNA_env; Poxviridae; Chordopoxvirinae; Orthopoxvirus; MPXV; 2; B	Monkeypox virus	Linear	ON853673 DEU 2022	West Af	3	2	Europe	DEU	Germany	B	Human	MPXV/Germany/2022/RKI094	2022	Homo sapiens	ON853673
ON853675	Wed Jun 26 18:51:23 CDT 2024	MPXV; 2; B_isolate MPXV/Germany/2022/RKI096	197140	ON853675	MPXV_ON853675	Virus_dsDNA_env; Poxviridae; Chordopoxvirinae; Orthopoxvirus; MPXV; 2; B	Monkeypox virus	Linear	ON853675 DEU 2022	West Af	3	2	Europe	DEU	Germany	B	Human	MPXV/Germany/2022/RKI096	2022	Homo sapiens	ON853675
ON853678	Wed Jun 26 18:51:23 CDT 2024	MPXV; 2; B_isolate MPXV/Germany/2022/RKI100	197140	ON853678	MPXV_ON853678	Virus_dsDNA_env; Poxviridae; Chordopoxvirinae; Orthopoxvirus; MPXV; 2; B	Monkeypox virus	Linear	ON853678 DEU 2022	West Af	3	2	Europe	DEU	Germany	B	Human	MPXV/Germany/2022/RKI100	2022	Homo sapiens	ON853678
ON853679	Wed Jun 26 18:51:23 CDT 2024	MPXV; 2; B_isolate MPXV/Germany/2022/RKI077	197136	ON853679	MPXV_ON853679	Virus_dsDNA_env; Poxviridae; Chordopoxvirinae; Orthopoxvirus; MPXV; 2; B	Monkeypox virus	Linear	ON853679 DEU 2022	West Af	3	2	Europe	DEU	Germany	B	Human	MPXV/Germany/2022/RKI077	2022	Homo sapiens	ON853679
ON853680	Wed Jun 26 18:51:23 CDT 2024	MPXV; 2; B_isolate MPXV/Germany/2022/RKI097	197136	ON853680	MPXV_ON853680	Virus_dsDNA_env; Poxviridae; Chordopoxvirinae; Orthopoxvirus; MPXV; 2; B	Monkeypox virus	Linear	ON853680 DEU 2022	West Af	3	2	Europe	DEU	Germany	B	Human	MPXV/Germany/2022/RKI097	2022	Homo sapiens	ON853680
ON853681	Wed Jun 26 18:51:23 CDT 2024	MPXV; 2; B_isolate MPXV/Germany/2022/RKI092	197131	ON853681	MPXV_ON853681	Virus_dsDNA_env; Poxviridae; Chordopoxvirinae; Orthopoxvirus; MPXV; 2; B	Monkeypox virus	Linear	ON853681 DEU 2022	West Af	3	2	Europe	DEU	Germany	B	Human	MPXV/Germany/2022/RKI092	2022	Homo sapiens	ON853681
ON853682	Wed Jun 26 18:51:23 CDT 2024	MPXV; 2; B_isolate MPXV/Germany/2022/RKI101	197134	ON853682	MPXV_ON853682	Virus_dsDNA_env; Poxviridae; Chordopoxvirinae; Orthopoxvirus; MPXV; 2; B	Monkeypox virus	Linear	ON853682 DEU 2022	West Af	3	2	Europe	DEU	Germany	B	Human	MPXV/Germany/2022/RKI101	2022	Homo sapiens	ON853682
ON880419	Wed Jun 26 18:51:23 CDT 2024	MPXV; 2; B_isolate MPX/UZ_REGA_3/Belgium/2022	197966	ON880419	MPXV_ON880419	Virus_dsDNA_env; Poxviridae; Chordopoxvirinae; Orthopoxvirus; MPXV; 2; B	Monkeypox virus	Linear	ON880419 BEL 2022	West Af	3	2	Europe	BEL	Belgium	B	Human	MPX/UZ_REGA_3/Belgium/2022	2022	Homo sapiens	ON880419
ON880420	Wed Jun 26 18:51:23 CDT 2024	MPXV; 2; B_isolate MPX/UZ_REGA_4/Belgium/2022	197970	ON880420	MPXV_ON880420	Virus_dsDNA_env; Poxviridae; Chordopoxvirinae; Orthopoxvirus; MPXV; 2; B	Monkeypox virus	Linear	ON880420 BEL 2022	West Af	3	2	Europe	BEL	Belgium	B	Human	MPX/UZ_REGA_4/Belgium/2022	2022	Homo sapiens	ON880420
ON880421	Wed Jun 26 18:51:23 CDT 2024	MPXV; 2; B_isolate MPX/UZ_REGA_5/Belgium/2022	197631	ON880421	MPXV_ON880421	Virus_dsDNA_env; Poxviridae; Chordopoxvirinae; Orthopoxvirus; MPXV; 2; B	Monkeypox virus	Linear	ON880421 BEL 2022	West Af	3	2	Europe	BEL	Belgium	B	Human	MPX/UZ_REGA_5/Belgium/2022	2022	Homo sapiens	ON880421
ON880422	Wed Jun 26 18:51:23 CDT 2024	MPXV; 2; B_isolate MPX/UZ_REGA_6/Belgium/2022	197908	ON880422	MPXV_ON880422	Virus_dsDNA_env; Poxviridae; Chordopoxvirinae; Orthopoxvirus; MPXV; 2; B	Monkeypox virus	Linear	ON880422 BEL 2022	West Af	3	2	Europe	BEL	Belgium	B	Human	MPX/UZ_REGA_6/Belgium/2022	2022	Homo sapiens	ON880422
ON880508	Wed Jun 26 18:51:23 CDT 2024	MPXV; 2; B_isolate MPXV/CAN/UN-NML-3127/2022	197169	ON880508	MPXV_ON880508	Virus_dsDNA_env; Poxviridae; Chordopoxvirinae; Orthopoxvirus; MPXV; 2; B	Monkeypox virus	Linear	ON880508 CAN 2022	West Af	3	2	N America	CAN	Canada	B	Human	MPXV/CAN/UN-NML-3127/2022	2022	Homo sapiens	ON880508
ON880511	Wed Jun 26 18:51:23 CDT 2024	MPXV; 2; B_isolate MPXV/CAN/UN-NML-3214/2022	197194	ON880511	MPXV_ON880511	Virus_dsDNA_env; Poxviridae; Chordopoxvirinae; Orthopoxvirus; MPXV; 2; B	Monkeypox virus	Linear	ON880511 CAN 2022	West Af	3	2	N America	CAN	Canada	B	Human	MPXV/CAN/UN-NML-3214/2022	2022	Homo sapiens	ON880511
ON880512	Wed Jun 26 18:51:23 CDT 2024	MPXV; 2; B_isolate MPXV/CAN/UN-NML-3292/2022	197183	ON880512	MPXV_ON880512	Virus_dsDNA_env; Poxviridae; Chordopoxvirinae; Orthopoxvirus; MPXV; 2; B	Monkeypox virus	Linear	ON880512 CAN 2022	West Af	3	2	N America	CAN	Canada	B	Human	MPXV/CAN/UN-NML-3292/2022	2022	Homo sapiens	ON880512
ON880513	Wed Jun 26 18:51:23 CDT 2024	MPXV; 2; B_isolate MPXV/CAN/UN-NML-3407/2022	197195	ON880513	MPXV_ON880513	Virus_dsDNA_env; Poxviridae; Chordopoxvirinae; Orthopoxvirus; MPXV; 2; B	Monkeypox virus	Linear	ON880513 CAN 2022	West Af	3	2	N America	CAN	Canada	B	Human	MPXV/CAN/UN-NML-3407/2022	2022	Homo sapiens	ON880513
ON880516	Wed Jun 26 18:51:23 CDT 2024	MPXV; 2; B_isolate MPXV/CAN/UN-NML-3472/2022	197195	ON880516	MPXV_ON880516	Virus_dsDNA_env; Poxviridae; Chordopoxvirinae; Orthopoxvirus; MPXV; 2; B	Monkeypox virus	Linear	ON880516 CAN 2022	West Af	3	2	N America	CAN	Canada	B	Human	MPXV/CAN/UN-NML-3472/2022	2022	Homo sapiens	ON880516
ON880517	Wed Jun 26 18:51:23 CDT 2024	MPXV; 2; B_isolate MPXV/CAN/UN-NML-3476/2022	197195	ON880517	MPXV_ON880517	Virus_dsDNA_env; Poxviridae; Chordopoxvirinae; Orthopoxvirus; MPXV; 2; B	Monkeypox virus	Linear	ON880517 CAN 2022	West Af	3	2	N America	CAN	Canada	B	Human	MPXV/CAN/UN-NML-3476/2022	2022	Homo sapiens	ON880517
ON880519	Wed Jun 26 18:51:23 CDT 2024	MPXV; 2; B_isolate MPXV/CAN/UN-NML-2833/2022	197194	ON880519	MPXV_ON880519	Virus_dsDNA_env; Poxviridae; Chordopoxvirinae; Orthopoxvirus; MPXV; 2; B	Monkeypox virus	Linear	ON880519 CAN 2022	West Af	3	2	N America	CAN	Canada	B	Human	MPXV/CAN/UN-NML-2833/2022	2022	Homo sapiens	ON880519
ON880526	Wed Jun 26 18:51:23 CDT 2024	MPXV; 2; B_isolate MPXV/CAN/UN-NML-3100/2022	197194	ON880526	MPXV_ON880526	Virus_dsDNA_env; Poxviridae; Chordopoxvirinae; Orthopoxvirus; MPXV; 2; B	Monkeypox virus	Linear	ON880526 CAN 2022	West Af	3	2	N America	CAN	Canada	B	Human	MPXV/CAN/UN-NML-3100/2022	2022	Homo sapiens	ON880526
ON880530	Wed Jun 26 18:51:23 CDT 2024	MPXV; 2; B_isolate MPXV/CAN/UN-NML-3162/2022	197194	ON880530	MPXV_ON880530	Virus_dsDNA_env; Poxviridae; Chordopoxvirinae; Orthopoxvirus; MPXV; 2; B	Monkeypox virus	Linear	ON880530 CAN 2022	West Af	3	2	N America	CAN	Canada	B	Human	MPXV/CAN/UN-NML-3162/2022	2022	Homo sapiens	ON880530
ON880534	Wed Jun 26 18:51:23 CDT 2024	MPXV; 2; B_isolate MPXV/CAN/UN-NML-3262/2022	197194	ON880534	MPXV_ON880534	Virus_dsDNA_env; Poxviridae; Chordopoxvirinae; Orthopoxvirus; MPXV; 2; B	Monkeypox virus	Linear	ON880534 CAN 2022	West Af	3	2	N America	CAN	Canada	B	Human	MPXV/CAN/UN-NML-3262/2022	2022	Homo sapiens	ON880534
ON880536	Wed Jun 26 18:51:23 CDT 2024	MPXV; 2; B_isolate MPXV/CAN/UN-NML-3272/2022	197194	ON880536	MPXV_ON880536	Virus_dsDNA_env; Poxviridae; Chordopoxvirinae; Orthopoxvirus; MPXV; 2; B	Monkeypox virus	Linear	ON880536 CAN 2022	West Af	3	2	N America	CAN	Canada	B	Human	MPXV/CAN/UN-NML-3272/2022	2022	Homo sapiens	ON880536
ON880537	Wed Jun 26 18:51:23 CDT 2024	MPXV; 2; B_isolate MPXV/CAN/UN-NML-3273/2022	197206	ON880537	MPXV_ON880537	Virus_dsDNA_env; Poxviridae; Chordopoxvirinae; Orthopoxvirus; MPXV; 2; B	Monkeypox virus	Linear	ON880537 CAN 2022	West Af	3	2	N America	CAN	Canada	B	Human	MPXV/CAN/UN-NML-3273/2022	2022	Homo sapiens	ON880537
ON880538	Wed Jun 26 18:51:23 CDT 2024	MPXV; 2; B_isolate MPXV/CAN/UN-NML-3336/2022	197193	ON880538	MPXV_ON880538	Virus_dsDNA_env; Poxviridae; Chordopoxvirinae; Orthopoxvirus; MPXV; 2; B	Monkeypox virus	Linear	ON880538 CAN 2022	West Af	3	2	N America	CAN	Canada	B	Human	MPXV/CAN/UN-NML-3336/2022	2022	Homo sapiens	ON880538
ON880539	Wed Jun 26 18:51:23 CDT 2024	MPXV; 2; B_isolate MPXV/CAN/UN-NML-3339/2022	197195	ON880539	MPXV_ON880539	Virus_dsDNA_env; Poxviridae; Chordopoxvirinae; Orthopoxvirus; MPXV; 2; B	Monkeypox virus	Linear	ON880539 CAN 2022	West Af	3	2	N America	CAN	Canada	B	Human	MPXV/CAN/UN-NML-3339/2022	2022	Homo sapiens	ON880539
ON880540	Wed Jun 26 18:51:23 CDT 2024	MPXV; 2; B_isolate MPXV/CAN/UN-NML-3342/2022	197195	ON880540	MPXV_ON880540	Virus_dsDNA_env; Poxviridae; Chordopoxvirinae; Orthopoxvirus; MPXV; 2; B	Monkeypox virus	Linear	ON880540 CAN 2022	West Af	3	2	N America	CAN	Canada	B	Human	MPXV/CAN/UN-NML-3342/2022	2022	Homo sapiens	ON880540
ON880542	Wed Jun 26 18:51:23 CDT 2024	MPXV; 2; B_isolate MPXV/CAN/UN-NML-3348/2022	197195	ON880542	MPXV_ON880542	Virus_dsDNA_env; Poxviridae; Chordopoxvirinae; Orthopoxvirus; MPXV; 2; B	Monkeypox virus	Linear	ON880542 CAN 2022	West Af	3	2	N America	CAN	Canada	B	Human	MPXV/CAN/UN-NML-3348/2022	2022	Homo sapiens	ON880542
ON880543	Wed Jun 26 18:51:23 CDT 2024	MPXV; 2; B_isolate MPXV/CAN/UN-NML-3357/2022	197193	ON880543	MPXV_ON880543	Virus_dsDNA_env; Poxviridae; Chordopoxvirinae; Orthopoxvirus; MPXV; 2; B	Monkeypox virus	Linear	ON880543 CAN 2022	West Af	3	2	N America	CAN	Canada	B	Human	MPXV/CAN/UN-NML-3357/2022	2022	Homo sapiens	ON880543
ON880545	Wed Jun 26 18:51:23 CDT 2024	MPXV; 2; B_isolate MPXV/CAN/UN-NML-3366/2022	197195	ON880545	MPXV_ON880545	Virus_dsDNA_env; Poxviridae; Chordopoxvirinae; Orthopoxvirus; MPXV; 2; B	Monkeypox virus	Linear	ON880545 CAN 2022	West Af	3	2	N America	CAN	Canada	B	Human	MPXV/CAN/UN-NML-3366/2022	2022	Homo sapiens	ON880545
ON880546	Wed Jun 26 18:51:23 CDT 2024	MPXV; 2; B_isolate MPXV/CAN/UN-NML-3368/2022	197195	ON880546	MPXV_ON880546	Virus_dsDNA_env; Poxviridae; Chordopoxvirinae; Orthopoxvirus; MPXV; 2; B	Monkeypox virus	Linear	ON880546 CAN 2022	West Af	3	2	N America	CAN	Canada	B	Human	MPXV/CAN/UN-NML-3368/2022	2022	Homo sapiens	ON880546
ON880547	Wed Jun 26 18:51:23 CDT 2024	MPXV; 2; B_isolate MPXV/CAN/UN-NML-3441/2022	197194	ON880547	MPXV_ON880547	Virus_dsDNA_env; Poxviridae; Chordopoxvirinae; Orthopoxvirus; MPXV; 2; B	Monkeypox virus	Linear	ON880547 CAN 2022	West Af	3	2	N America	CAN	Canada	B	Human	MPXV/CAN/UN-NML-3441/2022	2022	Homo sapiens	ON880547
ON880548	Wed Jun 26 18:51:23 CDT 2024	MPXV; 2; B_isolate MPXV/CAN/UN-NML-3448/2022	197195	ON880548	MPXV_ON880548	Virus_dsDNA_env; Poxviridae; Chordopoxvirinae; Orthopoxvirus; MPXV; 2; B	Monkeypox virus	Linear	ON880548 CAN 2022	West Af	3	2	N America	CAN	Canada	B	Human	MPXV/CAN/UN-NML-3448/2022	2022	Homo sapiens	ON880548
ON880549	Wed Jun 26 18:51:23 CDT 2024	MPXV; 2; B_isolate MPXV/CAN/UN-NML-3450/2022	197198	ON880549	MPXV_ON880549	Virus_dsDNA_env; Poxviridae; Chordopoxvirinae; Orthopoxvirus; MPXV; 2; B	Monkeypox virus	Linear	ON880549 CAN 2022	West Af	3	2	N America	CAN	Canada	B	Human	MPXV/CAN/UN-NML-3450/2022	2022	Homo sapiens	ON880549
ON911481	Wed Jun 26 18:51:23 CDT 2024	MPXV; 2; B_isolate MPXV/MX-UANL001/2022	197413	ON911481	MPXV_ON911481	Virus_dsDNA_env; Poxviridae; Chordopoxvirinae; Orthopoxvirus; MPXV; 2; B	Monkeypox virus	Linear	ON911481 MEX 2022	West Af	3	2	N America	MEX	Mexico: Nuevo Leon	B	Human	MPXV/MX-UANL001/2022	2022	Homo sapiens	ON911481
ON918611	Wed Jun 26 18:51:23 CDT 2024	MPXV; 2; B_isolate NICD-SVPL223	197213	ON918611	MPXV_ON918611	Virus_dsDNA_env; Poxviridae; Chordopoxvirinae; Orthopoxvirus; MPXV; 2; B	Monkeypox virus	Linear	ON918611 ZAF 2022	West Af	3	2	S Africa	ZAF	South Africa	B	Human	NICD-SVPL223	2022	Homo sapiens	ON918611
ON918656	Wed Jun 26 18:51:23 CDT 2024	MPXV; 2; B_isolate MPXV/Taiwan/110-231642/2022	197315	ON918656	MPXV_ON918656	Virus_dsDNA_env; Poxviridae; Chordopoxvirinae; Orthopoxvirus; MPXV; 2; B	Monkeypox virus	Linear	ON918656 TWN 2022	West Af	3	2	Asia	TWN	Taiwan	B	Human	MPXV/Taiwan/110-231642/2022	2022	Homo sapiens	ON918656
ON927248	Wed Jun 26 18:51:23 CDT 2024	MPXV; 2; B_isolate NICD-SVPL232	197126	ON927248	MPXV_ON927248	Virus_dsDNA_env; Poxviridae; Chordopoxvirinae; Orthopoxvirus; MPXV; 2; B	Monkeypox virus	Linear	ON927248 ZAF 2022	West Af	3	2	S Africa	ZAF	South Africa	B	Human	NICD-SVPL232	2022	Homo sapiens	ON927248
ON929057	Wed Jun 26 18:51:23 CDT 2024	MPXV; 2; B_isolate MPXV/Germany/2022/RKI070	197140	ON929057	MPXV_ON929057	Virus_dsDNA_env; Poxviridae; Chordopoxvirinae; Orthopoxvirus; MPXV; 2; B	Monkeypox virus	Linear	ON929057 DEU 2022	West Af	3	2	Europe	DEU	Germany	B	Human	MPXV/Germany/2022/RKI070	2022	Homo sapiens	ON929057
ON929058	Wed Jun 26 18:51:23 CDT 2024	MPXV; 2; B_isolate MPXV/Germany/2022/RKI071	197139	ON929058	MPXV_ON929058	Virus_dsDNA_env; Poxviridae; Chordopoxvirinae; Orthopoxvirus; MPXV; 2; B	Monkeypox virus	Linear	ON929058 DEU 2022	West Af	3	2	Europe	DEU	Germany	B	Human	MPXV/Germany/2022/RKI071	2022	Homo sapiens	ON929058
ON929059	Wed Jun 26 18:51:23 CDT 2024	MPXV; 2; B_isolate MPXV/Germany/2022/RKI072	197140	ON929059	MPXV_ON929059	Virus_dsDNA_env; Poxviridae; Chordopoxvirinae; Orthopoxvirus; MPXV; 2; B	Monkeypox virus	Linear	ON929059 DEU 2022	West Af	3	2	Europe	DEU	Germany	B	Human	MPXV/Germany/2022/RKI072	2022	Homo sapiens	ON929059
ON929061	Wed Jun 26 18:51:23 CDT 2024	MPXV; 2; B_isolate MPXV/Germany/2022/RKI103	197140	ON929061	MPXV_ON929061	Virus_dsDNA_env; Poxviridae; Chordopoxvirinae; Orthopoxvirus; MPXV; 2; B	Monkeypox virus	Linear	ON929061 DEU 2022	West Af	3	2	Europe	DEU	Germany	B	Human	MPXV/Germany/2022/RKI103	2022	Homo sapiens	ON929061
ON929063	Wed Jun 26 18:51:23 CDT 2024	MPXV; 2; B_isolate MPXV/Germany/2022/RKI105	197140	ON929063	MPXV_ON929063	Virus_dsDNA_env; Poxviridae; Chordopoxvirinae; Orthopoxvirus; MPXV; 2; B	Monkeypox virus	Linear	ON929063 DEU 2022	West Af	3	2	Europe	DEU	Germany	B	Human	MPXV/Germany/2022/RKI105	2022	Homo sapiens	ON929063
ON929064	Wed Jun 26 18:51:23 CDT 2024	MPXV; 2; B_isolate MPXV/Germany/2022/RKI106	197139	ON929064	MPXV_ON929064	Virus_dsDNA_env; Poxviridae; Chordopoxvirinae; Orthopoxvirus; MPXV; 2; B	Monkeypox virus	Linear	ON929064 DEU 2022	West Af	3	2	Europe	DEU	Germany	B	Human	MPXV/Germany/2022/RKI106	2022	Homo sapiens	ON929064
ON929065	Wed Jun 26 18:51:23 CDT 2024	MPXV; 2; B_isolate MPXV/Germany/2022/RKI107	197139	ON929065	MPXV_ON929065	Virus_dsDNA_env; Poxviridae; Chordopoxvirinae; Orthopoxvirus; MPXV; 2; B	Monkeypox virus	Linear	ON929065 DEU 2022	West Af	3	2	Europe	DEU	Germany	B	Human	MPXV/Germany/2022/RKI107	2022	Homo sapiens	ON929065
ON929066	Wed Jun 26 18:51:23 CDT 2024	MPXV; 2; B_isolate MPXV/Germany/2022/RKI108	197140	ON929066	MPXV_ON929066	Virus_dsDNA_env; Poxviridae; Chordopoxvirinae; Orthopoxvirus; MPXV; 2; B	Monkeypox virus	Linear	ON929066 DEU 2022	West Af	3	2	Europe	DEU	Germany	B	Human	MPXV/Germany/2022/RKI108	2022	Homo sapiens	ON929066
ON929067	Wed Jun 26 18:51:23 CDT 2024	MPXV; 2; B_isolate MPXV/Germany/2022/RKI109	197140	ON929067	MPXV_ON929067	Virus_dsDNA_env; Poxviridae; Chordopoxvirinae; Orthopoxvirus; MPXV; 2; B	Monkeypox virus	Linear	ON929067 DEU 2022	West Af	3	2	Europe	DEU	Germany	B	Human	MPXV/Germany/2022/RKI109	2022	Homo sapiens	ON929067
ON929068	Wed Jun 26 18:51:23 CDT 2024	MPXV; 2; B_isolate MPXV/Germany/2022/RKI110	197139	ON929068	MPXV_ON929068	Virus_dsDNA_env; Poxviridae; Chordopoxvirinae; Orthopoxvirus; MPXV; 2; B	Monkeypox virus	Linear	ON929068 DEU 2022	West Af	3	2	Europe	DEU	Germany	B	Human	MPXV/Germany/2022/RKI110	2022	Homo sapiens	ON929068
ON929069	Wed Jun 26 18:51:23 CDT 2024	MPXV; 2; B_isolate MPXV/Germany/2022/RKI111	197140	ON929069	MPXV_ON929069	Virus_dsDNA_env; Poxviridae; Chordopoxvirinae; Orthopoxvirus; MPXV; 2; B	Monkeypox virus	Linear	ON929069 DEU 2022	West Af	3	2	Europe	DEU	Germany	B	Human	MPXV/Germany/2022/RKI111	2022	Homo sapiens	ON929069
ON929070	Wed Jun 26 18:51:23 CDT 2024	MPXV; 2; B_isolate MPXV/Germany/2022/RKI112	197139	ON929070	MPXV_ON929070	Virus_dsDNA_env; Poxviridae; Chordopoxvirinae; Orthopoxvirus; MPXV; 2; B	Monkeypox virus	Linear	ON929070 DEU 2022	West Af	3	2	Europe	DEU	Germany	B	Human	MPXV/Germany/2022/RKI112	2022	Homo sapiens	ON929070
ON929071	Wed Jun 26 18:51:23 CDT 2024	MPXV; 2; B_isolate MPXV/Germany/2022/RKI113	197139	ON929071	MPXV_ON929071	Virus_dsDNA_env; Poxviridae; Chordopoxvirinae; Orthopoxvirus; MPXV; 2; B	Monkeypox virus	Linear	ON929071 DEU 2022	West Af	3	2	Europe	DEU	Germany	B	Human	MPXV/Germany/2022/RKI113	2022	Homo sapiens	ON929071
ON929072	Wed Jun 26 18:51:23 CDT 2024	MPXV; 2; B_isolate MPXV/Germany/2022/RKI114	197139	ON929072	MPXV_ON929072	Virus_dsDNA_env; Poxviridae; Chordopoxvirinae; Orthopoxvirus; MPXV; 2; B	Monkeypox virus	Linear	ON929072 DEU 2022	West Af	3	2	Europe	DEU	Germany	B	Human	MPXV/Germany/2022/RKI114	2022	Homo sapiens	ON929072
ON929074	Wed Jun 26 18:51:23 CDT 2024	MPXV; 2; B_isolate MPXV/Germany/2022/RKI119	197139	ON929074	MPXV_ON929074	Virus_dsDNA_env; Poxviridae; Chordopoxvirinae; Orthopoxvirus; MPXV; 2; B	Monkeypox virus	Linear	ON929074 DEU 2022	West Af	3	2	Europe	DEU	Germany	B	Human	MPXV/Germany/2022/RKI119	2022	Homo sapiens	ON929074
ON929075	Wed Jun 26 18:51:23 CDT 2024	MPXV; 2; B_isolate MPXV/Germany/2022/RKI120	197139	ON929075	MPXV_ON929075	Virus_dsDNA_env; Poxviridae; Chordopoxvirinae; Orthopoxvirus; MPXV; 2; B	Monkeypox virus	Linear	ON929075 DEU 2022	West Af	3	2	Europe	DEU	Germany	B	Human	MPXV/Germany/2022/RKI120	2022	Homo sapiens	ON929075
ON929076	Wed Jun 26 18:51:23 CDT 2024	MPXV; 2; B_isolate MPXV/Germany/2022/RKI121	197139	ON929076	MPXV_ON929076	Virus_dsDNA_env; Poxviridae; Chordopoxvirinae; Orthopoxvirus; MPXV; 2; B	Monkeypox virus	Linear	ON929076 DEU 2022	West Af	3	2	Europe	DEU	Germany	B	Human	MPXV/Germany/2022/RKI121	2022	Homo sapiens	ON929076
ON929078	Wed Jun 26 18:51:23 CDT 2024	MPXV; 2; B_isolate MPXV/Germany/2022/RKI123	197141	ON929078	MPXV_ON929078	Virus_dsDNA_env; Poxviridae; Chordopoxvirinae; Orthopoxvirus; MPXV; 2; B	Monkeypox virus	Linear	ON929078 DEU 2022	West Af	3	2	Europe	DEU	Germany	B	Human	MPXV/Germany/2022/RKI123	2022	Homo sapiens	ON929078
ON929079	Wed Jun 26 18:51:23 CDT 2024	MPXV; 2; B_isolate MPXV/Germany/2022/RKI124	197140	ON929079	MPXV_ON929079	Virus_dsDNA_env; Poxviridae; Chordopoxvirinae; Orthopoxvirus; MPXV; 2; B	Monkeypox virus	Linear	ON929079 DEU 2022	West Af	3	2	Europe	DEU	Germany	B	Human	MPXV/Germany/2022/RKI124	2022	Homo sapiens	ON929079
ON929080	Wed Jun 26 18:51:23 CDT 2024	MPXV; 2; B_isolate MPXV/Germany/2022/RKI125	197139	ON929080	MPXV_ON929080	Virus_dsDNA_env; Poxviridae; Chordopoxvirinae; Orthopoxvirus; MPXV; 2; B	Monkeypox virus	Linear	ON929080 DEU 2022	West Af	3	2	Europe	DEU	Germany	B	Human	MPXV/Germany/2022/RKI125	2022	Homo sapiens	ON929080
ON929081	Wed Jun 26 18:51:23 CDT 2024	MPXV; 2; B_isolate MPXV/Germany/2022/RKI126	197139	ON929081	MPXV_ON929081	Virus_dsDNA_env; Poxviridae; Chordopoxvirinae; Orthopoxvirus; MPXV; 2; B	Monkeypox virus	Linear	ON929081 DEU 2022	West Af	3	2	Europe	DEU	Germany	B	Human	MPXV/Germany/2022/RKI126	2022	Homo sapiens	ON929081
ON929082	Wed Jun 26 18:51:23 CDT 2024	MPXV; 2; B_isolate MPXV/Germany/2022/RKI127	197139	ON929082	MPXV_ON929082	Virus_dsDNA_env; Poxviridae; Chordopoxvirinae; Orthopoxvirus; MPXV; 2; B	Monkeypox virus	Linear	ON929082 DEU 2022	West Af	3	2	Europe	DEU	Germany	B	Human	MPXV/Germany/2022/RKI127	2022	Homo sapiens	ON929082
ON929083	Wed Jun 26 18:51:23 CDT 2024	MPXV; 2; B_isolate MPXV/Germany/2022/RKI128	197139	ON929083	MPXV_ON929083	Virus_dsDNA_env; Poxviridae; Chordopoxvirinae; Orthopoxvirus; MPXV; 2; B	Monkeypox virus	Linear	ON929083 DEU 2022	West Af	3	2	Europe	DEU	Germany	B	Human	MPXV/Germany/2022/RKI128	2022	Homo sapiens	ON929083
ON929084	Wed Jun 26 18:51:23 CDT 2024	MPXV; 2; B_isolate MPXV/Germany/2022/RKI129	197140	ON929084	MPXV_ON929084	Virus_dsDNA_env; Poxviridae; Chordopoxvirinae; Orthopoxvirus; MPXV; 2; B	Monkeypox virus	Linear	ON929084 DEU 2022	West Af	3	2	Europe	DEU	Germany	B	Human	MPXV/Germany/2022/RKI129	2022	Homo sapiens	ON929084
ON929085	Wed Jun 26 18:51:23 CDT 2024	MPXV; 2; B_isolate MPXV/Germany/2022/RKI130	197139	ON929085	MPXV_ON929085	Virus_dsDNA_env; Poxviridae; Chordopoxvirinae; Orthopoxvirus; MPXV; 2; B	Monkeypox virus	Linear	ON929085 DEU 2022	West Af	3	2	Europe	DEU	Germany	B	Human	MPXV/Germany/2022/RKI130	2022	Homo sapiens	ON929085
ON929086	Wed Jun 26 18:51:23 CDT 2024	MPXV; 2; B_isolate MPXV/Germany/2022/RKI131	197140	ON929086	MPXV_ON929086	Virus_dsDNA_env; Poxviridae; Chordopoxvirinae; Orthopoxvirus; MPXV; 2; B	Monkeypox virus	Linear	ON929086 DEU 2022	West Af	3	2	Europe	DEU	Germany	B	Human	MPXV/Germany/2022/RKI131	2022	Homo sapiens	ON929086
ON929087	Wed Jun 26 18:51:23 CDT 2024	MPXV; 2; B_isolate MPXV/Germany/2022/RKI132	197140	ON929087	MPXV_ON929087	Virus_dsDNA_env; Poxviridae; Chordopoxvirinae; Orthopoxvirus; MPXV; 2; B	Monkeypox virus	Linear	ON929087 DEU 2022	West Af	3	2	Europe	DEU	Germany	B	Human	MPXV/Germany/2022/RKI132	2022	Homo sapiens	ON929087
ON929088	Wed Jun 26 18:51:23 CDT 2024	MPXV; 2; B_isolate MPXV/Germany/2022/RKI133	197139	ON929088	MPXV_ON929088	Virus_dsDNA_env; Poxviridae; Chordopoxvirinae; Orthopoxvirus; MPXV; 2; B	Monkeypox virus	Linear	ON929088 DEU 2022	West Af	3	2	Europe	DEU	Germany	B	Human	MPXV/Germany/2022/RKI133	2022	Homo sapiens	ON929088
ON929089	Wed Jun 26 18:51:23 CDT 2024	MPXV; 2; B_isolate MPXV/Germany/2022/RKI134	197140	ON929089	MPXV_ON929089	Virus_dsDNA_env; Poxviridae; Chordopoxvirinae; Orthopoxvirus; MPXV; 2; B	Monkeypox virus	Linear	ON929089 DEU 2022	West Af	3	2	Europe	DEU	Germany	B	Human	MPXV/Germany/2022/RKI134	2022	Homo sapiens	ON929089
ON929090	Wed Jun 26 18:51:23 CDT 2024	MPXV; 2; B_isolate MPXV/Germany/2022/RKI135	197141	ON929090	MPXV_ON929090	Virus_dsDNA_env; Poxviridae; Chordopoxvirinae; Orthopoxvirus; MPXV; 2; B	Monkeypox virus	Linear	ON929090 DEU 2022	West Af	3	2	Europe	DEU	Germany	B	Human	MPXV/Germany/2022/RKI135	2022	Homo sapiens	ON929090
ON929091	Wed Jun 26 18:51:23 CDT 2024	MPXV; 2; B_isolate MPXV/Germany/2022/RKI136	197139	ON929091	MPXV_ON929091	Virus_dsDNA_env; Poxviridae; Chordopoxvirinae; Orthopoxvirus; MPXV; 2; B	Monkeypox virus	Linear	ON929091 DEU 2022	West Af	3	2	Europe	DEU	Germany	B	Human	MPXV/Germany/2022/RKI136	2022	Homo sapiens	ON929091
ON954773	Wed Jun 26 18:51:23 CDT 2024	MPXV; 2; B_isolate MPXV_USA_2022_CA002	197767	ON954773	MPXV_ON954773	Virus_dsDNA_env; Poxviridae; Chordopoxvirinae; Orthopoxvirus; MPXV; 2; B	Monkeypox virus	Linear	ON954773 USA 2022	West Af	3	2	N America	USA	USA: CA	B	Human	MPXV_USA_2022_CA002	2022	Homo sapiens	ON954773
ON959131	Wed Jun 26 18:51:23 CDT 2024	MPXV; 2; B_isolate MPXV_USA_2022_IL001	197742	ON959131	MPXV_ON959131	Virus_dsDNA_env; Poxviridae; Chordopoxvirinae; Orthopoxvirus; MPXV; 2; B	Monkeypox virus	Linear	ON959131 USA 2022	West Af	3	2	N America	USA	USA: IL	B	Human	MPXV_USA_2022_IL001	2022	Homo sapiens	ON959131
ON959132	Wed Jun 26 18:51:23 CDT 2024	MPXV; 2; B_isolate MPXV_USA_2022_IL003	197758	ON959132	MPXV_ON959132	Virus_dsDNA_env; Poxviridae; Chordopoxvirinae; Orthopoxvirus; MPXV; 2; B	Monkeypox virus	Linear	ON959132 USA 2022	West Af	3	2	N America	USA	USA: IL	B	Human	MPXV_USA_2022_IL003	2022	Homo sapiens	ON959132
ON959133	Wed Jun 26 18:51:23 CDT 2024	MPXV; 2; B_isolate MPXV_USA_2022_NY002	197771	ON959133	MPXV_ON959133	Virus_dsDNA_env; Poxviridae; Chordopoxvirinae; Orthopoxvirus; MPXV; 2; B	Monkeypox virus	Linear	ON959133 USA 2022	West Af	3	2	N America	USA	USA: NY	B	Human	MPXV_USA_2022_NY002	2022	Homo sapiens	ON959133
ON959134	Wed Jun 26 18:51:23 CDT 2024	MPXV; 2; B_isolate MPXV_USA_2022_NY003	197742	ON959134	MPXV_ON959134	Virus_dsDNA_env; Poxviridae; Chordopoxvirinae; Orthopoxvirus; MPXV; 2; B	Monkeypox virus	Linear	ON959134 USA 2022	West Af	3	2	N America	USA	USA: NY	B	Human	MPXV_USA_2022_NY003	2022	Homo sapiens	ON959134
ON959135	Wed Jun 26 18:51:23 CDT 2024	MPXV; 2; B_isolate MPXV_USA_2022_NY004	197764	ON959135	MPXV_ON959135	Virus_dsDNA_env; Poxviridae; Chordopoxvirinae; Orthopoxvirus; MPXV; 2; B	Monkeypox virus	Linear	ON959135 USA 2022	West Af	3	2	N America	USA	USA: NY	B	Human	MPXV_USA_2022_NY004	2022	Homo sapiens	ON959135
ON959136	Wed Jun 26 18:51:23 CDT 2024	MPXV; 2; B_isolate MPXV_USA_2022_NY005	197794	ON959136	MPXV_ON959136	Virus_dsDNA_env; Poxviridae; Chordopoxvirinae; Orthopoxvirus; MPXV; 2; B	Monkeypox virus	Linear	ON959136 USA 2022	West Af	3	2	N America	USA	USA: NY	B	Human	MPXV_USA_2022_NY005	2022	Homo sapiens	ON959136
ON959143	Wed Jun 26 18:51:23 CDT 2024	MPXV; 2; B_isolate MPX-96/Finland/2022	197195	ON959143	MPXV_ON959143	Virus_dsDNA_env; Poxviridae; Chordopoxvirinae; Orthopoxvirus; MPXV; 2; B	Monkeypox virus	Linear	ON959143 FIN 2022	West Af	3	2	Europe	FIN	Finland	B	Human	MPX-96/Finland/2022	2022	Homo sapiens	ON959143
ON959149	Wed Jun 26 18:51:23 CDT 2024	MPXV; 2; B_isolate MPXV/Germany/2022/RKI140	197139	ON959149	MPXV_ON959149	Virus_dsDNA_env; Poxviridae; Chordopoxvirinae; Orthopoxvirus; MPXV; 2; B	Monkeypox virus	Linear	ON959149 DEU 2022	West Af	3	2	Europe	DEU	Germany	B	Human	MPXV/Germany/2022/RKI140	2022	Homo sapiens	ON959149
ON959150	Wed Jun 26 18:51:23 CDT 2024	MPXV; 2; B_isolate MPXV/Germany/2022/RKI145	197139	ON959150	MPXV_ON959150	Virus_dsDNA_env; Poxviridae; Chordopoxvirinae; Orthopoxvirus; MPXV; 2; B	Monkeypox virus	Linear	ON959150 DEU 2022	West Af	3	2	Europe	DEU	Germany	B	Human	MPXV/Germany/2022/RKI145	2022	Homo sapiens	ON959150
ON959151	Wed Jun 26 18:51:23 CDT 2024	MPXV; 2; B_isolate MPXV/Germany/2022/RKI160	197139	ON959151	MPXV_ON959151	Virus_dsDNA_env; Poxviridae; Chordopoxvirinae; Orthopoxvirus; MPXV; 2; B	Monkeypox virus	Linear	ON959151 DEU 2022	West Af	3	2	Europe	DEU	Germany	B	Human	MPXV/Germany/2022/RKI160	2022	Homo sapiens	ON959151
ON959152	Wed Jun 26 18:51:23 CDT 2024	MPXV; 2; B_isolate MPXV/Germany/2022/RKI139	197139	ON959152	MPXV_ON959152	Virus_dsDNA_env; Poxviridae; Chordopoxvirinae; Orthopoxvirus; MPXV; 2; B	Monkeypox virus	Linear	ON959152 DEU 2022	West Af	3	2	Europe	DEU	Germany	B	Human	MPXV/Germany/2022/RKI139	2022	Homo sapiens	ON959152
ON959153	Wed Jun 26 18:51:23 CDT 2024	MPXV; 2; B_isolate MPXV/Germany/2022/RKI165	197139	ON959153	MPXV_ON959153	Virus_dsDNA_env; Poxviridae; Chordopoxvirinae; Orthopoxvirus; MPXV; 2; B	Monkeypox virus	Linear	ON959153 DEU 2022	West Af	3	2	Europe	DEU	Germany	B	Human	MPXV/Germany/2022/RKI165	2022	Homo sapiens	ON959153
ON959154	Wed Jun 26 18:51:23 CDT 2024	MPXV; 2; B_isolate MPXV/Germany/2022/RKI137	197139	ON959154	MPXV_ON959154	Virus_dsDNA_env; Poxviridae; Chordopoxvirinae; Orthopoxvirus; MPXV; 2; B	Monkeypox virus	Linear	ON959154 DEU 2022	West Af	3	2	Europe	DEU	Germany	B	Human	MPXV/Germany/2022/RKI137	2022	Homo sapiens	ON959154
ON959155	Wed Jun 26 18:51:23 CDT 2024	MPXV; 2; B_isolate MPXV/Germany/2022/RKI138	197139	ON959155	MPXV_ON959155	Virus_dsDNA_env; Poxviridae; Chordopoxvirinae; Orthopoxvirus; MPXV; 2; B	Monkeypox virus	Linear	ON959155 DEU 2022	West Af	3	2	Europe	DEU	Germany	B	Human	MPXV/Germany/2022/RKI138	2022	Homo sapiens	ON959155
ON959156	Wed Jun 26 18:51:23 CDT 2024	MPXV; 2; B_isolate MPXV/Germany/2022/RKI141	197139	ON959156	MPXV_ON959156	Virus_dsDNA_env; Poxviridae; Chordopoxvirinae; Orthopoxvirus; MPXV; 2; B	Monkeypox virus	Linear	ON959156 DEU 2022	West Af	3	2	Europe	DEU	Germany	B	Human	MPXV/Germany/2022/RKI141	2022	Homo sapiens	ON959156
ON959157	Wed Jun 26 18:51:23 CDT 2024	MPXV; 2; B_isolate MPXV/Germany/2022/RKI142	197139	ON959157	MPXV_ON959157	Virus_dsDNA_env; Poxviridae; Chordopoxvirinae; Orthopoxvirus; MPXV; 2; B	Monkeypox virus	Linear	ON959157 DEU 2022	West Af	3	2	Europe	DEU	Germany	B	Human	MPXV/Germany/2022/RKI142	2022	Homo sapiens	ON959157
ON959158	Wed Jun 26 18:51:23 CDT 2024	MPXV; 2; B_isolate MPXV/Germany/2022/RKI143	197139	ON959158	MPXV_ON959158	Virus_dsDNA_env; Poxviridae; Chordopoxvirinae; Orthopoxvirus; MPXV; 2; B	Monkeypox virus	Linear	ON959158 DEU 2022	West Af	3	2	Europe	DEU	Germany	B	Human	MPXV/Germany/2022/RKI143	2022	Homo sapiens	ON959158
ON959159	Wed Jun 26 18:51:23 CDT 2024	MPXV; 2; B_isolate MPXV/Germany/2022/RKI144	197139	ON959159	MPXV_ON959159	Virus_dsDNA_env; Poxviridae; Chordopoxvirinae; Orthopoxvirus; MPXV; 2; B	Monkeypox virus	Linear	ON959159 DEU 2022	West Af	3	2	Europe	DEU	Germany	B	Human	MPXV/Germany/2022/RKI144	2022	Homo sapiens	ON959159
ON959160	Wed Jun 26 18:51:23 CDT 2024	MPXV; 2; B_isolate MPXV/Germany/2022/RKI146	197139	ON959160	MPXV_ON959160	Virus_dsDNA_env; Poxviridae; Chordopoxvirinae; Orthopoxvirus; MPXV; 2; B	Monkeypox virus	Linear	ON959160 DEU 2022	West Af	3	2	Europe	DEU	Germany	B	Human	MPXV/Germany/2022/RKI146	2022	Homo sapiens	ON959160
ON959161	Wed Jun 26 18:51:23 CDT 2024	MPXV; 2; B_isolate MPXV/Germany/2022/RKI147	197139	ON959161	MPXV_ON959161	Virus_dsDNA_env; Poxviridae; Chordopoxvirinae; Orthopoxvirus; MPXV; 2; B	Monkeypox virus	Linear	ON959161 DEU 2022	West Af	3	2	Europe	DEU	Germany	B	Human	MPXV/Germany/2022/RKI147	2022	Homo sapiens	ON959161
ON959162	Wed Jun 26 18:51:23 CDT 2024	MPXV; 2; B_isolate MPXV/Germany/2022/RKI148	197137	ON959162	MPXV_ON959162	Virus_dsDNA_env; Poxviridae; Chordopoxvirinae; Orthopoxvirus; MPXV; 2; B	Monkeypox virus	Linear	ON959162 DEU 2022	West Af	3	2	Europe	DEU	Germany	B	Human	MPXV/Germany/2022/RKI148	2022	Homo sapiens	ON959162
ON959163	Wed Jun 26 18:51:23 CDT 2024	MPXV; 2; B_isolate MPXV/Germany/2022/RKI149	197139	ON959163	MPXV_ON959163	Virus_dsDNA_env; Poxviridae; Chordopoxvirinae; Orthopoxvirus; MPXV; 2; B	Monkeypox virus	Linear	ON959163 DEU 2022	West Af	3	2	Europe	DEU	Germany	B	Human	MPXV/Germany/2022/RKI149	2022	Homo sapiens	ON959163
ON959164	Wed Jun 26 18:51:23 CDT 2024	MPXV; 2; B_isolate MPXV/Germany/2022/RKI150	197137	ON959164	MPXV_ON959164	Virus_dsDNA_env; Poxviridae; Chordopoxvirinae; Orthopoxvirus; MPXV; 2; B	Monkeypox virus	Linear	ON959164 DEU 2022	West Af	3	2	Europe	DEU	Germany	B	Human	MPXV/Germany/2022/RKI150	2022	Homo sapiens	ON959164
ON959165	Wed Jun 26 18:51:23 CDT 2024	MPXV; 2; B_isolate MPXV/Germany/2022/RKI151	197139	ON959165	MPXV_ON959165	Virus_dsDNA_env; Poxviridae; Chordopoxvirinae; Orthopoxvirus; MPXV; 2; B	Monkeypox virus	Linear	ON959165 DEU 2022	West Af	3	2	Europe	DEU	Germany	B	Human	MPXV/Germany/2022/RKI151	2022	Homo sapiens	ON959165
ON959166	Wed Jun 26 18:51:23 CDT 2024	MPXV; 2; B_isolate MPXV/Germany/2022/RKI152	197139	ON959166	MPXV_ON959166	Virus_dsDNA_env; Poxviridae; Chordopoxvirinae; Orthopoxvirus; MPXV; 2; B	Monkeypox virus	Linear	ON959166 DEU 2022	West Af	3	2	Europe	DEU	Germany	B	Human	MPXV/Germany/2022/RKI152	2022	Homo sapiens	ON959166
ON959167	Wed Jun 26 18:51:23 CDT 2024	MPXV; 2; B_isolate MPXV/Germany/2022/RKI153	197139	ON959167	MPXV_ON959167	Virus_dsDNA_env; Poxviridae; Chordopoxvirinae; Orthopoxvirus; MPXV; 2; B	Monkeypox virus	Linear	ON959167 DEU 2022	West Af	3	2	Europe	DEU	Germany	B	Human	MPXV/Germany/2022/RKI153	2022	Homo sapiens	ON959167
ON959168	Wed Jun 26 18:51:23 CDT 2024	MPXV; 2; B_isolate MPXV/Germany/2022/RKI154	197139	ON959168	MPXV_ON959168	Virus_dsDNA_env; Poxviridae; Chordopoxvirinae; Orthopoxvirus; MPXV; 2; B	Monkeypox virus	Linear	ON959168 DEU 2022	West Af	3	2	Europe	DEU	Germany	B	Human	MPXV/Germany/2022/RKI154	2022	Homo sapiens	ON959168
ON959169	Wed Jun 26 18:51:23 CDT 2024	MPXV; 2; B_isolate MPXV/Germany/2022/RKI155	197139	ON959169	MPXV_ON959169	Virus_dsDNA_env; Poxviridae; Chordopoxvirinae; Orthopoxvirus; MPXV; 2; B	Monkeypox virus	Linear	ON959169 DEU 2022	West Af	3	2	Europe	DEU	Germany	B	Human	MPXV/Germany/2022/RKI155	2022	Homo sapiens	ON959169
ON959170	Wed Jun 26 18:51:23 CDT 2024	MPXV; 2; B_isolate MPXV/Germany/2022/RKI156	197139	ON959170	MPXV_ON959170	Virus_dsDNA_env; Poxviridae; Chordopoxvirinae; Orthopoxvirus; MPXV; 2; B	Monkeypox virus	Linear	ON959170 DEU 2022	West Af	3	2	Europe	DEU	Germany	B	Human	MPXV/Germany/2022/RKI156	2022	Homo sapiens	ON959170
ON959171	Wed Jun 26 18:51:23 CDT 2024	MPXV; 2; B_isolate MPXV/Germany/2022/RKI157	197139	ON959171	MPXV_ON959171	Virus_dsDNA_env; Poxviridae; Chordopoxvirinae; Orthopoxvirus; MPXV; 2; B	Monkeypox virus	Linear	ON959171 DEU 2022	West Af	3	2	Europe	DEU	Germany	B	Human	MPXV/Germany/2022/RKI157	2022	Homo sapiens	ON959171
ON959172	Wed Jun 26 18:51:23 CDT 2024	MPXV; 2; B_isolate MPXV/Germany/2022/RKI158	197139	ON959172	MPXV_ON959172	Virus_dsDNA_env; Poxviridae; Chordopoxvirinae; Orthopoxvirus; MPXV; 2; B	Monkeypox virus	Linear	ON959172 DEU 2022	West Af	3	2	Europe	DEU	Germany	B	Human	MPXV/Germany/2022/RKI158	2022	Homo sapiens	ON959172
ON959173	Wed Jun 26 18:51:23 CDT 2024	MPXV; 2; B_isolate MPXV/Germany/2022/RKI159	197139	ON959173	MPXV_ON959173	Virus_dsDNA_env; Poxviridae; Chordopoxvirinae; Orthopoxvirus; MPXV; 2; B	Monkeypox virus	Linear	ON959173 DEU 2022	West Af	3	2	Europe	DEU	Germany	B	Human	MPXV/Germany/2022/RKI159	2022	Homo sapiens	ON959173
ON959174	Wed Jun 26 18:51:23 CDT 2024	MPXV; 2; B_isolate MPXV/Germany/2022/RKI161	197139	ON959174	MPXV_ON959174	Virus_dsDNA_env; Poxviridae; Chordopoxvirinae; Orthopoxvirus; MPXV; 2; B	Monkeypox virus	Linear	ON959174 DEU 2022	West Af	3	2	Europe	DEU	Germany	B	Human	MPXV/Germany/2022/RKI161	2022	Homo sapiens	ON959174
ON959175	Wed Jun 26 18:51:23 CDT 2024	MPXV; 2; B_isolate MPXV/Germany/2022/RKI162	197139	ON959175	MPXV_ON959175	Virus_dsDNA_env; Poxviridae; Chordopoxvirinae; Orthopoxvirus; MPXV; 2; B	Monkeypox virus	Linear	ON959175 DEU 2022	West Af	3	2	Europe	DEU	Germany	B	Human	MPXV/Germany/2022/RKI162	2022	Homo sapiens	ON959175
ON959176	Wed Jun 26 18:51:23 CDT 2024	MPXV; 2; B_isolate MPXV/Germany/2022/RKI163	197139	ON959176	MPXV_ON959176	Virus_dsDNA_env; Poxviridae; Chordopoxvirinae; Orthopoxvirus; MPXV; 2; B	Monkeypox virus	Linear	ON959176 DEU 2022	West Af	3	2	Europe	DEU	Germany	B	Human	MPXV/Germany/2022/RKI163	2022	Homo sapiens	ON959176
ON959177	Wed Jun 26 18:51:23 CDT 2024	MPXV; 2; B_isolate MPXV/Germany/2022/RKI164	197139	ON959177	MPXV_ON959177	Virus_dsDNA_env; Poxviridae; Chordopoxvirinae; Orthopoxvirus; MPXV; 2; B	Monkeypox virus	Linear	ON959177 DEU 2022	West Af	3	2	Europe	DEU	Germany	B	Human	MPXV/Germany/2022/RKI164	2022	Homo sapiens	ON959177
ON983160	Wed Jun 26 18:51:23 CDT 2024	MPXV; 2; B_isolate MPXV/CAN/UN-NML-3393/2022	197189	ON983160	MPXV_ON983160	Virus_dsDNA_env; Poxviridae; Chordopoxvirinae; Orthopoxvirus; MPXV; 2; B	Monkeypox virus	Linear	ON983160 CAN 2022	West Af	3	2	N America	CAN	Canada	B	Human	MPXV/CAN/UN-NML-3393/2022	2022	Homo sapiens	ON983160
ON983162	Wed Jun 26 18:51:23 CDT 2024	MPXV; 2; B_isolate MPXV/CAN/UN-NML-3531/2022	197194	ON983162	MPXV_ON983162	Virus_dsDNA_env; Poxviridae; Chordopoxvirinae; Orthopoxvirus; MPXV; 2; B	Monkeypox virus	Linear	ON983162 CAN 2022	West Af	3	2	N America	CAN	Canada	B	Human	MPXV/CAN/UN-NML-3531/2022	2022	Homo sapiens	ON983162
ON983163	Wed Jun 26 18:51:23 CDT 2024	MPXV; 2; B_isolate MPXV/CAN/UN-NML-3532/2022	197195	ON983163	MPXV_ON983163	Virus_dsDNA_env; Poxviridae; Chordopoxvirinae; Orthopoxvirus; MPXV; 2; B	Monkeypox virus	Linear	ON983163 CAN 2022	West Af	3	2	N America	CAN	Canada	B	Human	MPXV/CAN/UN-NML-3532/2022	2022	Homo sapiens	ON983163
ON983166	Wed Jun 26 18:51:23 CDT 2024	MPXV; 2; B_isolate MPXV/CAN/UN-NML-3702/2022	197192	ON983166	MPXV_ON983166	Virus_dsDNA_env; Poxviridae; Chordopoxvirinae; Orthopoxvirus; MPXV; 2; B	Monkeypox virus	Linear	ON983166 CAN 2022	West Af	3	2	N America	CAN	Canada	B	Human	MPXV/CAN/UN-NML-3702/2022	2022	Homo sapiens	ON983166
ON983167	Wed Jun 26 18:51:23 CDT 2024	MPXV; 2; B_isolate MPXV/CAN/UN-NML-3725/2022	197195	ON983167	MPXV_ON983167	Virus_dsDNA_env; Poxviridae; Chordopoxvirinae; Orthopoxvirus; MPXV; 2; B	Monkeypox virus	Linear	ON983167 CAN 2022	West Af	3	2	N America	CAN	Canada	B	Human	MPXV/CAN/UN-NML-3725/2022	2022	Homo sapiens	ON983167
ON983168	Wed Jun 26 18:51:23 CDT 2024	MPXV; 2; B_isolate MPxV/Prague_001/2022/flye_medaka	194916	ON983168	MPXV_ON983168	Virus_dsDNA_env; Poxviridae; Chordopoxvirinae; Orthopoxvirus; MPXV; 2; B	Monkeypox virus	Linear	ON983168 CZE 2022	West Af	3	2	Europe	CZE	Czech Republic	B	Human	MPxV/Prague_001/2022/flye_medaka	2022	Homo sapiens	ON983168
OP012849	Wed Jun 26 18:51:23 CDT 2024	MPXV; 2; B_isolate MPXV/Taiwan/110-364682/2022	197196	OP012849	MPXV_OP012849	Virus_dsDNA_env; Poxviridae; Chordopoxvirinae; Orthopoxvirus; MPXV; 2; B	Monkeypox virus	Linear	OP012849 TWN 2022	West Af	3	2	Asia	TWN	Taiwan	B	Human	MPXV/Taiwan/110-364682/2022	2022	Homo sapiens	OP012849
OP013004	Wed Jun 26 18:51:23 CDT 2024	MPXV; 2; B_isolate MPXV/CAN/UN-NML-3518/2022	197195	OP013004	MPXV_OP013004	Virus_dsDNA_env; Poxviridae; Chordopoxvirinae; Orthopoxvirus; MPXV; 2; B	Monkeypox virus	Linear	OP013004 CAN 2022	West Af	3	2	N America	CAN	Canada	B	Human	MPXV/CAN/UN-NML-3518/2022	2022	Homo sapiens	OP013004
OP013005	Wed Jun 26 18:51:23 CDT 2024	MPXV; 2; B_isolate MPXV/CAN/UN-NML-3519/2022	197195	OP013005	MPXV_OP013005	Virus_dsDNA_env; Poxviridae; Chordopoxvirinae; Orthopoxvirus; MPXV; 2; B	Monkeypox virus	Linear	OP013005 CAN 2022	West Af	3	2	N America	CAN	Canada	B	Human	MPXV/CAN/UN-NML-3519/2022	2022	Homo sapiens	OP013005
OP013006	Wed Jun 26 18:51:23 CDT 2024	MPXV; 2; B_isolate MPXV/CAN/UN-NML-3542/2022	197198	OP013006	MPXV_OP013006	Virus_dsDNA_env; Poxviridae; Chordopoxvirinae; Orthopoxvirus; MPXV; 2; B	Monkeypox virus	Linear	OP013006 CAN 2022	West Af	3	2	N America	CAN	Canada	B	Human	MPXV/CAN/UN-NML-3542/2022	2022	Homo sapiens	OP013006
OP013007	Wed Jun 26 18:51:23 CDT 2024	MPXV; 2; B_isolate MPXV/CAN/UN-NML-3549/2022	197197	OP013007	MPXV_OP013007	Virus_dsDNA_env; Poxviridae; Chordopoxvirinae; Orthopoxvirus; MPXV; 2; B	Monkeypox virus	Linear	OP013007 CAN 2022	West Af	3	2	N America	CAN	Canada	B	Human	MPXV/CAN/UN-NML-3549/2022	2022	Homo sapiens	OP013007
OP013008	Wed Jun 26 18:51:23 CDT 2024	MPXV; 2; B_isolate MPXV/CAN/UN-NML-3582/2022	197195	OP013008	MPXV_OP013008	Virus_dsDNA_env; Poxviridae; Chordopoxvirinae; Orthopoxvirus; MPXV; 2; B	Monkeypox virus	Linear	OP013008 CAN 2022	West Af	3	2	N America	CAN	Canada	B	Human	MPXV/CAN/UN-NML-3582/2022	2022	Homo sapiens	OP013008
OP013009	Wed Jun 26 18:51:23 CDT 2024	MPXV; 2; B_isolate MPXV/CAN/UN-NML-3595/2022	197195	OP013009	MPXV_OP013009	Virus_dsDNA_env; Poxviridae; Chordopoxvirinae; Orthopoxvirus; MPXV; 2; B	Monkeypox virus	Linear	OP013009 CAN 2022	West Af	3	2	N America	CAN	Canada	B	Human	MPXV/CAN/UN-NML-3595/2022	2022	Homo sapiens	OP013009
OP013010	Wed Jun 26 18:51:23 CDT 2024	MPXV; 2; B_isolate MPXV/CAN/UN-NML-3607/2022	197195	OP013010	MPXV_OP013010	Virus_dsDNA_env; Poxviridae; Chordopoxvirinae; Orthopoxvirus; MPXV; 2; B	Monkeypox virus	Linear	OP013010 CAN 2022	West Af	3	2	N America	CAN	Canada	B	Human	MPXV/CAN/UN-NML-3607/2022	2022	Homo sapiens	OP013010
OP013011	Wed Jun 26 18:51:23 CDT 2024	MPXV; 2; B_isolate MPXV/CAN/UN-NML-3611/2022	197193	OP013011	MPXV_OP013011	Virus_dsDNA_env; Poxviridae; Chordopoxvirinae; Orthopoxvirus; MPXV; 2; B	Monkeypox virus	Linear	OP013011 CAN 2022	West Af	3	2	N America	CAN	Canada	B	Human	MPXV/CAN/UN-NML-3611/2022	2022	Homo sapiens	OP013011
OP013013	Wed Jun 26 18:51:23 CDT 2024	MPXV; 2; B_isolate MPXV/CAN/UN-NML-3658/2022	197195	OP013013	MPXV_OP013013	Virus_dsDNA_env; Poxviridae; Chordopoxvirinae; Orthopoxvirus; MPXV; 2; B	Monkeypox virus	Linear	OP013013 CAN 2022	West Af	3	2	N America	CAN	Canada	B	Human	MPXV/CAN/UN-NML-3658/2022	2022	Homo sapiens	OP013013
OP013014	Wed Jun 26 18:51:23 CDT 2024	MPXV; 2; B_isolate MPXV/CAN/UN-NML-3672/2022	197195	OP013014	MPXV_OP013014	Virus_dsDNA_env; Poxviridae; Chordopoxvirinae; Orthopoxvirus; MPXV; 2; B	Monkeypox virus	Linear	OP013014 CAN 2022	West Af	3	2	N America	CAN	Canada	B	Human	MPXV/CAN/UN-NML-3672/2022	2022	Homo sapiens	OP013014
OP013015	Wed Jun 26 18:51:23 CDT 2024	MPXV; 2; B_isolate MPXV/CAN/UN-NML-3674/2022	197195	OP013015	MPXV_OP013015	Virus_dsDNA_env; Poxviridae; Chordopoxvirinae; Orthopoxvirus; MPXV; 2; B	Monkeypox virus	Linear	OP013015 CAN 2022	West Af	3	2	N America	CAN	Canada	B	Human	MPXV/CAN/UN-NML-3674/2022	2022	Homo sapiens	OP013015
OP018588	Wed Jun 26 18:51:23 CDT 2024	MPXV; 2; B_isolate MPXV/Germany/2022/RKI169	197140	OP018588	MPXV_OP018588	Virus_dsDNA_env; Poxviridae; Chordopoxvirinae; Orthopoxvirus; MPXV; 2; B	Monkeypox virus	Linear	OP018588 DEU 2022	West Af	3	2	Europe	DEU	Germany	B	Human	MPXV/Germany/2022/RKI169	2022	Homo sapiens	OP018588
OP018589	Wed Jun 26 18:51:23 CDT 2024	MPXV; 2; B_isolate MPXV/Germany/2022/RKI180	197140	OP018589	MPXV_OP018589	Virus_dsDNA_env; Poxviridae; Chordopoxvirinae; Orthopoxvirus; MPXV; 2; B	Monkeypox virus	Linear	OP018589 DEU 2022	West Af	3	2	Europe	DEU	Germany	B	Human	MPXV/Germany/2022/RKI180	2022	Homo sapiens	OP018589
OP018590	Wed Jun 26 18:51:23 CDT 2024	MPXV; 2; B_isolate MPXV/Germany/2022/RKI181	197140	OP018590	MPXV_OP018590	Virus_dsDNA_env; Poxviridae; Chordopoxvirinae; Orthopoxvirus; MPXV; 2; B	Monkeypox virus	Linear	OP018590 DEU 2022	West Af	3	2	Europe	DEU	Germany	B	Human	MPXV/Germany/2022/RKI181	2022	Homo sapiens	OP018590
OP018591	Wed Jun 26 18:51:23 CDT 2024	MPXV; 2; B_isolate MPXV/Germany/2022/RKI183	197139	OP018591	MPXV_OP018591	Virus_dsDNA_env; Poxviridae; Chordopoxvirinae; Orthopoxvirus; MPXV; 2; B	Monkeypox virus	Linear	OP018591 DEU 2022	West Af	3	2	Europe	DEU	Germany	B	Human	MPXV/Germany/2022/RKI183	2022	Homo sapiens	OP018591
OP018592	Wed Jun 26 18:51:23 CDT 2024	MPXV; 2; B_isolate MPXV/Germany/2022/RKI166	197140	OP018592	MPXV_OP018592	Virus_dsDNA_env; Poxviridae; Chordopoxvirinae; Orthopoxvirus; MPXV; 2; B	Monkeypox virus	Linear	OP018592 DEU 2022	West Af	3	2	Europe	DEU	Germany	B	Human	MPXV/Germany/2022/RKI166	2022	Homo sapiens	OP018592
OP018593	Wed Jun 26 18:51:23 CDT 2024	MPXV; 2; B_isolate MPXV/Germany/2022/RKI167	197140	OP018593	MPXV_OP018593	Virus_dsDNA_env; Poxviridae; Chordopoxvirinae; Orthopoxvirus; MPXV; 2; B	Monkeypox virus	Linear	OP018593 DEU 2022	West Af	3	2	Europe	DEU	Germany	B	Human	MPXV/Germany/2022/RKI167	2022	Homo sapiens	OP018593
OP018594	Wed Jun 26 18:51:23 CDT 2024	MPXV; 2; B_isolate MPXV/Germany/2022/RKI168	197140	OP018594	MPXV_OP018594	Virus_dsDNA_env; Poxviridae; Chordopoxvirinae; Orthopoxvirus; MPXV; 2; B	Monkeypox virus	Linear	OP018594 DEU 2022	West Af	3	2	Europe	DEU	Germany	B	Human	MPXV/Germany/2022/RKI168	2022	Homo sapiens	OP018594
OP018595	Wed Jun 26 18:51:23 CDT 2024	MPXV; 2; B_isolate MPXV/Germany/2022/RKI170	197140	OP018595	MPXV_OP018595	Virus_dsDNA_env; Poxviridae; Chordopoxvirinae; Orthopoxvirus; MPXV; 2; B	Monkeypox virus	Linear	OP018595 DEU 2022	West Af	3	2	Europe	DEU	Germany	B	Human	MPXV/Germany/2022/RKI170	2022	Homo sapiens	OP018595
OP018596	Wed Jun 26 18:51:23 CDT 2024	MPXV; 2; B_isolate MPXV/Germany/2022/RKI171	197140	OP018596	MPXV_OP018596	Virus_dsDNA_env; Poxviridae; Chordopoxvirinae; Orthopoxvirus; MPXV; 2; B	Monkeypox virus	Linear	OP018596 DEU 2022	West Af	3	2	Europe	DEU	Germany	B	Human	MPXV/Germany/2022/RKI171	2022	Homo sapiens	OP018596
OP018597	Wed Jun 26 18:51:23 CDT 2024	MPXV; 2; B_isolate MPXV/Germany/2022/RKI172	197139	OP018597	MPXV_OP018597	Virus_dsDNA_env; Poxviridae; Chordopoxvirinae; Orthopoxvirus; MPXV; 2; B	Monkeypox virus	Linear	OP018597 DEU 2022	West Af	3	2	Europe	DEU	Germany	B	Human	MPXV/Germany/2022/RKI172	2022	Homo sapiens	OP018597
OP018598	Wed Jun 26 18:51:23 CDT 2024	MPXV; 2; B_isolate MPXV/Germany/2022/RKI173	197140	OP018598	MPXV_OP018598	Virus_dsDNA_env; Poxviridae; Chordopoxvirinae; Orthopoxvirus; MPXV; 2; B	Monkeypox virus	Linear	OP018598 DEU 2022	West Af	3	2	Europe	DEU	Germany	B	Human	MPXV/Germany/2022/RKI173	2022	Homo sapiens	OP018598
OP018600	Wed Jun 26 18:51:23 CDT 2024	MPXV; 2; B_isolate MPXV/Germany/2022/RKI175	197141	OP018600	MPXV_OP018600	Virus_dsDNA_env; Poxviridae; Chordopoxvirinae; Orthopoxvirus; MPXV; 2; B	Monkeypox virus	Linear	OP018600 DEU 2022	West Af	3	2	Europe	DEU	Germany	B	Human	MPXV/Germany/2022/RKI175	2022	Homo sapiens	OP018600
OP018601	Wed Jun 26 18:51:23 CDT 2024	MPXV; 2; B_isolate MPXV/Germany/2022/RKI176	197141	OP018601	MPXV_OP018601	Virus_dsDNA_env; Poxviridae; Chordopoxvirinae; Orthopoxvirus; MPXV; 2; B	Monkeypox virus	Linear	OP018601 DEU 2022	West Af	3	2	Europe	DEU	Germany	B	Human	MPXV/Germany/2022/RKI176	2022	Homo sapiens	OP018601
OP018602	Wed Jun 26 18:51:23 CDT 2024	MPXV; 2; B_isolate MPXV/Germany/2022/RKI177	197140	OP018602	MPXV_OP018602	Virus_dsDNA_env; Poxviridae; Chordopoxvirinae; Orthopoxvirus; MPXV; 2; B	Monkeypox virus	Linear	OP018602 DEU 2022	West Af	3	2	Europe	DEU	Germany	B	Human	MPXV/Germany/2022/RKI177	2022	Homo sapiens	OP018602
OP018603	Wed Jun 26 18:51:23 CDT 2024	MPXV; 2; B_isolate MPXV/Germany/2022/RKI178	197141	OP018603	MPXV_OP018603	Virus_dsDNA_env; Poxviridae; Chordopoxvirinae; Orthopoxvirus; MPXV; 2; B	Monkeypox virus	Linear	OP018603 DEU 2022	West Af	3	2	Europe	DEU	Germany	B	Human	MPXV/Germany/2022/RKI178	2022	Homo sapiens	OP018603
OP018604	Wed Jun 26 18:51:23 CDT 2024	MPXV; 2; B_isolate MPXV/Germany/2022/RKI179	197140	OP018604	MPXV_OP018604	Virus_dsDNA_env; Poxviridae; Chordopoxvirinae; Orthopoxvirus; MPXV; 2; B	Monkeypox virus	Linear	OP018604 DEU 2022	West Af	3	2	Europe	DEU	Germany	B	Human	MPXV/Germany/2022/RKI179	2022	Homo sapiens	OP018604
OP018605	Wed Jun 26 18:51:23 CDT 2024	MPXV; 2; B_isolate MPXV/Germany/2022/RKI182	197140	OP018605	MPXV_OP018605	Virus_dsDNA_env; Poxviridae; Chordopoxvirinae; Orthopoxvirus; MPXV; 2; B	Monkeypox virus	Linear	OP018605 DEU 2022	West Af	3	2	Europe	DEU	Germany	B	Human	MPXV/Germany/2022/RKI182	2022	Homo sapiens	OP018605
OP018606	Wed Jun 26 18:51:23 CDT 2024	MPXV; 2; B_isolate MPXV/Germany/2022/RKI184	197139	OP018606	MPXV_OP018606	Virus_dsDNA_env; Poxviridae; Chordopoxvirinae; Orthopoxvirus; MPXV; 2; B	Monkeypox virus	Linear	OP018606 DEU 2022	West Af	3	2	Europe	DEU	Germany	B	Human	MPXV/Germany/2022/RKI184	2022	Homo sapiens	OP018606
OP018607	Wed Jun 26 18:51:23 CDT 2024	MPXV; 2; B_isolate MPXV/Germany/2022/RKI185	197140	OP018607	MPXV_OP018607	Virus_dsDNA_env; Poxviridae; Chordopoxvirinae; Orthopoxvirus; MPXV; 2; B	Monkeypox virus	Linear	OP018607 DEU 2022	West Af	3	2	Europe	DEU	Germany	B	Human	MPXV/Germany/2022/RKI185	2022	Homo sapiens	OP018607
OP019275	Wed Jun 26 18:51:23 CDT 2024	MPXV; 2; B_isolate MPXV/Austria/MUW1525179/2022	197199	OP019275	MPXV_OP019275	Virus_dsDNA_env; Poxviridae; Chordopoxvirinae; Orthopoxvirus; MPXV; 2; B	Monkeypox virus	Linear	OP019275 AUT 2022	West Af	3	2	Europe	AUT	Austria	B	Human	MPXV/Austria/MUW1525179/2022	2022	Homo sapiens	OP019275
OP019276	Wed Jun 26 18:51:23 CDT 2024	MPXV; 2; B_isolate MPXV/Austria/MUW1527495/2022	197193	OP019276	MPXV_OP019276	Virus_dsDNA_env; Poxviridae; Chordopoxvirinae; Orthopoxvirus; MPXV; 2; B	Monkeypox virus	Linear	OP019276 AUT 2022	West Af	3	2	Europe	AUT	Austria	B	Human	MPXV/Austria/MUW1527495/2022	2022	Homo sapiens	OP019276
OP019277	Wed Jun 26 18:51:23 CDT 2024	MPXV; 2; B_isolate MPXV/Austria/MUW1531254/2022	197193	OP019277	MPXV_OP019277	Virus_dsDNA_env; Poxviridae; Chordopoxvirinae; Orthopoxvirus; MPXV; 2; B	Monkeypox virus	Linear	OP019277 AUT 2022	West Af	3	2	Europe	AUT	Austria	B	Human	MPXV/Austria/MUW1531254/2022	2022	Homo sapiens	OP019277
OP022170	Wed Jun 26 18:51:23 CDT 2024	MPXV; 2; B_isolate MPXV_UK_2022_5	197205	OP022170	MPXV_OP022170	Virus_dsDNA_env; Poxviridae; Chordopoxvirinae; Orthopoxvirus; MPXV; 2; B	Monkeypox virus	Linear	OP022170 GBR 2022	West Af	3	2	Europe	GBR	United Kingdom	B	Human	MPXV_UK_2022_5	2022	Homo sapiens	OP022170
OP055800	Wed Jun 26 18:51:23 CDT 2024	MPXV; 2; B_isolate MPXV/USA/WA-UW-073909/2022	197178	OP055800	MPXV_OP055800	Virus_dsDNA_env; Poxviridae; Chordopoxvirinae; Orthopoxvirus; MPXV; 2; B	Monkeypox virus	Linear	OP055800 USA 2022	West Af	3	2	N America	USA	USA: WA	B	Human	MPXV/USA/WA-UW-073909/2022	2022	Homo sapiens	OP055800
OP055801	Wed Jun 26 18:51:23 CDT 2024	MPXV; 2; B_isolate MPXV/USA/WA-UW-078327/2022	197176	OP055801	MPXV_OP055801	Virus_dsDNA_env; Poxviridae; Chordopoxvirinae; Orthopoxvirus; MPXV; 2; B	Monkeypox virus	Linear	OP055801 USA 2022	West Af	3	2	N America	USA	USA: WA	B	Human	MPXV/USA/WA-UW-078327/2022	2022	Homo sapiens	OP055801
OP055802	Wed Jun 26 18:51:23 CDT 2024	MPXV; 2; B_isolate MPXV/USA/Unknown-UW-077794/2022	197176	OP055802	MPXV_OP055802	Virus_dsDNA_env; Poxviridae; Chordopoxvirinae; Orthopoxvirus; MPXV; 2; B	Monkeypox virus	Linear	OP055802 USA 2022	West Af	3	2	N America	USA	USA: WA	B	Human	MPXV/USA/Unknown-UW-077794/2022	2022	Homo sapiens	OP055802
OP055803	Wed Jun 26 18:51:23 CDT 2024	MPXV; 2; B_isolate MPXV/USA/Unknown-UW-073599/2022	197176	OP055803	MPXV_OP055803	Virus_dsDNA_env; Poxviridae; Chordopoxvirinae; Orthopoxvirus; MPXV; 2; B	Monkeypox virus	Linear	OP055803 USA 2022	West Af	3	2	N America	USA	USA: WA	B	Human	MPXV/USA/Unknown-UW-073599/2022	2022	Homo sapiens	OP055803
OP055804	Wed Jun 26 18:51:23 CDT 2024	MPXV; 2; B_isolate MPXV/USA/WA-UW-076724/2022	197176	OP055804	MPXV_OP055804	Virus_dsDNA_env; Poxviridae; Chordopoxvirinae; Orthopoxvirus; MPXV; 2; B	Monkeypox virus	Linear	OP055804 USA 2022	West Af	3	2	N America	USA	USA: WA	B	Human	MPXV/USA/WA-UW-076724/2022	2022	Homo sapiens	OP055804
OP055805	Wed Jun 26 18:51:23 CDT 2024	MPXV; 2; B_isolate MPXV/USA/Unknown-UW-076991/2022	197176	OP055805	MPXV_OP055805	Virus_dsDNA_env; Poxviridae; Chordopoxvirinae; Orthopoxvirus; MPXV; 2; B	Monkeypox virus	Linear	OP055805 USA 2022	West Af	3	2	N America	USA	USA: WA	B	Human	MPXV/USA/Unknown-UW-076991/2022	2022	Homo sapiens	OP055805
OP055806	Wed Jun 26 18:51:23 CDT 2024	MPXV; 2; B_isolate MPXV/USA/WA-UW-079141/2022	197176	OP055806	MPXV_OP055806	Virus_dsDNA_env; Poxviridae; Chordopoxvirinae; Orthopoxvirus; MPXV; 2; B	Monkeypox virus	Linear	OP055806 USA 2022	West Af	3	2	N America	USA	USA: WA	B	Human	MPXV/USA/WA-UW-079141/2022	2022	Homo sapiens	OP055806
OP055807	Wed Jun 26 18:51:23 CDT 2024	MPXV; 2; B_isolate MPXV/USA/WA-UW-074372/2022	197176	OP055807	MPXV_OP055807	Virus_dsDNA_env; Poxviridae; Chordopoxvirinae; Orthopoxvirus; MPXV; 2; B	Monkeypox virus	Linear	OP055807 USA 2022	West Af	3	2	N America	USA	USA: WA	B	Human	MPXV/USA/WA-UW-074372/2022	2022	Homo sapiens	OP055807
OP055808	Wed Jun 26 18:51:23 CDT 2024	MPXV; 2; B_isolate MPXV/USA/WA-UW-075986/2022	197176	OP055808	MPXV_OP055808	Virus_dsDNA_env; Poxviridae; Chordopoxvirinae; Orthopoxvirus; MPXV; 2; B	Monkeypox virus	Linear	OP055808 USA 2022	West Af	3	2	N America	USA	USA: WA	B	Human	MPXV/USA/WA-UW-075986/2022	2022	Homo sapiens	OP055808
OP055809	Wed Jun 26 18:51:23 CDT 2024	MPXV; 2; B_isolate MPXV/USA/WA-UW-076082/2022	197177	OP055809	MPXV_OP055809	Virus_dsDNA_env; Poxviridae; Chordopoxvirinae; Orthopoxvirus; MPXV; 2; B	Monkeypox virus	Linear	OP055809 USA 2022	West Af	3	2	N America	USA	USA: WA	B	Human	MPXV/USA/WA-UW-076082/2022	2022	Homo sapiens	OP055809
OP062229	Wed Jun 26 18:51:23 CDT 2024	MPXV; 2; B_isolate MPXV/CAN/UN-NML-3817/2022	197176	OP062229	MPXV_OP062229	Virus_dsDNA_env; Poxviridae; Chordopoxvirinae; Orthopoxvirus; MPXV; 2; B	Monkeypox virus	Linear	OP062229 CAN 2022	West Af	3	2	N America	CAN	Canada	B	Human	MPXV/CAN/UN-NML-3817/2022	2022	Homo sapiens	OP062229
OP062231	Wed Jun 26 18:51:23 CDT 2024	MPXV; 2; B_isolate MPXV/CAN/UN-NML-3907/2022	197178	OP062231	MPXV_OP062231	Virus_dsDNA_env; Poxviridae; Chordopoxvirinae; Orthopoxvirus; MPXV; 2; B	Monkeypox virus	Linear	OP062231 CAN 2022	West Af	3	2	N America	CAN	Canada	B	Human	MPXV/CAN/UN-NML-3907/2022	2022	Homo sapiens	OP062231
OP062232	Wed Jun 26 18:51:23 CDT 2024	MPXV; 2; B_isolate MPXV/CAN/UN-NML-3909/2022	197177	OP062232	MPXV_OP062232	Virus_dsDNA_env; Poxviridae; Chordopoxvirinae; Orthopoxvirus; MPXV; 2; B	Monkeypox virus	Linear	OP062232 CAN 2022	West Af	3	2	N America	CAN	Canada	B	Human	MPXV/CAN/UN-NML-3909/2022	2022	Homo sapiens	OP062232
OP120937	Wed Jun 26 18:51:23 CDT 2024	MPXV; 2; B_isolate MP01CHUAC	197205	OP120937	MPXV_OP120937	Virus_dsDNA_env; Poxviridae; Chordopoxvirinae; Orthopoxvirus; MPXV; 2; B	Monkeypox virus	Linear	OP120937 ESP 2022	West Af	3	2	Europe	ESP	Spain	B	Human	MP01CHUAC	2022	Homo sapiens	OP120937
OP120938	Wed Jun 26 18:51:23 CDT 2024	MPXV; 2; B_isolate MP03CHUAC	197205	OP120938	MPXV_OP120938	Virus_dsDNA_env; Poxviridae; Chordopoxvirinae; Orthopoxvirus; MPXV; 2; B	Monkeypox virus	Linear	OP120938 ESP 2022	West Af	3	2	Europe	ESP	Spain	B	Human	MP03CHUAC	2022	Homo sapiens	OP120938
OP123040	Wed Jun 26 18:51:23 CDT 2024	MPXV; 2; B_isolate MPXV/USA/WA-UW-073974/2022	197174	OP123040	MPXV_OP123040	Virus_dsDNA_env; Poxviridae; Chordopoxvirinae; Orthopoxvirus; MPXV; 2; B	Monkeypox virus	Linear	OP123040 USA 2022	West Af	3	2	N America	USA	USA: WA	B	Human	MPXV/USA/WA-UW-073974/2022	2022	Homo sapiens	OP123040
OP123041	Wed Jun 26 18:51:23 CDT 2024	MPXV; 2; B_isolate MPXV/USA/WA-UW-070134/2022	197173	OP123041	MPXV_OP123041	Virus_dsDNA_env; Poxviridae; Chordopoxvirinae; Orthopoxvirus; MPXV; 2; B	Monkeypox virus	Linear	OP123041 USA 2022	West Af	3	2	N America	USA	USA: WA	B	Human	MPXV/USA/WA-UW-070134/2022	2022	Homo sapiens	OP123041
OP123042	Wed Jun 26 18:51:23 CDT 2024	MPXV; 2; B_isolate MPXV/USA/WA-UW-077622/2022	197176	OP123042	MPXV_OP123042	Virus_dsDNA_env; Poxviridae; Chordopoxvirinae; Orthopoxvirus; MPXV; 2; B	Monkeypox virus	Linear	OP123042 USA 2022	West Af	3	2	N America	USA	USA: WA	B	Human	MPXV/USA/WA-UW-077622/2022	2022	Homo sapiens	OP123042
OP123043	Wed Jun 26 18:51:23 CDT 2024	MPXV; 2; B_isolate MPXV/USA/WA-UW-077836/2022	197176	OP123043	MPXV_OP123043	Virus_dsDNA_env; Poxviridae; Chordopoxvirinae; Orthopoxvirus; MPXV; 2; B	Monkeypox virus	Linear	OP123043 USA 2022	West Af	3	2	N America	USA	USA: WA	B	Human	MPXV/USA/WA-UW-077836/2022	2022	Homo sapiens	OP123043
OP123044	Wed Jun 26 18:51:23 CDT 2024	MPXV; 2; B_isolate MPXV/USA/WA-UW-071246/2022	197176	OP123044	MPXV_OP123044	Virus_dsDNA_env; Poxviridae; Chordopoxvirinae; Orthopoxvirus; MPXV; 2; B	Monkeypox virus	Linear	OP123044 USA 2022	West Af	3	2	N America	USA	USA: WA	B	Human	MPXV/USA/WA-UW-071246/2022	2022	Homo sapiens	OP123044
OP123045	Wed Jun 26 18:51:23 CDT 2024	MPXV; 2; B_isolate MPXV/USA/WA-UW-076225/2022	197176	OP123045	MPXV_OP123045	Virus_dsDNA_env; Poxviridae; Chordopoxvirinae; Orthopoxvirus; MPXV; 2; B	Monkeypox virus	Linear	OP123045 USA 2022	West Af	3	2	N America	USA	USA: WA	B	Human	MPXV/USA/WA-UW-076225/2022	2022	Homo sapiens	OP123045
OP123046	Wed Jun 26 18:51:23 CDT 2024	MPXV; 2; B_isolate MPXV/USA/WA-UW-078870/2022	197174	OP123046	MPXV_OP123046	Virus_dsDNA_env; Poxviridae; Chordopoxvirinae; Orthopoxvirus; MPXV; 2; B	Monkeypox virus	Linear	OP123046 USA 2022	West Af	3	2	N America	USA	USA: WA	B	Human	MPXV/USA/WA-UW-078870/2022	2022	Homo sapiens	OP123046
OP123047	Wed Jun 26 18:51:23 CDT 2024	MPXV; 2; B_isolate MPXV/USA/WA-UW-071121/2022	197176	OP123047	MPXV_OP123047	Virus_dsDNA_env; Poxviridae; Chordopoxvirinae; Orthopoxvirus; MPXV; 2; B	Monkeypox virus	Linear	OP123047 USA 2022	West Af	3	2	N America	USA	USA: WA	B	Human	MPXV/USA/WA-UW-071121/2022	2022	Homo sapiens	OP123047
OP123048	Wed Jun 26 18:51:23 CDT 2024	MPXV; 2; B_isolate MPXV/USA/WA-UW-076861/2022	197176	OP123048	MPXV_OP123048	Virus_dsDNA_env; Poxviridae; Chordopoxvirinae; Orthopoxvirus; MPXV; 2; B	Monkeypox virus	Linear	OP123048 USA 2022	West Af	3	2	N America	USA	USA: WA	B	Human	MPXV/USA/WA-UW-076861/2022	2022	Homo sapiens	OP123048
OP123049	Wed Jun 26 18:51:23 CDT 2024	MPXV; 2; B_isolate MPXV/USA/WA-UW-073669/2022	197176	OP123049	MPXV_OP123049	Virus_dsDNA_env; Poxviridae; Chordopoxvirinae; Orthopoxvirus; MPXV; 2; B	Monkeypox virus	Linear	OP123049 USA 2022	West Af	3	2	N America	USA	USA: WA	B	Human	MPXV/USA/WA-UW-073669/2022	2022	Homo sapiens	OP123049
OP123050	Wed Jun 26 18:51:23 CDT 2024	MPXV; 2; B_isolate MPXV/USA/WA-UW-076854/2022	197176	OP123050	MPXV_OP123050	Virus_dsDNA_env; Poxviridae; Chordopoxvirinae; Orthopoxvirus; MPXV; 2; B	Monkeypox virus	Linear	OP123050 USA 2022	West Af	3	2	N America	USA	USA: WA	B	Human	MPXV/USA/WA-UW-076854/2022	2022	Homo sapiens	OP123050
OP123051	Wed Jun 26 18:51:23 CDT 2024	MPXV; 2; B_isolate MPXV/USA/OH-UW-070426/2022	197176	OP123051	MPXV_OP123051	Virus_dsDNA_env; Poxviridae; Chordopoxvirinae; Orthopoxvirus; MPXV; 2; B	Monkeypox virus	Linear	OP123051 USA 2022	West Af	3	2	N America	USA	USA: OH	B	Human	MPXV/USA/OH-UW-070426/2022	2022	Homo sapiens	OP123051
OP123052	Wed Jun 26 18:51:23 CDT 2024	MPXV; 2; B_isolate MPXV/USA/OH-UW-078654/2022	197176	OP123052	MPXV_OP123052	Virus_dsDNA_env; Poxviridae; Chordopoxvirinae; Orthopoxvirus; MPXV; 2; B	Monkeypox virus	Linear	OP123052 USA 2022	West Af	3	2	N America	USA	USA: OH	B	Human	MPXV/USA/OH-UW-078654/2022	2022	Homo sapiens	OP123052
OP123053	Wed Jun 26 18:51:23 CDT 2024	MPXV; 2; B_isolate MPXV/USA/OH-UW-071686/2022	197176	OP123053	MPXV_OP123053	Virus_dsDNA_env; Poxviridae; Chordopoxvirinae; Orthopoxvirus; MPXV; 2; B	Monkeypox virus	Linear	OP123053 USA 2022	West Af	3	2	N America	USA	USA: OH	B	Human	MPXV/USA/OH-UW-071686/2022	2022	Homo sapiens	OP123053
OP123054	Wed Jun 26 18:51:23 CDT 2024	MPXV; 2; B_isolate MPXV/USA/OH-UW-077163/2022	197176	OP123054	MPXV_OP123054	Virus_dsDNA_env; Poxviridae; Chordopoxvirinae; Orthopoxvirus; MPXV; 2; B	Monkeypox virus	Linear	OP123054 USA 2022	West Af	3	2	N America	USA	USA: OH	B	Human	MPXV/USA/OH-UW-077163/2022	2022	Homo sapiens	OP123054
OP123055	Wed Jun 26 18:51:23 CDT 2024	MPXV; 2; B_isolate MPXV/USA/OH-UW-070822/2022	197180	OP123055	MPXV_OP123055	Virus_dsDNA_env; Poxviridae; Chordopoxvirinae; Orthopoxvirus; MPXV; 2; B	Monkeypox virus	Linear	OP123055 USA 2022	West Af	3	2	N America	USA	USA: OH	B	Human	MPXV/USA/OH-UW-070822/2022	2022	Homo sapiens	OP123055
OP133004	Wed Jun 26 18:51:23 CDT 2024	MPXV; 2; B_isolate MPXV/Austria/MUW1533374/2022	197179	OP133004	MPXV_OP133004	Virus_dsDNA_env; Poxviridae; Chordopoxvirinae; Orthopoxvirus; MPXV; 2; B	Monkeypox virus	Linear	OP133004 AUT 2022	West Af	3	2	Europe	AUT	Austria	B	Human	MPXV/Austria/MUW1533374/2022	2022	Homo sapiens	OP133004
OP133005	Wed Jun 26 18:51:23 CDT 2024	MPXV; 2; B_isolate MPXV/Austria/MUW1531848/2022	197182	OP133005	MPXV_OP133005	Virus_dsDNA_env; Poxviridae; Chordopoxvirinae; Orthopoxvirus; MPXV; 2; B	Monkeypox virus	Linear	OP133005 AUT 2022	West Af	3	2	Europe	AUT	Austria	B	Human	MPXV/Austria/MUW1531848/2022	2022	Homo sapiens	OP133005
OP133006	Wed Jun 26 18:51:23 CDT 2024	MPXV; 2; B_isolate MPXV/Austria/MUW1532243/2022	197190	OP133006	MPXV_OP133006	Virus_dsDNA_env; Poxviridae; Chordopoxvirinae; Orthopoxvirus; MPXV; 2; B	Monkeypox virus	Linear	OP133006 AUT 2022	West Af	3	2	Europe	AUT	Austria	B	Human	MPXV/Austria/MUW1532243/2022	2022	Homo sapiens	OP133006
OP133007	Wed Jun 26 18:51:23 CDT 2024	MPXV; 2; B_isolate MPXV/Austria/MUW1536480/2022	197202	OP133007	MPXV_OP133007	Virus_dsDNA_env; Poxviridae; Chordopoxvirinae; Orthopoxvirus; MPXV; 2; B	Monkeypox virus	Linear	OP133007 AUT 2022	West Af	3	2	Europe	AUT	Austria	B	Human	MPXV/Austria/MUW1536480/2022	2022	Homo sapiens	OP133007
OP150923	Wed Jun 26 18:51:23 CDT 2024	MPXV; 2; B_isolate MPXV_USA_2022_CA007	197749	OP150923	MPXV_OP150923	Virus_dsDNA_env; Poxviridae; Chordopoxvirinae; Orthopoxvirus; MPXV; 2; B	Monkeypox virus	Linear	OP150923 USA 2022	West Af	3	2	N America	USA	USA: CA	B	Human	MPXV_USA_2022_CA007	2022	Homo sapiens	OP150923
OP150924	Wed Jun 26 18:51:23 CDT 2024	MPXV; 2; B_isolate MPXV_USA_2022_CA006	197776	OP150924	MPXV_OP150924	Virus_dsDNA_env; Poxviridae; Chordopoxvirinae; Orthopoxvirus; MPXV; 2; B	Monkeypox virus	Linear	OP150924 USA 2022	West Af	3	2	N America	USA	USA: CA	B	Human	MPXV_USA_2022_CA006	2022	Homo sapiens	OP150924
OP150925	Wed Jun 26 18:51:23 CDT 2024	MPXV; 2; B_isolate MPXV_USA_2022_GA001	197762	OP150925	MPXV_OP150925	Virus_dsDNA_env; Poxviridae; Chordopoxvirinae; Orthopoxvirus; MPXV; 2; B	Monkeypox virus	Linear	OP150925 USA 2022	West Af	3	2	N America	USA	USA: GA	B	Human	MPXV_USA_2022_GA001	2022	Homo sapiens	OP150925
OP150926	Wed Jun 26 18:51:23 CDT 2024	MPXV; 2; B_isolate MPXV_USA_2022_PA001	197692	OP150926	MPXV_OP150926	Virus_dsDNA_env; Poxviridae; Chordopoxvirinae; Orthopoxvirus; MPXV; 2; B	Monkeypox virus	Linear	OP150926 USA 2022	West Af	3	2	N America	USA	USA: PA	B	Human	MPXV_USA_2022_PA001	2022	Homo sapiens	OP150926
OP150927	Wed Jun 26 18:51:23 CDT 2024	MPXV; 2; B_isolate MPXV_USA_2022_WA001	197228	OP150927	MPXV_OP150927	Virus_dsDNA_env; Poxviridae; Chordopoxvirinae; Orthopoxvirus; MPXV; 2; B	Monkeypox virus	Linear	OP150927 USA 2022	West Af	3	2	N America	USA	USA: WA	B	Human	MPXV_USA_2022_WA001	2022	Homo sapiens	OP150927
OP160532	Wed Jun 26 18:51:23 CDT 2024	MPXV; 2; B_isolate MPXV/Netherlands/NH-AUMC-0001/2022	197008	OP160532	MPXV_OP160532	Virus_dsDNA_env; Poxviridae; Chordopoxvirinae; Orthopoxvirus; MPXV; 2; B	Monkeypox virus	Linear	OP160532 NLD 2022	West Af	3	2	Europe	NLD	Netherlands	B	Human	MPXV/Netherlands/NH-AUMC-0001/2022	2022	Homo sapiens	OP160532
OP169336	Wed Jun 26 18:51:23 CDT 2024	MPXV; 2; B_isolate MPXV/USA/WA-UW-070499/2022	197178	OP169336	MPXV_OP169336	Virus_dsDNA_env; Poxviridae; Chordopoxvirinae; Orthopoxvirus; MPXV; 2; B	Monkeypox virus	Linear	OP169336 USA 2022	West Af	3	2	N America	USA	USA: WA	B	Human	MPXV/USA/WA-UW-070499/2022	2022	Homo sapiens	OP169336
OP169337	Wed Jun 26 18:51:23 CDT 2024	MPXV; 2; B_isolate MPXV/USA/OH-UW-079847/2022	197176	OP169337	MPXV_OP169337	Virus_dsDNA_env; Poxviridae; Chordopoxvirinae; Orthopoxvirus; MPXV; 2; B	Monkeypox virus	Linear	OP169337 USA 2022	West Af	3	2	N America	USA	USA: OH	B	Human	MPXV/USA/OH-UW-079847/2022	2022	Homo sapiens	OP169337
OP169338	Wed Jun 26 18:51:23 CDT 2024	MPXV; 2; B_isolate MPXV/USA/OH-UW-074058/2022	197176	OP169338	MPXV_OP169338	Virus_dsDNA_env; Poxviridae; Chordopoxvirinae; Orthopoxvirus; MPXV; 2; B	Monkeypox virus	Linear	OP169338 USA 2022	West Af	3	2	N America	USA	USA: OH	B	Human	MPXV/USA/OH-UW-074058/2022	2022	Homo sapiens	OP169338
OP169339	Wed Jun 26 18:51:23 CDT 2024	MPXV; 2; B_isolate MPXV/USA/OH-UW-076485/2022	197168	OP169339	MPXV_OP169339	Virus_dsDNA_env; Poxviridae; Chordopoxvirinae; Orthopoxvirus; MPXV; 2; B	Monkeypox virus	Linear	OP169339 USA 2022	West Af	3	2	N America	USA	USA: OH	B	Human	MPXV/USA/OH-UW-076485/2022	2022	Homo sapiens	OP169339
OP169340	Wed Jun 26 18:51:23 CDT 2024	MPXV; 2; B_isolate MPXV/USA/WA-UW-074224/2022	197176	OP169340	MPXV_OP169340	Virus_dsDNA_env; Poxviridae; Chordopoxvirinae; Orthopoxvirus; MPXV; 2; B	Monkeypox virus	Linear	OP169340 USA 2022	West Af	3	2	N America	USA	USA: WA	B	Human	MPXV/USA/WA-UW-074224/2022	2022	Homo sapiens	OP169340
OP169341	Wed Jun 26 18:51:23 CDT 2024	MPXV; 2; B_isolate MPXV/USA/WA-UW-074184/2022	197178	OP169341	MPXV_OP169341	Virus_dsDNA_env; Poxviridae; Chordopoxvirinae; Orthopoxvirus; MPXV; 2; B	Monkeypox virus	Linear	OP169341 USA 2022	West Af	3	2	N America	USA	USA: WA	B	Human	MPXV/USA/WA-UW-074184/2022	2022	Homo sapiens	OP169341
OP169342	Wed Jun 26 18:51:23 CDT 2024	MPXV; 2; B_isolate MPXV/USA/OH-UW-072752/2022	197176	OP169342	MPXV_OP169342	Virus_dsDNA_env; Poxviridae; Chordopoxvirinae; Orthopoxvirus; MPXV; 2; B	Monkeypox virus	Linear	OP169342 USA 2022	West Af	3	2	N America	USA	USA: OH	B	Human	MPXV/USA/OH-UW-072752/2022	2022	Homo sapiens	OP169342
OP169343	Wed Jun 26 18:51:23 CDT 2024	MPXV; 2; B_isolate MPXV/USA/OH-UW-075598/2022	197175	OP169343	MPXV_OP169343	Virus_dsDNA_env; Poxviridae; Chordopoxvirinae; Orthopoxvirus; MPXV; 2; B	Monkeypox virus	Linear	OP169343 USA 2022	West Af	3	2	N America	USA	USA: OH	B	Human	MPXV/USA/OH-UW-075598/2022	2022	Homo sapiens	OP169343
OP169344	Wed Jun 26 18:51:23 CDT 2024	MPXV; 2; B_isolate MPXV/USA/WA-UW-071966/2022	197174	OP169344	MPXV_OP169344	Virus_dsDNA_env; Poxviridae; Chordopoxvirinae; Orthopoxvirus; MPXV; 2; B	Monkeypox virus	Linear	OP169344 USA 2022	West Af	3	2	N America	USA	USA: WA	B	Human	MPXV/USA/WA-UW-071966/2022	2022	Homo sapiens	OP169344
OP169345	Wed Jun 26 18:51:23 CDT 2024	MPXV; 2; B_isolate MPXV/USA/WA-UW-075687/2022	197174	OP169345	MPXV_OP169345	Virus_dsDNA_env; Poxviridae; Chordopoxvirinae; Orthopoxvirus; MPXV; 2; B	Monkeypox virus	Linear	OP169345 USA 2022	West Af	3	2	N America	USA	USA: WA	B	Human	MPXV/USA/WA-UW-075687/2022	2022	Homo sapiens	OP169345
OP169346	Wed Jun 26 18:51:23 CDT 2024	MPXV; 2; B_isolate MPXV/USA/WA-UW-072839/2022	197178	OP169346	MPXV_OP169346	Virus_dsDNA_env; Poxviridae; Chordopoxvirinae; Orthopoxvirus; MPXV; 2; B	Monkeypox virus	Linear	OP169346 USA 2022	West Af	3	2	N America	USA	USA: WA	B	Human	MPXV/USA/WA-UW-072839/2022	2022	Homo sapiens	OP169346
OP171919	Wed Jun 26 18:51:23 CDT 2024	MPXV; 2; B_isolate MPXV22/USA-NE-25	197182	OP171919	MPXV_OP171919	Virus_dsDNA_env; Poxviridae; Chordopoxvirinae; Orthopoxvirus; MPXV; 2; B	Monkeypox virus	Linear	OP171919 USA 2022	West Af	3	2	N America	USA	USA: NE	B	Human	MPXV22/USA-NE-25	2022	Homo sapiens	OP171919
OP171920	Wed Jun 26 18:51:23 CDT 2024	MPXV; 2; B_isolate MPXV22/USA-NE-31	197182	OP171920	MPXV_OP171920	Virus_dsDNA_env; Poxviridae; Chordopoxvirinae; Orthopoxvirus; MPXV; 2; B	Monkeypox virus	Linear	OP171920 USA 2022	West Af	3	2	N America	USA	USA: NE	B	Human	MPXV22/USA-NE-31	2022	Homo sapiens	OP171920
OP171921	Wed Jun 26 18:51:23 CDT 2024	MPXV; 2; B_isolate MPXV22/USA-NE-43	197182	OP171921	MPXV_OP171921	Virus_dsDNA_env; Poxviridae; Chordopoxvirinae; Orthopoxvirus; MPXV; 2; B	Monkeypox virus	Linear	OP171921 USA 2022	West Af	3	2	N America	USA	USA: NE	B	Human	MPXV22/USA-NE-43	2022	Homo sapiens	OP171921
OP171922	Wed Jun 26 18:51:23 CDT 2024	MPXV; 2; B_isolate MPXV22/USA-NE-44	197182	OP171922	MPXV_OP171922	Virus_dsDNA_env; Poxviridae; Chordopoxvirinae; Orthopoxvirus; MPXV; 2; B	Monkeypox virus	Linear	OP171922 USA 2022	West Af	3	2	N America	USA	USA: NE	B	Human	MPXV22/USA-NE-44	2022	Homo sapiens	OP171922
OP171923	Wed Jun 26 18:51:23 CDT 2024	MPXV; 2; B_isolate MPXV22/USA-NE-48	197182	OP171923	MPXV_OP171923	Virus_dsDNA_env; Poxviridae; Chordopoxvirinae; Orthopoxvirus; MPXV; 2; B	Monkeypox virus	Linear	OP171923 USA 2022	West Af	3	2	N America	USA	USA: NE	B	Human	MPXV22/USA-NE-48	2022	Homo sapiens	OP171923
OP171924	Wed Jun 26 18:51:23 CDT 2024	MPXV; 2; B_isolate MPXV22/USA-NE-63	197199	OP171924	MPXV_OP171924	Virus_dsDNA_env; Poxviridae; Chordopoxvirinae; Orthopoxvirus; MPXV; 2; B	Monkeypox virus	Linear	OP171924 USA 2022	West Af	3	2	N America	USA	USA: NE	B	Human	MPXV22/USA-NE-63	2022	Homo sapiens	OP171924
OP171925	Wed Jun 26 18:51:23 CDT 2024	MPXV; 2; B_isolate MPXV22/USA-NE-75	197182	OP171925	MPXV_OP171925	Virus_dsDNA_env; Poxviridae; Chordopoxvirinae; Orthopoxvirus; MPXV; 2; B	Monkeypox virus	Linear	OP171925 USA 2022	West Af	3	2	N America	USA	USA: NE	B	Human	MPXV22/USA-NE-75	2022	Homo sapiens	OP171925
OP184760	Wed Jun 26 18:51:23 CDT 2024	MPXV; 2; B_isolate MPXV/USA/WA-UW-079401/2022	197176	OP184760	MPXV_OP184760	Virus_dsDNA_env; Poxviridae; Chordopoxvirinae; Orthopoxvirus; MPXV; 2; B	Monkeypox virus	Linear	OP184760 USA 2022	West Af	3	2	N America	USA	USA: WA	B	Human	MPXV/USA/WA-UW-079401/2022	2022	Homo sapiens	OP184760
OP184761	Wed Jun 26 18:51:23 CDT 2024	MPXV; 2; B_isolate MPXV/USA/WA-UW-078603/2022	197176	OP184761	MPXV_OP184761	Virus_dsDNA_env; Poxviridae; Chordopoxvirinae; Orthopoxvirus; MPXV; 2; B	Monkeypox virus	Linear	OP184761 USA 2022	West Af	3	2	N America	USA	USA: WA	B	Human	MPXV/USA/WA-UW-078603/2022	2022	Homo sapiens	OP184761
OP184762	Wed Jun 26 18:51:23 CDT 2024	MPXV; 2; B_isolate MPXV/USA/WA-UW-074949/2022	197176	OP184762	MPXV_OP184762	Virus_dsDNA_env; Poxviridae; Chordopoxvirinae; Orthopoxvirus; MPXV; 2; B	Monkeypox virus	Linear	OP184762 USA 2022	West Af	3	2	N America	USA	USA: WA	B	Human	MPXV/USA/WA-UW-074949/2022	2022	Homo sapiens	OP184762
OP184763	Wed Jun 26 18:51:23 CDT 2024	MPXV; 2; B_isolate MPXV/USA/WA-UW-076773/2022	197191	OP184763	MPXV_OP184763	Virus_dsDNA_env; Poxviridae; Chordopoxvirinae; Orthopoxvirus; MPXV; 2; B	Monkeypox virus	Linear	OP184763 USA 2022	West Af	3	2	N America	USA	USA: WA	B	Human	MPXV/USA/WA-UW-076773/2022	2022	Homo sapiens	OP184763
OP184764	Wed Jun 26 18:51:23 CDT 2024	MPXV; 2; B_isolate MPXV/USA/WA-UW-074932/2022	197174	OP184764	MPXV_OP184764	Virus_dsDNA_env; Poxviridae; Chordopoxvirinae; Orthopoxvirus; MPXV; 2; B	Monkeypox virus	Linear	OP184764 USA 2022	West Af	3	2	N America	USA	USA: WA	B	Human	MPXV/USA/WA-UW-074932/2022	2022	Homo sapiens	OP184764
OP184765	Wed Jun 26 18:51:23 CDT 2024	MPXV; 2; B_isolate MPXV/USA/WA-UW-074988/2022	197176	OP184765	MPXV_OP184765	Virus_dsDNA_env; Poxviridae; Chordopoxvirinae; Orthopoxvirus; MPXV; 2; B	Monkeypox virus	Linear	OP184765 USA 2022	West Af	3	2	N America	USA	USA: WA	B	Human	MPXV/USA/WA-UW-074988/2022	2022	Homo sapiens	OP184765
OP185709	Wed Jun 26 18:51:23 CDT 2024	MPXV; 2; B_isolate MPXV_USA_2022_TX0001	197236	OP185709	MPXV_OP185709	Virus_dsDNA_env; Poxviridae; Chordopoxvirinae; Orthopoxvirus; MPXV; 2; B	Monkeypox virus	Linear	OP185709 USA 2022	West Af	3	2	N America	USA	USA: TX	B	Human	MPXV_USA_2022_TX0001	2022	Homo sapiens	OP185709
OP185710	Wed Jun 26 18:51:23 CDT 2024	MPXV; 2; B_isolate MPXV_USA_2022_NY0007	197163	OP185710	MPXV_OP185710	Virus_dsDNA_env; Poxviridae; Chordopoxvirinae; Orthopoxvirus; MPXV; 2; B	Monkeypox virus	Linear	OP185710 USA 2022	West Af	3	2	N America	USA	USA: NY	B	Human	MPXV_USA_2022_NY0007	2022	Homo sapiens	OP185710
OP185711	Wed Jun 26 18:51:23 CDT 2024	MPXV; 2; B_isolate MPXV_USA_2022_NY0006	197189	OP185711	MPXV_OP185711	Virus_dsDNA_env; Poxviridae; Chordopoxvirinae; Orthopoxvirus; MPXV; 2; B	Monkeypox virus	Linear	OP185711 USA 2022	West Af	3	2	N America	USA	USA: NY	B	Human	MPXV_USA_2022_NY0006	2022	Homo sapiens	OP185711
OP185712	Wed Jun 26 18:51:23 CDT 2024	MPXV; 2; B_isolate MPXV_USA_2022_IL0005	197135	OP185712	MPXV_OP185712	Virus_dsDNA_env; Poxviridae; Chordopoxvirinae; Orthopoxvirus; MPXV; 2; B	Monkeypox virus	Linear	OP185712 USA 2022	West Af	3	2	N America	USA	USA: IL	B	Human	MPXV_USA_2022_IL0005	2022	Homo sapiens	OP185712
OP185713	Wed Jun 26 18:51:23 CDT 2024	MPXV; 2; B_isolate MPXV_USA_2022_FL0004	197315	OP185713	MPXV_OP185713	Virus_dsDNA_env; Poxviridae; Chordopoxvirinae; Orthopoxvirus; MPXV; 2; B	Monkeypox virus	Linear	OP185713 USA 2022	West Af	2	2	N America	USA	USA: FL	B	Human	MPXV_USA_2022_FL0004	2022	Homo sapiens	OP185713
OP185714	Wed Jun 26 18:51:23 CDT 2024	MPXV; 2; B_isolate MPXV_USA_2022_CO0003	197235	OP185714	MPXV_OP185714	Virus_dsDNA_env; Poxviridae; Chordopoxvirinae; Orthopoxvirus; MPXV; 2; B	Monkeypox virus	Linear	OP185714 USA 2022	West Af	3	2	N America	USA	USA: CO	B	Human	MPXV_USA_2022_CO0003	2022	Homo sapiens	OP185714
OP185715	Wed Jun 26 18:51:23 CDT 2024	MPXV; 2; B_isolate MPXV_USA_2022_CO0002	197216	OP185715	MPXV_OP185715	Virus_dsDNA_env; Poxviridae; Chordopoxvirinae; Orthopoxvirus; MPXV; 2; B	Monkeypox virus	Linear	OP185715 USA 2022	West Af	3	2	N America	USA	USA: CO	B	Human	MPXV_USA_2022_CO0002	2022	Homo sapiens	OP185715
OP185716	Wed Jun 26 18:51:23 CDT 2024	MPXV; 2; B_isolate MPXV_USA_2022_CA0005	197015	OP185716	MPXV_OP185716	Virus_dsDNA_env; Poxviridae; Chordopoxvirinae; Orthopoxvirus; MPXV; 2; B	Monkeypox virus	Linear	OP185716 USA 2022	West Af	3	2	N America	USA	USA: CA	B	Human	MPXV_USA_2022_CA0005	2022	Homo sapiens	OP185716
OP185717	Wed Jun 26 18:51:23 CDT 2024	MPXV; 2; B_isolate MPXV_USA_2022_AZ0001	197302	OP185717	MPXV_OP185717	Virus_dsDNA_env; Poxviridae; Chordopoxvirinae; Orthopoxvirus; MPXV; 2; B	Monkeypox virus	Linear	OP185717 USA 2022	West Af	3	2	N America	USA	USA: AZ	B	Human	MPXV_USA_2022_AZ0001	2022	Homo sapiens	OP185717
OP204840	Wed Jun 26 18:51:23 CDT 2024	MPXV; 2; B_isolate PatientMPXV	197601	OP204840	MPXV_OP204840	Virus_dsDNA_env; Poxviridae; Chordopoxvirinae; Orthopoxvirus; MPXV; 2; B	Monkeypox virus	Linear	OP204840 FRA 2022	West Af	3	2	Europe	FRA	France	B	Human	PatientMPXV	2022	Homo sapiens	OP204840
OP204857	Wed Jun 26 18:51:23 CDT 2024	MPXV; 2; B_isolate MPXV-ROK-P1-2022	197200	OP204857	MPXV_OP204857	Virus_dsDNA_env; Poxviridae; Chordopoxvirinae; Orthopoxvirus; MPXV; 2; B	Monkeypox virus	Linear	OP204857 KOR 2022	West Af	3	2	Asia	KOR	South Korea	B	Human	MPXV-ROK-P1-2022	2022	Homo sapiens	OP204857
OP205067	Wed Jun 26 18:51:23 CDT 2024	MPXV; 2; B_isolate MPXV_UK_2022_9000061	197207	OP205067	MPXV_OP205067	Virus_dsDNA_env; Poxviridae; Chordopoxvirinae; Orthopoxvirus; MPXV; 2; B	Monkeypox virus	Linear	OP205067 GBR 2022	West Af	3	2	Europe	GBR	United Kingdom	B	Human	MPXV_UK_2022_9000061	2022	Homo sapiens	OP205067
OP205068	Wed Jun 26 18:51:23 CDT 2024	MPXV; 2; B_isolate MPXV_UK_2022_9000062	197207	OP205068	MPXV_OP205068	Virus_dsDNA_env; Poxviridae; Chordopoxvirinae; Orthopoxvirus; MPXV; 2; B	Monkeypox virus	Linear	OP205068 GBR 2022	West Af	3	2	Europe	GBR	United Kingdom	B	Human	MPXV_UK_2022_9000062	2022	Homo sapiens	OP205068
OP205069	Wed Jun 26 18:51:23 CDT 2024	MPXV; 2; B_isolate MPXV_UK_2022_9000063	197207	OP205069	MPXV_OP205069	Virus_dsDNA_env; Poxviridae; Chordopoxvirinae; Orthopoxvirus; MPXV; 2; B	Monkeypox virus	Linear	OP205069 GBR 2022	West Af	3	2	Europe	GBR	United Kingdom	B	Human	MPXV_UK_2022_9000063	2022	Homo sapiens	OP205069
OP205070	Wed Jun 26 18:51:23 CDT 2024	MPXV; 2; B_isolate MPXV_UK_2022_9000064	197205	OP205070	MPXV_OP205070	Virus_dsDNA_env; Poxviridae; Chordopoxvirinae; Orthopoxvirus; MPXV; 2; B	Monkeypox virus	Linear	OP205070 GBR 2022	West Af	3	2	Europe	GBR	United Kingdom	B	Human	MPXV_UK_2022_9000064	2022	Homo sapiens	OP205070
OP205071	Wed Jun 26 18:51:23 CDT 2024	MPXV; 2; B_isolate MPXV_UK_2022_9000065	197202	OP205071	MPXV_OP205071	Virus_dsDNA_env; Poxviridae; Chordopoxvirinae; Orthopoxvirus; MPXV; 2; B	Monkeypox virus	Linear	OP205071 GBR 2022	West Af	3	2	Europe	GBR	United Kingdom	B	Human	MPXV_UK_2022_9000065	2022	Homo sapiens	OP205071
OP205072	Wed Jun 26 18:51:23 CDT 2024	MPXV; 2; B_isolate MPXV_UK_2022_9000066	197179	OP205072	MPXV_OP205072	Virus_dsDNA_env; Poxviridae; Chordopoxvirinae; Orthopoxvirus; MPXV; 2; B	Monkeypox virus	Linear	OP205072 GBR 2022	West Af	3	2	Europe	GBR	United Kingdom	B	Human	MPXV_UK_2022_9000066	2022	Homo sapiens	OP205072
OP205073	Wed Jun 26 18:51:23 CDT 2024	MPXV; 2; B_isolate MPXV_UK_2022_9000067	197209	OP205073	MPXV_OP205073	Virus_dsDNA_env; Poxviridae; Chordopoxvirinae; Orthopoxvirus; MPXV; 2; B	Monkeypox virus	Linear	OP205073 GBR 2022	West Af	3	2	Europe	GBR	United Kingdom	B	Human	MPXV_UK_2022_9000067	2022	Homo sapiens	OP205073
OP205074	Wed Jun 26 18:51:23 CDT 2024	MPXV; 2; B_isolate MPXV_UK_2022_9000068	197205	OP205074	MPXV_OP205074	Virus_dsDNA_env; Poxviridae; Chordopoxvirinae; Orthopoxvirus; MPXV; 2; B	Monkeypox virus	Linear	OP205074 GBR 2022	West Af	3	2	Europe	GBR	United Kingdom	B	Human	MPXV_UK_2022_9000068	2022	Homo sapiens	OP205074
OP205075	Wed Jun 26 18:51:23 CDT 2024	MPXV; 2; B_isolate MPXV_UK_2022_9000069	197205	OP205075	MPXV_OP205075	Virus_dsDNA_env; Poxviridae; Chordopoxvirinae; Orthopoxvirus; MPXV; 2; B	Monkeypox virus	Linear	OP205075 GBR 2022	West Af	3	2	Europe	GBR	United Kingdom	B	Human	MPXV_UK_2022_9000069	2022	Homo sapiens	OP205075
OP205076	Wed Jun 26 18:51:23 CDT 2024	MPXV; 2; B_isolate MPXV_UK_2022_9000070	197205	OP205076	MPXV_OP205076	Virus_dsDNA_env; Poxviridae; Chordopoxvirinae; Orthopoxvirus; MPXV; 2; B	Monkeypox virus	Linear	OP205076 GBR 2022	West Af	3	2	Europe	GBR	United Kingdom	B	Human	MPXV_UK_2022_9000070	2022	Homo sapiens	OP205076
OP205077	Wed Jun 26 18:51:23 CDT 2024	MPXV; 2; B_isolate MPXV_UK_2022_9000071	197205	OP205077	MPXV_OP205077	Virus_dsDNA_env; Poxviridae; Chordopoxvirinae; Orthopoxvirus; MPXV; 2; B	Monkeypox virus	Linear	OP205077 GBR 2022	West Af	3	2	Europe	GBR	United Kingdom	B	Human	MPXV_UK_2022_9000071	2022	Homo sapiens	OP205077
OP205078	Wed Jun 26 18:51:23 CDT 2024	MPXV; 2; B_isolate MPXV_UK_2022_9000072	197205	OP205078	MPXV_OP205078	Virus_dsDNA_env; Poxviridae; Chordopoxvirinae; Orthopoxvirus; MPXV; 2; B	Monkeypox virus	Linear	OP205078 GBR 2022	West Af	3	2	Europe	GBR	United Kingdom	B	Human	MPXV_UK_2022_9000072	2022	Homo sapiens	OP205078
OP205079	Wed Jun 26 18:51:23 CDT 2024	MPXV; 2; B_isolate MPXV_UK_2022_9000074	197205	OP205079	MPXV_OP205079	Virus_dsDNA_env; Poxviridae; Chordopoxvirinae; Orthopoxvirus; MPXV; 2; B	Monkeypox virus	Linear	OP205079 GBR 2022	West Af	3	2	Europe	GBR	United Kingdom	B	Human	MPXV_UK_2022_9000074	2022	Homo sapiens	OP205079
OP205080	Wed Jun 26 18:51:23 CDT 2024	MPXV; 2; B_isolate MPXV_UK_2022_9000076	197175	OP205080	MPXV_OP205080	Virus_dsDNA_env; Poxviridae; Chordopoxvirinae; Orthopoxvirus; MPXV; 2; B	Monkeypox virus	Linear	OP205080 GBR 2022	West Af	3	2	Europe	GBR	United Kingdom	B	Human	MPXV_UK_2022_9000076	2022	Homo sapiens	OP205080
OP205081	Wed Jun 26 18:51:23 CDT 2024	MPXV; 2; B_isolate MPXV_UK_2022_9000078	197205	OP205081	MPXV_OP205081	Virus_dsDNA_env; Poxviridae; Chordopoxvirinae; Orthopoxvirus; MPXV; 2; B	Monkeypox virus	Linear	OP205081 GBR 2022	West Af	3	2	Europe	GBR	United Kingdom	B	Human	MPXV_UK_2022_9000078	2022	Homo sapiens	OP205081
OP205083	Wed Jun 26 18:51:23 CDT 2024	MPXV; 2; B_isolate MPXV_UK_2022_9000092	197165	OP205083	MPXV_OP205083	Virus_dsDNA_env; Poxviridae; Chordopoxvirinae; Orthopoxvirus; MPXV; 2; B	Monkeypox virus	Linear	OP205083 GBR 2022	West Af	3	2	Europe	GBR	United Kingdom	B	Human	MPXV_UK_2022_9000092	2022	Homo sapiens	OP205083
OP205084	Wed Jun 26 18:51:23 CDT 2024	MPXV; 2; B_isolate MPXV_UK_2022_9000093	197179	OP205084	MPXV_OP205084	Virus_dsDNA_env; Poxviridae; Chordopoxvirinae; Orthopoxvirus; MPXV; 2; B	Monkeypox virus	Linear	OP205084 GBR 2022	West Af	3	2	Europe	GBR	United Kingdom	B	Human	MPXV_UK_2022_9000093	2022	Homo sapiens	OP205084
OP205085	Wed Jun 26 18:51:23 CDT 2024	MPXV; 2; B_isolate MPXV_UK_2022_9000096	197205	OP205085	MPXV_OP205085	Virus_dsDNA_env; Poxviridae; Chordopoxvirinae; Orthopoxvirus; MPXV; 2; B	Monkeypox virus	Linear	OP205085 GBR 2022	West Af	3	2	Europe	GBR	United Kingdom	B	Human	MPXV_UK_2022_9000096	2022	Homo sapiens	OP205085
OP205086	Wed Jun 26 18:51:23 CDT 2024	MPXV; 2; B_isolate MPXV_UK_2022_9000097	197203	OP205086	MPXV_OP205086	Virus_dsDNA_env; Poxviridae; Chordopoxvirinae; Orthopoxvirus; MPXV; 2; B	Monkeypox virus	Linear	OP205086 GBR 2022	West Af	3	2	Europe	GBR	United Kingdom	B	Human	MPXV_UK_2022_9000097	2022	Homo sapiens	OP205086
OP205087	Wed Jun 26 18:51:23 CDT 2024	MPXV; 2; B_isolate MPXV_UK_2022_9000099	197165	OP205087	MPXV_OP205087	Virus_dsDNA_env; Poxviridae; Chordopoxvirinae; Orthopoxvirus; MPXV; 2; B	Monkeypox virus	Linear	OP205087 GBR 2022	West Af	3	2	Europe	GBR	United Kingdom	B	Human	MPXV_UK_2022_9000099	2022	Homo sapiens	OP205087
OP205088	Wed Jun 26 18:51:23 CDT 2024	MPXV; 2; B_isolate MPXV_UK_2022_9000100	197165	OP205088	MPXV_OP205088	Virus_dsDNA_env; Poxviridae; Chordopoxvirinae; Orthopoxvirus; MPXV; 2; B	Monkeypox virus	Linear	OP205088 GBR 2022	West Af	3	2	Europe	GBR	United Kingdom	B	Human	MPXV_UK_2022_9000100	2022	Homo sapiens	OP205088
OP205089	Wed Jun 26 18:51:23 CDT 2024	MPXV; 2; B_isolate MPXV_UK_2022_9000101	197205	OP205089	MPXV_OP205089	Virus_dsDNA_env; Poxviridae; Chordopoxvirinae; Orthopoxvirus; MPXV; 2; B	Monkeypox virus	Linear	OP205089 GBR 2022	West Af	3	2	Europe	GBR	United Kingdom	B	Human	MPXV_UK_2022_9000101	2022	Homo sapiens	OP205089
OP205090	Wed Jun 26 18:51:23 CDT 2024	MPXV; 2; B_isolate MPXV_UK_2022_9000102	197205	OP205090	MPXV_OP205090	Virus_dsDNA_env; Poxviridae; Chordopoxvirinae; Orthopoxvirus; MPXV; 2; B	Monkeypox virus	Linear	OP205090 GBR 2022	West Af	3	2	Europe	GBR	United Kingdom	B	Human	MPXV_UK_2022_9000102	2022	Homo sapiens	OP205090
OP205091	Wed Jun 26 18:51:23 CDT 2024	MPXV; 2; B_isolate MPXV_UK_2022_9000103	197205	OP205091	MPXV_OP205091	Virus_dsDNA_env; Poxviridae; Chordopoxvirinae; Orthopoxvirus; MPXV; 2; B	Monkeypox virus	Linear	OP205091 GBR 2022	West Af	3	2	Europe	GBR	United Kingdom	B	Human	MPXV_UK_2022_9000103	2022	Homo sapiens	OP205091
OP205092	Wed Jun 26 18:51:23 CDT 2024	MPXV; 2; B_isolate MPXV_UK_2022_9000104	197207	OP205092	MPXV_OP205092	Virus_dsDNA_env; Poxviridae; Chordopoxvirinae; Orthopoxvirus; MPXV; 2; B	Monkeypox virus	Linear	OP205092 GBR 2022	West Af	3	2	Europe	GBR	United Kingdom	B	Human	MPXV_UK_2022_9000104	2022	Homo sapiens	OP205092
OP205093	Wed Jun 26 18:51:23 CDT 2024	MPXV; 2; B_isolate MPXV_UK_2022_9000105	197205	OP205093	MPXV_OP205093	Virus_dsDNA_env; Poxviridae; Chordopoxvirinae; Orthopoxvirus; MPXV; 2; B	Monkeypox virus	Linear	OP205093 GBR 2022	West Af	3	2	Europe	GBR	United Kingdom	B	Human	MPXV_UK_2022_9000105	2022	Homo sapiens	OP205093
OP205094	Wed Jun 26 18:51:23 CDT 2024	MPXV; 2; B_isolate MPXV_UK_2022_9000106	197209	OP205094	MPXV_OP205094	Virus_dsDNA_env; Poxviridae; Chordopoxvirinae; Orthopoxvirus; MPXV; 2; B	Monkeypox virus	Linear	OP205094 GBR 2022	West Af	3	2	Europe	GBR	United Kingdom	B	Human	MPXV_UK_2022_9000106	2022	Homo sapiens	OP205094
OP205096	Wed Jun 26 18:51:23 CDT 2024	MPXV; 2; B_isolate MPXV_UK_2022_9000108	197207	OP205096	MPXV_OP205096	Virus_dsDNA_env; Poxviridae; Chordopoxvirinae; Orthopoxvirus; MPXV; 2; B	Monkeypox virus	Linear	OP205096 GBR 2022	West Af	3	2	Europe	GBR	United Kingdom	B	Human	MPXV_UK_2022_9000108	2022	Homo sapiens	OP205096
OP205097	Wed Jun 26 18:51:23 CDT 2024	MPXV; 2; B_isolate MPXV_UK_2022_9000130	197205	OP205097	MPXV_OP205097	Virus_dsDNA_env; Poxviridae; Chordopoxvirinae; Orthopoxvirus; MPXV; 2; B	Monkeypox virus	Linear	OP205097 GBR 2022	West Af	3	2	Europe	GBR	United Kingdom	B	Human	MPXV_UK_2022_9000130	2022	Homo sapiens	OP205097
OP205098	Wed Jun 26 18:51:23 CDT 2024	MPXV; 2; B_isolate MPXV_UK_2022_9000131	197205	OP205098	MPXV_OP205098	Virus_dsDNA_env; Poxviridae; Chordopoxvirinae; Orthopoxvirus; MPXV; 2; B	Monkeypox virus	Linear	OP205098 GBR 2022	West Af	3	2	Europe	GBR	United Kingdom	B	Human	MPXV_UK_2022_9000131	2022	Homo sapiens	OP205098
OP205100	Wed Jun 26 18:51:23 CDT 2024	MPXV; 2; B_isolate MPXV_UK_2022_9000134	197205	OP205100	MPXV_OP205100	Virus_dsDNA_env; Poxviridae; Chordopoxvirinae; Orthopoxvirus; MPXV; 2; B	Monkeypox virus	Linear	OP205100 GBR 2022	West Af	3	2	Europe	GBR	United Kingdom	B	Human	MPXV_UK_2022_9000134	2022	Homo sapiens	OP205100
OP205101	Wed Jun 26 18:51:23 CDT 2024	MPXV; 2; B_isolate MPXV_UK_2022_9000136	197205	OP205101	MPXV_OP205101	Virus_dsDNA_env; Poxviridae; Chordopoxvirinae; Orthopoxvirus; MPXV; 2; B	Monkeypox virus	Linear	OP205101 GBR 2022	West Af	3	2	Europe	GBR	United Kingdom	B	Human	MPXV_UK_2022_9000136	2022	Homo sapiens	OP205101
OP205102	Wed Jun 26 18:51:23 CDT 2024	MPXV; 2; B_isolate MPXV_UK_2022_9000137	197205	OP205102	MPXV_OP205102	Virus_dsDNA_env; Poxviridae; Chordopoxvirinae; Orthopoxvirus; MPXV; 2; B	Monkeypox virus	Linear	OP205102 GBR 2022	West Af	3	2	Europe	GBR	United Kingdom	B	Human	MPXV_UK_2022_9000137	2022	Homo sapiens	OP205102
OP205103	Wed Jun 26 18:51:23 CDT 2024	MPXV; 2; B_isolate MPXV_UK_2022_9000138	197189	OP205103	MPXV_OP205103	Virus_dsDNA_env; Poxviridae; Chordopoxvirinae; Orthopoxvirus; MPXV; 2; B	Monkeypox virus	Linear	OP205103 GBR 2022	West Af	3	2	Europe	GBR	United Kingdom	B	Human	MPXV_UK_2022_9000138	2022	Homo sapiens	OP205103
OP205104	Wed Jun 26 18:51:23 CDT 2024	MPXV; 2; B_isolate MPXV_UK_2022_9000140	197205	OP205104	MPXV_OP205104	Virus_dsDNA_env; Poxviridae; Chordopoxvirinae; Orthopoxvirus; MPXV; 2; B	Monkeypox virus	Linear	OP205104 GBR 2022	West Af	3	2	Europe	GBR	United Kingdom	B	Human	MPXV_UK_2022_9000140	2022	Homo sapiens	OP205104
OP205105	Wed Jun 26 18:51:23 CDT 2024	MPXV; 2; B_isolate MPXV_UK_2022_9000142	197199	OP205105	MPXV_OP205105	Virus_dsDNA_env; Poxviridae; Chordopoxvirinae; Orthopoxvirus; MPXV; 2; B	Monkeypox virus	Linear	OP205105 GBR 2022	West Af	3	2	Europe	GBR	United Kingdom	B	Human	MPXV_UK_2022_9000142	2022	Homo sapiens	OP205105
OP205106	Wed Jun 26 18:51:23 CDT 2024	MPXV; 2; B_isolate MPXV_UK_2022_9000143	197169	OP205106	MPXV_OP205106	Virus_dsDNA_env; Poxviridae; Chordopoxvirinae; Orthopoxvirus; MPXV; 2; B	Monkeypox virus	Linear	OP205106 GBR 2022	West Af	3	2	Europe	GBR	United Kingdom	B	Human	MPXV_UK_2022_9000143	2022	Homo sapiens	OP205106
OP205107	Wed Jun 26 18:51:23 CDT 2024	MPXV; 2; B_isolate MPXV_UK_2022_9000144	197205	OP205107	MPXV_OP205107	Virus_dsDNA_env; Poxviridae; Chordopoxvirinae; Orthopoxvirus; MPXV; 2; B	Monkeypox virus	Linear	OP205107 GBR 2022	West Af	3	2	Europe	GBR	United Kingdom	B	Human	MPXV_UK_2022_9000144	2022	Homo sapiens	OP205107
OP205108	Wed Jun 26 18:51:23 CDT 2024	MPXV; 2; B_isolate MPXV_UK_2022_9000145	197205	OP205108	MPXV_OP205108	Virus_dsDNA_env; Poxviridae; Chordopoxvirinae; Orthopoxvirus; MPXV; 2; B	Monkeypox virus	Linear	OP205108 GBR 2022	West Af	3	2	Europe	GBR	United Kingdom	B	Human	MPXV_UK_2022_9000145	2022	Homo sapiens	OP205108
OP205109	Wed Jun 26 18:51:23 CDT 2024	MPXV; 2; B_isolate MPXV_UK_2022_9000146	197205	OP205109	MPXV_OP205109	Virus_dsDNA_env; Poxviridae; Chordopoxvirinae; Orthopoxvirus; MPXV; 2; B	Monkeypox virus	Linear	OP205109 GBR 2022	West Af	3	2	Europe	GBR	United Kingdom	B	Human	MPXV_UK_2022_9000146	2022	Homo sapiens	OP205109
OP205110	Wed Jun 26 18:51:23 CDT 2024	MPXV; 2; B_isolate MPXV_UK_2022_9000147	197165	OP205110	MPXV_OP205110	Virus_dsDNA_env; Poxviridae; Chordopoxvirinae; Orthopoxvirus; MPXV; 2; B	Monkeypox virus	Linear	OP205110 GBR 2022	West Af	3	2	Europe	GBR	United Kingdom	B	Human	MPXV_UK_2022_9000147	2022	Homo sapiens	OP205110
OP205111	Wed Jun 26 18:51:23 CDT 2024	MPXV; 2; B_isolate MPXV_UK_2022_9000148	197205	OP205111	MPXV_OP205111	Virus_dsDNA_env; Poxviridae; Chordopoxvirinae; Orthopoxvirus; MPXV; 2; B	Monkeypox virus	Linear	OP205111 GBR 2022	West Af	3	2	Europe	GBR	United Kingdom	B	Human	MPXV_UK_2022_9000148	2022	Homo sapiens	OP205111
OP205112	Wed Jun 26 18:51:23 CDT 2024	MPXV; 2; B_isolate MPXV_UK_2022_9000149	197167	OP205112	MPXV_OP205112	Virus_dsDNA_env; Poxviridae; Chordopoxvirinae; Orthopoxvirus; MPXV; 2; B	Monkeypox virus	Linear	OP205112 GBR 2022	West Af	3	2	Europe	GBR	United Kingdom	B	Human	MPXV_UK_2022_9000149	2022	Homo sapiens	OP205112
OP205113	Wed Jun 26 18:51:23 CDT 2024	MPXV; 2; B_isolate MPXV_UK_2022_9000150	197205	OP205113	MPXV_OP205113	Virus_dsDNA_env; Poxviridae; Chordopoxvirinae; Orthopoxvirus; MPXV; 2; B	Monkeypox virus	Linear	OP205113 GBR 2022	West Af	3	2	Europe	GBR	United Kingdom	B	Human	MPXV_UK_2022_9000150	2022	Homo sapiens	OP205113
OP205114	Wed Jun 26 18:51:23 CDT 2024	MPXV; 2; B_isolate MPXV_UK_2022_9000152	197205	OP205114	MPXV_OP205114	Virus_dsDNA_env; Poxviridae; Chordopoxvirinae; Orthopoxvirus; MPXV; 2; B	Monkeypox virus	Linear	OP205114 GBR 2022	West Af	3	2	Europe	GBR	United Kingdom	B	Human	MPXV_UK_2022_9000152	2022	Homo sapiens	OP205114
OP205115	Wed Jun 26 18:51:23 CDT 2024	MPXV; 2; B_isolate MPXV_UK_2022_9000157	197205	OP205115	MPXV_OP205115	Virus_dsDNA_env; Poxviridae; Chordopoxvirinae; Orthopoxvirus; MPXV; 2; B	Monkeypox virus	Linear	OP205115 GBR 2022	West Af	3	2	Europe	GBR	United Kingdom	B	Human	MPXV_UK_2022_9000157	2022	Homo sapiens	OP205115
OP205116	Wed Jun 26 18:51:23 CDT 2024	MPXV; 2; B_isolate MPXV_UK_2022_9000158	197205	OP205116	MPXV_OP205116	Virus_dsDNA_env; Poxviridae; Chordopoxvirinae; Orthopoxvirus; MPXV; 2; B	Monkeypox virus	Linear	OP205116 GBR 2022	West Af	3	2	Europe	GBR	United Kingdom	B	Human	MPXV_UK_2022_9000158	2022	Homo sapiens	OP205116
OP205117	Wed Jun 26 18:51:23 CDT 2024	MPXV; 2; B_isolate MPXV_UK_2022_9000159	197205	OP205117	MPXV_OP205117	Virus_dsDNA_env; Poxviridae; Chordopoxvirinae; Orthopoxvirus; MPXV; 2; B	Monkeypox virus	Linear	OP205117 GBR 2022	West Af	3	2	Europe	GBR	United Kingdom	B	Human	MPXV_UK_2022_9000159	2022	Homo sapiens	OP205117
OP205118	Wed Jun 26 18:51:23 CDT 2024	MPXV; 2; B_isolate MPXV_UK_2022_9000160	197205	OP205118	MPXV_OP205118	Virus_dsDNA_env; Poxviridae; Chordopoxvirinae; Orthopoxvirus; MPXV; 2; B	Monkeypox virus	Linear	OP205118 GBR 2022	West Af	3	2	Europe	GBR	United Kingdom	B	Human	MPXV_UK_2022_9000160	2022	Homo sapiens	OP205118
OP205119	Wed Jun 26 18:51:23 CDT 2024	MPXV; 2; B_isolate MPXV_UK_2022_9000161	197205	OP205119	MPXV_OP205119	Virus_dsDNA_env; Poxviridae; Chordopoxvirinae; Orthopoxvirus; MPXV; 2; B	Monkeypox virus	Linear	OP205119 GBR 2022	West Af	3	2	Europe	GBR	United Kingdom	B	Human	MPXV_UK_2022_9000161	2022	Homo sapiens	OP205119
OP205120	Wed Jun 26 18:51:23 CDT 2024	MPXV; 2; B_isolate MPXV_UK_2022_9000162	197181	OP205120	MPXV_OP205120	Virus_dsDNA_env; Poxviridae; Chordopoxvirinae; Orthopoxvirus; MPXV; 2; B	Monkeypox virus	Linear	OP205120 GBR 2022	West Af	3	2	Europe	GBR	United Kingdom	B	Human	MPXV_UK_2022_9000162	2022	Homo sapiens	OP205120
OP205121	Wed Jun 26 18:51:23 CDT 2024	MPXV; 2; B_isolate MPXV_UK_2022_9000164	197205	OP205121	MPXV_OP205121	Virus_dsDNA_env; Poxviridae; Chordopoxvirinae; Orthopoxvirus; MPXV; 2; B	Monkeypox virus	Linear	OP205121 GBR 2022	West Af	3	2	Europe	GBR	United Kingdom	B	Human	MPXV_UK_2022_9000164	2022	Homo sapiens	OP205121
OP205122	Wed Jun 26 18:51:23 CDT 2024	MPXV; 2; B_isolate MPXV_UK_2022_9000165	197205	OP205122	MPXV_OP205122	Virus_dsDNA_env; Poxviridae; Chordopoxvirinae; Orthopoxvirus; MPXV; 2; B	Monkeypox virus	Linear	OP205122 GBR 2022	West Af	3	2	Europe	GBR	United Kingdom	B	Human	MPXV_UK_2022_9000165	2022	Homo sapiens	OP205122
OP205123	Wed Jun 26 18:51:23 CDT 2024	MPXV; 2; B_isolate MPXV_UK_2022_9000167	197205	OP205123	MPXV_OP205123	Virus_dsDNA_env; Poxviridae; Chordopoxvirinae; Orthopoxvirus; MPXV; 2; B	Monkeypox virus	Linear	OP205123 GBR 2022	West Af	3	2	Europe	GBR	United Kingdom	B	Human	MPXV_UK_2022_9000167	2022	Homo sapiens	OP205123
OP205124	Wed Jun 26 18:51:23 CDT 2024	MPXV; 2; B_isolate MPXV_UK_2022_9000173	197205	OP205124	MPXV_OP205124	Virus_dsDNA_env; Poxviridae; Chordopoxvirinae; Orthopoxvirus; MPXV; 2; B	Monkeypox virus	Linear	OP205124 GBR 2022	West Af	3	2	Europe	GBR	United Kingdom	B	Human	MPXV_UK_2022_9000173	2022	Homo sapiens	OP205124
OP205125	Wed Jun 26 18:51:23 CDT 2024	MPXV; 2; B_isolate MPXV_UK_2022_9000175	197205	OP205125	MPXV_OP205125	Virus_dsDNA_env; Poxviridae; Chordopoxvirinae; Orthopoxvirus; MPXV; 2; B	Monkeypox virus	Linear	OP205125 GBR 2022	West Af	3	2	Europe	GBR	United Kingdom	B	Human	MPXV_UK_2022_9000175	2022	Homo sapiens	OP205125
OP205126	Wed Jun 26 18:51:23 CDT 2024	MPXV; 2; B_isolate MPXV_UK_2022_9000177	197205	OP205126	MPXV_OP205126	Virus_dsDNA_env; Poxviridae; Chordopoxvirinae; Orthopoxvirus; MPXV; 2; B	Monkeypox virus	Linear	OP205126 GBR 2022	West Af	3	2	Europe	GBR	United Kingdom	B	Human	MPXV_UK_2022_9000177	2022	Homo sapiens	OP205126
OP205127	Wed Jun 26 18:51:23 CDT 2024	MPXV; 2; B_isolate MPXV_UK_2022_9000178	197205	OP205127	MPXV_OP205127	Virus_dsDNA_env; Poxviridae; Chordopoxvirinae; Orthopoxvirus; MPXV; 2; B	Monkeypox virus	Linear	OP205127 GBR 2022	West Af	3	2	Europe	GBR	United Kingdom	B	Human	MPXV_UK_2022_9000178	2022	Homo sapiens	OP205127
OP205129	Wed Jun 26 18:51:23 CDT 2024	MPXV; 2; B_isolate MPXV_UK_2022_9000184	197205	OP205129	MPXV_OP205129	Virus_dsDNA_env; Poxviridae; Chordopoxvirinae; Orthopoxvirus; MPXV; 2; B	Monkeypox virus	Linear	OP205129 GBR 2022	West Af	3	2	Europe	GBR	United Kingdom	B	Human	MPXV_UK_2022_9000184	2022	Homo sapiens	OP205129
OP205130	Wed Jun 26 18:51:23 CDT 2024	MPXV; 2; B_isolate MPXV_UK_2022_9000185	197205	OP205130	MPXV_OP205130	Virus_dsDNA_env; Poxviridae; Chordopoxvirinae; Orthopoxvirus; MPXV; 2; B	Monkeypox virus	Linear	OP205130 GBR 2022	West Af	3	2	Europe	GBR	United Kingdom	B	Human	MPXV_UK_2022_9000185	2022	Homo sapiens	OP205130
OP205131	Wed Jun 26 18:51:23 CDT 2024	MPXV; 2; B_isolate MPXV_UK_2022_9000186	197165	OP205131	MPXV_OP205131	Virus_dsDNA_env; Poxviridae; Chordopoxvirinae; Orthopoxvirus; MPXV; 2; B	Monkeypox virus	Linear	OP205131 GBR 2022	West Af	3	2	Europe	GBR	United Kingdom	B	Human	MPXV_UK_2022_9000186	2022	Homo sapiens	OP205131
OP205132	Wed Jun 26 18:51:23 CDT 2024	MPXV; 2; B_isolate MPXV_UK_2022_9000187	197205	OP205132	MPXV_OP205132	Virus_dsDNA_env; Poxviridae; Chordopoxvirinae; Orthopoxvirus; MPXV; 2; B	Monkeypox virus	Linear	OP205132 GBR 2022	West Af	3	2	Europe	GBR	United Kingdom	B	Human	MPXV_UK_2022_9000187	2022	Homo sapiens	OP205132
OP205133	Wed Jun 26 18:51:23 CDT 2024	MPXV; 2; B_isolate MPXV_UK_2022_9000188	197205	OP205133	MPXV_OP205133	Virus_dsDNA_env; Poxviridae; Chordopoxvirinae; Orthopoxvirus; MPXV; 2; B	Monkeypox virus	Linear	OP205133 GBR 2022	West Af	3	2	Europe	GBR	United Kingdom	B	Human	MPXV_UK_2022_9000188	2022	Homo sapiens	OP205133
OP205134	Wed Jun 26 18:51:23 CDT 2024	MPXV; 2; B_isolate MPXV_UK_2022_9000189	197205	OP205134	MPXV_OP205134	Virus_dsDNA_env; Poxviridae; Chordopoxvirinae; Orthopoxvirus; MPXV; 2; B	Monkeypox virus	Linear	OP205134 GBR 2022	West Af	3	2	Europe	GBR	United Kingdom	B	Human	MPXV_UK_2022_9000189	2022	Homo sapiens	OP205134
OP205135	Wed Jun 26 18:51:23 CDT 2024	MPXV; 2; B_isolate MPXV_UK_2022_9000190	197207	OP205135	MPXV_OP205135	Virus_dsDNA_env; Poxviridae; Chordopoxvirinae; Orthopoxvirus; MPXV; 2; B	Monkeypox virus	Linear	OP205135 GBR 2022	West Af	3	2	Europe	GBR	United Kingdom	B	Human	MPXV_UK_2022_9000190	2022	Homo sapiens	OP205135
OP205136	Wed Jun 26 18:51:23 CDT 2024	MPXV; 2; B_isolate MPXV_UK_2022_9000191	197207	OP205136	MPXV_OP205136	Virus_dsDNA_env; Poxviridae; Chordopoxvirinae; Orthopoxvirus; MPXV; 2; B	Monkeypox virus	Linear	OP205136 GBR 2022	West Af	3	2	Europe	GBR	United Kingdom	B	Human	MPXV_UK_2022_9000191	2022	Homo sapiens	OP205136
OP205137	Wed Jun 26 18:51:23 CDT 2024	MPXV; 2; B_isolate MPXV_UK_2022_9000192	197205	OP205137	MPXV_OP205137	Virus_dsDNA_env; Poxviridae; Chordopoxvirinae; Orthopoxvirus; MPXV; 2; B	Monkeypox virus	Linear	OP205137 GBR 2022	West Af	3	2	Europe	GBR	United Kingdom	B	Human	MPXV_UK_2022_9000192	2022	Homo sapiens	OP205137
OP205138	Wed Jun 26 18:51:23 CDT 2024	MPXV; 2; B_isolate MPXV_UK_2022_9000195	197205	OP205138	MPXV_OP205138	Virus_dsDNA_env; Poxviridae; Chordopoxvirinae; Orthopoxvirus; MPXV; 2; B	Monkeypox virus	Linear	OP205138 GBR 2022	West Af	3	2	Europe	GBR	United Kingdom	B	Human	MPXV_UK_2022_9000195	2022	Homo sapiens	OP205138
OP205139	Wed Jun 26 18:51:23 CDT 2024	MPXV; 2; B_isolate MPXV_UK_2022_9000090	197205	OP205139	MPXV_OP205139	Virus_dsDNA_env; Poxviridae; Chordopoxvirinae; Orthopoxvirus; MPXV; 2; B	Monkeypox virus	Linear	OP205139 GBR 2022	West Af	3	2	Europe	GBR	United Kingdom	B	Human	MPXV_UK_2022_9000090	2022	Homo sapiens	OP205139
OP215204	Wed Jun 26 18:51:23 CDT 2024	MPXV; 2; B_isolate MPXV/Germany/2022/RKI188	197140	OP215204	MPXV_OP215204	Virus_dsDNA_env; Poxviridae; Chordopoxvirinae; Orthopoxvirus; MPXV; 2; B	Monkeypox virus	Linear	OP215204 DEU 2022	West Af	3	2	Europe	DEU	Germany	B	Human	MPXV/Germany/2022/RKI188	2022	Homo sapiens	OP215204
OP215208	Wed Jun 26 18:51:23 CDT 2024	MPXV; 2; B_isolate MPXV/Germany/2022/RKI196	197139	OP215208	MPXV_OP215208	Virus_dsDNA_env; Poxviridae; Chordopoxvirinae; Orthopoxvirus; MPXV; 2; B	Monkeypox virus	Linear	OP215208 DEU 2022	West Af	3	2	Europe	DEU	Germany	B	Human	MPXV/Germany/2022/RKI196	2022	Homo sapiens	OP215208
OP215209	Wed Jun 26 18:51:23 CDT 2024	MPXV; 2; B_isolate MPXV/Germany/2022/RKI198	197139	OP215209	MPXV_OP215209	Virus_dsDNA_env; Poxviridae; Chordopoxvirinae; Orthopoxvirus; MPXV; 2; B	Monkeypox virus	Linear	OP215209 DEU 2022	West Af	3	2	Europe	DEU	Germany	B	Human	MPXV/Germany/2022/RKI198	2022	Homo sapiens	OP215209
OP215210	Wed Jun 26 18:51:23 CDT 2024	MPXV; 2; B_isolate MPXV/Germany/2022/RKI202	197140	OP215210	MPXV_OP215210	Virus_dsDNA_env; Poxviridae; Chordopoxvirinae; Orthopoxvirus; MPXV; 2; B	Monkeypox virus	Linear	OP215210 DEU 2022	West Af	3	2	Europe	DEU	Germany	B	Human	MPXV/Germany/2022/RKI202	2022	Homo sapiens	OP215210
OP215211	Wed Jun 26 18:51:23 CDT 2024	MPXV; 2; B_isolate MPXV/Germany/2022/RKI203	197140	OP215211	MPXV_OP215211	Virus_dsDNA_env; Poxviridae; Chordopoxvirinae; Orthopoxvirus; MPXV; 2; B	Monkeypox virus	Linear	OP215211 DEU 2022	West Af	3	2	Europe	DEU	Germany	B	Human	MPXV/Germany/2022/RKI203	2022	Homo sapiens	OP215211
OP215213	Wed Jun 26 18:51:23 CDT 2024	MPXV; 2; B_isolate MPXV/Germany/2022/RKI209	197139	OP215213	MPXV_OP215213	Virus_dsDNA_env; Poxviridae; Chordopoxvirinae; Orthopoxvirus; MPXV; 2; B	Monkeypox virus	Linear	OP215213 DEU 2022	West Af	3	2	Europe	DEU	Germany	B	Human	MPXV/Germany/2022/RKI209	2022	Homo sapiens	OP215213
OP215214	Wed Jun 26 18:51:23 CDT 2024	MPXV; 2; B_isolate MPXV/Germany/2022/RKI212	197139	OP215214	MPXV_OP215214	Virus_dsDNA_env; Poxviridae; Chordopoxvirinae; Orthopoxvirus; MPXV; 2; B	Monkeypox virus	Linear	OP215214 DEU 2022	West Af	3	2	Europe	DEU	Germany	B	Human	MPXV/Germany/2022/RKI212	2022	Homo sapiens	OP215214
OP215215	Wed Jun 26 18:51:23 CDT 2024	MPXV; 2; B_isolate MPXV/Germany/2022/RKI213	197139	OP215215	MPXV_OP215215	Virus_dsDNA_env; Poxviridae; Chordopoxvirinae; Orthopoxvirus; MPXV; 2; B	Monkeypox virus	Linear	OP215215 DEU 2022	West Af	3	2	Europe	DEU	Germany	B	Human	MPXV/Germany/2022/RKI213	2022	Homo sapiens	OP215215
OP215216	Wed Jun 26 18:51:23 CDT 2024	MPXV; 2; B_isolate MPXV/Germany/2022/RKI217	197115	OP215216	MPXV_OP215216	Virus_dsDNA_env; Poxviridae; Chordopoxvirinae; Orthopoxvirus; MPXV; 2; B	Monkeypox virus	Linear	OP215216 DEU 2022	West Af	3	2	Europe	DEU	Germany	B	Human	MPXV/Germany/2022/RKI217	2022	Homo sapiens	OP215216
OP215218	Wed Jun 26 18:51:23 CDT 2024	MPXV; 2; B_isolate MPXV/Germany/2022/RKI219	197140	OP215218	MPXV_OP215218	Virus_dsDNA_env; Poxviridae; Chordopoxvirinae; Orthopoxvirus; MPXV; 2; B	Monkeypox virus	Linear	OP215218 DEU 2022	West Af	3	2	Europe	DEU	Germany	B	Human	MPXV/Germany/2022/RKI219	2022	Homo sapiens	OP215218
OP215219	Wed Jun 26 18:51:23 CDT 2024	MPXV; 2; B_isolate MPXV/Germany/2022/RKI223	197140	OP215219	MPXV_OP215219	Virus_dsDNA_env; Poxviridae; Chordopoxvirinae; Orthopoxvirus; MPXV; 2; B	Monkeypox virus	Linear	OP215219 DEU 2022	West Af	3	2	Europe	DEU	Germany	B	Human	MPXV/Germany/2022/RKI223	2022	Homo sapiens	OP215219
OP215220	Wed Jun 26 18:51:23 CDT 2024	MPXV; 2; B_isolate MPXV/Germany/2022/RKI224	197140	OP215220	MPXV_OP215220	Virus_dsDNA_env; Poxviridae; Chordopoxvirinae; Orthopoxvirus; MPXV; 2; B	Monkeypox virus	Linear	OP215220 DEU 2022	West Af	3	2	Europe	DEU	Germany	B	Human	MPXV/Germany/2022/RKI224	2022	Homo sapiens	OP215220
OP215222	Wed Jun 26 18:51:23 CDT 2024	MPXV; 2; B_isolate MPXV/Germany/2022/RKI231	197140	OP215222	MPXV_OP215222	Virus_dsDNA_env; Poxviridae; Chordopoxvirinae; Orthopoxvirus; MPXV; 2; B	Monkeypox virus	Linear	OP215222 DEU 2022	West Af	3	2	Europe	DEU	Germany	B	Human	MPXV/Germany/2022/RKI231	2022	Homo sapiens	OP215222
OP215223	Wed Jun 26 18:51:23 CDT 2024	MPXV; 2; B_isolate MPXV/Germany/2022/RKI234	197140	OP215223	MPXV_OP215223	Virus_dsDNA_env; Poxviridae; Chordopoxvirinae; Orthopoxvirus; MPXV; 2; B	Monkeypox virus	Linear	OP215223 DEU 2022	West Af	3	2	Europe	DEU	Germany	B	Human	MPXV/Germany/2022/RKI234	2022	Homo sapiens	OP215223
OP215224	Wed Jun 26 18:51:23 CDT 2024	MPXV; 2; B_isolate MPXV/Germany/2022/RKI235	197139	OP215224	MPXV_OP215224	Virus_dsDNA_env; Poxviridae; Chordopoxvirinae; Orthopoxvirus; MPXV; 2; B	Monkeypox virus	Linear	OP215224 DEU 2022	West Af	3	2	Europe	DEU	Germany	B	Human	MPXV/Germany/2022/RKI235	2022	Homo sapiens	OP215224
OP215225	Wed Jun 26 18:51:23 CDT 2024	MPXV; 2; B_isolate MPXV/Germany/2022/RKI240	197139	OP215225	MPXV_OP215225	Virus_dsDNA_env; Poxviridae; Chordopoxvirinae; Orthopoxvirus; MPXV; 2; B	Monkeypox virus	Linear	OP215225 DEU 2022	West Af	3	2	Europe	DEU	Germany	B	Human	MPXV/Germany/2022/RKI240	2022	Homo sapiens	OP215225
OP215226	Wed Jun 26 18:51:23 CDT 2024	MPXV; 2; B_isolate MPXV/Germany/2022/RKI241	197139	OP215226	MPXV_OP215226	Virus_dsDNA_env; Poxviridae; Chordopoxvirinae; Orthopoxvirus; MPXV; 2; B	Monkeypox virus	Linear	OP215226 DEU 2022	West Af	3	2	Europe	DEU	Germany	B	Human	MPXV/Germany/2022/RKI241	2022	Homo sapiens	OP215226
OP215227	Wed Jun 26 18:51:23 CDT 2024	MPXV; 2; B_isolate MPXV/Germany/2022/RKI242	197140	OP215227	MPXV_OP215227	Virus_dsDNA_env; Poxviridae; Chordopoxvirinae; Orthopoxvirus; MPXV; 2; B	Monkeypox virus	Linear	OP215227 DEU 2022	West Af	3	2	Europe	DEU	Germany	B	Human	MPXV/Germany/2022/RKI242	2022	Homo sapiens	OP215227
OP215228	Wed Jun 26 18:51:23 CDT 2024	MPXV; 2; B_isolate MPXV/Germany/2022/RKI249	197139	OP215228	MPXV_OP215228	Virus_dsDNA_env; Poxviridae; Chordopoxvirinae; Orthopoxvirus; MPXV; 2; B	Monkeypox virus	Linear	OP215228 DEU 2022	West Af	3	2	Europe	DEU	Germany	B	Human	MPXV/Germany/2022/RKI249	2022	Homo sapiens	OP215228
OP215229	Wed Jun 26 18:51:23 CDT 2024	MPXV; 2; B_isolate MPXV/Germany/2022/RKI250	197140	OP215229	MPXV_OP215229	Virus_dsDNA_env; Poxviridae; Chordopoxvirinae; Orthopoxvirus; MPXV; 2; B	Monkeypox virus	Linear	OP215229 DEU 2022	West Af	3	2	Europe	DEU	Germany	B	Human	MPXV/Germany/2022/RKI250	2022	Homo sapiens	OP215229
OP215230	Wed Jun 26 18:51:23 CDT 2024	MPXV; 2; B_isolate MPXV/Germany/2022/RKI187	197139	OP215230	MPXV_OP215230	Virus_dsDNA_env; Poxviridae; Chordopoxvirinae; Orthopoxvirus; MPXV; 2; B	Monkeypox virus	Linear	OP215230 DEU 2022	West Af	3	2	Europe	DEU	Germany	B	Human	MPXV/Germany/2022/RKI187	2022	Homo sapiens	OP215230
OP215231	Wed Jun 26 18:51:23 CDT 2024	MPXV; 2; B_isolate MPXV/Germany/2022/RKI189	197139	OP215231	MPXV_OP215231	Virus_dsDNA_env; Poxviridae; Chordopoxvirinae; Orthopoxvirus; MPXV; 2; B	Monkeypox virus	Linear	OP215231 DEU 2022	West Af	3	2	Europe	DEU	Germany	B	Human	MPXV/Germany/2022/RKI189	2022	Homo sapiens	OP215231
OP215232	Wed Jun 26 18:51:23 CDT 2024	MPXV; 2; B_isolate MPXV/Germany/2022/RKI190	197140	OP215232	MPXV_OP215232	Virus_dsDNA_env; Poxviridae; Chordopoxvirinae; Orthopoxvirus; MPXV; 2; B	Monkeypox virus	Linear	OP215232 DEU 2022	West Af	3	2	Europe	DEU	Germany	B	Human	MPXV/Germany/2022/RKI190	2022	Homo sapiens	OP215232
OP215233	Wed Jun 26 18:51:23 CDT 2024	MPXV; 2; B_isolate MPXV/Germany/2022/RKI191	197139	OP215233	MPXV_OP215233	Virus_dsDNA_env; Poxviridae; Chordopoxvirinae; Orthopoxvirus; MPXV; 2; B	Monkeypox virus	Linear	OP215233 DEU 2022	West Af	3	2	Europe	DEU	Germany	B	Human	MPXV/Germany/2022/RKI191	2022	Homo sapiens	OP215233
OP215234	Wed Jun 26 18:51:23 CDT 2024	MPXV; 2; B_isolate MPXV/Germany/2022/RKI192	197139	OP215234	MPXV_OP215234	Virus_dsDNA_env; Poxviridae; Chordopoxvirinae; Orthopoxvirus; MPXV; 2; B	Monkeypox virus	Linear	OP215234 DEU 2022	West Af	3	2	Europe	DEU	Germany	B	Human	MPXV/Germany/2022/RKI192	2022	Homo sapiens	OP215234
OP215235	Wed Jun 26 18:51:23 CDT 2024	MPXV; 2; B_isolate MPXV/Germany/2022/RKI193	197139	OP215235	MPXV_OP215235	Virus_dsDNA_env; Poxviridae; Chordopoxvirinae; Orthopoxvirus; MPXV; 2; B	Monkeypox virus	Linear	OP215235 DEU 2022	West Af	3	2	Europe	DEU	Germany	B	Human	MPXV/Germany/2022/RKI193	2022	Homo sapiens	OP215235
OP215236	Wed Jun 26 18:51:23 CDT 2024	MPXV; 2; B_isolate MPXV/Germany/2022/RKI194	197139	OP215236	MPXV_OP215236	Virus_dsDNA_env; Poxviridae; Chordopoxvirinae; Orthopoxvirus; MPXV; 2; B	Monkeypox virus	Linear	OP215236 DEU 2022	West Af	3	2	Europe	DEU	Germany	B	Human	MPXV/Germany/2022/RKI194	2022	Homo sapiens	OP215236
OP215237	Wed Jun 26 18:51:23 CDT 2024	MPXV; 2; B_isolate MPXV/Germany/2022/RKI195	197140	OP215237	MPXV_OP215237	Virus_dsDNA_env; Poxviridae; Chordopoxvirinae; Orthopoxvirus; MPXV; 2; B	Monkeypox virus	Linear	OP215237 DEU 2022	West Af	3	2	Europe	DEU	Germany	B	Human	MPXV/Germany/2022/RKI195	2022	Homo sapiens	OP215237
OP215239	Wed Jun 26 18:51:23 CDT 2024	MPXV; 2; B_isolate MPXV/Germany/2022/RKI199	197140	OP215239	MPXV_OP215239	Virus_dsDNA_env; Poxviridae; Chordopoxvirinae; Orthopoxvirus; MPXV; 2; B	Monkeypox virus	Linear	OP215239 DEU 2022	West Af	3	2	Europe	DEU	Germany	B	Human	MPXV/Germany/2022/RKI199	2022	Homo sapiens	OP215239
OP215241	Wed Jun 26 18:51:23 CDT 2024	MPXV; 2; B_isolate MPXV/Germany/2022/RKI201	197139	OP215241	MPXV_OP215241	Virus_dsDNA_env; Poxviridae; Chordopoxvirinae; Orthopoxvirus; MPXV; 2; B	Monkeypox virus	Linear	OP215241 DEU 2022	West Af	3	2	Europe	DEU	Germany	B	Human	MPXV/Germany/2022/RKI201	2022	Homo sapiens	OP215241
OP215242	Wed Jun 26 18:51:23 CDT 2024	MPXV; 2; B_isolate MPXV/Germany/2022/RKI205	197140	OP215242	MPXV_OP215242	Virus_dsDNA_env; Poxviridae; Chordopoxvirinae; Orthopoxvirus; MPXV; 2; B	Monkeypox virus	Linear	OP215242 DEU 2022	West Af	3	2	Europe	DEU	Germany	B	Human	MPXV/Germany/2022/RKI205	2022	Homo sapiens	OP215242
OP215243	Wed Jun 26 18:51:23 CDT 2024	MPXV; 2; B_isolate MPXV/Germany/2022/RKI206	197139	OP215243	MPXV_OP215243	Virus_dsDNA_env; Poxviridae; Chordopoxvirinae; Orthopoxvirus; MPXV; 2; B	Monkeypox virus	Linear	OP215243 DEU 2022	West Af	3	2	Europe	DEU	Germany	B	Human	MPXV/Germany/2022/RKI206	2022	Homo sapiens	OP215243
OP215244	Wed Jun 26 18:51:23 CDT 2024	MPXV; 2; B_isolate MPXV/Germany/2022/RKI207	197139	OP215244	MPXV_OP215244	Virus_dsDNA_env; Poxviridae; Chordopoxvirinae; Orthopoxvirus; MPXV; 2; B	Monkeypox virus	Linear	OP215244 DEU 2022	West Af	3	2	Europe	DEU	Germany	B	Human	MPXV/Germany/2022/RKI207	2022	Homo sapiens	OP215244
OP215245	Wed Jun 26 18:51:23 CDT 2024	MPXV; 2; B_isolate MPXV/Germany/2022/RKI208	197139	OP215245	MPXV_OP215245	Virus_dsDNA_env; Poxviridae; Chordopoxvirinae; Orthopoxvirus; MPXV; 2; B	Monkeypox virus	Linear	OP215245 DEU 2022	West Af	3	2	Europe	DEU	Germany	B	Human	MPXV/Germany/2022/RKI208	2022	Homo sapiens	OP215245
OP215246	Wed Jun 26 18:51:23 CDT 2024	MPXV; 2; B_isolate MPXV/Germany/2022/RKI210	197139	OP215246	MPXV_OP215246	Virus_dsDNA_env; Poxviridae; Chordopoxvirinae; Orthopoxvirus; MPXV; 2; B	Monkeypox virus	Linear	OP215246 DEU 2022	West Af	3	2	Europe	DEU	Germany	B	Human	MPXV/Germany/2022/RKI210	2022	Homo sapiens	OP215246
OP215248	Wed Jun 26 18:51:23 CDT 2024	MPXV; 2; B_isolate MPXV/Germany/2022/RKI215	197139	OP215248	MPXV_OP215248	Virus_dsDNA_env; Poxviridae; Chordopoxvirinae; Orthopoxvirus; MPXV; 2; B	Monkeypox virus	Linear	OP215248 DEU 2022	West Af	3	2	Europe	DEU	Germany	B	Human	MPXV/Germany/2022/RKI215	2022	Homo sapiens	OP215248
OP215250	Wed Jun 26 18:51:23 CDT 2024	MPXV; 2; B_isolate MPXV/Germany/2022/RKI220	197140	OP215250	MPXV_OP215250	Virus_dsDNA_env; Poxviridae; Chordopoxvirinae; Orthopoxvirus; MPXV; 2; B	Monkeypox virus	Linear	OP215250 DEU 2022	West Af	3	2	Europe	DEU	Germany	B	Human	MPXV/Germany/2022/RKI220	2022	Homo sapiens	OP215250
OP215252	Wed Jun 26 18:51:23 CDT 2024	MPXV; 2; B_isolate MPXV/Germany/2022/RKI222	197139	OP215252	MPXV_OP215252	Virus_dsDNA_env; Poxviridae; Chordopoxvirinae; Orthopoxvirus; MPXV; 2; B	Monkeypox virus	Linear	OP215252 DEU 2022	West Af	3	2	Europe	DEU	Germany	B	Human	MPXV/Germany/2022/RKI222	2022	Homo sapiens	OP215252
OP215253	Wed Jun 26 18:51:23 CDT 2024	MPXV; 2; B_isolate MPXV/Germany/2022/RKI225	197139	OP215253	MPXV_OP215253	Virus_dsDNA_env; Poxviridae; Chordopoxvirinae; Orthopoxvirus; MPXV; 2; B	Monkeypox virus	Linear	OP215253 DEU 2022	West Af	3	2	Europe	DEU	Germany	B	Human	MPXV/Germany/2022/RKI225	2022	Homo sapiens	OP215253
OP215254	Wed Jun 26 18:51:23 CDT 2024	MPXV; 2; B_isolate MPXV/Germany/2022/RKI226	197139	OP215254	MPXV_OP215254	Virus_dsDNA_env; Poxviridae; Chordopoxvirinae; Orthopoxvirus; MPXV; 2; B	Monkeypox virus	Linear	OP215254 DEU 2022	West Af	3	2	Europe	DEU	Germany	B	Human	MPXV/Germany/2022/RKI226	2022	Homo sapiens	OP215254
OP215255	Wed Jun 26 18:51:23 CDT 2024	MPXV; 2; B_isolate MPXV/Germany/2022/RKI227	197140	OP215255	MPXV_OP215255	Virus_dsDNA_env; Poxviridae; Chordopoxvirinae; Orthopoxvirus; MPXV; 2; B	Monkeypox virus	Linear	OP215255 DEU 2022	West Af	3	2	Europe	DEU	Germany	B	Human	MPXV/Germany/2022/RKI227	2022	Homo sapiens	OP215255
OP215256	Wed Jun 26 18:51:23 CDT 2024	MPXV; 2; B_isolate MPXV/Germany/2022/RKI228	197140	OP215256	MPXV_OP215256	Virus_dsDNA_env; Poxviridae; Chordopoxvirinae; Orthopoxvirus; MPXV; 2; B	Monkeypox virus	Linear	OP215256 DEU 2022	West Af	3	2	Europe	DEU	Germany	B	Human	MPXV/Germany/2022/RKI228	2022	Homo sapiens	OP215256
OP215257	Wed Jun 26 18:51:23 CDT 2024	MPXV; 2; B_isolate MPXV/Germany/2022/RKI230	197139	OP215257	MPXV_OP215257	Virus_dsDNA_env; Poxviridae; Chordopoxvirinae; Orthopoxvirus; MPXV; 2; B	Monkeypox virus	Linear	OP215257 DEU 2022	West Af	3	2	Europe	DEU	Germany	B	Human	MPXV/Germany/2022/RKI230	2022	Homo sapiens	OP215257
OP215258	Wed Jun 26 18:51:23 CDT 2024	MPXV; 2; B_isolate MPXV/Germany/2022/RKI232	197140	OP215258	MPXV_OP215258	Virus_dsDNA_env; Poxviridae; Chordopoxvirinae; Orthopoxvirus; MPXV; 2; B	Monkeypox virus	Linear	OP215258 DEU 2022	West Af	3	2	Europe	DEU	Germany	B	Human	MPXV/Germany/2022/RKI232	2022	Homo sapiens	OP215258
OP215260	Wed Jun 26 18:51:23 CDT 2024	MPXV; 2; B_isolate MPXV/Germany/2022/RKI236	197139	OP215260	MPXV_OP215260	Virus_dsDNA_env; Poxviridae; Chordopoxvirinae; Orthopoxvirus; MPXV; 2; B	Monkeypox virus	Linear	OP215260 DEU 2022	West Af	3	2	Europe	DEU	Germany	B	Human	MPXV/Germany/2022/RKI236	2022	Homo sapiens	OP215260
OP215263	Wed Jun 26 18:51:23 CDT 2024	MPXV; 2; B_isolate MPXV/Germany/2022/RKI239	197141	OP215263	MPXV_OP215263	Virus_dsDNA_env; Poxviridae; Chordopoxvirinae; Orthopoxvirus; MPXV; 2; B	Monkeypox virus	Linear	OP215263 DEU 2022	West Af	3	2	Europe	DEU	Germany	B	Human	MPXV/Germany/2022/RKI239	2022	Homo sapiens	OP215263
OP215264	Wed Jun 26 18:51:23 CDT 2024	MPXV; 2; B_isolate MPXV/Germany/2022/RKI244	197139	OP215264	MPXV_OP215264	Virus_dsDNA_env; Poxviridae; Chordopoxvirinae; Orthopoxvirus; MPXV; 2; B	Monkeypox virus	Linear	OP215264 DEU 2022	West Af	3	2	Europe	DEU	Germany	B	Human	MPXV/Germany/2022/RKI244	2022	Homo sapiens	OP215264
OP215265	Wed Jun 26 18:51:23 CDT 2024	MPXV; 2; B_isolate MPXV/Germany/2022/RKI245	197139	OP215265	MPXV_OP215265	Virus_dsDNA_env; Poxviridae; Chordopoxvirinae; Orthopoxvirus; MPXV; 2; B	Monkeypox virus	Linear	OP215265 DEU 2022	West Af	3	2	Europe	DEU	Germany	B	Human	MPXV/Germany/2022/RKI245	2022	Homo sapiens	OP215265
OP215266	Wed Jun 26 18:51:23 CDT 2024	MPXV; 2; B_isolate MPXV/Germany/2022/RKI246	197139	OP215266	MPXV_OP215266	Virus_dsDNA_env; Poxviridae; Chordopoxvirinae; Orthopoxvirus; MPXV; 2; B	Monkeypox virus	Linear	OP215266 DEU 2022	West Af	3	2	Europe	DEU	Germany	B	Human	MPXV/Germany/2022/RKI246	2022	Homo sapiens	OP215266
OP215267	Wed Jun 26 18:51:23 CDT 2024	MPXV; 2; B_isolate MPXV/Germany/2022/RKI247	197139	OP215267	MPXV_OP215267	Virus_dsDNA_env; Poxviridae; Chordopoxvirinae; Orthopoxvirus; MPXV; 2; B	Monkeypox virus	Linear	OP215267 DEU 2022	West Af	3	2	Europe	DEU	Germany	B	Human	MPXV/Germany/2022/RKI247	2022	Homo sapiens	OP215267
OP215268	Wed Jun 26 18:51:23 CDT 2024	MPXV; 2; B_isolate MPXV/Germany/2022/RKI248	197140	OP215268	MPXV_OP215268	Virus_dsDNA_env; Poxviridae; Chordopoxvirinae; Orthopoxvirus; MPXV; 2; B	Monkeypox virus	Linear	OP215268 DEU 2022	West Af	3	2	Europe	DEU	Germany	B	Human	MPXV/Germany/2022/RKI248	2022	Homo sapiens	OP215268
OP215269	Wed Jun 26 18:51:23 CDT 2024	MPXV; 2; B_isolate MPXV/Germany/2022/RKI252	197139	OP215269	MPXV_OP215269	Virus_dsDNA_env; Poxviridae; Chordopoxvirinae; Orthopoxvirus; MPXV; 2; B	Monkeypox virus	Linear	OP215269 DEU 2022	West Af	3	2	Europe	DEU	Germany	B	Human	MPXV/Germany/2022/RKI252	2022	Homo sapiens	OP215269
OP215270	Wed Jun 26 18:51:23 CDT 2024	MPXV; 2; B_isolate MPXV/Germany/2022/RKI255	197139	OP215270	MPXV_OP215270	Virus_dsDNA_env; Poxviridae; Chordopoxvirinae; Orthopoxvirus; MPXV; 2; B	Monkeypox virus	Linear	OP215270 DEU 2022	West Af	3	2	Europe	DEU	Germany	B	Human	MPXV/Germany/2022/RKI255	2022	Homo sapiens	OP215270
OP215271	Wed Jun 26 18:51:23 CDT 2024	MPXV; 2; B_isolate MPXV/Germany/2022/RKI269	197139	OP215271	MPXV_OP215271	Virus_dsDNA_env; Poxviridae; Chordopoxvirinae; Orthopoxvirus; MPXV; 2; B	Monkeypox virus	Linear	OP215271 DEU 2022	West Af	3	2	Europe	DEU	Germany	B	Human	MPXV/Germany/2022/RKI269	2022	Homo sapiens	OP215271
OP215272	Wed Jun 26 18:51:23 CDT 2024	MPXV; 2; B_isolate MPXV/Germany/2022/RKI253	197117	OP215272	MPXV_OP215272	Virus_dsDNA_env; Poxviridae; Chordopoxvirinae; Orthopoxvirus; MPXV; 2; B	Monkeypox virus	Linear	OP215272 DEU 2022	West Af	3	2	Europe	DEU	Germany	B	Human	MPXV/Germany/2022/RKI253	2022	Homo sapiens	OP215272
OP215273	Wed Jun 26 18:51:23 CDT 2024	MPXV; 2; B_isolate MPXV/Germany/2022/RKI251	197139	OP215273	MPXV_OP215273	Virus_dsDNA_env; Poxviridae; Chordopoxvirinae; Orthopoxvirus; MPXV; 2; B	Monkeypox virus	Linear	OP215273 DEU 2022	West Af	3	2	Europe	DEU	Germany	B	Human	MPXV/Germany/2022/RKI251	2022	Homo sapiens	OP215273
OP215274	Wed Jun 26 18:51:23 CDT 2024	MPXV; 2; B_isolate MPXV/Germany/2022/RKI254	197139	OP215274	MPXV_OP215274	Virus_dsDNA_env; Poxviridae; Chordopoxvirinae; Orthopoxvirus; MPXV; 2; B	Monkeypox virus	Linear	OP215274 DEU 2022	West Af	3	2	Europe	DEU	Germany	B	Human	MPXV/Germany/2022/RKI254	2022	Homo sapiens	OP215274
OP215275	Wed Jun 26 18:51:23 CDT 2024	MPXV; 2; B_isolate MPXV/Germany/2022/RKI256	197139	OP215275	MPXV_OP215275	Virus_dsDNA_env; Poxviridae; Chordopoxvirinae; Orthopoxvirus; MPXV; 2; B	Monkeypox virus	Linear	OP215275 DEU 2022	West Af	3	2	Europe	DEU	Germany	B	Human	MPXV/Germany/2022/RKI256	2022	Homo sapiens	OP215275
OP215277	Wed Jun 26 18:51:23 CDT 2024	MPXV; 2; B_isolate MPXV/Germany/2022/RKI258	197139	OP215277	MPXV_OP215277	Virus_dsDNA_env; Poxviridae; Chordopoxvirinae; Orthopoxvirus; MPXV; 2; B	Monkeypox virus	Linear	OP215277 DEU 2022	West Af	3	2	Europe	DEU	Germany	B	Human	MPXV/Germany/2022/RKI258	2022	Homo sapiens	OP215277
OP215278	Wed Jun 26 18:51:23 CDT 2024	MPXV; 2; B_isolate MPXV/Germany/2022/RKI259	197139	OP215278	MPXV_OP215278	Virus_dsDNA_env; Poxviridae; Chordopoxvirinae; Orthopoxvirus; MPXV; 2; B	Monkeypox virus	Linear	OP215278 DEU 2022	West Af	3	2	Europe	DEU	Germany	B	Human	MPXV/Germany/2022/RKI259	2022	Homo sapiens	OP215278
OP215279	Wed Jun 26 18:51:23 CDT 2024	MPXV; 2; B_isolate MPXV/Germany/2022/RKI260	197140	OP215279	MPXV_OP215279	Virus_dsDNA_env; Poxviridae; Chordopoxvirinae; Orthopoxvirus; MPXV; 2; B	Monkeypox virus	Linear	OP215279 DEU 2022	West Af	3	2	Europe	DEU	Germany	B	Human	MPXV/Germany/2022/RKI260	2022	Homo sapiens	OP215279
OP215280	Wed Jun 26 18:51:23 CDT 2024	MPXV; 2; B_isolate MPXV/Germany/2022/RKI261	197140	OP215280	MPXV_OP215280	Virus_dsDNA_env; Poxviridae; Chordopoxvirinae; Orthopoxvirus; MPXV; 2; B	Monkeypox virus	Linear	OP215280 DEU 2022	West Af	3	2	Europe	DEU	Germany	B	Human	MPXV/Germany/2022/RKI261	2022	Homo sapiens	OP215280
OP215281	Wed Jun 26 18:51:23 CDT 2024	MPXV; 2; B_isolate MPXV/Germany/2022/RKI262	197139	OP215281	MPXV_OP215281	Virus_dsDNA_env; Poxviridae; Chordopoxvirinae; Orthopoxvirus; MPXV; 2; B	Monkeypox virus	Linear	OP215281 DEU 2022	West Af	3	2	Europe	DEU	Germany	B	Human	MPXV/Germany/2022/RKI262	2022	Homo sapiens	OP215281
OP215283	Wed Jun 26 18:51:23 CDT 2024	MPXV; 2; B_isolate MPXV/Germany/2022/RKI264	197139	OP215283	MPXV_OP215283	Virus_dsDNA_env; Poxviridae; Chordopoxvirinae; Orthopoxvirus; MPXV; 2; B	Monkeypox virus	Linear	OP215283 DEU 2022	West Af	3	2	Europe	DEU	Germany	B	Human	MPXV/Germany/2022/RKI264	2022	Homo sapiens	OP215283
OP215284	Wed Jun 26 18:51:23 CDT 2024	MPXV; 2; B_isolate MPXV/Germany/2022/RKI265	197140	OP215284	MPXV_OP215284	Virus_dsDNA_env; Poxviridae; Chordopoxvirinae; Orthopoxvirus; MPXV; 2; B	Monkeypox virus	Linear	OP215284 DEU 2022	West Af	3	2	Europe	DEU	Germany	B	Human	MPXV/Germany/2022/RKI265	2022	Homo sapiens	OP215284
OP215285	Wed Jun 26 18:51:23 CDT 2024	MPXV; 2; B_isolate MPXV/Germany/2022/RKI266	197139	OP215285	MPXV_OP215285	Virus_dsDNA_env; Poxviridae; Chordopoxvirinae; Orthopoxvirus; MPXV; 2; B	Monkeypox virus	Linear	OP215285 DEU 2022	West Af	3	2	Europe	DEU	Germany	B	Human	MPXV/Germany/2022/RKI266	2022	Homo sapiens	OP215285
OP215286	Wed Jun 26 18:51:23 CDT 2024	MPXV; 2; B_isolate MPXV/Germany/2022/RKI267	197140	OP215286	MPXV_OP215286	Virus_dsDNA_env; Poxviridae; Chordopoxvirinae; Orthopoxvirus; MPXV; 2; B	Monkeypox virus	Linear	OP215286 DEU 2022	West Af	3	2	Europe	DEU	Germany	B	Human	MPXV/Germany/2022/RKI267	2022	Homo sapiens	OP215286
OP215287	Wed Jun 26 18:51:23 CDT 2024	MPXV; 2; B_isolate MPXV/Germany/2022/RKI268	197140	OP215287	MPXV_OP215287	Virus_dsDNA_env; Poxviridae; Chordopoxvirinae; Orthopoxvirus; MPXV; 2; B	Monkeypox virus	Linear	OP215287 DEU 2022	West Af	3	2	Europe	DEU	Germany	B	Human	MPXV/Germany/2022/RKI268	2022	Homo sapiens	OP215287
OP215288	Wed Jun 26 18:51:23 CDT 2024	MPXV; 2; B_isolate MPXV/Germany/2022/RKI270	197139	OP215288	MPXV_OP215288	Virus_dsDNA_env; Poxviridae; Chordopoxvirinae; Orthopoxvirus; MPXV; 2; B	Monkeypox virus	Linear	OP215288 DEU 2022	West Af	3	2	Europe	DEU	Germany	B	Human	MPXV/Germany/2022/RKI270	2022	Homo sapiens	OP215288
OP225960	Wed Jun 26 18:51:23 CDT 2024	MPXV; 2; B_isolate MPXV_USA_2022_NY0013	197152	OP225960	MPXV_OP225960	Virus_dsDNA_env; Poxviridae; Chordopoxvirinae; Orthopoxvirus; MPXV; 2; B	Monkeypox virus	Linear	OP225960 USA 2022	West Af	3	2	N America	USA	USA: NY	B	Human	MPXV_USA_2022_NY0013	2022	Homo sapiens	OP225960
OP225962	Wed Jun 26 18:51:23 CDT 2024	MPXV; 2; B_isolate MPXV_USA_2022_IL0020	197151	OP225962	MPXV_OP225962	Virus_dsDNA_env; Poxviridae; Chordopoxvirinae; Orthopoxvirus; MPXV; 2; B	Monkeypox virus	Linear	OP225962 USA 2022	West Af	3	2	N America	USA	USA: IL	B	Human	MPXV_USA_2022_IL0020	2022	Homo sapiens	OP225962
OP225963	Wed Jun 26 18:51:23 CDT 2024	MPXV; 2; B_isolate MPXV_USA_2022_CO0006	197155	OP225963	MPXV_OP225963	Virus_dsDNA_env; Poxviridae; Chordopoxvirinae; Orthopoxvirus; MPXV; 2; B	Monkeypox virus	Linear	OP225963 USA 2022	West Af	3	2	N America	USA	USA: CO	B	Human	MPXV_USA_2022_CO0006	2022	Homo sapiens	OP225963
OP225964	Wed Jun 26 18:51:23 CDT 2024	MPXV; 2; B_isolate MPXV_USA_2022_IL0024	197176	OP225964	MPXV_OP225964	Virus_dsDNA_env; Poxviridae; Chordopoxvirinae; Orthopoxvirus; MPXV; 2; B	Monkeypox virus	Linear	OP225964 USA 2022	West Af	3	2	N America	USA	USA: IL	B	Human	MPXV_USA_2022_IL0024	2022	Homo sapiens	OP225964
OP225965	Wed Jun 26 18:51:23 CDT 2024	MPXV; 2; B_isolate MPXV_USA_2022_FL0012	197147	OP225965	MPXV_OP225965	Virus_dsDNA_env; Poxviridae; Chordopoxvirinae; Orthopoxvirus; MPXV; 2; B	Monkeypox virus	Linear	OP225965 USA 2022	West Af	3	2	N America	USA	USA: FL	B	Human	MPXV_USA_2022_FL0012	2022	Homo sapiens	OP225965
OP225966	Wed Jun 26 18:51:23 CDT 2024	MPXV; 2; B_isolate MPXV_USA_2022_IL0023	197147	OP225966	MPXV_OP225966	Virus_dsDNA_env; Poxviridae; Chordopoxvirinae; Orthopoxvirus; MPXV; 2; B	Monkeypox virus	Linear	OP225966 USA 2022	West Af	3	2	N America	USA	USA: IL	B	Human	MPXV_USA_2022_IL0023	2022	Homo sapiens	OP225966
OP225967	Wed Jun 26 18:51:23 CDT 2024	MPXV; 2; B_isolate MPXV_USA_2022_FL0011	197147	OP225967	MPXV_OP225967	Virus_dsDNA_env; Poxviridae; Chordopoxvirinae; Orthopoxvirus; MPXV; 2; B	Monkeypox virus	Linear	OP225967 USA 2022	West Af	3	2	N America	USA	USA: FL	B	Human	MPXV_USA_2022_FL0011	2022	Homo sapiens	OP225967
OP225968	Wed Jun 26 18:51:23 CDT 2024	MPXV; 2; B_isolate MPXV_USA_2022_DC0005	197140	OP225968	MPXV_OP225968	Virus_dsDNA_env; Poxviridae; Chordopoxvirinae; Orthopoxvirus; MPXV; 2; B	Monkeypox virus	Linear	OP225968 USA 2022	West Af	3	2	N America	USA	USA: DC	B	Human	MPXV_USA_2022_DC0005	2022	Homo sapiens	OP225968
OP225969	Wed Jun 26 18:51:23 CDT 2024	MPXV; 2; B_isolate MPXV_USA_2022_IL0025	197143	OP225969	MPXV_OP225969	Virus_dsDNA_env; Poxviridae; Chordopoxvirinae; Orthopoxvirus; MPXV; 2; B	Monkeypox virus	Linear	OP225969 USA 2022	West Af	3	2	N America	USA	USA: IL	B	Human	MPXV_USA_2022_IL0025	2022	Homo sapiens	OP225969
OP235282	Wed Jun 26 18:51:23 CDT 2024	MPXV; 2; B_isolate QLDMX00001	197193	OP235282	MPXV_OP235282	Virus_dsDNA_env; Poxviridae; Chordopoxvirinae; Orthopoxvirus; MPXV; 2; B	Monkeypox virus	Linear	OP235282 AUS 2022	West Af	3	2	Australia	AUS	Australia	B	Human	QLDMX00001	2022	Homo sapiens	OP235282
OP257243	Wed Jun 26 18:51:23 CDT 2024	MPXV; 2; B_isolate MPXV/USA/WA-UW-089015/2022	197178	OP257243	MPXV_OP257243	Virus_dsDNA_env; Poxviridae; Chordopoxvirinae; Orthopoxvirus; MPXV; 2; B	Monkeypox virus	Linear	OP257243 USA 2022	West Af	3	2	N America	USA	USA: WA	B	Human	MPXV/USA/WA-UW-089015/2022	2022	Homo sapiens	OP257243
OP257244	Wed Jun 26 18:51:23 CDT 2024	MPXV; 2; B_isolate MPXV/USA/WA-UW-080268/2022	197176	OP257244	MPXV_OP257244	Virus_dsDNA_env; Poxviridae; Chordopoxvirinae; Orthopoxvirus; MPXV; 2; B	Monkeypox virus	Linear	OP257244 USA 2022	West Af	3	2	N America	USA	USA: WA	B	Human	MPXV/USA/WA-UW-080268/2022	2022	Homo sapiens	OP257244
OP257245	Wed Jun 26 18:51:23 CDT 2024	MPXV; 2; B_isolate MPXV/USA/WA-UW-084909/2022	197176	OP257245	MPXV_OP257245	Virus_dsDNA_env; Poxviridae; Chordopoxvirinae; Orthopoxvirus; MPXV; 2; B	Monkeypox virus	Linear	OP257245 USA 2022	West Af	3	2	N America	USA	USA: WA	B	Human	MPXV/USA/WA-UW-084909/2022	2022	Homo sapiens	OP257245
OP257246	Wed Jun 26 18:51:23 CDT 2024	MPXV; 2; B_isolate MPXV/USA/WA-UW-083578/2022	197176	OP257246	MPXV_OP257246	Virus_dsDNA_env; Poxviridae; Chordopoxvirinae; Orthopoxvirus; MPXV; 2; B	Monkeypox virus	Linear	OP257246 USA 2022	West Af	3	2	N America	USA	USA: WA	B	Human	MPXV/USA/WA-UW-083578/2022	2022	Homo sapiens	OP257246
OP257247	Wed Jun 26 18:51:23 CDT 2024	MPXV; 2; B_isolate MPXV/USA/WA-UW-088432/2022	197194	OP257247	MPXV_OP257247	Virus_dsDNA_env; Poxviridae; Chordopoxvirinae; Orthopoxvirus; MPXV; 2; B	Monkeypox virus	Linear	OP257247 USA 2022	West Af	3	2	N America	USA	USA: WA	B	Human	MPXV/USA/WA-UW-088432/2022	2022	Homo sapiens	OP257247
OP257248	Wed Jun 26 18:51:23 CDT 2024	MPXV; 2; B_isolate MPXV/USA/WA-UW-087424/2022	197176	OP257248	MPXV_OP257248	Virus_dsDNA_env; Poxviridae; Chordopoxvirinae; Orthopoxvirus; MPXV; 2; B	Monkeypox virus	Linear	OP257248 USA 2022	West Af	3	2	N America	USA	USA: WA	B	Human	MPXV/USA/WA-UW-087424/2022	2022	Homo sapiens	OP257248
OP257249	Wed Jun 26 18:51:23 CDT 2024	MPXV; 2; B_isolate MPXV/USA/WA-UW-081786/2022	197176	OP257249	MPXV_OP257249	Virus_dsDNA_env; Poxviridae; Chordopoxvirinae; Orthopoxvirus; MPXV; 2; B	Monkeypox virus	Linear	OP257249 USA 2022	West Af	3	2	N America	USA	USA: WA	B	Human	MPXV/USA/WA-UW-081786/2022	2022	Homo sapiens	OP257249
OP257250	Wed Jun 26 18:51:23 CDT 2024	MPXV; 2; B_isolate MPXV/USA/WA-UW-087527/2022	197178	OP257250	MPXV_OP257250	Virus_dsDNA_env; Poxviridae; Chordopoxvirinae; Orthopoxvirus; MPXV; 2; B	Monkeypox virus	Linear	OP257250 USA 2022	West Af	3	2	N America	USA	USA: WA	B	Human	MPXV/USA/WA-UW-087527/2022	2022	Homo sapiens	OP257250
OP257251	Wed Jun 26 18:51:23 CDT 2024	MPXV; 2; B_isolate MPXV/USA/WA-UW-081272/2022	197178	OP257251	MPXV_OP257251	Virus_dsDNA_env; Poxviridae; Chordopoxvirinae; Orthopoxvirus; MPXV; 2; B	Monkeypox virus	Linear	OP257251 USA 2022	West Af	3	2	N America	USA	USA: WA	B	Human	MPXV/USA/WA-UW-081272/2022	2022	Homo sapiens	OP257251
OP257252	Wed Jun 26 18:51:23 CDT 2024	MPXV; 2; B_isolate MPXV/USA/WA-UW-085937/2022	197176	OP257252	MPXV_OP257252	Virus_dsDNA_env; Poxviridae; Chordopoxvirinae; Orthopoxvirus; MPXV; 2; B	Monkeypox virus	Linear	OP257252 USA 2022	West Af	3	2	N America	USA	USA: WA	B	Human	MPXV/USA/WA-UW-085937/2022	2022	Homo sapiens	OP257252
OP257253	Wed Jun 26 18:51:23 CDT 2024	MPXV; 2; B_isolate MPXV/USA/WA-UW-088081/2022	197176	OP257253	MPXV_OP257253	Virus_dsDNA_env; Poxviridae; Chordopoxvirinae; Orthopoxvirus; MPXV; 2; B	Monkeypox virus	Linear	OP257253 USA 2022	West Af	3	2	N America	USA	USA: WA	B	Human	MPXV/USA/WA-UW-088081/2022	2022	Homo sapiens	OP257253
OP257254	Wed Jun 26 18:51:23 CDT 2024	MPXV; 2; B_isolate MPXV/USA/OH-UW-073812/2022	197176	OP257254	MPXV_OP257254	Virus_dsDNA_env; Poxviridae; Chordopoxvirinae; Orthopoxvirus; MPXV; 2; B	Monkeypox virus	Linear	OP257254 USA 2022	West Af	3	2	N America	USA	USA: OH	B	Human	MPXV/USA/OH-UW-073812/2022	2022	Homo sapiens	OP257254
OP257255	Wed Jun 26 18:51:23 CDT 2024	MPXV; 2; B_isolate MPXV/USA/OH-UW-073319/2022	197168	OP257255	MPXV_OP257255	Virus_dsDNA_env; Poxviridae; Chordopoxvirinae; Orthopoxvirus; MPXV; 2; B	Monkeypox virus	Linear	OP257255 USA 2022	West Af	3	2	N America	USA	USA: OH	B	Human	MPXV/USA/OH-UW-073319/2022	2022	Homo sapiens	OP257255
OP257256	Wed Jun 26 18:51:23 CDT 2024	MPXV; 2; B_isolate MPXV/USA/OH-UW-082260/2022	197176	OP257256	MPXV_OP257256	Virus_dsDNA_env; Poxviridae; Chordopoxvirinae; Orthopoxvirus; MPXV; 2; B	Monkeypox virus	Linear	OP257256 USA 2022	West Af	3	2	N America	USA	USA: OH	B	Human	MPXV/USA/OH-UW-082260/2022	2022	Homo sapiens	OP257256
OP257257	Wed Jun 26 18:51:23 CDT 2024	MPXV; 2; B_isolate MPXV/USA/WA-UW-080706/2022	197174	OP257257	MPXV_OP257257	Virus_dsDNA_env; Poxviridae; Chordopoxvirinae; Orthopoxvirus; MPXV; 2; B	Monkeypox virus	Linear	OP257257 USA 2022	West Af	3	2	N America	USA	USA: WA	B	Human	MPXV/USA/WA-UW-080706/2022	2022	Homo sapiens	OP257257
OP257258	Wed Jun 26 18:51:23 CDT 2024	MPXV; 2; B_isolate MPXV/USA/WA-UW-086040/2022	197176	OP257258	MPXV_OP257258	Virus_dsDNA_env; Poxviridae; Chordopoxvirinae; Orthopoxvirus; MPXV; 2; B	Monkeypox virus	Linear	OP257258 USA 2022	West Af	3	2	N America	USA	USA: WA	B	Human	MPXV/USA/WA-UW-086040/2022	2022	Homo sapiens	OP257258
OP257259	Wed Jun 26 18:51:23 CDT 2024	MPXV; 2; B_isolate MPXV/USA/WA-UW-085684/2022	197178	OP257259	MPXV_OP257259	Virus_dsDNA_env; Poxviridae; Chordopoxvirinae; Orthopoxvirus; MPXV; 2; B	Monkeypox virus	Linear	OP257259 USA 2022	West Af	3	2	N America	USA	USA: WA	B	Human	MPXV/USA/WA-UW-085684/2022	2022	Homo sapiens	OP257259
OP257260	Wed Jun 26 18:51:23 CDT 2024	MPXV; 2; B_isolate MPXV/USA/WA-UW-087006/2022	197176	OP257260	MPXV_OP257260	Virus_dsDNA_env; Poxviridae; Chordopoxvirinae; Orthopoxvirus; MPXV; 2; B	Monkeypox virus	Linear	OP257260 USA 2022	West Af	3	2	N America	USA	USA: WA	B	Human	MPXV/USA/WA-UW-087006/2022	2022	Homo sapiens	OP257260
OP257261	Wed Jun 26 18:51:23 CDT 2024	MPXV; 2; B_isolate MPXV/USA/WA-UW-084325/2022	197176	OP257261	MPXV_OP257261	Virus_dsDNA_env; Poxviridae; Chordopoxvirinae; Orthopoxvirus; MPXV; 2; B	Monkeypox virus	Linear	OP257261 USA 2022	West Af	3	2	N America	USA	USA: WA	B	Human	MPXV/USA/WA-UW-084325/2022	2022	Homo sapiens	OP257261
OP257262	Wed Jun 26 18:51:23 CDT 2024	MPXV; 2; B_isolate MPXV/USA/WA-UW-087619/2022	197176	OP257262	MPXV_OP257262	Virus_dsDNA_env; Poxviridae; Chordopoxvirinae; Orthopoxvirus; MPXV; 2; B	Monkeypox virus	Linear	OP257262 USA 2022	West Af	3	2	N America	USA	USA: WA	B	Human	MPXV/USA/WA-UW-087619/2022	2022	Homo sapiens	OP257262
OP257263	Wed Jun 26 18:51:23 CDT 2024	MPXV; 2; B_isolate MPXV/USA/WA-UW-089987/2022	197176	OP257263	MPXV_OP257263	Virus_dsDNA_env; Poxviridae; Chordopoxvirinae; Orthopoxvirus; MPXV; 2; B	Monkeypox virus	Linear	OP257263 USA 2022	West Af	3	2	N America	USA	USA: WA	B	Human	MPXV/USA/WA-UW-089987/2022	2022	Homo sapiens	OP257263
OP257264	Wed Jun 26 18:51:23 CDT 2024	MPXV; 2; B_isolate MPXV/USA/WA-UW-080976/2022	197193	OP257264	MPXV_OP257264	Virus_dsDNA_env; Poxviridae; Chordopoxvirinae; Orthopoxvirus; MPXV; 2; B	Monkeypox virus	Linear	OP257264 USA 2022	West Af	3	2	N America	USA	USA: WA	B	Human	MPXV/USA/WA-UW-080976/2022	2022	Homo sapiens	OP257264
OP257265	Wed Jun 26 18:51:23 CDT 2024	MPXV; 2; B_isolate MPXV/USA/WA-UW-089183/2022	197176	OP257265	MPXV_OP257265	Virus_dsDNA_env; Poxviridae; Chordopoxvirinae; Orthopoxvirus; MPXV; 2; B	Monkeypox virus	Linear	OP257265 USA 2022	West Af	3	2	N America	USA	USA: WA	B	Human	MPXV/USA/WA-UW-089183/2022	2022	Homo sapiens	OP257265
OP257266	Wed Jun 26 18:51:23 CDT 2024	MPXV; 2; B_isolate MPXV/USA/WA-UW-083179/2022	197176	OP257266	MPXV_OP257266	Virus_dsDNA_env; Poxviridae; Chordopoxvirinae; Orthopoxvirus; MPXV; 2; B	Monkeypox virus	Linear	OP257266 USA 2022	West Af	3	2	N America	USA	USA: WA	B	Human	MPXV/USA/WA-UW-083179/2022	2022	Homo sapiens	OP257266
OP257267	Wed Jun 26 18:51:23 CDT 2024	MPXV; 2; B_isolate MPXV/USA/WA-UW-084449/2022	197174	OP257267	MPXV_OP257267	Virus_dsDNA_env; Poxviridae; Chordopoxvirinae; Orthopoxvirus; MPXV; 2; B	Monkeypox virus	Linear	OP257267 USA 2022	West Af	3	2	N America	USA	USA: WA	B	Human	MPXV/USA/WA-UW-084449/2022	2022	Homo sapiens	OP257267
OP263627	Wed Jun 26 18:51:23 CDT 2024	MPXV; 2; B_isolate MPXV/Germany/2022/RKI272	197140	OP263627	MPXV_OP263627	Virus_dsDNA_env; Poxviridae; Chordopoxvirinae; Orthopoxvirus; MPXV; 2; B	Monkeypox virus	Linear	OP263627 DEU 2022	West Af	3	2	Europe	DEU	Germany	B	Human	MPXV/Germany/2022/RKI272	2022	Homo sapiens	OP263627
OP263628	Wed Jun 26 18:51:23 CDT 2024	MPXV; 2; B_isolate MPXV/Germany/2022/RKI274	197139	OP263628	MPXV_OP263628	Virus_dsDNA_env; Poxviridae; Chordopoxvirinae; Orthopoxvirus; MPXV; 2; B	Monkeypox virus	Linear	OP263628 DEU 2022	West Af	3	2	Europe	DEU	Germany	B	Human	MPXV/Germany/2022/RKI274	2022	Homo sapiens	OP263628
OP263629	Wed Jun 26 18:51:23 CDT 2024	MPXV; 2; B_isolate MPXV/Germany/2022/RKI273	197140	OP263629	MPXV_OP263629	Virus_dsDNA_env; Poxviridae; Chordopoxvirinae; Orthopoxvirus; MPXV; 2; B	Monkeypox virus	Linear	OP263629 DEU 2022	West Af	3	2	Europe	DEU	Germany	B	Human	MPXV/Germany/2022/RKI273	2022	Homo sapiens	OP263629
OP263630	Wed Jun 26 18:51:23 CDT 2024	MPXV; 2; B_isolate MPXV/Germany/2022/RKI275	197140	OP263630	MPXV_OP263630	Virus_dsDNA_env; Poxviridae; Chordopoxvirinae; Orthopoxvirus; MPXV; 2; B	Monkeypox virus	Linear	OP263630 DEU 2022	West Af	3	2	Europe	DEU	Germany	B	Human	MPXV/Germany/2022/RKI275	2022	Homo sapiens	OP263630
OP263631	Wed Jun 26 18:51:23 CDT 2024	MPXV; 2; B_isolate MPXV/Germany/2022/RKI276	197139	OP263631	MPXV_OP263631	Virus_dsDNA_env; Poxviridae; Chordopoxvirinae; Orthopoxvirus; MPXV; 2; B	Monkeypox virus	Linear	OP263631 DEU 2022	West Af	3	2	Europe	DEU	Germany	B	Human	MPXV/Germany/2022/RKI276	2022	Homo sapiens	OP263631
OP263632	Wed Jun 26 18:51:23 CDT 2024	MPXV; 2; B_isolate MPXV/Germany/2022/RKI277	197139	OP263632	MPXV_OP263632	Virus_dsDNA_env; Poxviridae; Chordopoxvirinae; Orthopoxvirus; MPXV; 2; B	Monkeypox virus	Linear	OP263632 DEU 2022	West Af	3	2	Europe	DEU	Germany	B	Human	MPXV/Germany/2022/RKI277	2022	Homo sapiens	OP263632
OP263633	Wed Jun 26 18:51:23 CDT 2024	MPXV; 2; B_isolate MPXV/Germany/2022/RKI278	197139	OP263633	MPXV_OP263633	Virus_dsDNA_env; Poxviridae; Chordopoxvirinae; Orthopoxvirus; MPXV; 2; B	Monkeypox virus	Linear	OP263633 DEU 2022	West Af	3	2	Europe	DEU	Germany	B	Human	MPXV/Germany/2022/RKI278	2022	Homo sapiens	OP263633
OP263634	Wed Jun 26 18:51:23 CDT 2024	MPXV; 2; B_isolate MPXV/Germany/2022/RKI279	197139	OP263634	MPXV_OP263634	Virus_dsDNA_env; Poxviridae; Chordopoxvirinae; Orthopoxvirus; MPXV; 2; B	Monkeypox virus	Linear	OP263634 DEU 2022	West Af	3	2	Europe	DEU	Germany	B	Human	MPXV/Germany/2022/RKI279	2022	Homo sapiens	OP263634
OP263635	Wed Jun 26 18:51:23 CDT 2024	MPXV; 2; B_isolate MPXV/Germany/2022/RKI280	197139	OP263635	MPXV_OP263635	Virus_dsDNA_env; Poxviridae; Chordopoxvirinae; Orthopoxvirus; MPXV; 2; B	Monkeypox virus	Linear	OP263635 DEU 2022	West Af	3	2	Europe	DEU	Germany	B	Human	MPXV/Germany/2022/RKI280	2022	Homo sapiens	OP263635
OP263636	Wed Jun 26 18:51:23 CDT 2024	MPXV; 2; B_isolate MPXV/Germany/2022/RKI281	197139	OP263636	MPXV_OP263636	Virus_dsDNA_env; Poxviridae; Chordopoxvirinae; Orthopoxvirus; MPXV; 2; B	Monkeypox virus	Linear	OP263636 DEU 2022	West Af	3	2	Europe	DEU	Germany	B	Human	MPXV/Germany/2022/RKI281	2022	Homo sapiens	OP263636
OP270022	Wed Jun 26 18:51:23 CDT 2024	MPXV; 2; B_isolate MPXV/CAN/UN-NML-3972/2022	197178	OP270022	MPXV_OP270022	Virus_dsDNA_env; Poxviridae; Chordopoxvirinae; Orthopoxvirus; MPXV; 2; B	Monkeypox virus	Linear	OP270022 CAN 2022	West Af	3	2	N America	CAN	Canada	B	Human	MPXV/CAN/UN-NML-3972/2022	2022	Homo sapiens	OP270022
OP270024	Wed Jun 26 18:51:23 CDT 2024	MPXV; 2; B_isolate MPXV/CAN/UN-NML-3976/2022	197175	OP270024	MPXV_OP270024	Virus_dsDNA_env; Poxviridae; Chordopoxvirinae; Orthopoxvirus; MPXV; 2; B	Monkeypox virus	Linear	OP270024 CAN 2022	West Af	3	2	N America	CAN	Canada	B	Human	MPXV/CAN/UN-NML-3976/2022	2022	Homo sapiens	OP270024
OP270471	Wed Jun 26 18:51:23 CDT 2024	MPXV; 2; B_isolate MPXV/Germany/2022/RKI282	197139	OP270471	MPXV_OP270471	Virus_dsDNA_env; Poxviridae; Chordopoxvirinae; Orthopoxvirus; MPXV; 2; B	Monkeypox virus	Linear	OP270471 DEU 2022	West Af	3	2	Europe	DEU	Germany	B	Human	MPXV/Germany/2022/RKI282	2022	Homo sapiens	OP270471
OP270473	Wed Jun 26 18:51:23 CDT 2024	MPXV; 2; B_isolate MPXV/Germany/2022/RKI284	197140	OP270473	MPXV_OP270473	Virus_dsDNA_env; Poxviridae; Chordopoxvirinae; Orthopoxvirus; MPXV; 2; B	Monkeypox virus	Linear	OP270473 DEU 2022	West Af	3	2	Europe	DEU	Germany	B	Human	MPXV/Germany/2022/RKI284	2022	Homo sapiens	OP270473
OP270474	Wed Jun 26 18:51:23 CDT 2024	MPXV; 2; B_isolate MPXV/Germany/2022/RKI285	197140	OP270474	MPXV_OP270474	Virus_dsDNA_env; Poxviridae; Chordopoxvirinae; Orthopoxvirus; MPXV; 2; B	Monkeypox virus	Linear	OP270474 DEU 2022	West Af	3	2	Europe	DEU	Germany	B	Human	MPXV/Germany/2022/RKI285	2022	Homo sapiens	OP270474
OP270475	Wed Jun 26 18:51:23 CDT 2024	MPXV; 2; B_isolate MPXV/Germany/2022/RKI286	197139	OP270475	MPXV_OP270475	Virus_dsDNA_env; Poxviridae; Chordopoxvirinae; Orthopoxvirus; MPXV; 2; B	Monkeypox virus	Linear	OP270475 DEU 2022	West Af	3	2	Europe	DEU	Germany	B	Human	MPXV/Germany/2022/RKI286	2022	Homo sapiens	OP270475
OP270476	Wed Jun 26 18:51:23 CDT 2024	MPXV; 2; B_isolate MPXV/Germany/2022/RKI287	197139	OP270476	MPXV_OP270476	Virus_dsDNA_env; Poxviridae; Chordopoxvirinae; Orthopoxvirus; MPXV; 2; B	Monkeypox virus	Linear	OP270476 DEU 2022	West Af	3	2	Europe	DEU	Germany	B	Human	MPXV/Germany/2022/RKI287	2022	Homo sapiens	OP270476
OP279043	Wed Jun 26 18:51:23 CDT 2024	MPXV; 2; B_isolate MPXV/CAN/UN-NML-4140/2022	197176	OP279043	MPXV_OP279043	Virus_dsDNA_env; Poxviridae; Chordopoxvirinae; Orthopoxvirus; MPXV; 2; B	Monkeypox virus	Linear	OP279043 CAN 2022	West Af	3	2	N America	CAN	Canada	B	Human	MPXV/CAN/UN-NML-4140/2022	2022	Homo sapiens	OP279043
OP279045	Wed Jun 26 18:51:23 CDT 2024	MPXV; 2; B_isolate MPXV/CAN/UN-NML-4144/2022	197177	OP279045	MPXV_OP279045	Virus_dsDNA_env; Poxviridae; Chordopoxvirinae; Orthopoxvirus; MPXV; 2; B	Monkeypox virus	Linear	OP279045 CAN 2022	West Af	3	2	N America	CAN	Canada	B	Human	MPXV/CAN/UN-NML-4144/2022	2022	Homo sapiens	OP279045
OP279046	Wed Jun 26 18:51:23 CDT 2024	MPXV; 2; B_isolate MPXV/CAN/UN-NML-4150/2022	197180	OP279046	MPXV_OP279046	Virus_dsDNA_env; Poxviridae; Chordopoxvirinae; Orthopoxvirus; MPXV; 2; B	Monkeypox virus	Linear	OP279046 CAN 2022	West Af	3	2	N America	CAN	Canada	B	Human	MPXV/CAN/UN-NML-4150/2022	2022	Homo sapiens	OP279046
OP289782	Wed Jun 26 18:51:23 CDT 2024	MPXV; 2; B_isolate LIM-INS-001	197200	OP289782	MPXV_OP289782	Virus_dsDNA_env; Poxviridae; Chordopoxvirinae; Orthopoxvirus; MPXV; 2; B	Monkeypox virus	Linear	OP289782 PER 2022	West Af	3	2	S America	PER	Peru	B	Human	LIM-INS-001	2022	Homo sapiens	OP289782
OP289783	Wed Jun 26 18:51:23 CDT 2024	MPXV; 2; B_isolate LIM-INS-003	197193	OP289783	MPXV_OP289783	Virus_dsDNA_env; Poxviridae; Chordopoxvirinae; Orthopoxvirus; MPXV; 2; B	Monkeypox virus	Linear	OP289783 PER 2022	West Af	3	2	S America	PER	Peru	B	Human	LIM-INS-003	2022	Homo sapiens	OP289783
OP303778	Wed Jun 26 18:51:23 CDT 2024	MPXV; 2; B_isolate MPXV_USA_2022_FL0015	197172	OP303778	MPXV_OP303778	Virus_dsDNA_env; Poxviridae; Chordopoxvirinae; Orthopoxvirus; MPXV; 2; B	Monkeypox virus	Linear	OP303778 USA 2022	West Af	3	2	N America	USA	USA: FL	B	Human	MPXV_USA_2022_FL0015	2022	Homo sapiens	OP303778
OP303779	Wed Jun 26 18:51:23 CDT 2024	MPXV; 2; B_isolate MPXV_USA_2022_FL0016	197161	OP303779	MPXV_OP303779	Virus_dsDNA_env; Poxviridae; Chordopoxvirinae; Orthopoxvirus; MPXV; 2; B	Monkeypox virus	Linear	OP303779 USA 2022	West Af	3	2	N America	USA	USA: FL	B	Human	MPXV_USA_2022_FL0016	2022	Homo sapiens	OP303779
OP303780	Wed Jun 26 18:51:23 CDT 2024	MPXV; 2; B_isolate MPXV_USA_2022_FL0017	197133	OP303780	MPXV_OP303780	Virus_dsDNA_env; Poxviridae; Chordopoxvirinae; Orthopoxvirus; MPXV; 2; B	Monkeypox virus	Linear	OP303780 USA 2022	West Af	3	2	N America	USA	USA: FL	B	Human	MPXV_USA_2022_FL0017	2022	Homo sapiens	OP303780
OP303781	Wed Jun 26 18:51:23 CDT 2024	MPXV; 2; B_isolate MPXV_USA_2022_FL0018	197127	OP303781	MPXV_OP303781	Virus_dsDNA_env; Poxviridae; Chordopoxvirinae; Orthopoxvirus; MPXV; 2; B	Monkeypox virus	Linear	OP303781 USA 2022	West Af	3	2	N America	USA	USA: FL	B	Human	MPXV_USA_2022_FL0018	2022	Homo sapiens	OP303781
OP303782	Wed Jun 26 18:51:23 CDT 2024	MPXV; 2; B_isolate MPXV_USA_2022_IL0027	197153	OP303782	MPXV_OP303782	Virus_dsDNA_env; Poxviridae; Chordopoxvirinae; Orthopoxvirus; MPXV; 2; B	Monkeypox virus	Linear	OP303782 USA 2022	West Af	3	2	N America	USA	USA: IL	B	Human	MPXV_USA_2022_IL0027	2022	Homo sapiens	OP303782
OP303783	Wed Jun 26 18:51:23 CDT 2024	MPXV; 2; B_isolate MPXV_USA_2022_IL0028	197150	OP303783	MPXV_OP303783	Virus_dsDNA_env; Poxviridae; Chordopoxvirinae; Orthopoxvirus; MPXV; 2; B	Monkeypox virus	Linear	OP303783 USA 2022	West Af	3	2	N America	USA	USA: IL	B	Human	MPXV_USA_2022_IL0028	2022	Homo sapiens	OP303783
OP303784	Wed Jun 26 18:51:23 CDT 2024	MPXV; 2; B_isolate MPXV_USA_2022_IL0034	197138	OP303784	MPXV_OP303784	Virus_dsDNA_env; Poxviridae; Chordopoxvirinae; Orthopoxvirus; MPXV; 2; B	Monkeypox virus	Linear	OP303784 USA 2022	West Af	3	2	N America	USA	USA: IL	B	Human	MPXV_USA_2022_IL0034	2022	Homo sapiens	OP303784
OP303785	Wed Jun 26 18:51:23 CDT 2024	MPXV; 2; B_isolate MPXV_USA_2022_IL0042	197122	OP303785	MPXV_OP303785	Virus_dsDNA_env; Poxviridae; Chordopoxvirinae; Orthopoxvirus; MPXV; 2; B	Monkeypox virus	Linear	OP303785 USA 2022	West Af	3	2	N America	USA	USA: IL	B	Human	MPXV_USA_2022_IL0042	2022	Homo sapiens	OP303785
OP303786	Wed Jun 26 18:51:23 CDT 2024	MPXV; 2; B_isolate MPXV_USA_2022_IL0040	197144	OP303786	MPXV_OP303786	Virus_dsDNA_env; Poxviridae; Chordopoxvirinae; Orthopoxvirus; MPXV; 2; B	Monkeypox virus	Linear	OP303786 USA 2022	West Af	3	2	N America	USA	USA: IL	B	Human	MPXV_USA_2022_IL0040	2022	Homo sapiens	OP303786
OP303787	Wed Jun 26 18:51:23 CDT 2024	MPXV; 2; B_isolate MPXV_USA_2022_TX0007	197123	OP303787	MPXV_OP303787	Virus_dsDNA_env; Poxviridae; Chordopoxvirinae; Orthopoxvirus; MPXV; 2; B	Monkeypox virus	Linear	OP303787 USA 2022	West Af	3	2	N America	USA	USA: TX	B	Human	MPXV_USA_2022_TX0007	2022	Homo sapiens	OP303787
OP303788	Wed Jun 26 18:51:23 CDT 2024	MPXV; 2; B_isolate MPXV_USA_2022_KY0001	197125	OP303788	MPXV_OP303788	Virus_dsDNA_env; Poxviridae; Chordopoxvirinae; Orthopoxvirus; MPXV; 2; B	Monkeypox virus	Linear	OP303788 USA 2022	West Af	3	2	N America	USA	USA: KY	B	Human	MPXV_USA_2022_KY0001	2022	Homo sapiens	OP303788
OP303789	Wed Jun 26 18:51:23 CDT 2024	MPXV; 2; B_isolate MPXV_USA_2022_NY0014	197154	OP303789	MPXV_OP303789	Virus_dsDNA_env; Poxviridae; Chordopoxvirinae; Orthopoxvirus; MPXV; 2; B	Monkeypox virus	Linear	OP303789 USA 2022	West Af	3	2	N America	USA	USA: NY	B	Human	MPXV_USA_2022_NY0014	2022	Homo sapiens	OP303789
OP303790	Wed Jun 26 18:51:23 CDT 2024	MPXV; 2; B_isolate MPXV_USA_2022_IL0044	197147	OP303790	MPXV_OP303790	Virus_dsDNA_env; Poxviridae; Chordopoxvirinae; Orthopoxvirus; MPXV; 2; B	Monkeypox virus	Linear	OP303790 USA 2022	West Af	3	2	N America	USA	USA: IL	B	Human	MPXV_USA_2022_IL0044	2022	Homo sapiens	OP303790
OP303791	Wed Jun 26 18:51:23 CDT 2024	MPXV; 2; B_isolate MPXV_USA_2022_NE0001	197172	OP303791	MPXV_OP303791	Virus_dsDNA_env; Poxviridae; Chordopoxvirinae; Orthopoxvirus; MPXV; 2; B	Monkeypox virus	Linear	OP303791 USA 2022	West Af	3	2	N America	USA	USA: NE	B	Human	MPXV_USA_2022_NE0001	2022	Homo sapiens	OP303791
OP303792	Wed Jun 26 18:51:23 CDT 2024	MPXV; 2; B_isolate MPXV_USA_2022_NE0002	197120	OP303792	MPXV_OP303792	Virus_dsDNA_env; Poxviridae; Chordopoxvirinae; Orthopoxvirus; MPXV; 2; B	Monkeypox virus	Linear	OP303792 USA 2022	West Af	3	2	N America	USA	USA: NE	B	Human	MPXV_USA_2022_NE0002	2022	Homo sapiens	OP303792
OP303793	Wed Jun 26 18:51:23 CDT 2024	MPXV; 2; B_isolate MPXV_USA_2022_NY0020	197131	OP303793	MPXV_OP303793	Virus_dsDNA_env; Poxviridae; Chordopoxvirinae; Orthopoxvirus; MPXV; 2; B	Monkeypox virus	Linear	OP303793 USA 2022	West Af	3	2	N America	USA	USA: NY	B	Human	MPXV_USA_2022_NY0020	2022	Homo sapiens	OP303793
OP303794	Wed Jun 26 18:51:23 CDT 2024	MPXV; 2; B_isolate MPXV_USA_2022_NY0023	197129	OP303794	MPXV_OP303794	Virus_dsDNA_env; Poxviridae; Chordopoxvirinae; Orthopoxvirus; MPXV; 2; B	Monkeypox virus	Linear	OP303794 USA 2022	West Af	3	2	N America	USA	USA: NY	B	Human	MPXV_USA_2022_NY0023	2022	Homo sapiens	OP303794
OP303795	Wed Jun 26 18:51:23 CDT 2024	MPXV; 2; B_isolate MPXV_USA_2022_OH0002	197148	OP303795	MPXV_OP303795	Virus_dsDNA_env; Poxviridae; Chordopoxvirinae; Orthopoxvirus; MPXV; 2; B	Monkeypox virus	Linear	OP303795 USA 2022	West Af	3	2	N America	USA	USA: OH	B	Human	MPXV_USA_2022_OH0002	2022	Homo sapiens	OP303795
OP303796	Wed Jun 26 18:51:23 CDT 2024	MPXV; 2; B_isolate MPXV_USA_2022_NY0015	197139	OP303796	MPXV_OP303796	Virus_dsDNA_env; Poxviridae; Chordopoxvirinae; Orthopoxvirus; MPXV; 2; B	Monkeypox virus	Linear	OP303796 USA 2022	West Af	3	2	N America	USA	USA: NY	B	Human	MPXV_USA_2022_NY0015	2022	Homo sapiens	OP303796
OP303797	Wed Jun 26 18:51:23 CDT 2024	MPXV; 2; B_isolate MPXV_USA_2022_VA0003	197151	OP303797	MPXV_OP303797	Virus_dsDNA_env; Poxviridae; Chordopoxvirinae; Orthopoxvirus; MPXV; 2; B	Monkeypox virus	Linear	OP303797 USA 2022	West Af	3	2	N America	USA	USA: VA	B	Human	MPXV_USA_2022_VA0003	2022	Homo sapiens	OP303797
OP310039	Wed Jun 26 18:51:23 CDT 2024	MPXV; 2; B_isolate MPXV/USA/WA-UW-080617/2022	197176	OP310039	MPXV_OP310039	Virus_dsDNA_env; Poxviridae; Chordopoxvirinae; Orthopoxvirus; MPXV; 2; B	Monkeypox virus	Linear	OP310039 USA 2022	West Af	3	2	N America	USA	USA: WA	B	Human	MPXV/USA/WA-UW-080617/2022	2022	Homo sapiens	OP310039
OP310040	Wed Jun 26 18:51:23 CDT 2024	MPXV; 2; B_isolate MPXV/USA/WA-UW-088656/2022	197176	OP310040	MPXV_OP310040	Virus_dsDNA_env; Poxviridae; Chordopoxvirinae; Orthopoxvirus; MPXV; 2; B	Monkeypox virus	Linear	OP310040 USA 2022	West Af	3	2	N America	USA	USA: WA	B	Human	MPXV/USA/WA-UW-088656/2022	2022	Homo sapiens	OP310040
OP310041	Wed Jun 26 18:51:23 CDT 2024	MPXV; 2; B_isolate MPXV/USA/WA-UW-080185/2022	197178	OP310041	MPXV_OP310041	Virus_dsDNA_env; Poxviridae; Chordopoxvirinae; Orthopoxvirus; MPXV; 2; B	Monkeypox virus	Linear	OP310041 USA 2022	West Af	3	2	N America	USA	USA: WA	B	Human	MPXV/USA/WA-UW-080185/2022	2022	Homo sapiens	OP310041
OP310042	Wed Jun 26 18:51:23 CDT 2024	MPXV; 2; B_isolate MPXV/USA/WA-UW-089266/2022	197180	OP310042	MPXV_OP310042	Virus_dsDNA_env; Poxviridae; Chordopoxvirinae; Orthopoxvirus; MPXV; 2; B	Monkeypox virus	Linear	OP310042 USA 2022	West Af	3	2	N America	USA	USA: WA	B	Human	MPXV/USA/WA-UW-089266/2022	2022	Homo sapiens	OP310042
OP310043	Wed Jun 26 18:51:23 CDT 2024	MPXV; 2; B_isolate MPXV/USA/WA-UW-086841/2022	197177	OP310043	MPXV_OP310043	Virus_dsDNA_env; Poxviridae; Chordopoxvirinae; Orthopoxvirus; MPXV; 2; B	Monkeypox virus	Linear	OP310043 USA 2022	West Af	3	2	N America	USA	USA: WA	B	Human	MPXV/USA/WA-UW-086841/2022	2022	Homo sapiens	OP310043
OP310044	Wed Jun 26 18:51:23 CDT 2024	MPXV; 2; B_isolate MPXV/USA/WA-UW-083888/2022	197176	OP310044	MPXV_OP310044	Virus_dsDNA_env; Poxviridae; Chordopoxvirinae; Orthopoxvirus; MPXV; 2; B	Monkeypox virus	Linear	OP310044 USA 2022	West Af	3	2	N America	USA	USA: WA	B	Human	MPXV/USA/WA-UW-083888/2022	2022	Homo sapiens	OP310044
OP310046	Wed Jun 26 18:51:23 CDT 2024	MPXV; 2; B_isolate MPXV/USA/WA-UW-083914/2022	197177	OP310046	MPXV_OP310046	Virus_dsDNA_env; Poxviridae; Chordopoxvirinae; Orthopoxvirus; MPXV; 2; B	Monkeypox virus	Linear	OP310046 USA 2022	West Af	3	2	N America	USA	USA: WA	B	Human	MPXV/USA/WA-UW-083914/2022	2022	Homo sapiens	OP310046
OP310047	Wed Jun 26 18:51:23 CDT 2024	MPXV; 2; B_isolate MPXV/USA/WA-UW-087301/2022	197176	OP310047	MPXV_OP310047	Virus_dsDNA_env; Poxviridae; Chordopoxvirinae; Orthopoxvirus; MPXV; 2; B	Monkeypox virus	Linear	OP310047 USA 2022	West Af	3	2	N America	USA	USA: WA	B	Human	MPXV/USA/WA-UW-087301/2022	2022	Homo sapiens	OP310047
OP310048	Wed Jun 26 18:51:23 CDT 2024	MPXV; 2; B_isolate MPXV/USA/WA-UW-088871/2022	197176	OP310048	MPXV_OP310048	Virus_dsDNA_env; Poxviridae; Chordopoxvirinae; Orthopoxvirus; MPXV; 2; B	Monkeypox virus	Linear	OP310048 USA 2022	West Af	3	2	N America	USA	USA: WA	B	Human	MPXV/USA/WA-UW-088871/2022	2022	Homo sapiens	OP310048
OP310049	Wed Jun 26 18:51:23 CDT 2024	MPXV; 2; B_isolate MPXV/USA/OH-UW-085556/2022	197176	OP310049	MPXV_OP310049	Virus_dsDNA_env; Poxviridae; Chordopoxvirinae; Orthopoxvirus; MPXV; 2; B	Monkeypox virus	Linear	OP310049 USA 2022	West Af	3	2	N America	USA	USA: OH	B	Human	MPXV/USA/OH-UW-085556/2022	2022	Homo sapiens	OP310049
OP310050	Wed Jun 26 18:51:23 CDT 2024	MPXV; 2; B_isolate MPXV/USA/OH-UW-085701/2022	197176	OP310050	MPXV_OP310050	Virus_dsDNA_env; Poxviridae; Chordopoxvirinae; Orthopoxvirus; MPXV; 2; B	Monkeypox virus	Linear	OP310050 USA 2022	West Af	3	2	N America	USA	USA: OH	B	Human	MPXV/USA/OH-UW-085701/2022	2022	Homo sapiens	OP310050
OP310051	Wed Jun 26 18:51:23 CDT 2024	MPXV; 2; B_isolate MPXV/USA/WA-UW-082029/2022	197176	OP310051	MPXV_OP310051	Virus_dsDNA_env; Poxviridae; Chordopoxvirinae; Orthopoxvirus; MPXV; 2; B	Monkeypox virus	Linear	OP310051 USA 2022	West Af	3	2	N America	USA	USA: WA	B	Human	MPXV/USA/WA-UW-082029/2022	2022	Homo sapiens	OP310051
OP310052	Wed Jun 26 18:51:23 CDT 2024	MPXV; 2; B_isolate MPXV/USA/WA-UW-081935/2022	197178	OP310052	MPXV_OP310052	Virus_dsDNA_env; Poxviridae; Chordopoxvirinae; Orthopoxvirus; MPXV; 2; B	Monkeypox virus	Linear	OP310052 USA 2022	West Af	3	2	N America	USA	USA: WA	B	Human	MPXV/USA/WA-UW-081935/2022	2022	Homo sapiens	OP310052
OP310053	Wed Jun 26 18:51:23 CDT 2024	MPXV; 2; B_isolate MPXV/USA/WA-UW-082670/2022	197176	OP310053	MPXV_OP310053	Virus_dsDNA_env; Poxviridae; Chordopoxvirinae; Orthopoxvirus; MPXV; 2; B	Monkeypox virus	Linear	OP310053 USA 2022	West Af	3	2	N America	USA	USA: WA	B	Human	MPXV/USA/WA-UW-082670/2022	2022	Homo sapiens	OP310053
OP310054	Wed Jun 26 18:51:23 CDT 2024	MPXV; 2; B_isolate MPXV/USA/WA-UW-088213/2022	197178	OP310054	MPXV_OP310054	Virus_dsDNA_env; Poxviridae; Chordopoxvirinae; Orthopoxvirus; MPXV; 2; B	Monkeypox virus	Linear	OP310054 USA 2022	West Af	3	2	N America	USA	USA: WA	B	Human	MPXV/USA/WA-UW-088213/2022	2022	Homo sapiens	OP310054
OP310055	Wed Jun 26 18:51:23 CDT 2024	MPXV; 2; B_isolate MPXV/USA/WA-UW-086360/2022	197174	OP310055	MPXV_OP310055	Virus_dsDNA_env; Poxviridae; Chordopoxvirinae; Orthopoxvirus; MPXV; 2; B	Monkeypox virus	Linear	OP310055 USA 2022	West Af	3	2	N America	USA	USA: WA	B	Human	MPXV/USA/WA-UW-086360/2022	2022	Homo sapiens	OP310055
OP310056	Wed Jun 26 18:51:23 CDT 2024	MPXV; 2; B_isolate MPXV/USA/WA-UW-089437/2022	197176	OP310056	MPXV_OP310056	Virus_dsDNA_env; Poxviridae; Chordopoxvirinae; Orthopoxvirus; MPXV; 2; B	Monkeypox virus	Linear	OP310056 USA 2022	West Af	3	2	N America	USA	USA: WA	B	Human	MPXV/USA/WA-UW-089437/2022	2022	Homo sapiens	OP310056
OP310057	Wed Jun 26 18:51:23 CDT 2024	MPXV; 2; B_isolate MPXV/USA/WA-UW-089714/2022	197176	OP310057	MPXV_OP310057	Virus_dsDNA_env; Poxviridae; Chordopoxvirinae; Orthopoxvirus; MPXV; 2; B	Monkeypox virus	Linear	OP310057 USA 2022	West Af	3	2	N America	USA	USA: WA	B	Human	MPXV/USA/WA-UW-089714/2022	2022	Homo sapiens	OP310057
OP310058	Wed Jun 26 18:51:23 CDT 2024	MPXV; 2; B_isolate MPXV/USA/WA-UW-087349/2022	197178	OP310058	MPXV_OP310058	Virus_dsDNA_env; Poxviridae; Chordopoxvirinae; Orthopoxvirus; MPXV; 2; B	Monkeypox virus	Linear	OP310058 USA 2022	West Af	3	2	N America	USA	USA: WA	B	Human	MPXV/USA/WA-UW-087349/2022	2022	Homo sapiens	OP310058
OP310059	Wed Jun 26 18:51:23 CDT 2024	MPXV; 2; B_isolate MPXV/USA/OH-UW-089521/2022	197174	OP310059	MPXV_OP310059	Virus_dsDNA_env; Poxviridae; Chordopoxvirinae; Orthopoxvirus; MPXV; 2; B	Monkeypox virus	Linear	OP310059 USA 2022	West Af	3	2	N America	USA	USA: OH	B	Human	MPXV/USA/OH-UW-089521/2022	2022	Homo sapiens	OP310059
OP310060	Wed Jun 26 18:51:23 CDT 2024	MPXV; 2; B_isolate MPXV/USA/OH-UW-082225/2022	197176	OP310060	MPXV_OP310060	Virus_dsDNA_env; Poxviridae; Chordopoxvirinae; Orthopoxvirus; MPXV; 2; B	Monkeypox virus	Linear	OP310060 USA 2022	West Af	3	2	N America	USA	USA: OH	B	Human	MPXV/USA/OH-UW-082225/2022	2022	Homo sapiens	OP310060
OP310061	Wed Jun 26 18:51:23 CDT 2024	MPXV; 2; B_isolate MPXV/USA/WA-UW-088764/2022	197178	OP310061	MPXV_OP310061	Virus_dsDNA_env; Poxviridae; Chordopoxvirinae; Orthopoxvirus; MPXV; 2; B	Monkeypox virus	Linear	OP310061 USA 2022	West Af	3	2	N America	USA	USA: WA	B	Human	MPXV/USA/WA-UW-088764/2022	2022	Homo sapiens	OP310061
OP310062	Wed Jun 26 18:51:23 CDT 2024	MPXV; 2; B_isolate MPXV/USA/WA-UW-089836/2022	197176	OP310062	MPXV_OP310062	Virus_dsDNA_env; Poxviridae; Chordopoxvirinae; Orthopoxvirus; MPXV; 2; B	Monkeypox virus	Linear	OP310062 USA 2022	West Af	3	2	N America	USA	USA: WA	B	Human	MPXV/USA/WA-UW-089836/2022	2022	Homo sapiens	OP310062
OP310063	Wed Jun 26 18:51:23 CDT 2024	MPXV; 2; B_isolate MPXV/USA/WA-UW-082810/2022	197178	OP310063	MPXV_OP310063	Virus_dsDNA_env; Poxviridae; Chordopoxvirinae; Orthopoxvirus; MPXV; 2; B	Monkeypox virus	Linear	OP310063 USA 2022	West Af	3	2	N America	USA	USA: WA	B	Human	MPXV/USA/WA-UW-082810/2022	2022	Homo sapiens	OP310063
OP310064	Wed Jun 26 18:51:23 CDT 2024	MPXV; 2; B_isolate MPXV/USA/WA-UW-082497/2022	197176	OP310064	MPXV_OP310064	Virus_dsDNA_env; Poxviridae; Chordopoxvirinae; Orthopoxvirus; MPXV; 2; B	Monkeypox virus	Linear	OP310064 USA 2022	West Af	3	2	N America	USA	USA: WA	B	Human	MPXV/USA/WA-UW-082497/2022	2022	Homo sapiens	OP310064
OP310065	Wed Jun 26 18:51:23 CDT 2024	MPXV; 2; B_isolate MPXV/USA/WA-UW-088973/2022	197178	OP310065	MPXV_OP310065	Virus_dsDNA_env; Poxviridae; Chordopoxvirinae; Orthopoxvirus; MPXV; 2; B	Monkeypox virus	Linear	OP310065 USA 2022	West Af	3	2	N America	USA	USA: WA	B	Human	MPXV/USA/WA-UW-088973/2022	2022	Homo sapiens	OP310065
OP310066	Wed Jun 26 18:51:23 CDT 2024	MPXV; 2; B_isolate MPXV/USA/WA-UW-089152/2022	197176	OP310066	MPXV_OP310066	Virus_dsDNA_env; Poxviridae; Chordopoxvirinae; Orthopoxvirus; MPXV; 2; B	Monkeypox virus	Linear	OP310066 USA 2022	West Af	3	2	N America	USA	USA: WA	B	Human	MPXV/USA/WA-UW-089152/2022	2022	Homo sapiens	OP310066
OP310068	Wed Jun 26 18:51:23 CDT 2024	MPXV; 2; B_isolate MPXV/USA/WA-UW-088225/2022	197176	OP310068	MPXV_OP310068	Virus_dsDNA_env; Poxviridae; Chordopoxvirinae; Orthopoxvirus; MPXV; 2; B	Monkeypox virus	Linear	OP310068 USA 2022	West Af	3	2	N America	USA	USA: WA	B	Human	MPXV/USA/WA-UW-088225/2022	2022	Homo sapiens	OP310068
OP310069	Wed Jun 26 18:51:23 CDT 2024	MPXV; 2; B_isolate MPXV/USA/WA-UW-088152/2022	197176	OP310069	MPXV_OP310069	Virus_dsDNA_env; Poxviridae; Chordopoxvirinae; Orthopoxvirus; MPXV; 2; B	Monkeypox virus	Linear	OP310069 USA 2022	West Af	3	2	N America	USA	USA: WA	B	Human	MPXV/USA/WA-UW-088152/2022	2022	Homo sapiens	OP310069
OP314957	Wed Jun 26 18:51:23 CDT 2024	MPXV; 2; B_isolate MPXV22/USA-NE-83	197199	OP314957	MPXV_OP314957	Virus_dsDNA_env; Poxviridae; Chordopoxvirinae; Orthopoxvirus; MPXV; 2; B	Monkeypox virus	Linear	OP314957 USA 2022	West Af	3	2	N America	USA	USA: NE	B	Human	MPXV22/USA-NE-83	2022	Homo sapiens	OP314957
OP314958	Wed Jun 26 18:51:23 CDT 2024	MPXV; 2; B_isolate MPXV22/USA-NE-99	197182	OP314958	MPXV_OP314958	Virus_dsDNA_env; Poxviridae; Chordopoxvirinae; Orthopoxvirus; MPXV; 2; B	Monkeypox virus	Linear	OP314958 USA 2022	West Af	3	2	N America	USA	USA: NE	B	Human	MPXV22/USA-NE-99	2022	Homo sapiens	OP314958
OP314959	Wed Jun 26 18:51:23 CDT 2024	MPXV; 2; B_isolate MPXV22/USA-NE-111	197199	OP314959	MPXV_OP314959	Virus_dsDNA_env; Poxviridae; Chordopoxvirinae; Orthopoxvirus; MPXV; 2; B	Monkeypox virus	Linear	OP314959 USA 2022	West Af	3	2	N America	USA	USA: NE	B	Human	MPXV22/USA-NE-111	2022	Homo sapiens	OP314959
OP314960	Wed Jun 26 18:51:23 CDT 2024	MPXV; 2; B_isolate MPXV22/USA-NE-115	197182	OP314960	MPXV_OP314960	Virus_dsDNA_env; Poxviridae; Chordopoxvirinae; Orthopoxvirus; MPXV; 2; B	Monkeypox virus	Linear	OP314960 USA 2022	West Af	3	2	N America	USA	USA: NE	B	Human	MPXV22/USA-NE-115	2022	Homo sapiens	OP314960
OP314961	Wed Jun 26 18:51:23 CDT 2024	MPXV; 2; B_isolate MPXV22/USA-NE-152	197182	OP314961	MPXV_OP314961	Virus_dsDNA_env; Poxviridae; Chordopoxvirinae; Orthopoxvirus; MPXV; 2; B	Monkeypox virus	Linear	OP314961 USA 2022	West Af	3	2	N America	USA	USA: NE	B	Human	MPXV22/USA-NE-152	2022	Homo sapiens	OP314961
OP320548	Wed Jun 26 18:51:23 CDT 2024	MPXV; 2; B_isolate LIM-INS008	197194	OP320548	MPXV_OP320548	Virus_dsDNA_env; Poxviridae; Chordopoxvirinae; Orthopoxvirus; MPXV; 2; B	Monkeypox virus	Linear	OP320548 PER 2022	West Af	3	2	S America	PER	Peru	B	Human	LIM-INS008	2022	Homo sapiens	OP320548
OP320549	Wed Jun 26 18:51:23 CDT 2024	MPXV; 2; B_isolate LIM-INS-010	197194	OP320549	MPXV_OP320549	Virus_dsDNA_env; Poxviridae; Chordopoxvirinae; Orthopoxvirus; MPXV; 2; B	Monkeypox virus	Linear	OP320549 PER 2022	West Af	3	2	S America	PER	Peru	B	Human	LIM-INS-010	2022	Homo sapiens	OP320549
OP320550	Wed Jun 26 18:51:23 CDT 2024	MPXV; 2; B_isolate LIM-INS-015	197193	OP320550	MPXV_OP320550	Virus_dsDNA_env; Poxviridae; Chordopoxvirinae; Orthopoxvirus; MPXV; 2; B	Monkeypox virus	Linear	OP320550 PER 2022	West Af	3	2	S America	PER	Peru	B	Human	LIM-INS-015	2022	Homo sapiens	OP320550
OP320551	Wed Jun 26 18:51:23 CDT 2024	MPXV; 2; B_isolate LIM-INS-018	197193	OP320551	MPXV_OP320551	Virus_dsDNA_env; Poxviridae; Chordopoxvirinae; Orthopoxvirus; MPXV; 2; B	Monkeypox virus	Linear	OP320551 PER 2022	West Af	3	2	S America	PER	Peru	B	Human	LIM-INS-018	2022	Homo sapiens	OP320551
OP320552	Wed Jun 26 18:51:23 CDT 2024	MPXV; 2; B_isolate LIM-INS-012	197193	OP320552	MPXV_OP320552	Virus_dsDNA_env; Poxviridae; Chordopoxvirinae; Orthopoxvirus; MPXV; 2; B	Monkeypox virus	Linear	OP320552 PER 2022	West Af	3	2	S America	PER	Peru	B	Human	LIM-INS-012	2022	Homo sapiens	OP320552
OP320553	Wed Jun 26 18:51:23 CDT 2024	MPXV; 2; B_isolate LIM-INS-013	197194	OP320553	MPXV_OP320553	Virus_dsDNA_env; Poxviridae; Chordopoxvirinae; Orthopoxvirus; MPXV; 2; B	Monkeypox virus	Linear	OP320553 PER 2022	West Af	3	2	S America	PER	Peru	B	Human	LIM-INS-013	2022	Homo sapiens	OP320553
OP320554	Wed Jun 26 18:51:23 CDT 2024	MPXV; 2; B_isolate LIM-INS-016	197193	OP320554	MPXV_OP320554	Virus_dsDNA_env; Poxviridae; Chordopoxvirinae; Orthopoxvirus; MPXV; 2; B	Monkeypox virus	Linear	OP320554 PER 2022	West Af	3	2	S America	PER	Peru	B	Human	LIM-INS-016	2022	Homo sapiens	OP320554
OP320555	Wed Jun 26 18:51:23 CDT 2024	MPXV; 2; B_isolate LIM-INS-021	197193	OP320555	MPXV_OP320555	Virus_dsDNA_env; Poxviridae; Chordopoxvirinae; Orthopoxvirus; MPXV; 2; B	Monkeypox virus	Linear	OP320555 PER 2022	West Af	3	2	S America	PER	Peru	B	Human	LIM-INS-021	2022	Homo sapiens	OP320555
OP326284	Wed Jun 26 18:51:23 CDT 2024	MPXV; 2; B_isolate MPXV/Germany/BE-ChVir28607/2022	197341	OP326284	MPXV_OP326284	Virus_dsDNA_env; Poxviridae; Chordopoxvirinae; Orthopoxvirus; MPXV; 2; B	Monkeypox virus	Linear	OP326284 DEU 2022	West Af	3	2	Europe	DEU	Germany	B	Human	MPXV/Germany/BE-ChVir28607/2022	2022	Homo sapiens	OP326284
OP328307	Wed Jun 26 18:51:23 CDT 2024	MPXV; 2; B_isolate MPXV/USA/WA-UW-083953/2022	197196	OP328307	MPXV_OP328307	Virus_dsDNA_env; Poxviridae; Chordopoxvirinae; Orthopoxvirus; MPXV; 2; B	Monkeypox virus	Linear	OP328307 USA 2022	West Af	3	2	N America	USA	USA: WA	B	Human	MPXV/USA/WA-UW-083953/2022	2022	Homo sapiens	OP328307
OP328308	Wed Jun 26 18:51:23 CDT 2024	MPXV; 2; B_isolate MPXV/USA/WA-UW-083083/2022	197204	OP328308	MPXV_OP328308	Virus_dsDNA_env; Poxviridae; Chordopoxvirinae; Orthopoxvirus; MPXV; 2; B	Monkeypox virus	Linear	OP328308 USA 2022	West Af	3	2	N America	USA	USA: WA	B	Human	MPXV/USA/WA-UW-083083/2022	2022	Homo sapiens	OP328308
OP328309	Wed Jun 26 18:51:23 CDT 2024	MPXV; 2; B_isolate MPXV/USA/WA-UW-089142/2022	197190	OP328309	MPXV_OP328309	Virus_dsDNA_env; Poxviridae; Chordopoxvirinae; Orthopoxvirus; MPXV; 2; B	Monkeypox virus	Linear	OP328309 USA 2022	West Af	3	2	N America	USA	USA: WA	B	Human	MPXV/USA/WA-UW-089142/2022	2022	Homo sapiens	OP328309
OP328310	Wed Jun 26 18:51:23 CDT 2024	MPXV; 2; B_isolate MPXV/USA/WA-UW-088725/2022	197192	OP328310	MPXV_OP328310	Virus_dsDNA_env; Poxviridae; Chordopoxvirinae; Orthopoxvirus; MPXV; 2; B	Monkeypox virus	Linear	OP328310 USA 2022	West Af	3	2	N America	USA	USA: WA	B	Human	MPXV/USA/WA-UW-088725/2022	2022	Homo sapiens	OP328310
OP328311	Wed Jun 26 18:51:23 CDT 2024	MPXV; 2; B_isolate MPXV/USA/WA-UW-088258/2022	197164	OP328311	MPXV_OP328311	Virus_dsDNA_env; Poxviridae; Chordopoxvirinae; Orthopoxvirus; MPXV; 2; B	Monkeypox virus	Linear	OP328311 USA 2022	West Af	3	2	N America	USA	USA: WA	B	Human	MPXV/USA/WA-UW-088258/2022	2022	Homo sapiens	OP328311
OP328312	Wed Jun 26 18:51:23 CDT 2024	MPXV; 2; B_isolate MPXV/USA/WA-UW-087564/2022	197194	OP328312	MPXV_OP328312	Virus_dsDNA_env; Poxviridae; Chordopoxvirinae; Orthopoxvirus; MPXV; 2; B	Monkeypox virus	Linear	OP328312 USA 2022	West Af	3	2	N America	USA	USA: WA	B	Human	MPXV/USA/WA-UW-087564/2022	2022	Homo sapiens	OP328312
OP331334	Wed Jun 26 18:51:23 CDT 2024	MPXV; 2; B_isolate MPXV_UK_2022_9000060	197205	OP331334	MPXV_OP331334	Virus_dsDNA_env; Poxviridae; Chordopoxvirinae; Orthopoxvirus; MPXV; 2; B	Monkeypox virus	Linear	OP331334 GBR 2022	West Af	3	2	Europe	GBR	United Kingdom	B	Human	MPXV_UK_2022_9000060	2022	Homo sapiens	OP331334
OP331335	Wed Jun 26 18:51:23 CDT 2024	MPXV; 2; B_isolate MPXV_UK_2022_9000155	197212	OP331335	MPXV_OP331335	Virus_dsDNA_env; Poxviridae; Chordopoxvirinae; Orthopoxvirus; MPXV; 2; B	Monkeypox virus	Linear	OP331335 GBR 2022	West Af	2	2	Europe	GBR	United Kingdom	B	Human	MPXV_UK_2022_9000155	2022	Homo sapiens	OP331335
OP331336	Wed Jun 26 18:51:23 CDT 2024	MPXV; 2; B_isolate MPXV_UK_2022_9000166	197196	OP331336	MPXV_OP331336	Virus_dsDNA_env; Poxviridae; Chordopoxvirinae; Orthopoxvirus; MPXV; 2; B	Monkeypox virus	Linear	OP331336 GBR 2022	West Af	2	2	Europe	GBR	United Kingdom	B	Human	MPXV_UK_2022_9000166	2022	Homo sapiens	OP331336
OP331337	Wed Jun 26 18:51:23 CDT 2024	MPXV; 2; B_isolate MPXV_UK_2022_9000183	197205	OP331337	MPXV_OP331337	Virus_dsDNA_env; Poxviridae; Chordopoxvirinae; Orthopoxvirus; MPXV; 2; B	Monkeypox virus	Linear	OP331337 GBR 2022	West Af	3	2	Europe	GBR	United Kingdom	B	Human	MPXV_UK_2022_9000183	2022	Homo sapiens	OP331337
OP331338	Wed Jun 26 18:51:23 CDT 2024	MPXV; 2; B_isolate MPXV_UK_2022_9000194	197189	OP331338	MPXV_OP331338	Virus_dsDNA_env; Poxviridae; Chordopoxvirinae; Orthopoxvirus; MPXV; 2; B	Monkeypox virus	Linear	OP331338 GBR 2022	West Af	3	2	Europe	GBR	United Kingdom	B	Human	MPXV_UK_2022_9000194	2022	Homo sapiens	OP331338
OP339846	Wed Jun 26 18:51:23 CDT 2024	MPXV; 2; B_isolate MPXV/Germany/2022/RKI289	197139	OP339846	MPXV_OP339846	Virus_dsDNA_env; Poxviridae; Chordopoxvirinae; Orthopoxvirus; MPXV; 2; B	Monkeypox virus	Linear	OP339846 DEU 2022	West Af	3	2	Europe	DEU	Germany	B	Human	MPXV/Germany/2022/RKI289	2022	Homo sapiens	OP339846
OP339847	Wed Jun 26 18:51:23 CDT 2024	MPXV; 2; B_isolate MPXV/Germany/2022/RKI290	197139	OP339847	MPXV_OP339847	Virus_dsDNA_env; Poxviridae; Chordopoxvirinae; Orthopoxvirus; MPXV; 2; B	Monkeypox virus	Linear	OP339847 DEU 2022	West Af	3	2	Europe	DEU	Germany	B	Human	MPXV/Germany/2022/RKI290	2022	Homo sapiens	OP339847
OP339848	Wed Jun 26 18:51:23 CDT 2024	MPXV; 2; B_isolate MPXV/Germany/2022/RKI291	197139	OP339848	MPXV_OP339848	Virus_dsDNA_env; Poxviridae; Chordopoxvirinae; Orthopoxvirus; MPXV; 2; B	Monkeypox virus	Linear	OP339848 DEU 2022	West Af	3	2	Europe	DEU	Germany	B	Human	MPXV/Germany/2022/RKI291	2022	Homo sapiens	OP339848
OP339849	Wed Jun 26 18:51:23 CDT 2024	MPXV; 2; B_isolate MPXV/Germany/2022/RKI292	197140	OP339849	MPXV_OP339849	Virus_dsDNA_env; Poxviridae; Chordopoxvirinae; Orthopoxvirus; MPXV; 2; B	Monkeypox virus	Linear	OP339849 DEU 2022	West Af	3	2	Europe	DEU	Germany	B	Human	MPXV/Germany/2022/RKI292	2022	Homo sapiens	OP339849
OP339850	Wed Jun 26 18:51:23 CDT 2024	MPXV; 2; B_isolate MPXV/Germany/2022/RKI293	197139	OP339850	MPXV_OP339850	Virus_dsDNA_env; Poxviridae; Chordopoxvirinae; Orthopoxvirus; MPXV; 2; B	Monkeypox virus	Linear	OP339850 DEU 2022	West Af	3	2	Europe	DEU	Germany	B	Human	MPXV/Germany/2022/RKI293	2022	Homo sapiens	OP339850
OP339851	Wed Jun 26 18:51:23 CDT 2024	MPXV; 2; B_isolate MPXV/Germany/2022/RKI294	197139	OP339851	MPXV_OP339851	Virus_dsDNA_env; Poxviridae; Chordopoxvirinae; Orthopoxvirus; MPXV; 2; B	Monkeypox virus	Linear	OP339851 DEU 2022	West Af	3	2	Europe	DEU	Germany	B	Human	MPXV/Germany/2022/RKI294	2022	Homo sapiens	OP339851
OP339852	Wed Jun 26 18:51:23 CDT 2024	MPXV; 2; B_isolate MPXV/Germany/2022/RKI295	197139	OP339852	MPXV_OP339852	Virus_dsDNA_env; Poxviridae; Chordopoxvirinae; Orthopoxvirus; MPXV; 2; B	Monkeypox virus	Linear	OP339852 DEU 2022	West Af	3	2	Europe	DEU	Germany	B	Human	MPXV/Germany/2022/RKI295	2022	Homo sapiens	OP339852
OP339853	Wed Jun 26 18:51:23 CDT 2024	MPXV; 2; B_isolate MPXV/Germany/2022/RKI296	197139	OP339853	MPXV_OP339853	Virus_dsDNA_env; Poxviridae; Chordopoxvirinae; Orthopoxvirus; MPXV; 2; B	Monkeypox virus	Linear	OP339853 DEU 2022	West Af	3	2	Europe	DEU	Germany	B	Human	MPXV/Germany/2022/RKI296	2022	Homo sapiens	OP339853
OP339854	Wed Jun 26 18:51:23 CDT 2024	MPXV; 2; B_isolate MPXV/Germany/2022/RKI297	197139	OP339854	MPXV_OP339854	Virus_dsDNA_env; Poxviridae; Chordopoxvirinae; Orthopoxvirus; MPXV; 2; B	Monkeypox virus	Linear	OP339854 DEU 2022	West Af	3	2	Europe	DEU	Germany	B	Human	MPXV/Germany/2022/RKI297	2022	Homo sapiens	OP339854
OP339855	Wed Jun 26 18:51:23 CDT 2024	MPXV; 2; B_isolate MPXV/Germany/2022/RKI298	197139	OP339855	MPXV_OP339855	Virus_dsDNA_env; Poxviridae; Chordopoxvirinae; Orthopoxvirus; MPXV; 2; B	Monkeypox virus	Linear	OP339855 DEU 2022	West Af	3	2	Europe	DEU	Germany	B	Human	MPXV/Germany/2022/RKI298	2022	Homo sapiens	OP339855
OP351278	Wed Jun 26 18:51:23 CDT 2024	MPXV; 2; B_isolate MPXV22/USA-OK-21	197182	OP351278	MPXV_OP351278	Virus_dsDNA_env; Poxviridae; Chordopoxvirinae; Orthopoxvirus; MPXV; 2; B	Monkeypox virus	Linear	OP351278 USA 2022	West Af	3	2	N America	USA	USA: OK	B	Human	MPXV22/USA-OK-21	2022	Homo sapiens	OP351278
OP351279	Wed Jun 26 18:51:23 CDT 2024	MPXV; 2; B_isolate MPXV22/USA-OK-41	197182	OP351279	MPXV_OP351279	Virus_dsDNA_env; Poxviridae; Chordopoxvirinae; Orthopoxvirus; MPXV; 2; B	Monkeypox virus	Linear	OP351279 USA 2022	West Af	3	2	N America	USA	USA: OK	B	Human	MPXV22/USA-OK-41	2022	Homo sapiens	OP351279
OP351280	Wed Jun 26 18:51:23 CDT 2024	MPXV; 2; B_isolate MPXV22/USA-OK-61	197199	OP351280	MPXV_OP351280	Virus_dsDNA_env; Poxviridae; Chordopoxvirinae; Orthopoxvirus; MPXV; 2; B	Monkeypox virus	Linear	OP351280 USA 2022	West Af	3	2	N America	USA	USA: OK	B	Human	MPXV22/USA-OK-61	2022	Homo sapiens	OP351280
OP351281	Wed Jun 26 18:51:23 CDT 2024	MPXV; 2; B_isolate MPXV22/USA-OK-66	197199	OP351281	MPXV_OP351281	Virus_dsDNA_env; Poxviridae; Chordopoxvirinae; Orthopoxvirus; MPXV; 2; B	Monkeypox virus	Linear	OP351281 USA 2022	West Af	3	2	N America	USA	USA: OK	B	Human	MPXV22/USA-OK-66	2022	Homo sapiens	OP351281
OP351282	Wed Jun 26 18:51:23 CDT 2024	MPXV; 2; B_isolate MPXV22/USA-OK-67	197199	OP351282	MPXV_OP351282	Virus_dsDNA_env; Poxviridae; Chordopoxvirinae; Orthopoxvirus; MPXV; 2; B	Monkeypox virus	Linear	OP351282 USA 2022	West Af	3	2	N America	USA	USA: OK	B	Human	MPXV22/USA-OK-67	2022	Homo sapiens	OP351282
OP351283	Wed Jun 26 18:51:23 CDT 2024	MPXV; 2; B_isolate MPXV22/USA-OK-68	197182	OP351283	MPXV_OP351283	Virus_dsDNA_env; Poxviridae; Chordopoxvirinae; Orthopoxvirus; MPXV; 2; B	Monkeypox virus	Linear	OP351283 USA 2022	West Af	3	2	N America	USA	USA: OK	B	Human	MPXV22/USA-OK-68	2022	Homo sapiens	OP351283
OP351284	Wed Jun 26 18:51:23 CDT 2024	MPXV; 2; B_isolate MPXV22/USA-OK-69	197182	OP351284	MPXV_OP351284	Virus_dsDNA_env; Poxviridae; Chordopoxvirinae; Orthopoxvirus; MPXV; 2; B	Monkeypox virus	Linear	OP351284 USA 2022	West Af	3	2	N America	USA	USA: OK	B	Human	MPXV22/USA-OK-69	2022	Homo sapiens	OP351284
OP351285	Wed Jun 26 18:51:23 CDT 2024	MPXV; 2; B_isolate MPXV22/USA-OK-86	197199	OP351285	MPXV_OP351285	Virus_dsDNA_env; Poxviridae; Chordopoxvirinae; Orthopoxvirus; MPXV; 2; B	Monkeypox virus	Linear	OP351285 USA 2022	West Af	3	2	N America	USA	USA: OK	B	Human	MPXV22/USA-OK-86	2022	Homo sapiens	OP351285
OP351286	Wed Jun 26 18:51:23 CDT 2024	MPXV; 2; B_isolate MPXV22/USA-OK-134	197179	OP351286	MPXV_OP351286	Virus_dsDNA_env; Poxviridae; Chordopoxvirinae; Orthopoxvirus; MPXV; 2; B	Monkeypox virus	Linear	OP351286 USA 2022	West Af	3	2	N America	USA	USA: OK	B	Human	MPXV22/USA-OK-134	2022	Homo sapiens	OP351286
OP351287	Wed Jun 26 18:51:23 CDT 2024	MPXV; 2; B_isolate MPXV22/USA-OK-149	197178	OP351287	MPXV_OP351287	Virus_dsDNA_env; Poxviridae; Chordopoxvirinae; Orthopoxvirus; MPXV; 2; B	Monkeypox virus	Linear	OP351287 USA 2022	West Af	3	2	N America	USA	USA: OK	B	Human	MPXV22/USA-OK-149	2022	Homo sapiens	OP351287
OP373386	Wed Jun 26 18:51:23 CDT 2024	MPXV; 2; B_isolate MPXV/Germany/2022/RKI328	197139	OP373386	MPXV_OP373386	Virus_dsDNA_env; Poxviridae; Chordopoxvirinae; Orthopoxvirus; MPXV; 2; B	Monkeypox virus	Linear	OP373386 DEU 2022	West Af	3	2	Europe	DEU	Germany	B	Human	MPXV/Germany/2022/RKI328	2022	Homo sapiens	OP373386
OP373388	Wed Jun 26 18:51:23 CDT 2024	MPXV; 2; B_isolate MPXV/Germany/2022/RKI330	197139	OP373388	MPXV_OP373388	Virus_dsDNA_env; Poxviridae; Chordopoxvirinae; Orthopoxvirus; MPXV; 2; B	Monkeypox virus	Linear	OP373388 DEU 2022	West Af	3	2	Europe	DEU	Germany	B	Human	MPXV/Germany/2022/RKI330	2022	Homo sapiens	OP373388
OP373389	Wed Jun 26 18:51:23 CDT 2024	MPXV; 2; B_isolate MPXV/Germany/2022/RKI331	197139	OP373389	MPXV_OP373389	Virus_dsDNA_env; Poxviridae; Chordopoxvirinae; Orthopoxvirus; MPXV; 2; B	Monkeypox virus	Linear	OP373389 DEU 2022	West Af	3	2	Europe	DEU	Germany	B	Human	MPXV/Germany/2022/RKI331	2022	Homo sapiens	OP373389
OP373390	Wed Jun 26 18:51:23 CDT 2024	MPXV; 2; B_isolate MPXV/Germany/2022/RKI332	197139	OP373390	MPXV_OP373390	Virus_dsDNA_env; Poxviridae; Chordopoxvirinae; Orthopoxvirus; MPXV; 2; B	Monkeypox virus	Linear	OP373390 DEU 2022	West Af	3	2	Europe	DEU	Germany	B	Human	MPXV/Germany/2022/RKI332	2022	Homo sapiens	OP373390
OP373391	Wed Jun 26 18:51:23 CDT 2024	MPXV; 2; B_isolate MPXV/Germany/2022/RKI333	197139	OP373391	MPXV_OP373391	Virus_dsDNA_env; Poxviridae; Chordopoxvirinae; Orthopoxvirus; MPXV; 2; B	Monkeypox virus	Linear	OP373391 DEU 2022	West Af	3	2	Europe	DEU	Germany	B	Human	MPXV/Germany/2022/RKI333	2022	Homo sapiens	OP373391
OP373392	Wed Jun 26 18:51:23 CDT 2024	MPXV; 2; B_isolate MPXV/Germany/2022/RKI334	197139	OP373392	MPXV_OP373392	Virus_dsDNA_env; Poxviridae; Chordopoxvirinae; Orthopoxvirus; MPXV; 2; B	Monkeypox virus	Linear	OP373392 DEU 2022	West Af	3	2	Europe	DEU	Germany	B	Human	MPXV/Germany/2022/RKI334	2022	Homo sapiens	OP373392
OP378693	Wed Jun 26 18:51:23 CDT 2024	MPXV; 2; B_isolate MPXV_USA_2022_DC0009	197032	OP378693	MPXV_OP378693	Virus_dsDNA_env; Poxviridae; Chordopoxvirinae; Orthopoxvirus; MPXV; 2; B	Monkeypox virus	Linear	OP378693 USA 2022	West Af	3	2	N America	USA	USA: DC	B	Human	MPXV_USA_2022_DC0009	2022	Homo sapiens	OP378693
OP378694	Wed Jun 26 18:51:23 CDT 2024	MPXV; 2; B_isolate MPXV_USA_2022_GA0006	197122	OP378694	MPXV_OP378694	Virus_dsDNA_env; Poxviridae; Chordopoxvirinae; Orthopoxvirus; MPXV; 2; B	Monkeypox virus	Linear	OP378694 USA 2022	West Af	3	2	N America	USA	USA: GA	B	Human	MPXV_USA_2022_GA0006	2022	Homo sapiens	OP378694
OP378695	Wed Jun 26 18:51:23 CDT 2024	MPXV; 2; B_isolate MPXV_USA_2022_DC0010	197025	OP378695	MPXV_OP378695	Virus_dsDNA_env; Poxviridae; Chordopoxvirinae; Orthopoxvirus; MPXV; 2; B	Monkeypox virus	Linear	OP378695 USA 2022	West Af	3	2	N America	USA	USA: DC	B	Human	MPXV_USA_2022_DC0010	2022	Homo sapiens	OP378695
OP378696	Wed Jun 26 18:51:23 CDT 2024	MPXV; 2; B_isolate MPXV_USA_2022_DC0008	197028	OP378696	MPXV_OP378696	Virus_dsDNA_env; Poxviridae; Chordopoxvirinae; Orthopoxvirus; MPXV; 2; B	Monkeypox virus	Linear	OP378696 USA 2022	West Af	3	2	N America	USA	USA: DC	B	Human	MPXV_USA_2022_DC0008	2022	Homo sapiens	OP378696
OP378697	Wed Jun 26 18:51:23 CDT 2024	MPXV; 2; B_isolate MPXV_USA_2022_GA0014	197026	OP378697	MPXV_OP378697	Virus_dsDNA_env; Poxviridae; Chordopoxvirinae; Orthopoxvirus; MPXV; 2; B	Monkeypox virus	Linear	OP378697 USA 2022	West Af	3	2	N America	USA	USA: GA	B	Human	MPXV_USA_2022_GA0014	2022	Homo sapiens	OP378697
OP378698	Wed Jun 26 18:51:23 CDT 2024	MPXV; 2; B_isolate MPXV_USA_2022_GA0007	197026	OP378698	MPXV_OP378698	Virus_dsDNA_env; Poxviridae; Chordopoxvirinae; Orthopoxvirus; MPXV; 2; B	Monkeypox virus	Linear	OP378698 USA 2022	West Af	3	2	N America	USA	USA: GA	B	Human	MPXV_USA_2022_GA0007	2022	Homo sapiens	OP378698
OP378699	Wed Jun 26 18:51:23 CDT 2024	MPXV; 2; B_isolate MPXV_USA_2022_GA0013	197028	OP378699	MPXV_OP378699	Virus_dsDNA_env; Poxviridae; Chordopoxvirinae; Orthopoxvirus; MPXV; 2; B	Monkeypox virus	Linear	OP378699 USA 2022	West Af	3	2	N America	USA	USA: GA	B	Human	MPXV_USA_2022_GA0013	2022	Homo sapiens	OP378699
OP378700	Wed Jun 26 18:51:23 CDT 2024	MPXV; 2; B_isolate MPXV_USA_2022_GA0015	197030	OP378700	MPXV_OP378700	Virus_dsDNA_env; Poxviridae; Chordopoxvirinae; Orthopoxvirus; MPXV; 2; B	Monkeypox virus	Linear	OP378700 USA 2022	West Af	3	2	N America	USA	USA: GA	B	Human	MPXV_USA_2022_GA0015	2022	Homo sapiens	OP378700
OP378701	Wed Jun 26 18:51:23 CDT 2024	MPXV; 2; B_isolate MPXV_USA_2022_NY0028	197029	OP378701	MPXV_OP378701	Virus_dsDNA_env; Poxviridae; Chordopoxvirinae; Orthopoxvirus; MPXV; 2; B	Monkeypox virus	Linear	OP378701 USA 2022	West Af	3	2	N America	USA	USA: NY	B	Human	MPXV_USA_2022_NY0028	2022	Homo sapiens	OP378701
OP378702	Wed Jun 26 18:51:23 CDT 2024	MPXV; 2; B_isolate MPXV_USA_2022_MI0001	197037	OP378702	MPXV_OP378702	Virus_dsDNA_env; Poxviridae; Chordopoxvirinae; Orthopoxvirus; MPXV; 2; B	Monkeypox virus	Linear	OP378702 USA 2022	West Af	3	2	N America	USA	USA: MI	B	Human	MPXV_USA_2022_MI0001	2022	Homo sapiens	OP378702
OP378703	Wed Jun 26 18:51:23 CDT 2024	MPXV; 2; B_isolate MPXV_USA_2022_HI0003	197130	OP378703	MPXV_OP378703	Virus_dsDNA_env; Poxviridae; Chordopoxvirinae; Orthopoxvirus; MPXV; 2; B	Monkeypox virus	Linear	OP378703 USA 2022	West Af	3	2	N America	USA	USA: HI	B	Human	MPXV_USA_2022_HI0003	2022	Homo sapiens	OP378703
OP378704	Wed Jun 26 18:51:23 CDT 2024	MPXV; 2; B_isolate MPXV_USA_2022_TX0010	197134	OP378704	MPXV_OP378704	Virus_dsDNA_env; Poxviridae; Chordopoxvirinae; Orthopoxvirus; MPXV; 2; B	Monkeypox virus	Linear	OP378704 USA 2022	West Af	3	2	N America	USA	USA: TX	B	Human	MPXV_USA_2022_TX0010	2022	Homo sapiens	OP378704
OP378705	Wed Jun 26 18:51:23 CDT 2024	MPXV; 2; B_isolate MPXV_USA_2022_TX0011	197124	OP378705	MPXV_OP378705	Virus_dsDNA_env; Poxviridae; Chordopoxvirinae; Orthopoxvirus; MPXV; 2; B	Monkeypox virus	Linear	OP378705 USA 2022	West Af	3	2	N America	USA	USA: TX	B	Human	MPXV_USA_2022_TX0011	2022	Homo sapiens	OP378705
OP378706	Wed Jun 26 18:51:23 CDT 2024	MPXV; 2; B_isolate MPXV_USA_2022_IL0053	197125	OP378706	MPXV_OP378706	Virus_dsDNA_env; Poxviridae; Chordopoxvirinae; Orthopoxvirus; MPXV; 2; B	Monkeypox virus	Linear	OP378706 USA 2022	West Af	3	2	N America	USA	USA: IL	B	Human	MPXV_USA_2022_IL0053	2022	Homo sapiens	OP378706
OP378707	Wed Jun 26 18:51:23 CDT 2024	MPXV; 2; B_isolate MPXV_USA_2022_VA0004	197034	OP378707	MPXV_OP378707	Virus_dsDNA_env; Poxviridae; Chordopoxvirinae; Orthopoxvirus; MPXV; 2; B	Monkeypox virus	Linear	OP378707 USA 2022	West Af	3	2	N America	USA	USA: VA	B	Human	MPXV_USA_2022_VA0004	2022	Homo sapiens	OP378707
OP378708	Wed Jun 26 18:51:23 CDT 2024	MPXV; 2; B_isolate MPXV_USA_2022_VA0005	197135	OP378708	MPXV_OP378708	Virus_dsDNA_env; Poxviridae; Chordopoxvirinae; Orthopoxvirus; MPXV; 2; B	Monkeypox virus	Linear	OP378708 USA 2022	West Af	3	2	N America	USA	USA: VA	B	Human	MPXV_USA_2022_VA0005	2022	Homo sapiens	OP378708
OP378709	Wed Jun 26 18:51:23 CDT 2024	MPXV; 2; B_isolate MPXV_USA_2022_PA0006	197034	OP378709	MPXV_OP378709	Virus_dsDNA_env; Poxviridae; Chordopoxvirinae; Orthopoxvirus; MPXV; 2; B	Monkeypox virus	Linear	OP378709 USA 2022	West Af	3	2	N America	USA	USA: PA	B	Human	MPXV_USA_2022_PA0006	2022	Homo sapiens	OP378709
OP378710	Wed Jun 26 18:51:23 CDT 2024	MPXV; 2; B_isolate MPXV_USA_2022_VA0007	197030	OP378710	MPXV_OP378710	Virus_dsDNA_env; Poxviridae; Chordopoxvirinae; Orthopoxvirus; MPXV; 2; B	Monkeypox virus	Linear	OP378710 USA 2022	West Af	3	2	N America	USA	USA: VA	B	Human	MPXV_USA_2022_VA0007	2022	Homo sapiens	OP378710
OP378711	Wed Jun 26 18:51:23 CDT 2024	MPXV; 2; B_isolate MPXV_USA_2022_VA0008	197036	OP378711	MPXV_OP378711	Virus_dsDNA_env; Poxviridae; Chordopoxvirinae; Orthopoxvirus; MPXV; 2; B	Monkeypox virus	Linear	OP378711 USA 2022	West Af	3	2	N America	USA	USA: VA	B	Human	MPXV_USA_2022_VA0008	2022	Homo sapiens	OP378711
OP392531	Wed Jun 26 18:51:23 CDT 2024	MPXV; 2; B_isolate MPXV/USA/OH-UW-071356/2022	197186	OP392531	MPXV_OP392531	Virus_dsDNA_env; Poxviridae; Chordopoxvirinae; Orthopoxvirus; MPXV; 2; B	Monkeypox virus	Linear	OP392531 USA 2022	West Af	3	2	N America	USA	USA: OH	B	Human	MPXV/USA/OH-UW-071356/2022	2022	Homo sapiens	OP392531
OP392532	Wed Jun 26 18:51:23 CDT 2024	MPXV; 2; B_isolate MPXV/USA/OH-UW-080114/2022	197205	OP392532	MPXV_OP392532	Virus_dsDNA_env; Poxviridae; Chordopoxvirinae; Orthopoxvirus; MPXV; 2; B	Monkeypox virus	Linear	OP392532 USA 2022	West Af	3	2	N America	USA	USA: OH	B	Human	MPXV/USA/OH-UW-080114/2022	2022	Homo sapiens	OP392532
OP392533	Wed Jun 26 18:51:23 CDT 2024	MPXV; 2; B_isolate MPXV/USA/OH-UW-085672/2022	197194	OP392533	MPXV_OP392533	Virus_dsDNA_env; Poxviridae; Chordopoxvirinae; Orthopoxvirus; MPXV; 2; B	Monkeypox virus	Linear	OP392533 USA 2022	West Af	3	2	N America	USA	USA: OH	B	Human	MPXV/USA/OH-UW-085672/2022	2022	Homo sapiens	OP392533
OP392534	Wed Jun 26 18:51:23 CDT 2024	MPXV; 2; B_isolate MPXV/USA/OH-UW-089384/2022	197193	OP392534	MPXV_OP392534	Virus_dsDNA_env; Poxviridae; Chordopoxvirinae; Orthopoxvirus; MPXV; 2; B	Monkeypox virus	Linear	OP392534 USA 2022	West Af	3	2	N America	USA	USA: OH	B	Human	MPXV/USA/OH-UW-089384/2022	2022	Homo sapiens	OP392534
OP392535	Wed Jun 26 18:51:23 CDT 2024	MPXV; 2; B_isolate MPXV/USA/WA-UW-080100/2022	197191	OP392535	MPXV_OP392535	Virus_dsDNA_env; Poxviridae; Chordopoxvirinae; Orthopoxvirus; MPXV; 2; B	Monkeypox virus	Linear	OP392535 USA 2022	West Af	3	2	N America	USA	USA: WA	B	Human	MPXV/USA/WA-UW-080100/2022	2022	Homo sapiens	OP392535
OP392536	Wed Jun 26 18:51:23 CDT 2024	MPXV; 2; B_isolate MPXV/USA/WA-UW-080292/2022	197205	OP392536	MPXV_OP392536	Virus_dsDNA_env; Poxviridae; Chordopoxvirinae; Orthopoxvirus; MPXV; 2; B	Monkeypox virus	Linear	OP392536 USA 2022	West Af	3	2	N America	USA	USA: WA	B	Human	MPXV/USA/WA-UW-080292/2022	2022	Homo sapiens	OP392536
OP392538	Wed Jun 26 18:51:23 CDT 2024	MPXV; 2; B_isolate MPXV/USA/WA-UW-081714/2022	197192	OP392538	MPXV_OP392538	Virus_dsDNA_env; Poxviridae; Chordopoxvirinae; Orthopoxvirus; MPXV; 2; B	Monkeypox virus	Linear	OP392538 USA 2022	West Af	3	2	N America	USA	USA: WA	B	Human	MPXV/USA/WA-UW-081714/2022	2022	Homo sapiens	OP392538
OP392539	Wed Jun 26 18:51:23 CDT 2024	MPXV; 2; B_isolate MPXV/USA/WA-UW-082215/2022	197203	OP392539	MPXV_OP392539	Virus_dsDNA_env; Poxviridae; Chordopoxvirinae; Orthopoxvirus; MPXV; 2; B	Monkeypox virus	Linear	OP392539 USA 2022	West Af	3	2	N America	USA	USA: WA	B	Human	MPXV/USA/WA-UW-082215/2022	2022	Homo sapiens	OP392539
OP392540	Wed Jun 26 18:51:23 CDT 2024	MPXV; 2; B_isolate MPXV/USA/WA-UW-082770/2022	197191	OP392540	MPXV_OP392540	Virus_dsDNA_env; Poxviridae; Chordopoxvirinae; Orthopoxvirus; MPXV; 2; B	Monkeypox virus	Linear	OP392540 USA 2022	West Af	3	2	N America	USA	USA: WA	B	Human	MPXV/USA/WA-UW-082770/2022	2022	Homo sapiens	OP392540
OP392541	Wed Jun 26 18:51:23 CDT 2024	MPXV; 2; B_isolate MPXV/USA/WA-UW-082880/2022	197202	OP392541	MPXV_OP392541	Virus_dsDNA_env; Poxviridae; Chordopoxvirinae; Orthopoxvirus; MPXV; 2; B	Monkeypox virus	Linear	OP392541 USA 2022	West Af	3	2	N America	USA	USA: WA	B	Human	MPXV/USA/WA-UW-082880/2022	2022	Homo sapiens	OP392541
OP392542	Wed Jun 26 18:51:23 CDT 2024	MPXV; 2; B_isolate MPXV/USA/WA-UW-083506/2022	197192	OP392542	MPXV_OP392542	Virus_dsDNA_env; Poxviridae; Chordopoxvirinae; Orthopoxvirus; MPXV; 2; B	Monkeypox virus	Linear	OP392542 USA 2022	West Af	3	2	N America	USA	USA: WA	B	Human	MPXV/USA/WA-UW-083506/2022	2022	Homo sapiens	OP392542
OP392543	Wed Jun 26 18:51:23 CDT 2024	MPXV; 2; B_isolate MPXV/USA/WA-UW-083584/2022	197207	OP392543	MPXV_OP392543	Virus_dsDNA_env; Poxviridae; Chordopoxvirinae; Orthopoxvirus; MPXV; 2; B	Monkeypox virus	Linear	OP392543 USA 2022	West Af	3	2	N America	USA	USA: WA	B	Human	MPXV/USA/WA-UW-083584/2022	2022	Homo sapiens	OP392543
OP392544	Wed Jun 26 18:51:23 CDT 2024	MPXV; 2; B_isolate MPXV/USA/WA-UW-083781/2022	197197	OP392544	MPXV_OP392544	Virus_dsDNA_env; Poxviridae; Chordopoxvirinae; Orthopoxvirus; MPXV; 2; B	Monkeypox virus	Linear	OP392544 USA 2022	West Af	3	2	N America	USA	USA: WA	B	Human	MPXV/USA/WA-UW-083781/2022	2022	Homo sapiens	OP392544
OP392545	Wed Jun 26 18:51:23 CDT 2024	MPXV; 2; B_isolate MPXV/USA/WA-UW-084148/2022	197205	OP392545	MPXV_OP392545	Virus_dsDNA_env; Poxviridae; Chordopoxvirinae; Orthopoxvirus; MPXV; 2; B	Monkeypox virus	Linear	OP392545 USA 2022	West Af	3	2	N America	USA	USA: WA	B	Human	MPXV/USA/WA-UW-084148/2022	2022	Homo sapiens	OP392545
OP392546	Wed Jun 26 18:51:23 CDT 2024	MPXV; 2; B_isolate MPXV/USA/WA-UW-085171/2022	197190	OP392546	MPXV_OP392546	Virus_dsDNA_env; Poxviridae; Chordopoxvirinae; Orthopoxvirus; MPXV; 2; B	Monkeypox virus	Linear	OP392546 USA 2022	West Af	3	2	N America	USA	USA: WA	B	Human	MPXV/USA/WA-UW-085171/2022	2022	Homo sapiens	OP392546
OP392547	Wed Jun 26 18:51:23 CDT 2024	MPXV; 2; B_isolate MPXV/USA/WA-UW-085462/2022	197192	OP392547	MPXV_OP392547	Virus_dsDNA_env; Poxviridae; Chordopoxvirinae; Orthopoxvirus; MPXV; 2; B	Monkeypox virus	Linear	OP392547 USA 2022	West Af	3	2	N America	USA	USA: WA	B	Human	MPXV/USA/WA-UW-085462/2022	2022	Homo sapiens	OP392547
OP392548	Wed Jun 26 18:51:23 CDT 2024	MPXV; 2; B_isolate MPXV/USA/WA-UW-087094/2022	197194	OP392548	MPXV_OP392548	Virus_dsDNA_env; Poxviridae; Chordopoxvirinae; Orthopoxvirus; MPXV; 2; B	Monkeypox virus	Linear	OP392548 USA 2022	West Af	3	2	N America	USA	USA: WA	B	Human	MPXV/USA/WA-UW-087094/2022	2022	Homo sapiens	OP392548
OP392549	Wed Jun 26 18:51:23 CDT 2024	MPXV; 2; B_isolate MPXV/USA/WA-UW-087104/2022	197192	OP392549	MPXV_OP392549	Virus_dsDNA_env; Poxviridae; Chordopoxvirinae; Orthopoxvirus; MPXV; 2; B	Monkeypox virus	Linear	OP392549 USA 2022	West Af	3	2	N America	USA	USA: WA	B	Human	MPXV/USA/WA-UW-087104/2022	2022	Homo sapiens	OP392549
OP392551	Wed Jun 26 18:51:23 CDT 2024	MPXV; 2; B_isolate MPXV/USA/WA-UW-088092/2022	197191	OP392551	MPXV_OP392551	Virus_dsDNA_env; Poxviridae; Chordopoxvirinae; Orthopoxvirus; MPXV; 2; B	Monkeypox virus	Linear	OP392551 USA 2022	West Af	3	2	N America	USA	USA: WA	B	Human	MPXV/USA/WA-UW-088092/2022	2022	Homo sapiens	OP392551
OP392552	Wed Jun 26 18:51:23 CDT 2024	MPXV; 2; B_isolate MPXV/USA/WA-UW-088325/2022	197191	OP392552	MPXV_OP392552	Virus_dsDNA_env; Poxviridae; Chordopoxvirinae; Orthopoxvirus; MPXV; 2; B	Monkeypox virus	Linear	OP392552 USA 2022	West Af	3	2	N America	USA	USA: WA	B	Human	MPXV/USA/WA-UW-088325/2022	2022	Homo sapiens	OP392552
OP392553	Wed Jun 26 18:51:23 CDT 2024	MPXV; 2; B_isolate MPXV/USA/WA-UW-088960/2022	197193	OP392553	MPXV_OP392553	Virus_dsDNA_env; Poxviridae; Chordopoxvirinae; Orthopoxvirus; MPXV; 2; B	Monkeypox virus	Linear	OP392553 USA 2022	West Af	3	2	N America	USA	USA: WA	B	Human	MPXV/USA/WA-UW-088960/2022	2022	Homo sapiens	OP392553
OP394229	Wed Jun 26 18:51:23 CDT 2024	MPXV; 2; B_isolate 9000220_NCPV_1703	197205	OP394229	MPXV_OP394229	Virus_dsDNA_env; Poxviridae; Chordopoxvirinae; Orthopoxvirus; MPXV; 2; B	Monkeypox virus	Linear	OP394229 GBR 2022	West Af	3	2	Europe	GBR	United Kingdom	B	Human	9000220_NCPV_1703	2022	Homo sapiens	OP394229
OP413713	Wed Jun 26 18:51:23 CDT 2024	MPXV; 2; B_isolate 9000231	197205	OP413713	MPXV_OP413713	Virus_dsDNA_env; Poxviridae; Chordopoxvirinae; Orthopoxvirus; MPXV; 2; B	Monkeypox virus	Linear	OP413713 GBR 2022	West Af	3	2	Europe	GBR	United Kingdom	B	Human	9000231	2022	Homo sapiens	OP413713
OP413714	Wed Jun 26 18:51:23 CDT 2024	MPXV; 2; B_isolate 9000289	197202	OP413714	MPXV_OP413714	Virus_dsDNA_env; Poxviridae; Chordopoxvirinae; Orthopoxvirus; MPXV; 2; B	Monkeypox virus	Linear	OP413714 GBR 2022	West Af	3	2	Europe	GBR	United Kingdom	B	Human	9000289	2022	Homo sapiens	OP413714
OP413715	Wed Jun 26 18:51:23 CDT 2024	MPXV; 2; B_isolate 9000327	197205	OP413715	MPXV_OP413715	Virus_dsDNA_env; Poxviridae; Chordopoxvirinae; Orthopoxvirus; MPXV; 2; B	Monkeypox virus	Linear	OP413715 GBR 2022	West Af	3	2	Europe	GBR	United Kingdom	B	Human	9000327	2022	Homo sapiens	OP413715
OP413716	Wed Jun 26 18:51:23 CDT 2024	MPXV; 2; B_isolate 9000351	197205	OP413716	MPXV_OP413716	Virus_dsDNA_env; Poxviridae; Chordopoxvirinae; Orthopoxvirus; MPXV; 2; B	Monkeypox virus	Linear	OP413716 GBR 2022	West Af	3	2	Europe	GBR	United Kingdom	B	Human	9000351	2022	Homo sapiens	OP413716
OP413717	Wed Jun 26 18:51:23 CDT 2024	MPXV; 2; B_isolate 9000353	197205	OP413717	MPXV_OP413717	Virus_dsDNA_env; Poxviridae; Chordopoxvirinae; Orthopoxvirus; MPXV; 2; B	Monkeypox virus	Linear	OP413717 GBR 2022	West Af	3	2	Europe	GBR	United Kingdom	B	Human	9000353	2022	Homo sapiens	OP413717
OP413718	Wed Jun 26 18:51:23 CDT 2024	MPXV; 2; B_isolate 9000360	197211	OP413718	MPXV_OP413718	Virus_dsDNA_env; Poxviridae; Chordopoxvirinae; Orthopoxvirus; MPXV; 2; B	Monkeypox virus	Linear	OP413718 GBR 2022	West Af	2	2	Europe	GBR	United Kingdom	B	Human	9000360	2022	Homo sapiens	OP413718
OP415180	Wed Jun 26 18:51:23 CDT 2024	MPXV; 2; B_isolate MPX_CJjutN_9000198	197205	OP415180	MPXV_OP415180	Virus_dsDNA_env; Poxviridae; Chordopoxvirinae; Orthopoxvirus; MPXV; 2; B	Monkeypox virus	Linear	OP415180 GBR 2022	West Af	3	2	Europe	GBR	United Kingdom	B	Human	MPX_CJjutN_9000198	2022	Homo sapiens	OP415180
OP415182	Wed Jun 26 18:51:23 CDT 2024	MPXV; 2; B_isolate MPX_Yob5K4_9000201	197205	OP415182	MPXV_OP415182	Virus_dsDNA_env; Poxviridae; Chordopoxvirinae; Orthopoxvirus; MPXV; 2; B	Monkeypox virus	Linear	OP415182 GBR 2022	West Af	3	2	Europe	GBR	United Kingdom	B	Human	MPX_Yob5K4_9000201	2022	Homo sapiens	OP415182
OP415183	Wed Jun 26 18:51:23 CDT 2024	MPXV; 2; B_isolate MPX_Yob5K4_9000202	197205	OP415183	MPXV_OP415183	Virus_dsDNA_env; Poxviridae; Chordopoxvirinae; Orthopoxvirus; MPXV; 2; B	Monkeypox virus	Linear	OP415183 GBR 2022	West Af	3	2	Europe	GBR	United Kingdom	B	Human	MPX_Yob5K4_9000202	2022	Homo sapiens	OP415183
OP415184	Wed Jun 26 18:51:23 CDT 2024	MPXV; 2; B_isolate MPX_h9DUQg_9000203	197205	OP415184	MPXV_OP415184	Virus_dsDNA_env; Poxviridae; Chordopoxvirinae; Orthopoxvirus; MPXV; 2; B	Monkeypox virus	Linear	OP415184 GBR 2022	West Af	3	2	Europe	GBR	United Kingdom	B	Human	MPX_h9DUQg_9000203	2022	Homo sapiens	OP415184
OP415186	Wed Jun 26 18:51:23 CDT 2024	MPXV; 2; B_isolate MPX_cmjxZM_9000205	197205	OP415186	MPXV_OP415186	Virus_dsDNA_env; Poxviridae; Chordopoxvirinae; Orthopoxvirus; MPXV; 2; B	Monkeypox virus	Linear	OP415186 GBR 2022	West Af	3	2	Europe	GBR	United Kingdom	B	Human	MPX_cmjxZM_9000205	2022	Homo sapiens	OP415186
OP415187	Wed Jun 26 18:51:23 CDT 2024	MPXV; 2; B_isolate MPX_Q9BB92_9000206	197205	OP415187	MPXV_OP415187	Virus_dsDNA_env; Poxviridae; Chordopoxvirinae; Orthopoxvirus; MPXV; 2; B	Monkeypox virus	Linear	OP415187 GBR 2022	West Af	3	2	Europe	GBR	United Kingdom	B	Human	MPX_Q9BB92_9000206	2022	Homo sapiens	OP415187
OP415188	Wed Jun 26 18:51:23 CDT 2024	MPXV; 2; B_isolate MPX_dDDHx_9000207	197191	OP415188	MPXV_OP415188	Virus_dsDNA_env; Poxviridae; Chordopoxvirinae; Orthopoxvirus; MPXV; 2; B	Monkeypox virus	Linear	OP415188 GBR 2022	West Af	3	2	Europe	GBR	United Kingdom	B	Human	MPX_dDDHx_9000207	2022	Homo sapiens	OP415188
OP415189	Wed Jun 26 18:51:23 CDT 2024	MPXV; 2; B_isolate MPX_luLfgA_9000208	197191	OP415189	MPXV_OP415189	Virus_dsDNA_env; Poxviridae; Chordopoxvirinae; Orthopoxvirus; MPXV; 2; B	Monkeypox virus	Linear	OP415189 GBR 2022	West Af	3	2	Europe	GBR	United Kingdom	B	Human	MPX_luLfgA_9000208	2022	Homo sapiens	OP415189
OP415190	Wed Jun 26 18:51:23 CDT 2024	MPXV; 2; B_isolate MPX_KJ3uDD_9000210	197204	OP415190	MPXV_OP415190	Virus_dsDNA_env; Poxviridae; Chordopoxvirinae; Orthopoxvirus; MPXV; 2; B	Monkeypox virus	Linear	OP415190 GBR 2022	West Af	3	2	Europe	GBR	United Kingdom	B	Human	MPX_KJ3uDD_9000210	2022	Homo sapiens	OP415190
OP415192	Wed Jun 26 18:51:23 CDT 2024	MPXV; 2; B_isolate MPX_Qi7K5L_9000213	197205	OP415192	MPXV_OP415192	Virus_dsDNA_env; Poxviridae; Chordopoxvirinae; Orthopoxvirus; MPXV; 2; B	Monkeypox virus	Linear	OP415192 GBR 2022	West Af	3	2	Europe	GBR	United Kingdom	B	Human	MPX_Qi7K5L_9000213	2022	Homo sapiens	OP415192
OP415193	Wed Jun 26 18:51:23 CDT 2024	MPXV; 2; B_isolate MPX_gOirGi_9000215	197205	OP415193	MPXV_OP415193	Virus_dsDNA_env; Poxviridae; Chordopoxvirinae; Orthopoxvirus; MPXV; 2; B	Monkeypox virus	Linear	OP415193 GBR 2022	West Af	3	2	Europe	GBR	United Kingdom	B	Human	MPX_gOirGi_9000215	2022	Homo sapiens	OP415193
OP415194	Wed Jun 26 18:51:23 CDT 2024	MPXV; 2; B_isolate MPX_96X1Vd_9000216	197166	OP415194	MPXV_OP415194	Virus_dsDNA_env; Poxviridae; Chordopoxvirinae; Orthopoxvirus; MPXV; 2; B	Monkeypox virus	Linear	OP415194 GBR 2022	West Af	3	2	Europe	GBR	United Kingdom	B	Human	MPX_96X1Vd_9000216	2022	Homo sapiens	OP415194
OP415195	Wed Jun 26 18:51:23 CDT 2024	MPXV; 2; B_isolate MPX_96X1Vd_9000217	197205	OP415195	MPXV_OP415195	Virus_dsDNA_env; Poxviridae; Chordopoxvirinae; Orthopoxvirus; MPXV; 2; B	Monkeypox virus	Linear	OP415195 GBR 2022	West Af	3	2	Europe	GBR	United Kingdom	B	Human	MPX_96X1Vd_9000217	2022	Homo sapiens	OP415195
OP415196	Wed Jun 26 18:51:23 CDT 2024	MPXV; 2; B_isolate MPX_96X1Vd_9000218	197205	OP415196	MPXV_OP415196	Virus_dsDNA_env; Poxviridae; Chordopoxvirinae; Orthopoxvirus; MPXV; 2; B	Monkeypox virus	Linear	OP415196 GBR 2022	West Af	3	2	Europe	GBR	United Kingdom	B	Human	MPX_96X1Vd_9000218	2022	Homo sapiens	OP415196
OP415197	Wed Jun 26 18:51:23 CDT 2024	MPXV; 2; B_isolate MPX_2v76E1_9000221	197205	OP415197	MPXV_OP415197	Virus_dsDNA_env; Poxviridae; Chordopoxvirinae; Orthopoxvirus; MPXV; 2; B	Monkeypox virus	Linear	OP415197 GBR 2022	West Af	3	2	Europe	GBR	United Kingdom	B	Human	MPX_2v76E1_9000221	2022	Homo sapiens	OP415197
OP415198	Wed Jun 26 18:51:23 CDT 2024	MPXV; 2; B_isolate MPX_2v76E1_9000222	197205	OP415198	MPXV_OP415198	Virus_dsDNA_env; Poxviridae; Chordopoxvirinae; Orthopoxvirus; MPXV; 2; B	Monkeypox virus	Linear	OP415198 GBR 2022	West Af	3	2	Europe	GBR	United Kingdom	B	Human	MPX_2v76E1_9000222	2022	Homo sapiens	OP415198
OP415199	Wed Jun 26 18:51:23 CDT 2024	MPXV; 2; B_isolate MPX_K1dQNt_9000223	197205	OP415199	MPXV_OP415199	Virus_dsDNA_env; Poxviridae; Chordopoxvirinae; Orthopoxvirus; MPXV; 2; B	Monkeypox virus	Linear	OP415199 GBR 2022	West Af	3	2	Europe	GBR	United Kingdom	B	Human	MPX_K1dQNt_9000223	2022	Homo sapiens	OP415199
OP415200	Wed Jun 26 18:51:23 CDT 2024	MPXV; 2; B_isolate MPX_K1dQNt_9000224	197205	OP415200	MPXV_OP415200	Virus_dsDNA_env; Poxviridae; Chordopoxvirinae; Orthopoxvirus; MPXV; 2; B	Monkeypox virus	Linear	OP415200 GBR 2022	West Af	3	2	Europe	GBR	United Kingdom	B	Human	MPX_K1dQNt_9000224	2022	Homo sapiens	OP415200
OP415201	Wed Jun 26 18:51:23 CDT 2024	MPXV; 2; B_isolate MPX_K1dQNt_9000225	197205	OP415201	MPXV_OP415201	Virus_dsDNA_env; Poxviridae; Chordopoxvirinae; Orthopoxvirus; MPXV; 2; B	Monkeypox virus	Linear	OP415201 GBR 2022	West Af	3	2	Europe	GBR	United Kingdom	B	Human	MPX_K1dQNt_9000225	2022	Homo sapiens	OP415201
OP415202	Wed Jun 26 18:51:23 CDT 2024	MPXV; 2; B_isolate MPX_fZLVcc_9000227	197205	OP415202	MPXV_OP415202	Virus_dsDNA_env; Poxviridae; Chordopoxvirinae; Orthopoxvirus; MPXV; 2; B	Monkeypox virus	Linear	OP415202 GBR 2022	West Af	3	2	Europe	GBR	United Kingdom	B	Human	MPX_fZLVcc_9000227	2022	Homo sapiens	OP415202
OP415203	Wed Jun 26 18:51:23 CDT 2024	MPXV; 2; B_isolate MPX_fZLVcc_9000228	197205	OP415203	MPXV_OP415203	Virus_dsDNA_env; Poxviridae; Chordopoxvirinae; Orthopoxvirus; MPXV; 2; B	Monkeypox virus	Linear	OP415203 GBR 2022	West Af	3	2	Europe	GBR	United Kingdom	B	Human	MPX_fZLVcc_9000228	2022	Homo sapiens	OP415203
OP415204	Wed Jun 26 18:51:23 CDT 2024	MPXV; 2; B_isolate MPX_fZLVcc_9000229	197205	OP415204	MPXV_OP415204	Virus_dsDNA_env; Poxviridae; Chordopoxvirinae; Orthopoxvirus; MPXV; 2; B	Monkeypox virus	Linear	OP415204 GBR 2022	West Af	3	2	Europe	GBR	United Kingdom	B	Human	MPX_fZLVcc_9000229	2022	Homo sapiens	OP415204
OP415205	Wed Jun 26 18:51:23 CDT 2024	MPXV; 2; B_isolate MPX_TcUINH_9000230	197205	OP415205	MPXV_OP415205	Virus_dsDNA_env; Poxviridae; Chordopoxvirinae; Orthopoxvirus; MPXV; 2; B	Monkeypox virus	Linear	OP415205 GBR 2022	West Af	3	2	Europe	GBR	United Kingdom	B	Human	MPX_TcUINH_9000230	2022	Homo sapiens	OP415205
OP415206	Wed Jun 26 18:51:23 CDT 2024	MPXV; 2; B_isolate MPX_BhVKjm_9000232	197168	OP415206	MPXV_OP415206	Virus_dsDNA_env; Poxviridae; Chordopoxvirinae; Orthopoxvirus; MPXV; 2; B	Monkeypox virus	Linear	OP415206 GBR 2022	West Af	3	2	Europe	GBR	United Kingdom	B	Human	MPX_BhVKjm_9000232	2022	Homo sapiens	OP415206
OP415207	Wed Jun 26 18:51:23 CDT 2024	MPXV; 2; B_isolate MPX_BhVKjm_9000233	197208	OP415207	MPXV_OP415207	Virus_dsDNA_env; Poxviridae; Chordopoxvirinae; Orthopoxvirus; MPXV; 2; B	Monkeypox virus	Linear	OP415207 GBR 2022	West Af	3	2	Europe	GBR	United Kingdom	B	Human	MPX_BhVKjm_9000233	2022	Homo sapiens	OP415207
OP415208	Wed Jun 26 18:51:23 CDT 2024	MPXV; 2; B_isolate MPX_Fap1fz_9000234	197203	OP415208	MPXV_OP415208	Virus_dsDNA_env; Poxviridae; Chordopoxvirinae; Orthopoxvirus; MPXV; 2; B	Monkeypox virus	Linear	OP415208 GBR 2022	West Af	3	2	Europe	GBR	United Kingdom	B	Human	MPX_Fap1fz_9000234	2022	Homo sapiens	OP415208
OP415209	Wed Jun 26 18:51:23 CDT 2024	MPXV; 2; B_isolate MPX_Fap1fz_9000235	197205	OP415209	MPXV_OP415209	Virus_dsDNA_env; Poxviridae; Chordopoxvirinae; Orthopoxvirus; MPXV; 2; B	Monkeypox virus	Linear	OP415209 GBR 2022	West Af	3	2	Europe	GBR	United Kingdom	B	Human	MPX_Fap1fz_9000235	2022	Homo sapiens	OP415209
OP415210	Wed Jun 26 18:51:23 CDT 2024	MPXV; 2; B_isolate MPX_KMgssq_9000236	197205	OP415210	MPXV_OP415210	Virus_dsDNA_env; Poxviridae; Chordopoxvirinae; Orthopoxvirus; MPXV; 2; B	Monkeypox virus	Linear	OP415210 GBR 2022	West Af	3	2	Europe	GBR	United Kingdom	B	Human	MPX_KMgssq_9000236	2022	Homo sapiens	OP415210
OP415211	Wed Jun 26 18:51:23 CDT 2024	MPXV; 2; B_isolate MPX_KMgssq_9000237	197205	OP415211	MPXV_OP415211	Virus_dsDNA_env; Poxviridae; Chordopoxvirinae; Orthopoxvirus; MPXV; 2; B	Monkeypox virus	Linear	OP415211 GBR 2022	West Af	3	2	Europe	GBR	United Kingdom	B	Human	MPX_KMgssq_9000237	2022	Homo sapiens	OP415211
OP415212	Wed Jun 26 18:51:23 CDT 2024	MPXV; 2; B_isolate MPX_UbfBKN_9000238	197205	OP415212	MPXV_OP415212	Virus_dsDNA_env; Poxviridae; Chordopoxvirinae; Orthopoxvirus; MPXV; 2; B	Monkeypox virus	Linear	OP415212 GBR 2022	West Af	3	2	Europe	GBR	United Kingdom	B	Human	MPX_UbfBKN_9000238	2022	Homo sapiens	OP415212
OP415213	Wed Jun 26 18:51:23 CDT 2024	MPXV; 2; B_isolate MPX_UbfBKN_9000239	197205	OP415213	MPXV_OP415213	Virus_dsDNA_env; Poxviridae; Chordopoxvirinae; Orthopoxvirus; MPXV; 2; B	Monkeypox virus	Linear	OP415213 GBR 2022	West Af	3	2	Europe	GBR	United Kingdom	B	Human	MPX_UbfBKN_9000239	2022	Homo sapiens	OP415213
OP415214	Wed Jun 26 18:51:23 CDT 2024	MPXV; 2; B_isolate MPX_42KDT6_9000240	197205	OP415214	MPXV_OP415214	Virus_dsDNA_env; Poxviridae; Chordopoxvirinae; Orthopoxvirus; MPXV; 2; B	Monkeypox virus	Linear	OP415214 GBR 2022	West Af	3	2	Europe	GBR	United Kingdom	B	Human	MPX_42KDT6_9000240	2022	Homo sapiens	OP415214
OP415215	Wed Jun 26 18:51:23 CDT 2024	MPXV; 2; B_isolate MPX_42KDT6_9000241	197205	OP415215	MPXV_OP415215	Virus_dsDNA_env; Poxviridae; Chordopoxvirinae; Orthopoxvirus; MPXV; 2; B	Monkeypox virus	Linear	OP415215 GBR 2022	West Af	3	2	Europe	GBR	United Kingdom	B	Human	MPX_42KDT6_9000241	2022	Homo sapiens	OP415215
OP415216	Wed Jun 26 18:51:23 CDT 2024	MPXV; 2; B_isolate MPX_OXSHAI_9000245	197205	OP415216	MPXV_OP415216	Virus_dsDNA_env; Poxviridae; Chordopoxvirinae; Orthopoxvirus; MPXV; 2; B	Monkeypox virus	Linear	OP415216 GBR 2022	West Af	3	2	Europe	GBR	United Kingdom	B	Human	MPX_OXSHAI_9000245	2022	Homo sapiens	OP415216
OP415218	Wed Jun 26 18:51:23 CDT 2024	MPXV; 2; B_isolate MPX_V5dRAI_9000247	197205	OP415218	MPXV_OP415218	Virus_dsDNA_env; Poxviridae; Chordopoxvirinae; Orthopoxvirus; MPXV; 2; B	Monkeypox virus	Linear	OP415218 GBR 2022	West Af	3	2	Europe	GBR	United Kingdom	B	Human	MPX_V5dRAI_9000247	2022	Homo sapiens	OP415218
OP415219	Wed Jun 26 18:51:23 CDT 2024	MPXV; 2; B_isolate MPX_AooXJI_9000248	197205	OP415219	MPXV_OP415219	Virus_dsDNA_env; Poxviridae; Chordopoxvirinae; Orthopoxvirus; MPXV; 2; B	Monkeypox virus	Linear	OP415219 GBR 2022	West Af	3	2	Europe	GBR	United Kingdom	B	Human	MPX_AooXJI_9000248	2022	Homo sapiens	OP415219
OP415221	Wed Jun 26 18:51:23 CDT 2024	MPXV; 2; B_isolate MPX_diQWGf_9000250	197205	OP415221	MPXV_OP415221	Virus_dsDNA_env; Poxviridae; Chordopoxvirinae; Orthopoxvirus; MPXV; 2; B	Monkeypox virus	Linear	OP415221 GBR 2022	West Af	3	2	Europe	GBR	United Kingdom	B	Human	MPX_diQWGf_9000250	2022	Homo sapiens	OP415221
OP415222	Wed Jun 26 18:51:23 CDT 2024	MPXV; 2; B_isolate MPX_12DvO8_9000251	197205	OP415222	MPXV_OP415222	Virus_dsDNA_env; Poxviridae; Chordopoxvirinae; Orthopoxvirus; MPXV; 2; B	Monkeypox virus	Linear	OP415222 GBR 2022	West Af	3	2	Europe	GBR	United Kingdom	B	Human	MPX_12DvO8_9000251	2022	Homo sapiens	OP415222
OP415223	Wed Jun 26 18:51:23 CDT 2024	MPXV; 2; B_isolate MPX_jpMpSR_9000252	197205	OP415223	MPXV_OP415223	Virus_dsDNA_env; Poxviridae; Chordopoxvirinae; Orthopoxvirus; MPXV; 2; B	Monkeypox virus	Linear	OP415223 GBR 2022	West Af	3	2	Europe	GBR	United Kingdom	B	Human	MPX_jpMpSR_9000252	2022	Homo sapiens	OP415223
OP415224	Wed Jun 26 18:51:23 CDT 2024	MPXV; 2; B_isolate MPX_3U0idu_9000254	197179	OP415224	MPXV_OP415224	Virus_dsDNA_env; Poxviridae; Chordopoxvirinae; Orthopoxvirus; MPXV; 2; B	Monkeypox virus	Linear	OP415224 GBR 2022	West Af	3	2	Europe	GBR	United Kingdom	B	Human	MPX_3U0idu_9000254	2022	Homo sapiens	OP415224
OP415225	Wed Jun 26 18:51:23 CDT 2024	MPXV; 2; B_isolate MPX_vBjMTK_9000255	197207	OP415225	MPXV_OP415225	Virus_dsDNA_env; Poxviridae; Chordopoxvirinae; Orthopoxvirus; MPXV; 2; B	Monkeypox virus	Linear	OP415225 GBR 2022	West Af	3	2	Europe	GBR	United Kingdom	B	Human	MPX_vBjMTK_9000255	2022	Homo sapiens	OP415225
OP415226	Wed Jun 26 18:51:23 CDT 2024	MPXV; 2; B_isolate MPX_k9tr7U_9000256	197202	OP415226	MPXV_OP415226	Virus_dsDNA_env; Poxviridae; Chordopoxvirinae; Orthopoxvirus; MPXV; 2; B	Monkeypox virus	Linear	OP415226 GBR 2022	West Af	3	2	Europe	GBR	United Kingdom	B	Human	MPX_k9tr7U_9000256	2022	Homo sapiens	OP415226
OP415227	Wed Jun 26 18:51:23 CDT 2024	MPXV; 2; B_isolate MPX_1bN2W6_9000258	197181	OP415227	MPXV_OP415227	Virus_dsDNA_env; Poxviridae; Chordopoxvirinae; Orthopoxvirus; MPXV; 2; B	Monkeypox virus	Linear	OP415227 GBR 2022	West Af	3	2	Europe	GBR	United Kingdom	B	Human	MPX_1bN2W6_9000258	2022	Homo sapiens	OP415227
OP415228	Wed Jun 26 18:51:23 CDT 2024	MPXV; 2; B_isolate MPX_UBm6ar_9000259	197205	OP415228	MPXV_OP415228	Virus_dsDNA_env; Poxviridae; Chordopoxvirinae; Orthopoxvirus; MPXV; 2; B	Monkeypox virus	Linear	OP415228 GBR 2022	West Af	3	2	Europe	GBR	United Kingdom	B	Human	MPX_UBm6ar_9000259	2022	Homo sapiens	OP415228
OP415230	Wed Jun 26 18:51:23 CDT 2024	MPXV; 2; B_isolate MPX_dlHLXa_9000261	197207	OP415230	MPXV_OP415230	Virus_dsDNA_env; Poxviridae; Chordopoxvirinae; Orthopoxvirus; MPXV; 2; B	Monkeypox virus	Linear	OP415230 GBR 2022	West Af	3	2	Europe	GBR	United Kingdom	B	Human	MPX_dlHLXa_9000261	2022	Homo sapiens	OP415230
OP415231	Wed Jun 26 18:51:23 CDT 2024	MPXV; 2; B_isolate MPX_8gbW2X_9000262	197179	OP415231	MPXV_OP415231	Virus_dsDNA_env; Poxviridae; Chordopoxvirinae; Orthopoxvirus; MPXV; 2; B	Monkeypox virus	Linear	OP415231 GBR 2022	West Af	3	2	Europe	GBR	United Kingdom	B	Human	MPX_8gbW2X_9000262	2022	Homo sapiens	OP415231
OP415232	Wed Jun 26 18:51:23 CDT 2024	MPXV; 2; B_isolate MPX_AZQnFn_9000263	197179	OP415232	MPXV_OP415232	Virus_dsDNA_env; Poxviridae; Chordopoxvirinae; Orthopoxvirus; MPXV; 2; B	Monkeypox virus	Linear	OP415232 GBR 2022	West Af	3	2	Europe	GBR	United Kingdom	B	Human	MPX_AZQnFn_9000263	2022	Homo sapiens	OP415232
OP415233	Wed Jun 26 18:51:23 CDT 2024	MPXV; 2; B_isolate MPX_qQzToC_9000264	197205	OP415233	MPXV_OP415233	Virus_dsDNA_env; Poxviridae; Chordopoxvirinae; Orthopoxvirus; MPXV; 2; B	Monkeypox virus	Linear	OP415233 GBR 2022	West Af	3	2	Europe	GBR	United Kingdom	B	Human	MPX_qQzToC_9000264	2022	Homo sapiens	OP415233
OP415234	Wed Jun 26 18:51:23 CDT 2024	MPXV; 2; B_isolate MPX_L6rBi6_9000265	197177	OP415234	MPXV_OP415234	Virus_dsDNA_env; Poxviridae; Chordopoxvirinae; Orthopoxvirus; MPXV; 2; B	Monkeypox virus	Linear	OP415234 GBR 2022	West Af	3	2	Europe	GBR	United Kingdom	B	Human	MPX_L6rBi6_9000265	2022	Homo sapiens	OP415234
OP415235	Wed Jun 26 18:51:23 CDT 2024	MPXV; 2; B_isolate MPX_YhLyQX_9000266	197203	OP415235	MPXV_OP415235	Virus_dsDNA_env; Poxviridae; Chordopoxvirinae; Orthopoxvirus; MPXV; 2; B	Monkeypox virus	Linear	OP415235 GBR 2022	West Af	3	2	Europe	GBR	United Kingdom	B	Human	MPX_YhLyQX_9000266	2022	Homo sapiens	OP415235
OP415237	Wed Jun 26 18:51:23 CDT 2024	MPXV; 2; B_isolate MPX_oJ2Z6R_9000271	197205	OP415237	MPXV_OP415237	Virus_dsDNA_env; Poxviridae; Chordopoxvirinae; Orthopoxvirus; MPXV; 2; B	Monkeypox virus	Linear	OP415237 GBR 2022	West Af	3	2	Europe	GBR	United Kingdom	B	Human	MPX_oJ2Z6R_9000271	2022	Homo sapiens	OP415237
OP415238	Wed Jun 26 18:51:23 CDT 2024	MPXV; 2; B_isolate MPX_GGr0lD_9000276	197207	OP415238	MPXV_OP415238	Virus_dsDNA_env; Poxviridae; Chordopoxvirinae; Orthopoxvirus; MPXV; 2; B	Monkeypox virus	Linear	OP415238 GBR 2022	West Af	3	2	Europe	GBR	United Kingdom	B	Human	MPX_GGr0lD_9000276	2022	Homo sapiens	OP415238
OP415239	Wed Jun 26 18:51:23 CDT 2024	MPXV; 2; B_isolate MPX_cAC1lu_9000277	197205	OP415239	MPXV_OP415239	Virus_dsDNA_env; Poxviridae; Chordopoxvirinae; Orthopoxvirus; MPXV; 2; B	Monkeypox virus	Linear	OP415239 GBR 2022	West Af	3	2	Europe	GBR	United Kingdom	B	Human	MPX_cAC1lu_9000277	2022	Homo sapiens	OP415239
OP415240	Wed Jun 26 18:51:23 CDT 2024	MPXV; 2; B_isolate MPX_OSmnPq_9000278	197203	OP415240	MPXV_OP415240	Virus_dsDNA_env; Poxviridae; Chordopoxvirinae; Orthopoxvirus; MPXV; 2; B	Monkeypox virus	Linear	OP415240 GBR 2022	West Af	3	2	Europe	GBR	United Kingdom	B	Human	MPX_OSmnPq_9000278	2022	Homo sapiens	OP415240
OP415241	Wed Jun 26 18:51:23 CDT 2024	MPXV; 2; B_isolate MPX_lBTTWI_9000279	197205	OP415241	MPXV_OP415241	Virus_dsDNA_env; Poxviridae; Chordopoxvirinae; Orthopoxvirus; MPXV; 2; B	Monkeypox virus	Linear	OP415241 GBR 2022	West Af	3	2	Europe	GBR	United Kingdom	B	Human	MPX_lBTTWI_9000279	2022	Homo sapiens	OP415241
OP415242	Wed Jun 26 18:51:23 CDT 2024	MPXV; 2; B_isolate MPX_7f1tnH_9000280	197203	OP415242	MPXV_OP415242	Virus_dsDNA_env; Poxviridae; Chordopoxvirinae; Orthopoxvirus; MPXV; 2; B	Monkeypox virus	Linear	OP415242 GBR 2022	West Af	3	2	Europe	GBR	United Kingdom	B	Human	MPX_7f1tnH_9000280	2022	Homo sapiens	OP415242
OP415243	Wed Jun 26 18:51:23 CDT 2024	MPXV; 2; B_isolate MPX_vSkiJH_9000281	197205	OP415243	MPXV_OP415243	Virus_dsDNA_env; Poxviridae; Chordopoxvirinae; Orthopoxvirus; MPXV; 2; B	Monkeypox virus	Linear	OP415243 GBR 2022	West Af	3	2	Europe	GBR	United Kingdom	B	Human	MPX_vSkiJH_9000281	2022	Homo sapiens	OP415243
OP415244	Wed Jun 26 18:51:23 CDT 2024	MPXV; 2; B_isolate MPX_z0MIuQ_9000282	197203	OP415244	MPXV_OP415244	Virus_dsDNA_env; Poxviridae; Chordopoxvirinae; Orthopoxvirus; MPXV; 2; B	Monkeypox virus	Linear	OP415244 GBR 2022	West Af	3	2	Europe	GBR	United Kingdom	B	Human	MPX_z0MIuQ_9000282	2022	Homo sapiens	OP415244
OP415245	Wed Jun 26 18:51:23 CDT 2024	MPXV; 2; B_isolate MPX_jW1uT9_9000283	197207	OP415245	MPXV_OP415245	Virus_dsDNA_env; Poxviridae; Chordopoxvirinae; Orthopoxvirus; MPXV; 2; B	Monkeypox virus	Linear	OP415245 GBR 2022	West Af	3	2	Europe	GBR	United Kingdom	B	Human	MPX_jW1uT9_9000283	2022	Homo sapiens	OP415245
OP415246	Wed Jun 26 18:51:23 CDT 2024	MPXV; 2; B_isolate MPX_J6xzTO_9000286	197205	OP415246	MPXV_OP415246	Virus_dsDNA_env; Poxviridae; Chordopoxvirinae; Orthopoxvirus; MPXV; 2; B	Monkeypox virus	Linear	OP415246 GBR 2022	West Af	3	2	Europe	GBR	United Kingdom	B	Human	MPX_J6xzTO_9000286	2022	Homo sapiens	OP415246
OP415247	Wed Jun 26 18:51:23 CDT 2024	MPXV; 2; B_isolate MPX_J6xzTO_9000287	197205	OP415247	MPXV_OP415247	Virus_dsDNA_env; Poxviridae; Chordopoxvirinae; Orthopoxvirus; MPXV; 2; B	Monkeypox virus	Linear	OP415247 GBR 2022	West Af	3	2	Europe	GBR	United Kingdom	B	Human	MPX_J6xzTO_9000287	2022	Homo sapiens	OP415247
OP415248	Wed Jun 26 18:51:23 CDT 2024	MPXV; 2; B_isolate MPX_XJRG9b_9000293	197179	OP415248	MPXV_OP415248	Virus_dsDNA_env; Poxviridae; Chordopoxvirinae; Orthopoxvirus; MPXV; 2; B	Monkeypox virus	Linear	OP415248 GBR 2022	West Af	3	2	Europe	GBR	United Kingdom	B	Human	MPX_XJRG9b_9000293	2022	Homo sapiens	OP415248
OP415249	Wed Jun 26 18:51:23 CDT 2024	MPXV; 2; B_isolate MPX_nKUAZz_9000294	197205	OP415249	MPXV_OP415249	Virus_dsDNA_env; Poxviridae; Chordopoxvirinae; Orthopoxvirus; MPXV; 2; B	Monkeypox virus	Linear	OP415249 GBR 2022	West Af	3	2	Europe	GBR	United Kingdom	B	Human	MPX_nKUAZz_9000294	2022	Homo sapiens	OP415249
OP415250	Wed Jun 26 18:51:23 CDT 2024	MPXV; 2; B_isolate MPX_xSF5DR_9000295	197204	OP415250	MPXV_OP415250	Virus_dsDNA_env; Poxviridae; Chordopoxvirinae; Orthopoxvirus; MPXV; 2; B	Monkeypox virus	Linear	OP415250 GBR 2022	West Af	3	2	Europe	GBR	United Kingdom	B	Human	MPX_xSF5DR_9000295	2022	Homo sapiens	OP415250
OP415251	Wed Jun 26 18:51:23 CDT 2024	MPXV; 2; B_isolate MPX_eobXCZ_9000296	197205	OP415251	MPXV_OP415251	Virus_dsDNA_env; Poxviridae; Chordopoxvirinae; Orthopoxvirus; MPXV; 2; B	Monkeypox virus	Linear	OP415251 GBR 2022	West Af	3	2	Europe	GBR	United Kingdom	B	Human	MPX_eobXCZ_9000296	2022	Homo sapiens	OP415251
OP415252	Wed Jun 26 18:51:23 CDT 2024	MPXV; 2; B_isolate MPX_WOcPOH_9000297	197205	OP415252	MPXV_OP415252	Virus_dsDNA_env; Poxviridae; Chordopoxvirinae; Orthopoxvirus; MPXV; 2; B	Monkeypox virus	Linear	OP415252 GBR 2022	West Af	3	2	Europe	GBR	United Kingdom	B	Human	MPX_WOcPOH_9000297	2022	Homo sapiens	OP415252
OP415253	Wed Jun 26 18:51:23 CDT 2024	MPXV; 2; B_isolate MPX_cbQgLw_9000299	197205	OP415253	MPXV_OP415253	Virus_dsDNA_env; Poxviridae; Chordopoxvirinae; Orthopoxvirus; MPXV; 2; B	Monkeypox virus	Linear	OP415253 GBR 2022	West Af	3	2	Europe	GBR	United Kingdom	B	Human	MPX_cbQgLw_9000299	2022	Homo sapiens	OP415253
OP415254	Wed Jun 26 18:51:23 CDT 2024	MPXV; 2; B_isolate MPX_imBNaw_9000300	197205	OP415254	MPXV_OP415254	Virus_dsDNA_env; Poxviridae; Chordopoxvirinae; Orthopoxvirus; MPXV; 2; B	Monkeypox virus	Linear	OP415254 GBR 2022	West Af	3	2	Europe	GBR	United Kingdom	B	Human	MPX_imBNaw_9000300	2022	Homo sapiens	OP415254
OP415255	Wed Jun 26 18:51:23 CDT 2024	MPXV; 2; B_isolate MPX_GZUtx9_9000301	197203	OP415255	MPXV_OP415255	Virus_dsDNA_env; Poxviridae; Chordopoxvirinae; Orthopoxvirus; MPXV; 2; B	Monkeypox virus	Linear	OP415255 GBR 2022	West Af	3	2	Europe	GBR	United Kingdom	B	Human	MPX_GZUtx9_9000301	2022	Homo sapiens	OP415255
OP415256	Wed Jun 26 18:51:23 CDT 2024	MPXV; 2; B_isolate MPX_jTHLhj_9000307	197205	OP415256	MPXV_OP415256	Virus_dsDNA_env; Poxviridae; Chordopoxvirinae; Orthopoxvirus; MPXV; 2; B	Monkeypox virus	Linear	OP415256 GBR 2022	West Af	3	2	Europe	GBR	United Kingdom	B	Human	MPX_jTHLhj_9000307	2022	Homo sapiens	OP415256
OP415257	Wed Jun 26 18:51:23 CDT 2024	MPXV; 2; B_isolate MPX_eunRrC_9000312	197205	OP415257	MPXV_OP415257	Virus_dsDNA_env; Poxviridae; Chordopoxvirinae; Orthopoxvirus; MPXV; 2; B	Monkeypox virus	Linear	OP415257 GBR 2022	West Af	3	2	Europe	GBR	United Kingdom	B	Human	MPX_eunRrC_9000312	2022	Homo sapiens	OP415257
OP415258	Wed Jun 26 18:51:23 CDT 2024	MPXV; 2; B_isolate MPX_XAF7gk_9000317	197194	OP415258	MPXV_OP415258	Virus_dsDNA_env; Poxviridae; Chordopoxvirinae; Orthopoxvirus; MPXV; 2; B	Monkeypox virus	Linear	OP415258 GBR 2022	West Af	3	2	Europe	GBR	United Kingdom	B	Human	MPX_XAF7gk_9000317	2022	Homo sapiens	OP415258
OP415259	Wed Jun 26 18:51:23 CDT 2024	MPXV; 2; B_isolate MPX_VghSe2_9000318	197205	OP415259	MPXV_OP415259	Virus_dsDNA_env; Poxviridae; Chordopoxvirinae; Orthopoxvirus; MPXV; 2; B	Monkeypox virus	Linear	OP415259 GBR 2022	West Af	3	2	Europe	GBR	United Kingdom	B	Human	MPX_VghSe2_9000318	2022	Homo sapiens	OP415259
OP415260	Wed Jun 26 18:51:23 CDT 2024	MPXV; 2; B_isolate MPX_PZ8OdF_9000319	197205	OP415260	MPXV_OP415260	Virus_dsDNA_env; Poxviridae; Chordopoxvirinae; Orthopoxvirus; MPXV; 2; B	Monkeypox virus	Linear	OP415260 GBR 2022	West Af	3	2	Europe	GBR	United Kingdom	B	Human	MPX_PZ8OdF_9000319	2022	Homo sapiens	OP415260
OP415261	Wed Jun 26 18:51:23 CDT 2024	MPXV; 2; B_isolate MPX_1bN2W6_9000321	197205	OP415261	MPXV_OP415261	Virus_dsDNA_env; Poxviridae; Chordopoxvirinae; Orthopoxvirus; MPXV; 2; B	Monkeypox virus	Linear	OP415261 GBR 2022	West Af	3	2	Europe	GBR	United Kingdom	B	Human	MPX_1bN2W6_9000321	2022	Homo sapiens	OP415261
OP415262	Wed Jun 26 18:51:23 CDT 2024	MPXV; 2; B_isolate MPX_Gb1XpC_9000323	197207	OP415262	MPXV_OP415262	Virus_dsDNA_env; Poxviridae; Chordopoxvirinae; Orthopoxvirus; MPXV; 2; B	Monkeypox virus	Linear	OP415262 GBR 2022	West Af	3	2	Europe	GBR	United Kingdom	B	Human	MPX_Gb1XpC_9000323	2022	Homo sapiens	OP415262
OP415263	Wed Jun 26 18:51:23 CDT 2024	MPXV; 2; B_isolate MPX_1bN2W6_9000324	197205	OP415263	MPXV_OP415263	Virus_dsDNA_env; Poxviridae; Chordopoxvirinae; Orthopoxvirus; MPXV; 2; B	Monkeypox virus	Linear	OP415263 GBR 2022	West Af	3	2	Europe	GBR	United Kingdom	B	Human	MPX_1bN2W6_9000324	2022	Homo sapiens	OP415263
OP415264	Wed Jun 26 18:51:23 CDT 2024	MPXV; 2; B_isolate MPX_Tga3e9_9000325	197163	OP415264	MPXV_OP415264	Virus_dsDNA_env; Poxviridae; Chordopoxvirinae; Orthopoxvirus; MPXV; 2; B	Monkeypox virus	Linear	OP415264 GBR 2022	West Af	3	2	Europe	GBR	United Kingdom	B	Human	MPX_Tga3e9_9000325	2022	Homo sapiens	OP415264
OP415265	Wed Jun 26 18:51:23 CDT 2024	MPXV; 2; B_isolate MPX_7eECz2_9000326	197205	OP415265	MPXV_OP415265	Virus_dsDNA_env; Poxviridae; Chordopoxvirinae; Orthopoxvirus; MPXV; 2; B	Monkeypox virus	Linear	OP415265 GBR 2022	West Af	3	2	Europe	GBR	United Kingdom	B	Human	MPX_7eECz2_9000326	2022	Homo sapiens	OP415265
OP415266	Wed Jun 26 18:51:23 CDT 2024	MPXV; 2; B_isolate MPX_ElGfGw_9000328	197208	OP415266	MPXV_OP415266	Virus_dsDNA_env; Poxviridae; Chordopoxvirinae; Orthopoxvirus; MPXV; 2; B	Monkeypox virus	Linear	OP415266 GBR 2022	West Af	3	2	Europe	GBR	United Kingdom	B	Human	MPX_ElGfGw_9000328	2022	Homo sapiens	OP415266
OP415267	Wed Jun 26 18:51:23 CDT 2024	MPXV; 2; B_isolate MPX_rYdyAi_9000329	197205	OP415267	MPXV_OP415267	Virus_dsDNA_env; Poxviridae; Chordopoxvirinae; Orthopoxvirus; MPXV; 2; B	Monkeypox virus	Linear	OP415267 GBR 2022	West Af	3	2	Europe	GBR	United Kingdom	B	Human	MPX_rYdyAi_9000329	2022	Homo sapiens	OP415267
OP415268	Wed Jun 26 18:51:23 CDT 2024	MPXV; 2; B_isolate MPX_Qjmiyl_9000330	197207	OP415268	MPXV_OP415268	Virus_dsDNA_env; Poxviridae; Chordopoxvirinae; Orthopoxvirus; MPXV; 2; B	Monkeypox virus	Linear	OP415268 GBR 2022	West Af	3	2	Europe	GBR	United Kingdom	B	Human	MPX_Qjmiyl_9000330	2022	Homo sapiens	OP415268
OP415269	Wed Jun 26 18:51:23 CDT 2024	MPXV; 2; B_isolate MPX_i0Eo3X_9000331	197205	OP415269	MPXV_OP415269	Virus_dsDNA_env; Poxviridae; Chordopoxvirinae; Orthopoxvirus; MPXV; 2; B	Monkeypox virus	Linear	OP415269 GBR 2022	West Af	3	2	Europe	GBR	United Kingdom	B	Human	MPX_i0Eo3X_9000331	2022	Homo sapiens	OP415269
OP415271	Wed Jun 26 18:51:23 CDT 2024	MPXV; 2; B_isolate MPX_Mfh7qh_9000333	197205	OP415271	MPXV_OP415271	Virus_dsDNA_env; Poxviridae; Chordopoxvirinae; Orthopoxvirus; MPXV; 2; B	Monkeypox virus	Linear	OP415271 GBR 2022	West Af	3	2	Europe	GBR	United Kingdom	B	Human	MPX_Mfh7qh_9000333	2022	Homo sapiens	OP415271
OP415272	Wed Jun 26 18:51:23 CDT 2024	MPXV; 2; B_isolate MPX_bSkpM3_9000334	197205	OP415272	MPXV_OP415272	Virus_dsDNA_env; Poxviridae; Chordopoxvirinae; Orthopoxvirus; MPXV; 2; B	Monkeypox virus	Linear	OP415272 GBR 2022	West Af	3	2	Europe	GBR	United Kingdom	B	Human	MPX_bSkpM3_9000334	2022	Homo sapiens	OP415272
OP415273	Wed Jun 26 18:51:23 CDT 2024	MPXV; 2; B_isolate MPX_L0aaxP_9000335	197205	OP415273	MPXV_OP415273	Virus_dsDNA_env; Poxviridae; Chordopoxvirinae; Orthopoxvirus; MPXV; 2; B	Monkeypox virus	Linear	OP415273 GBR 2022	West Af	3	2	Europe	GBR	United Kingdom	B	Human	MPX_L0aaxP_9000335	2022	Homo sapiens	OP415273
OP415274	Wed Jun 26 18:51:23 CDT 2024	MPXV; 2; B_isolate MPX_i96eY5_9000346	197205	OP415274	MPXV_OP415274	Virus_dsDNA_env; Poxviridae; Chordopoxvirinae; Orthopoxvirus; MPXV; 2; B	Monkeypox virus	Linear	OP415274 GBR 2022	West Af	3	2	Europe	GBR	United Kingdom	B	Human	MPX_i96eY5_9000346	2022	Homo sapiens	OP415274
OP415276	Wed Jun 26 18:51:23 CDT 2024	MPXV; 2; B_isolate MPX_KV9qz9_9000349	197165	OP415276	MPXV_OP415276	Virus_dsDNA_env; Poxviridae; Chordopoxvirinae; Orthopoxvirus; MPXV; 2; B	Monkeypox virus	Linear	OP415276 GBR 2022	West Af	3	2	Europe	GBR	United Kingdom	B	Human	MPX_KV9qz9_9000349	2022	Homo sapiens	OP415276
OP415277	Wed Jun 26 18:51:23 CDT 2024	MPXV; 2; B_isolate MPX_znBYiF_9000350	197205	OP415277	MPXV_OP415277	Virus_dsDNA_env; Poxviridae; Chordopoxvirinae; Orthopoxvirus; MPXV; 2; B	Monkeypox virus	Linear	OP415277 GBR 2022	West Af	3	2	Europe	GBR	United Kingdom	B	Human	MPX_znBYiF_9000350	2022	Homo sapiens	OP415277
OP415278	Wed Jun 26 18:51:23 CDT 2024	MPXV; 2; B_isolate MPX_ev2D41_9000352	197205	OP415278	MPXV_OP415278	Virus_dsDNA_env; Poxviridae; Chordopoxvirinae; Orthopoxvirus; MPXV; 2; B	Monkeypox virus	Linear	OP415278 GBR 2022	West Af	3	2	Europe	GBR	United Kingdom	B	Human	MPX_ev2D41_9000352	2022	Homo sapiens	OP415278
OP415280	Wed Jun 26 18:51:23 CDT 2024	MPXV; 2; B_isolate MPX_3LjZEY_9000355	197205	OP415280	MPXV_OP415280	Virus_dsDNA_env; Poxviridae; Chordopoxvirinae; Orthopoxvirus; MPXV; 2; B	Monkeypox virus	Linear	OP415280 GBR 2022	West Af	3	2	Europe	GBR	United Kingdom	B	Human	MPX_3LjZEY_9000355	2022	Homo sapiens	OP415280
OP415281	Wed Jun 26 18:51:23 CDT 2024	MPXV; 2; B_isolate MPX_hSAaEl_9000356	197205	OP415281	MPXV_OP415281	Virus_dsDNA_env; Poxviridae; Chordopoxvirinae; Orthopoxvirus; MPXV; 2; B	Monkeypox virus	Linear	OP415281 GBR 2022	West Af	3	2	Europe	GBR	United Kingdom	B	Human	MPX_hSAaEl_9000356	2022	Homo sapiens	OP415281
OP415282	Wed Jun 26 18:51:23 CDT 2024	MPXV; 2; B_isolate MPX_yttrq1_9000358	197205	OP415282	MPXV_OP415282	Virus_dsDNA_env; Poxviridae; Chordopoxvirinae; Orthopoxvirus; MPXV; 2; B	Monkeypox virus	Linear	OP415282 GBR 2022	West Af	3	2	Europe	GBR	United Kingdom	B	Human	MPX_yttrq1_9000358	2022	Homo sapiens	OP415282
OP415283	Wed Jun 26 18:51:23 CDT 2024	MPXV; 2; B_isolate MPX_QfgFmq_9000359	197207	OP415283	MPXV_OP415283	Virus_dsDNA_env; Poxviridae; Chordopoxvirinae; Orthopoxvirus; MPXV; 2; B	Monkeypox virus	Linear	OP415283 GBR 2022	West Af	3	2	Europe	GBR	United Kingdom	B	Human	MPX_QfgFmq_9000359	2022	Homo sapiens	OP415283
OP422340	Wed Jun 26 18:51:23 CDT 2024	MPXV; 2; B_isolate MPXV/Austria/MUW1533948/2022	197204	OP422340	MPXV_OP422340	Virus_dsDNA_env; Poxviridae; Chordopoxvirinae; Orthopoxvirus; MPXV; 2; B	Monkeypox virus	Linear	OP422340 AUT 2022	West Af	3	2	Europe	AUT	Austria	B	Human	MPXV/Austria/MUW1533948/2022	2022	Homo sapiens	OP422340
OP422341	Wed Jun 26 18:51:23 CDT 2024	MPXV; 2; B_isolate MPXV/Austria/MUW1538395/2022	197205	OP422341	MPXV_OP422341	Virus_dsDNA_env; Poxviridae; Chordopoxvirinae; Orthopoxvirus; MPXV; 2; B	Monkeypox virus	Linear	OP422341 AUT 2022	West Af	3	2	Europe	AUT	Austria	B	Human	MPXV/Austria/MUW1538395/2022	2022	Homo sapiens	OP422341
OP422342	Wed Jun 26 18:51:23 CDT 2024	MPXV; 2; B_isolate MPXV/Austria/MUW1539124/2022	197204	OP422342	MPXV_OP422342	Virus_dsDNA_env; Poxviridae; Chordopoxvirinae; Orthopoxvirus; MPXV; 2; B	Monkeypox virus	Linear	OP422342 AUT 2022	West Af	3	2	Europe	AUT	Austria	B	Human	MPXV/Austria/MUW1539124/2022	2022	Homo sapiens	OP422342
OP422343	Wed Jun 26 18:51:23 CDT 2024	MPXV; 2; B_isolate MPXV/Austria/MUW1540386/2022	197204	OP422343	MPXV_OP422343	Virus_dsDNA_env; Poxviridae; Chordopoxvirinae; Orthopoxvirus; MPXV; 2; B	Monkeypox virus	Linear	OP422343 AUT 2022	West Af	3	2	Europe	AUT	Austria	B	Human	MPXV/Austria/MUW1540386/2022	2022	Homo sapiens	OP422343
OP431825	Wed Jun 26 18:51:23 CDT 2024	MPXV; 2; B_isolate MPXV22/USA-NE-127	197199	OP431825	MPXV_OP431825	Virus_dsDNA_env; Poxviridae; Chordopoxvirinae; Orthopoxvirus; MPXV; 2; B	Monkeypox virus	Linear	OP431825 USA 2022	West Af	3	2	N America	USA	USA: NE	B	Human	MPXV22/USA-NE-127	2022	Homo sapiens	OP431825
OP431826	Wed Jun 26 18:51:23 CDT 2024	MPXV; 2; B_isolate MPXV22/USA-NE-154	197199	OP431826	MPXV_OP431826	Virus_dsDNA_env; Poxviridae; Chordopoxvirinae; Orthopoxvirus; MPXV; 2; B	Monkeypox virus	Linear	OP431826 USA 2022	West Af	3	2	N America	USA	USA: NE	B	Human	MPXV22/USA-NE-154	2022	Homo sapiens	OP431826
OP431827	Wed Jun 26 18:51:23 CDT 2024	MPXV; 2; B_isolate MPXV22/USA-NE-176	197199	OP431827	MPXV_OP431827	Virus_dsDNA_env; Poxviridae; Chordopoxvirinae; Orthopoxvirus; MPXV; 2; B	Monkeypox virus	Linear	OP431827 USA 2022	West Af	3	2	N America	USA	USA: NE	B	Human	MPXV22/USA-NE-176	2022	Homo sapiens	OP431827
OP431828	Wed Jun 26 18:51:23 CDT 2024	MPXV; 2; B_isolate MPXV22/USA-NE-181	197199	OP431828	MPXV_OP431828	Virus_dsDNA_env; Poxviridae; Chordopoxvirinae; Orthopoxvirus; MPXV; 2; B	Monkeypox virus	Linear	OP431828 USA 2022	West Af	3	2	N America	USA	USA: NE	B	Human	MPXV22/USA-NE-181	2022	Homo sapiens	OP431828
OP431829	Wed Jun 26 18:51:23 CDT 2024	MPXV; 2; B_isolate MPXV22/USA-NE-199	197199	OP431829	MPXV_OP431829	Virus_dsDNA_env; Poxviridae; Chordopoxvirinae; Orthopoxvirus; MPXV; 2; B	Monkeypox virus	Linear	OP431829 USA 2022	West Af	3	2	N America	USA	USA: NE	B	Human	MPXV22/USA-NE-199	2022	Homo sapiens	OP431829
OP434519	Wed Jun 26 18:51:23 CDT 2024	MPXV; 2; B_isolate MPXV/USA/WA-UW-074978/2022	190293	OP434519	MPXV_OP434519	Virus_dsDNA_env; Poxviridae; Chordopoxvirinae; Orthopoxvirus; MPXV; 2; B	Monkeypox virus	Linear	OP434519 USA 2022	West Af	3	2	N America	USA	USA: WA	B	Human	MPXV/USA/WA-UW-074978/2022	2022	Homo sapiens	OP434519
OP442936	Wed Jun 26 18:51:23 CDT 2024	MPXV; 2; B_isolate MPXV/USA/OH-UW-070197/2022	197175	OP442936	MPXV_OP442936	Virus_dsDNA_env; Poxviridae; Chordopoxvirinae; Orthopoxvirus; MPXV; 2; B	Monkeypox virus	Linear	OP442936 USA 2022	West Af	3	2	N America	USA	USA: OH	B	Human	MPXV/USA/OH-UW-070197/2022	2022	Homo sapiens	OP442936
OP442937	Wed Jun 26 18:51:23 CDT 2024	MPXV; 2; B_isolate MPXV/USA/OH-UW-070832/2022	197170	OP442937	MPXV_OP442937	Virus_dsDNA_env; Poxviridae; Chordopoxvirinae; Orthopoxvirus; MPXV; 2; B	Monkeypox virus	Linear	OP442937 USA 2022	West Af	3	2	N America	USA	USA: OH	B	Human	MPXV/USA/OH-UW-070832/2022	2022	Homo sapiens	OP442937
OP442938	Wed Jun 26 18:51:23 CDT 2024	MPXV; 2; B_isolate MPXV/USA/OH-UW-071048/2022	197177	OP442938	MPXV_OP442938	Virus_dsDNA_env; Poxviridae; Chordopoxvirinae; Orthopoxvirus; MPXV; 2; B	Monkeypox virus	Linear	OP442938 USA 2022	West Af	3	2	N America	USA	USA: OH	B	Human	MPXV/USA/OH-UW-071048/2022	2022	Homo sapiens	OP442938
OP442939	Wed Jun 26 18:51:23 CDT 2024	MPXV; 2; B_isolate MPXV/USA/OH-UW-078962/2022	197170	OP442939	MPXV_OP442939	Virus_dsDNA_env; Poxviridae; Chordopoxvirinae; Orthopoxvirus; MPXV; 2; B	Monkeypox virus	Linear	OP442939 USA 2022	West Af	3	2	N America	USA	USA: OH	B	Human	MPXV/USA/OH-UW-078962/2022	2022	Homo sapiens	OP442939
OP442940	Wed Jun 26 18:51:23 CDT 2024	MPXV; 2; B_isolate MPXV/USA/OH-UW-086376/2022	197192	OP442940	MPXV_OP442940	Virus_dsDNA_env; Poxviridae; Chordopoxvirinae; Orthopoxvirus; MPXV; 2; B	Monkeypox virus	Linear	OP442940 USA 2022	West Af	3	2	N America	USA	USA: OH	B	Human	MPXV/USA/OH-UW-086376/2022	2022	Homo sapiens	OP442940
OP442941	Wed Jun 26 18:51:23 CDT 2024	MPXV; 2; B_isolate MPXV/USA/WA-UW-082488/2022	197178	OP442941	MPXV_OP442941	Virus_dsDNA_env; Poxviridae; Chordopoxvirinae; Orthopoxvirus; MPXV; 2; B	Monkeypox virus	Linear	OP442941 USA 2022	West Af	3	2	N America	USA	USA: WA	B	Human	MPXV/USA/WA-UW-082488/2022	2022	Homo sapiens	OP442941
OP442942	Wed Jun 26 18:51:23 CDT 2024	MPXV; 2; B_isolate MPXV/USA/WA-UW-084331/2022	197178	OP442942	MPXV_OP442942	Virus_dsDNA_env; Poxviridae; Chordopoxvirinae; Orthopoxvirus; MPXV; 2; B	Monkeypox virus	Linear	OP442942 USA 2022	West Af	3	2	N America	USA	USA: WA	B	Human	MPXV/USA/WA-UW-084331/2022	2022	Homo sapiens	OP442942
OP442945	Wed Jun 26 18:51:23 CDT 2024	MPXV; 2; B_isolate MPXV/USA/WA-UW-083698/2022	197189	OP442945	MPXV_OP442945	Virus_dsDNA_env; Poxviridae; Chordopoxvirinae; Orthopoxvirus; MPXV; 2; B	Monkeypox virus	Linear	OP442945 USA 2022	West Af	3	2	N America	USA	USA: WA	B	Human	MPXV/USA/WA-UW-083698/2022	2022	Homo sapiens	OP442945
OP442946	Wed Jun 26 18:51:23 CDT 2024	MPXV; 2; B_isolate MPXV/USA/WA-UW-085393/2022	197190	OP442946	MPXV_OP442946	Virus_dsDNA_env; Poxviridae; Chordopoxvirinae; Orthopoxvirus; MPXV; 2; B	Monkeypox virus	Linear	OP442946 USA 2022	West Af	3	2	N America	USA	USA: WA	B	Human	MPXV/USA/WA-UW-085393/2022	2022	Homo sapiens	OP442946
OP442947	Wed Jun 26 18:51:23 CDT 2024	MPXV; 2; B_isolate MPXV/USA/WA-UW-088793/2022	197186	OP442947	MPXV_OP442947	Virus_dsDNA_env; Poxviridae; Chordopoxvirinae; Orthopoxvirus; MPXV; 2; B	Monkeypox virus	Linear	OP442947 USA 2022	West Af	3	2	N America	USA	USA: WA	B	Human	MPXV/USA/WA-UW-088793/2022	2022	Homo sapiens	OP442947
OP459202	Wed Jun 26 18:51:23 CDT 2024	MPXV; 2; B_isolate MPXV_USA_2022_GA0005	197224	OP459202	MPXV_OP459202	Virus_dsDNA_env; Poxviridae; Chordopoxvirinae; Orthopoxvirus; MPXV; 2; B	Monkeypox virus	Linear	OP459202 USA 2022	West Af	3	2	N America	USA	USA: GA	B	Human	MPXV_USA_2022_GA0005	2022	Homo sapiens	OP459202
OP480404	Wed Jun 26 18:51:23 CDT 2024	MPXV; 2; B_isolate MPXV/USA/NC-UNC-0003/2022	197200	OP480404	MPXV_OP480404	Virus_dsDNA_env; Poxviridae; Chordopoxvirinae; Orthopoxvirus; MPXV; 2; B	Monkeypox virus	Linear	OP480404 USA 2022	West Af	3	2	N America	USA	USA: NC	B	Human	MPXV/USA/NC-UNC-0003/2022	2022	Homo sapiens	OP480404
OP484340	Wed Jun 26 18:51:23 CDT 2024	MPXV; 2; B_isolate MPXV22/USA-OK-104	197199	OP484340	MPXV_OP484340	Virus_dsDNA_env; Poxviridae; Chordopoxvirinae; Orthopoxvirus; MPXV; 2; B	Monkeypox virus	Linear	OP484340 USA 2022	West Af	3	2	N America	USA	USA: OK	B	Human	MPXV22/USA-OK-104	2022	Homo sapiens	OP484340
OP484341	Wed Jun 26 18:51:23 CDT 2024	MPXV; 2; B_isolate MPXV22/USA-OK-180	197202	OP484341	MPXV_OP484341	Virus_dsDNA_env; Poxviridae; Chordopoxvirinae; Orthopoxvirus; MPXV; 2; B	Monkeypox virus	Linear	OP484341 USA 2022	West Af	3	2	N America	USA	USA: OK	B	Human	MPXV22/USA-OK-180	2022	Homo sapiens	OP484341
OP484663	Wed Jun 26 18:51:23 CDT 2024	MPXV; 2; B_isolate MPXV/Germany/2022/RKI340	197139	OP484663	MPXV_OP484663	Virus_dsDNA_env; Poxviridae; Chordopoxvirinae; Orthopoxvirus; MPXV; 2; B	Monkeypox virus	Linear	OP484663 DEU 2022	West Af	3	2	Europe	DEU	Germany	B	Human	MPXV/Germany/2022/RKI340	2022	Homo sapiens	OP484663
OP484666	Wed Jun 26 18:51:23 CDT 2024	MPXV; 2; B_isolate MPXV/Germany/2022/RKI345	197139	OP484666	MPXV_OP484666	Virus_dsDNA_env; Poxviridae; Chordopoxvirinae; Orthopoxvirus; MPXV; 2; B	Monkeypox virus	Linear	OP484666 DEU 2022	West Af	3	2	Europe	DEU	Germany	B	Human	MPXV/Germany/2022/RKI345	2022	Homo sapiens	OP484666
OP484667	Wed Jun 26 18:51:23 CDT 2024	MPXV; 2; B_isolate MPXV/Germany/2022/RKI346	197139	OP484667	MPXV_OP484667	Virus_dsDNA_env; Poxviridae; Chordopoxvirinae; Orthopoxvirus; MPXV; 2; B	Monkeypox virus	Linear	OP484667 DEU 2022	West Af	3	2	Europe	DEU	Germany	B	Human	MPXV/Germany/2022/RKI346	2022	Homo sapiens	OP484667
OP484668	Wed Jun 26 18:51:23 CDT 2024	MPXV; 2; B_isolate MPXV/Germany/2022/RKI347	197139	OP484668	MPXV_OP484668	Virus_dsDNA_env; Poxviridae; Chordopoxvirinae; Orthopoxvirus; MPXV; 2; B	Monkeypox virus	Linear	OP484668 DEU 2022	West Af	3	2	Europe	DEU	Germany	B	Human	MPXV/Germany/2022/RKI347	2022	Homo sapiens	OP484668
OP484669	Wed Jun 26 18:51:23 CDT 2024	MPXV; 2; B_isolate MPXV/Germany/2022/RKI348	197140	OP484669	MPXV_OP484669	Virus_dsDNA_env; Poxviridae; Chordopoxvirinae; Orthopoxvirus; MPXV; 2; B	Monkeypox virus	Linear	OP484669 DEU 2022	West Af	3	2	Europe	DEU	Germany	B	Human	MPXV/Germany/2022/RKI348	2022	Homo sapiens	OP484669
OP484670	Wed Jun 26 18:51:23 CDT 2024	MPXV; 2; B_isolate MPXV/Germany/2022/RKI349	197139	OP484670	MPXV_OP484670	Virus_dsDNA_env; Poxviridae; Chordopoxvirinae; Orthopoxvirus; MPXV; 2; B	Monkeypox virus	Linear	OP484670 DEU 2022	West Af	3	2	Europe	DEU	Germany	B	Human	MPXV/Germany/2022/RKI349	2022	Homo sapiens	OP484670
OP484671	Wed Jun 26 18:51:23 CDT 2024	MPXV; 2; B_isolate MPXV/Germany/2022/RKI350	197139	OP484671	MPXV_OP484671	Virus_dsDNA_env; Poxviridae; Chordopoxvirinae; Orthopoxvirus; MPXV; 2; B	Monkeypox virus	Linear	OP484671 DEU 2022	West Af	3	2	Europe	DEU	Germany	B	Human	MPXV/Germany/2022/RKI350	2022	Homo sapiens	OP484671
OP484672	Wed Jun 26 18:51:23 CDT 2024	MPXV; 2; B_isolate MPXV/Germany/2022/RKI351	197140	OP484672	MPXV_OP484672	Virus_dsDNA_env; Poxviridae; Chordopoxvirinae; Orthopoxvirus; MPXV; 2; B	Monkeypox virus	Linear	OP484672 DEU 2022	West Af	3	2	Europe	DEU	Germany	B	Human	MPXV/Germany/2022/RKI351	2022	Homo sapiens	OP484672
OP484673	Wed Jun 26 18:51:23 CDT 2024	MPXV; 2; B_isolate MPXV/Germany/2022/RKI352	196226	OP484673	MPXV_OP484673	Virus_dsDNA_env; Poxviridae; Chordopoxvirinae; Orthopoxvirus; MPXV; 2; B	Monkeypox virus	Linear	OP484673 DEU 2022	West Af	3	2	Europe	DEU	Germany	B	Human	MPXV/Germany/2022/RKI352	2022	Homo sapiens	OP484673
OP484674	Wed Jun 26 18:51:23 CDT 2024	MPXV; 2; B_isolate MPXV/Germany/2022/RKI353	197139	OP484674	MPXV_OP484674	Virus_dsDNA_env; Poxviridae; Chordopoxvirinae; Orthopoxvirus; MPXV; 2; B	Monkeypox virus	Linear	OP484674 DEU 2022	West Af	3	2	Europe	DEU	Germany	B	Human	MPXV/Germany/2022/RKI353	2022	Homo sapiens	OP484674
OP484675	Wed Jun 26 18:51:23 CDT 2024	MPXV; 2; B_isolate MPXV/Germany/2022/RKI354	197139	OP484675	MPXV_OP484675	Virus_dsDNA_env; Poxviridae; Chordopoxvirinae; Orthopoxvirus; MPXV; 2; B	Monkeypox virus	Linear	OP484675 DEU 2022	West Af	3	2	Europe	DEU	Germany	B	Human	MPXV/Germany/2022/RKI354	2022	Homo sapiens	OP484675
OP484676	Wed Jun 26 18:51:23 CDT 2024	MPXV; 2; B_isolate MPXV/Germany/2022/RKI355	197173	OP484676	MPXV_OP484676	Virus_dsDNA_env; Poxviridae; Chordopoxvirinae; Orthopoxvirus; MPXV; 2; B	Monkeypox virus	Linear	OP484676 DEU 2022	West Af	3	2	Europe	DEU	Germany	B	Human	MPXV/Germany/2022/RKI355	2022	Homo sapiens	OP484676
OP484677	Wed Jun 26 18:51:23 CDT 2024	MPXV; 2; B_isolate MPXV/Germany/2022/RKI356	197140	OP484677	MPXV_OP484677	Virus_dsDNA_env; Poxviridae; Chordopoxvirinae; Orthopoxvirus; MPXV; 2; B	Monkeypox virus	Linear	OP484677 DEU 2022	West Af	3	2	Europe	DEU	Germany	B	Human	MPXV/Germany/2022/RKI356	2022	Homo sapiens	OP484677
OP484678	Wed Jun 26 18:51:23 CDT 2024	MPXV; 2; B_isolate MPXV/Germany/2022/RKI357	197140	OP484678	MPXV_OP484678	Virus_dsDNA_env; Poxviridae; Chordopoxvirinae; Orthopoxvirus; MPXV; 2; B	Monkeypox virus	Linear	OP484678 DEU 2022	West Af	3	2	Europe	DEU	Germany	B	Human	MPXV/Germany/2022/RKI357	2022	Homo sapiens	OP484678
OP484679	Wed Jun 26 18:51:23 CDT 2024	MPXV; 2; B_isolate MPXV/Germany/2022/RKI358	197140	OP484679	MPXV_OP484679	Virus_dsDNA_env; Poxviridae; Chordopoxvirinae; Orthopoxvirus; MPXV; 2; B	Monkeypox virus	Linear	OP484679 DEU 2022	West Af	3	2	Europe	DEU	Germany	B	Human	MPXV/Germany/2022/RKI358	2022	Homo sapiens	OP484679
OP484680	Wed Jun 26 18:51:23 CDT 2024	MPXV; 2; B_isolate MPXV/Germany/2022/RKI359	197139	OP484680	MPXV_OP484680	Virus_dsDNA_env; Poxviridae; Chordopoxvirinae; Orthopoxvirus; MPXV; 2; B	Monkeypox virus	Linear	OP484680 DEU 2022	West Af	3	2	Europe	DEU	Germany	B	Human	MPXV/Germany/2022/RKI359	2022	Homo sapiens	OP484680
OP484681	Wed Jun 26 18:51:23 CDT 2024	MPXV; 2; B_isolate MPXV/Germany/2022/RKI360	197139	OP484681	MPXV_OP484681	Virus_dsDNA_env; Poxviridae; Chordopoxvirinae; Orthopoxvirus; MPXV; 2; B	Monkeypox virus	Linear	OP484681 DEU 2022	West Af	3	2	Europe	DEU	Germany	B	Human	MPXV/Germany/2022/RKI360	2022	Homo sapiens	OP484681
OP484682	Wed Jun 26 18:51:23 CDT 2024	MPXV; 2; B_isolate MPXV/Germany/2022/RKI361	197139	OP484682	MPXV_OP484682	Virus_dsDNA_env; Poxviridae; Chordopoxvirinae; Orthopoxvirus; MPXV; 2; B	Monkeypox virus	Linear	OP484682 DEU 2022	West Af	3	2	Europe	DEU	Germany	B	Human	MPXV/Germany/2022/RKI361	2022	Homo sapiens	OP484682
OP484683	Wed Jun 26 18:51:23 CDT 2024	MPXV; 2; B_isolate MPXV/Germany/2022/RKI362	197140	OP484683	MPXV_OP484683	Virus_dsDNA_env; Poxviridae; Chordopoxvirinae; Orthopoxvirus; MPXV; 2; B	Monkeypox virus	Linear	OP484683 DEU 2022	West Af	3	2	Europe	DEU	Germany	B	Human	MPXV/Germany/2022/RKI362	2022	Homo sapiens	OP484683
OP484684	Wed Jun 26 18:51:23 CDT 2024	MPXV; 2; B_isolate MPXV/Germany/2022/RKI363	197139	OP484684	MPXV_OP484684	Virus_dsDNA_env; Poxviridae; Chordopoxvirinae; Orthopoxvirus; MPXV; 2; B	Monkeypox virus	Linear	OP484684 DEU 2022	West Af	3	2	Europe	DEU	Germany	B	Human	MPXV/Germany/2022/RKI363	2022	Homo sapiens	OP484684
OP484687	Wed Jun 26 18:51:23 CDT 2024	MPXV; 2; B_isolate MPXV/Germany/2022/RKI366	197139	OP484687	MPXV_OP484687	Virus_dsDNA_env; Poxviridae; Chordopoxvirinae; Orthopoxvirus; MPXV; 2; B	Monkeypox virus	Linear	OP484687 DEU 2022	West Af	3	2	Europe	DEU	Germany	B	Human	MPXV/Germany/2022/RKI366	2022	Homo sapiens	OP484687
OP484691	Wed Jun 26 18:51:23 CDT 2024	MPXV; 2; B_isolate MPXV/Germany/2022/RKI370	197140	OP484691	MPXV_OP484691	Virus_dsDNA_env; Poxviridae; Chordopoxvirinae; Orthopoxvirus; MPXV; 2; B	Monkeypox virus	Linear	OP484691 DEU 2022	West Af	3	2	Europe	DEU	Germany	B	Human	MPXV/Germany/2022/RKI370	2022	Homo sapiens	OP484691
OP484694	Wed Jun 26 18:51:23 CDT 2024	MPXV; 2; B_isolate MPXV/Germany/2022/RKI373	197139	OP484694	MPXV_OP484694	Virus_dsDNA_env; Poxviridae; Chordopoxvirinae; Orthopoxvirus; MPXV; 2; B	Monkeypox virus	Linear	OP484694 DEU 2022	West Af	3	2	Europe	DEU	Germany	B	Human	MPXV/Germany/2022/RKI373	2022	Homo sapiens	OP484694
OP484695	Wed Jun 26 18:51:23 CDT 2024	MPXV; 2; B_isolate MPXV/Germany/2022/RKI342	197139	OP484695	MPXV_OP484695	Virus_dsDNA_env; Poxviridae; Chordopoxvirinae; Orthopoxvirus; MPXV; 2; B	Monkeypox virus	Linear	OP484695 DEU 2022	West Af	3	2	Europe	DEU	Germany	B	Human	MPXV/Germany/2022/RKI342	2022	Homo sapiens	OP484695
OP484696	Wed Jun 26 18:51:23 CDT 2024	MPXV; 2; B_isolate MPXV/Germany/2022/RKI344	197139	OP484696	MPXV_OP484696	Virus_dsDNA_env; Poxviridae; Chordopoxvirinae; Orthopoxvirus; MPXV; 2; B	Monkeypox virus	Linear	OP484696 DEU 2022	West Af	3	2	Europe	DEU	Germany	B	Human	MPXV/Germany/2022/RKI344	2022	Homo sapiens	OP484696
OP523979	Wed Jun 26 18:51:23 CDT 2024	MPXV; 2; B_isolate MPXV/Germany/2022/RKI377	197171	OP523979	MPXV_OP523979	Virus_dsDNA_env; Poxviridae; Chordopoxvirinae; Orthopoxvirus; MPXV; 2; B	Monkeypox virus	Linear	OP523979 DEU 2022	West Af	3	2	Europe	DEU	Germany	B	Human	MPXV/Germany/2022/RKI377	2022	Homo sapiens	OP523979
OP523980	Wed Jun 26 18:51:23 CDT 2024	MPXV; 2; B_isolate MPXV/Germany/2022/RKI378	197139	OP523980	MPXV_OP523980	Virus_dsDNA_env; Poxviridae; Chordopoxvirinae; Orthopoxvirus; MPXV; 2; B	Monkeypox virus	Linear	OP523980 DEU 2022	West Af	3	2	Europe	DEU	Germany	B	Human	MPXV/Germany/2022/RKI378	2022	Homo sapiens	OP523980
OP523981	Wed Jun 26 18:51:23 CDT 2024	MPXV; 2; B_isolate MPXV/Germany/2022/RKI379	197140	OP523981	MPXV_OP523981	Virus_dsDNA_env; Poxviridae; Chordopoxvirinae; Orthopoxvirus; MPXV; 2; B	Monkeypox virus	Linear	OP523981 DEU 2022	West Af	3	2	Europe	DEU	Germany	B	Human	MPXV/Germany/2022/RKI379	2022	Homo sapiens	OP523981
OP523982	Wed Jun 26 18:51:23 CDT 2024	MPXV; 2; B_isolate MPXV/Germany/2022/RKI380	197139	OP523982	MPXV_OP523982	Virus_dsDNA_env; Poxviridae; Chordopoxvirinae; Orthopoxvirus; MPXV; 2; B	Monkeypox virus	Linear	OP523982 DEU 2022	West Af	3	2	Europe	DEU	Germany	B	Human	MPXV/Germany/2022/RKI380	2022	Homo sapiens	OP523982
OP523983	Wed Jun 26 18:51:23 CDT 2024	MPXV; 2; B_isolate MPXV/Germany/2022/RKI381	197142	OP523983	MPXV_OP523983	Virus_dsDNA_env; Poxviridae; Chordopoxvirinae; Orthopoxvirus; MPXV; 2; B	Monkeypox virus	Linear	OP523983 DEU 2022	West Af	3	2	Europe	DEU	Germany	B	Human	MPXV/Germany/2022/RKI381	2022	Homo sapiens	OP523983
OP523984	Wed Jun 26 18:51:23 CDT 2024	MPXV; 2; B_isolate MPXV/Germany/2022/RKI382	196227	OP523984	MPXV_OP523984	Virus_dsDNA_env; Poxviridae; Chordopoxvirinae; Orthopoxvirus; MPXV; 2; B	Monkeypox virus	Linear	OP523984 DEU 2022	West Af	3	2	Europe	DEU	Germany	B	Human	MPXV/Germany/2022/RKI382	2022	Homo sapiens	OP523984
OP523986	Wed Jun 26 18:51:23 CDT 2024	MPXV; 2; B_isolate MPXV/Germany/2022/RKI384	197140	OP523986	MPXV_OP523986	Virus_dsDNA_env; Poxviridae; Chordopoxvirinae; Orthopoxvirus; MPXV; 2; B	Monkeypox virus	Linear	OP523986 DEU 2022	West Af	3	2	Europe	DEU	Germany	B	Human	MPXV/Germany/2022/RKI384	2022	Homo sapiens	OP523986
OP523987	Wed Jun 26 18:51:23 CDT 2024	MPXV; 2; B_isolate MPXV/Germany/2022/RKI385	197140	OP523987	MPXV_OP523987	Virus_dsDNA_env; Poxviridae; Chordopoxvirinae; Orthopoxvirus; MPXV; 2; B	Monkeypox virus	Linear	OP523987 DEU 2022	West Af	3	2	Europe	DEU	Germany	B	Human	MPXV/Germany/2022/RKI385	2022	Homo sapiens	OP523987
OP523988	Wed Jun 26 18:51:23 CDT 2024	MPXV; 2; B_isolate MPXV/Germany/2022/RKI386	197139	OP523988	MPXV_OP523988	Virus_dsDNA_env; Poxviridae; Chordopoxvirinae; Orthopoxvirus; MPXV; 2; B	Monkeypox virus	Linear	OP523988 DEU 2022	West Af	3	2	Europe	DEU	Germany	B	Human	MPXV/Germany/2022/RKI386	2022	Homo sapiens	OP523988
OP523989	Wed Jun 26 18:51:23 CDT 2024	MPXV; 2; B_isolate MPXV/Germany/2022/RKI387	197140	OP523989	MPXV_OP523989	Virus_dsDNA_env; Poxviridae; Chordopoxvirinae; Orthopoxvirus; MPXV; 2; B	Monkeypox virus	Linear	OP523989 DEU 2022	West Af	3	2	Europe	DEU	Germany	B	Human	MPXV/Germany/2022/RKI387	2022	Homo sapiens	OP523989
OP523990	Wed Jun 26 18:51:23 CDT 2024	MPXV; 2; B_isolate MPXV/Germany/2022/RKI388	197139	OP523990	MPXV_OP523990	Virus_dsDNA_env; Poxviridae; Chordopoxvirinae; Orthopoxvirus; MPXV; 2; B	Monkeypox virus	Linear	OP523990 DEU 2022	West Af	3	2	Europe	DEU	Germany	B	Human	MPXV/Germany/2022/RKI388	2022	Homo sapiens	OP523990
OP523992	Wed Jun 26 18:51:23 CDT 2024	MPXV; 2; B_isolate MPXV/Germany/2022/RKI390	197139	OP523992	MPXV_OP523992	Virus_dsDNA_env; Poxviridae; Chordopoxvirinae; Orthopoxvirus; MPXV; 2; B	Monkeypox virus	Linear	OP523992 DEU 2022	West Af	3	2	Europe	DEU	Germany	B	Human	MPXV/Germany/2022/RKI390	2022	Homo sapiens	OP523992
OP523993	Wed Jun 26 18:51:23 CDT 2024	MPXV; 2; B_isolate MPXV/Germany/2022/RKI391	197139	OP523993	MPXV_OP523993	Virus_dsDNA_env; Poxviridae; Chordopoxvirinae; Orthopoxvirus; MPXV; 2; B	Monkeypox virus	Linear	OP523993 DEU 2022	West Af	3	2	Europe	DEU	Germany	B	Human	MPXV/Germany/2022/RKI391	2022	Homo sapiens	OP523993
OP523994	Wed Jun 26 18:51:23 CDT 2024	MPXV; 2; B_isolate MPXV/Germany/2022/RKI392	197140	OP523994	MPXV_OP523994	Virus_dsDNA_env; Poxviridae; Chordopoxvirinae; Orthopoxvirus; MPXV; 2; B	Monkeypox virus	Linear	OP523994 DEU 2022	West Af	3	2	Europe	DEU	Germany	B	Human	MPXV/Germany/2022/RKI392	2022	Homo sapiens	OP523994
OP523995	Wed Jun 26 18:51:23 CDT 2024	MPXV; 2; B_isolate MPXV/Germany/2022/RKI393	197140	OP523995	MPXV_OP523995	Virus_dsDNA_env; Poxviridae; Chordopoxvirinae; Orthopoxvirus; MPXV; 2; B	Monkeypox virus	Linear	OP523995 DEU 2022	West Af	3	2	Europe	DEU	Germany	B	Human	MPXV/Germany/2022/RKI393	2022	Homo sapiens	OP523995
OP523997	Wed Jun 26 18:51:23 CDT 2024	MPXV; 2; B_isolate MPXV/Germany/2022/RKI394	197139	OP523997	MPXV_OP523997	Virus_dsDNA_env; Poxviridae; Chordopoxvirinae; Orthopoxvirus; MPXV; 2; B	Monkeypox virus	Linear	OP523997 DEU 2022	West Af	3	2	Europe	DEU	Germany	B	Human	MPXV/Germany/2022/RKI394	2022	Homo sapiens	OP523997
OP523998	Wed Jun 26 18:51:23 CDT 2024	MPXV; 2; B_isolate MPXV/Germany/2022/RKI395	197140	OP523998	MPXV_OP523998	Virus_dsDNA_env; Poxviridae; Chordopoxvirinae; Orthopoxvirus; MPXV; 2; B	Monkeypox virus	Linear	OP523998 DEU 2022	West Af	3	2	Europe	DEU	Germany	B	Human	MPXV/Germany/2022/RKI395	2022	Homo sapiens	OP523998
OP523999	Wed Jun 26 18:51:23 CDT 2024	MPXV; 2; B_isolate MPXV/Germany/2022/RKI396	197137	OP523999	MPXV_OP523999	Virus_dsDNA_env; Poxviridae; Chordopoxvirinae; Orthopoxvirus; MPXV; 2; B	Monkeypox virus	Linear	OP523999 DEU 2022	West Af	3	2	Europe	DEU	Germany	B	Human	MPXV/Germany/2022/RKI396	2022	Homo sapiens	OP523999
OP524001	Wed Jun 26 18:51:23 CDT 2024	MPXV; 2; B_isolate MPXV/Germany/2022/RKI399	197143	OP524001	MPXV_OP524001	Virus_dsDNA_env; Poxviridae; Chordopoxvirinae; Orthopoxvirus; MPXV; 2; B	Monkeypox virus	Linear	OP524001 DEU 2022	West Af	3	2	Europe	DEU	Germany	B	Human	MPXV/Germany/2022/RKI399	2022	Homo sapiens	OP524001
OP524003	Wed Jun 26 18:51:23 CDT 2024	MPXV; 2; B_isolate MPXV/Germany/2022/RKI402	197139	OP524003	MPXV_OP524003	Virus_dsDNA_env; Poxviridae; Chordopoxvirinae; Orthopoxvirus; MPXV; 2; B	Monkeypox virus	Linear	OP524003 DEU 2022	West Af	3	2	Europe	DEU	Germany	B	Human	MPXV/Germany/2022/RKI402	2022	Homo sapiens	OP524003
OP524004	Wed Jun 26 18:51:23 CDT 2024	MPXV; 2; B_isolate MPXV/Germany/2022/RKI403	197139	OP524004	MPXV_OP524004	Virus_dsDNA_env; Poxviridae; Chordopoxvirinae; Orthopoxvirus; MPXV; 2; B	Monkeypox virus	Linear	OP524004 DEU 2022	West Af	3	2	Europe	DEU	Germany	B	Human	MPXV/Germany/2022/RKI403	2022	Homo sapiens	OP524004
OP524007	Wed Jun 26 18:51:23 CDT 2024	MPXV; 2; B_isolate MPXV/Germany/2022/RKI405	197139	OP524007	MPXV_OP524007	Virus_dsDNA_env; Poxviridae; Chordopoxvirinae; Orthopoxvirus; MPXV; 2; B	Monkeypox virus	Linear	OP524007 DEU 2022	West Af	3	2	Europe	DEU	Germany	B	Human	MPXV/Germany/2022/RKI405	2022	Homo sapiens	OP524007
OP524008	Wed Jun 26 18:51:23 CDT 2024	MPXV; 2; B_isolate MPXV/Germany/2022/RKI406	197140	OP524008	MPXV_OP524008	Virus_dsDNA_env; Poxviridae; Chordopoxvirinae; Orthopoxvirus; MPXV; 2; B	Monkeypox virus	Linear	OP524008 DEU 2022	West Af	3	2	Europe	DEU	Germany	B	Human	MPXV/Germany/2022/RKI406	2022	Homo sapiens	OP524008
OP524009	Wed Jun 26 18:51:23 CDT 2024	MPXV; 2; B_isolate MPXV/Germany/2022/RKI407	197139	OP524009	MPXV_OP524009	Virus_dsDNA_env; Poxviridae; Chordopoxvirinae; Orthopoxvirus; MPXV; 2; B	Monkeypox virus	Linear	OP524009 DEU 2022	West Af	3	2	Europe	DEU	Germany	B	Human	MPXV/Germany/2022/RKI407	2022	Homo sapiens	OP524009
OP524010	Wed Jun 26 18:51:23 CDT 2024	MPXV; 2; B_isolate MPXV/Germany/2022/RKI408	197139	OP524010	MPXV_OP524010	Virus_dsDNA_env; Poxviridae; Chordopoxvirinae; Orthopoxvirus; MPXV; 2; B	Monkeypox virus	Linear	OP524010 DEU 2022	West Af	3	2	Europe	DEU	Germany	B	Human	MPXV/Germany/2022/RKI408	2022	Homo sapiens	OP524010
OP524011	Wed Jun 26 18:51:23 CDT 2024	MPXV; 2; B_isolate MPXV/Germany/2022/RKI409	197140	OP524011	MPXV_OP524011	Virus_dsDNA_env; Poxviridae; Chordopoxvirinae; Orthopoxvirus; MPXV; 2; B	Monkeypox virus	Linear	OP524011 DEU 2022	West Af	3	2	Europe	DEU	Germany	B	Human	MPXV/Germany/2022/RKI409	2022	Homo sapiens	OP524011
OP524012	Wed Jun 26 18:51:23 CDT 2024	MPXV; 2; B_isolate MPXV/Germany/2022/RKI410	197139	OP524012	MPXV_OP524012	Virus_dsDNA_env; Poxviridae; Chordopoxvirinae; Orthopoxvirus; MPXV; 2; B	Monkeypox virus	Linear	OP524012 DEU 2022	West Af	3	2	Europe	DEU	Germany	B	Human	MPXV/Germany/2022/RKI410	2022	Homo sapiens	OP524012
OP526855	Wed Jun 26 18:51:23 CDT 2024	MPXV; 2; B_isolate MPXV_USA_2022_NY0493	195951	OP526855	MPXV_OP526855	Virus_dsDNA_env; Poxviridae; Chordopoxvirinae; Orthopoxvirus; MPXV; 2; B	Monkeypox virus	Linear	OP526855 USA 2022	West Af	3	2	N America	USA	USA: NY	B	Human	MPXV_USA_2022_NY0493	2022	Homo sapiens	OP526855
OP526856	Wed Jun 26 18:51:23 CDT 2024	MPXV; 2; B_isolate MPXV_USA_2022_MN0001	205032	OP526856	MPXV_OP526856	Virus_dsDNA_env; Poxviridae; Chordopoxvirinae; Orthopoxvirus; MPXV; 2; B	Monkeypox virus	Linear	OP526856 USA 2022	West Af	3	2	N America	USA	USA: MN	B	Human	MPXV_USA_2022_MN0001	2022	Homo sapiens	OP526856
OP526857	Wed Jun 26 18:51:23 CDT 2024	MPXV; 2; B_isolate MPXV_USA_2022_FL0052	183230	OP526857	MPXV_OP526857	Virus_dsDNA_env; Poxviridae; Chordopoxvirinae; Orthopoxvirus; MPXV; 2; B	Monkeypox virus	Linear	OP526857 USA 2022	West Af	3	2	N America	USA	USA: FL	B	Human	MPXV_USA_2022_FL0052	2022	Homo sapiens	OP526857
OP526858	Wed Jun 26 18:51:23 CDT 2024	MPXV; 2; B_isolate MPXV_USA_2022_FL0065	200014	OP526858	MPXV_OP526858	Virus_dsDNA_env; Poxviridae; Chordopoxvirinae; Orthopoxvirus; MPXV; 2; B	Monkeypox virus	Linear	OP526858 USA 2022	West Af	3	2	N America	USA	USA: FL	B	Human	MPXV_USA_2022_FL0065	2022	Homo sapiens	OP526858
OP526859	Wed Jun 26 18:51:23 CDT 2024	MPXV; 2; B_isolate MPXV_USA_2022_MD0005	195410	OP526859	MPXV_OP526859	Virus_dsDNA_env; Poxviridae; Chordopoxvirinae; Orthopoxvirus; MPXV; 2; B	Monkeypox virus	Linear	OP526859 USA 2022	West Af	3	2	N America	USA	USA: MD	B	Human	MPXV_USA_2022_MD0005	2022	Homo sapiens	OP526859
OP526860	Wed Jun 26 18:51:23 CDT 2024	MPXV; 2; B_isolate MPXV_USA_2022_RI0001	206803	OP526860	MPXV_OP526860	Virus_dsDNA_env; Poxviridae; Chordopoxvirinae; Orthopoxvirus; MPXV; 2; B	Monkeypox virus	Linear	OP526860 USA 2022	West Af	3	2	N America	USA	USA: RI	B	Human	MPXV_USA_2022_RI0001	2022	Homo sapiens	OP526860
OP526861	Wed Jun 26 18:51:23 CDT 2024	MPXV; 2; B_isolate MPXV_USA_2022_FL0019	210919	OP526861	MPXV_OP526861	Virus_dsDNA_env; Poxviridae; Chordopoxvirinae; Orthopoxvirus; MPXV; 2; B	Monkeypox virus	Linear	OP526861 USA 2022	West Af	3	2	N America	USA	USA: FL	B	Human	MPXV_USA_2022_FL0019	2022	Homo sapiens	OP526861
OP526862	Wed Jun 26 18:51:23 CDT 2024	MPXV; 2; B_isolate MPXV_USA_2022_DC0013	195412	OP526862	MPXV_OP526862	Virus_dsDNA_env; Poxviridae; Chordopoxvirinae; Orthopoxvirus; MPXV; 2; B	Monkeypox virus	Linear	OP526862 USA 2022	West Af	3	2	N America	USA	USA: DC	B	Human	MPXV_USA_2022_DC0013	2022	Homo sapiens	OP526862
OP535312	Wed Jun 26 18:51:23 CDT 2024	MPXV; 2; B_isolate MPXV_Nigeria_2018_5222	197547	OP535312	MPXV_OP535312	Virus_dsDNA_env; Poxviridae; Chordopoxvirinae; Orthopoxvirus; MPXV; 2; B	Monkeypox virus	Linear	OP535312 NGA 2018	West Af	2	2	W Africa	NGA	Nigeria: Rivers	B	Human	MPXV_Nigeria_2018_5222	2018	Homo sapiens	OP535312
OP535320	Wed Jun 26 18:51:23 CDT 2024	MPXV; 2; B_isolate MPXV_Nigeria_2017_3008	197549	OP535320	MPXV_OP535320	Virus_dsDNA_env; Poxviridae; Chordopoxvirinae; Orthopoxvirus; MPXV; 2; B	Monkeypox virus	Linear	OP535320 NGA 2017	West Af	2	2	W Africa	NGA	Nigeria: Abia	B	Human	MPXV_Nigeria_2017_3008	2017	Homo sapiens	OP535320
OP535322	Wed Jun 26 18:51:23 CDT 2024	MPXV; 2; B_isolate MPXV_Nigeria_2017_2958	197166	OP535322	MPXV_OP535322	Virus_dsDNA_env; Poxviridae; Chordopoxvirinae; Orthopoxvirus; MPXV; 2; B	Monkeypox virus	Linear	OP535322 NGA 2017	West Af	2	2	W Africa	NGA	Nigeria: Edo	B	Human	MPXV_Nigeria_2017_2958	2017	Homo sapiens	OP535322
OP535323	Wed Jun 26 18:51:23 CDT 2024	MPXV; 2; B_isolate MPXV_Nigeria_2017_2948	197311	OP535323	MPXV_OP535323	Virus_dsDNA_env; Poxviridae; Chordopoxvirinae; Orthopoxvirus; MPXV; 2; B	Monkeypox virus	Linear	OP535323 NGA 2017	West Af	2	2	W Africa	NGA	Nigeria: Bayelsa	B	Human	MPXV_Nigeria_2017_2948	2017	Homo sapiens	OP535323
OP535324	Wed Jun 26 18:51:23 CDT 2024	MPXV; 2; B_isolate MPXV_Nigeria_2018_5302	197234	OP535324	MPXV_OP535324	Virus_dsDNA_env; Poxviridae; Chordopoxvirinae; Orthopoxvirus; MPXV; 2; B	Monkeypox virus	Linear	OP535324 NGA 2018	West Af	2	2	W Africa	NGA	Nigeria: Imo	B	Human	MPXV_Nigeria_2018_5302	2018	Homo sapiens	OP535324
OP535325	Wed Jun 26 18:51:23 CDT 2024	MPXV; 2; B_isolate MPXV_Nigeria_2018_5316	197172	OP535325	MPXV_OP535325	Virus_dsDNA_env; Poxviridae; Chordopoxvirinae; Orthopoxvirus; MPXV; 2; B	Monkeypox virus	Linear	OP535325 NGA 2018	West Af	2	2	W Africa	NGA	Nigeria	B	Human	MPXV_Nigeria_2018_5316	2018	Homo sapiens	OP535325
OP535327	Wed Jun 26 18:51:23 CDT 2024	MPXV; 2; B_isolate MPXV_Nigeria_2018_5307	197183	OP535327	MPXV_OP535327	Virus_dsDNA_env; Poxviridae; Chordopoxvirinae; Orthopoxvirus; MPXV; 2; B	Monkeypox virus	Linear	OP535327 NGA 2018	West Af	2	2	W Africa	NGA	Nigeria: Rivers	B	Human	MPXV_Nigeria_2018_5307	2018	Homo sapiens	OP535327
OP535328	Wed Jun 26 18:51:23 CDT 2024	MPXV; 2; B_isolate MPXV_Nigeria_2018_5306	197163	OP535328	MPXV_OP535328	Virus_dsDNA_env; Poxviridae; Chordopoxvirinae; Orthopoxvirus; MPXV; 2; B	Monkeypox virus	Linear	OP535328 NGA 2018	West Af	2	2	W Africa	NGA	Nigeria: Rivers	B	Human	MPXV_Nigeria_2018_5306	2018	Homo sapiens	OP535328
OP535329	Wed Jun 26 18:51:23 CDT 2024	MPXV; 2; B_isolate MPXV_Nigeria_2018_5305	197228	OP535329	MPXV_OP535329	Virus_dsDNA_env; Poxviridae; Chordopoxvirinae; Orthopoxvirus; MPXV; 2; B	Monkeypox virus	Linear	OP535329 NGA 2018	West Af	2	2	W Africa	NGA	Nigeria: Rivers	B	Human	MPXV_Nigeria_2018_5305	2018	Homo sapiens	OP535329
OP535333	Wed Jun 26 18:51:23 CDT 2024	MPXV; 2; B_isolate MPXV_Nigeria_2018_5231	197398	OP535333	MPXV_OP535333	Virus_dsDNA_env; Poxviridae; Chordopoxvirinae; Orthopoxvirus; MPXV; 2; B	Monkeypox virus	Linear	OP535333 NGA 2018	West Af	2	2	W Africa	NGA	Nigeria: Oyo	B	Human	MPXV_Nigeria_2018_5231	2018	Homo sapiens	OP535333
OP535335	Wed Jun 26 18:51:23 CDT 2024	MPXV; 2; B_isolate MPXV_Nigeria_2017_2947	197310	OP535335	MPXV_OP535335	Virus_dsDNA_env; Poxviridae; Chordopoxvirinae; Orthopoxvirus; MPXV; 2; B	Monkeypox virus	Linear	OP535335 NGA 2017	West Af	2	2	W Africa	NGA	Nigeria: Bayelsa	B	Human	MPXV_Nigeria_2017_2947	2017	Homo sapiens	OP535335
OP535336	Wed Jun 26 18:51:23 CDT 2024	MPXV; 2; B_isolate MPXV_Nigeria_2017_2946	197303	OP535336	MPXV_OP535336	Virus_dsDNA_env; Poxviridae; Chordopoxvirinae; Orthopoxvirus; MPXV; 2; B	Monkeypox virus	Linear	OP535336 NGA 2017	West Af	2	2	W Africa	NGA	Nigeria: Enugu	B	Human	MPXV_Nigeria_2017_2946	2017	Homo sapiens	OP535336
OP535337	Wed Jun 26 18:51:23 CDT 2024	MPXV; 2; B_isolate MPXV_Nigeria_2017_2945	197306	OP535337	MPXV_OP535337	Virus_dsDNA_env; Poxviridae; Chordopoxvirinae; Orthopoxvirus; MPXV; 2; B	Monkeypox virus	Linear	OP535337 NGA 2017	West Af	2	2	W Africa	NGA	Nigeria: Bayelsa	B	Human	MPXV_Nigeria_2017_2945	2017	Homo sapiens	OP535337
OP535340	Wed Jun 26 18:51:23 CDT 2024	MPXV; 2; B_isolate MPXV_Nigeria_2017_2888	197306	OP535340	MPXV_OP535340	Virus_dsDNA_env; Poxviridae; Chordopoxvirinae; Orthopoxvirus; MPXV; 2; B	Monkeypox virus	Linear	OP535340 NGA 2017	West Af	2	2	W Africa	NGA	Nigeria: Akwa Ibom	B	Human	MPXV_Nigeria_2017_2888	2017	Homo sapiens	OP535340
OP535341	Wed Jun 26 18:51:23 CDT 2024	MPXV; 2; B_isolate MPXV_Nigeria_2017_2886	197306	OP535341	MPXV_OP535341	Virus_dsDNA_env; Poxviridae; Chordopoxvirinae; Orthopoxvirus; MPXV; 2; B	Monkeypox virus	Linear	OP535341 NGA 2017	West Af	2	2	W Africa	NGA	Nigeria: Bayelsa	B	Human	MPXV_Nigeria_2017_2886	2017	Homo sapiens	OP535341
OP536686	Wed Jun 26 18:51:23 CDT 2024	MPXV; 2; B_isolate MPXV-USA-IL-IDPH-025	197083	OP536686	MPXV_OP536686	Virus_dsDNA_env; Poxviridae; Chordopoxvirinae; Orthopoxvirus; MPXV; 2; B	Monkeypox virus	Linear	OP536686 USA 2022	West Af	3	2	N America	USA	USA: IL	B	Human	MPXV-USA-IL-IDPH-025	2022	Homo sapiens	OP536686
OP536688	Wed Jun 26 18:51:23 CDT 2024	MPXV; 2; B_isolate MPXV-USA-IL-IDPH-027	197084	OP536688	MPXV_OP536688	Virus_dsDNA_env; Poxviridae; Chordopoxvirinae; Orthopoxvirus; MPXV; 2; B	Monkeypox virus	Linear	OP536688 USA 2022	West Af	3	2	N America	USA	USA: IL	B	Human	MPXV-USA-IL-IDPH-027	2022	Homo sapiens	OP536688
OP536697	Wed Jun 26 18:51:23 CDT 2024	MPXV; 2; B_isolate MPXV-USA-IL-IDPH-036	197083	OP536697	MPXV_OP536697	Virus_dsDNA_env; Poxviridae; Chordopoxvirinae; Orthopoxvirus; MPXV; 2; B	Monkeypox virus	Linear	OP536697 USA 2022	West Af	3	2	N America	USA	USA: IL	B	Human	MPXV-USA-IL-IDPH-036	2022	Homo sapiens	OP536697
OP536702	Wed Jun 26 18:51:23 CDT 2024	MPXV; 2; B_isolate MPXV-USA-IL-IDPH-041	197085	OP536702	MPXV_OP536702	Virus_dsDNA_env; Poxviridae; Chordopoxvirinae; Orthopoxvirus; MPXV; 2; B	Monkeypox virus	Linear	OP536702 USA 2022	West Af	3	2	N America	USA	USA: IL	B	Human	MPXV-USA-IL-IDPH-041	2022	Homo sapiens	OP536702
OP536704	Wed Jun 26 18:51:23 CDT 2024	MPXV; 2; B_isolate MPXV-USA-IL-IDPH-043	197083	OP536704	MPXV_OP536704	Virus_dsDNA_env; Poxviridae; Chordopoxvirinae; Orthopoxvirus; MPXV; 2; B	Monkeypox virus	Linear	OP536704 USA 2022	West Af	3	2	N America	USA	USA: IL	B	Human	MPXV-USA-IL-IDPH-043	2022	Homo sapiens	OP536704
OP536709	Wed Jun 26 18:51:23 CDT 2024	MPXV; 2; B_isolate MPXV-USA-IL-IDPH-048	197083	OP536709	MPXV_OP536709	Virus_dsDNA_env; Poxviridae; Chordopoxvirinae; Orthopoxvirus; MPXV; 2; B	Monkeypox virus	Linear	OP536709 USA 2022	West Af	3	2	N America	USA	USA: IL	B	Human	MPXV-USA-IL-IDPH-048	2022	Homo sapiens	OP536709
OP536711	Wed Jun 26 18:51:23 CDT 2024	MPXV; 2; B_isolate MPXV-USA-IL-IDPH-050	197083	OP536711	MPXV_OP536711	Virus_dsDNA_env; Poxviridae; Chordopoxvirinae; Orthopoxvirus; MPXV; 2; B	Monkeypox virus	Linear	OP536711 USA 2022	West Af	3	2	N America	USA	USA: IL	B	Human	MPXV-USA-IL-IDPH-050	2022	Homo sapiens	OP536711
OP536712	Wed Jun 26 18:51:23 CDT 2024	MPXV; 2; B_isolate MPXV-USA-IL-IDPH-051	197083	OP536712	MPXV_OP536712	Virus_dsDNA_env; Poxviridae; Chordopoxvirinae; Orthopoxvirus; MPXV; 2; B	Monkeypox virus	Linear	OP536712 USA 2022	West Af	3	2	N America	USA	USA: IL	B	Human	MPXV-USA-IL-IDPH-051	2022	Homo sapiens	OP536712
OP536713	Wed Jun 26 18:51:23 CDT 2024	MPXV; 2; B_isolate MPXV-USA-IL-IDPH-052	197083	OP536713	MPXV_OP536713	Virus_dsDNA_env; Poxviridae; Chordopoxvirinae; Orthopoxvirus; MPXV; 2; B	Monkeypox virus	Linear	OP536713 USA 2022	West Af	3	2	N America	USA	USA: IL	B	Human	MPXV-USA-IL-IDPH-052	2022	Homo sapiens	OP536713
OP536718	Wed Jun 26 18:51:23 CDT 2024	MPXV; 2; B_isolate MPXV-USA-IL-IDPH-057	197084	OP536718	MPXV_OP536718	Virus_dsDNA_env; Poxviridae; Chordopoxvirinae; Orthopoxvirus; MPXV; 2; B	Monkeypox virus	Linear	OP536718 USA 2022	West Af	3	2	N America	USA	USA: IL	B	Human	MPXV-USA-IL-IDPH-057	2022	Homo sapiens	OP536718
OP536731	Wed Jun 26 18:51:23 CDT 2024	MPXV; 2; B_isolate MPXV-USA-IL-IDPH-070	197084	OP536731	MPXV_OP536731	Virus_dsDNA_env; Poxviridae; Chordopoxvirinae; Orthopoxvirus; MPXV; 2; B	Monkeypox virus	Linear	OP536731 USA 2022	West Af	3	2	N America	USA	USA: IL	B	Human	MPXV-USA-IL-IDPH-070	2022	Homo sapiens	OP536731
OP536732	Wed Jun 26 18:51:23 CDT 2024	MPXV; 2; B_isolate MPXV-USA-IL-IDPH-071	197083	OP536732	MPXV_OP536732	Virus_dsDNA_env; Poxviridae; Chordopoxvirinae; Orthopoxvirus; MPXV; 2; B	Monkeypox virus	Linear	OP536732 USA 2022	West Af	3	2	N America	USA	USA: IL	B	Human	MPXV-USA-IL-IDPH-071	2022	Homo sapiens	OP536732
OP536737	Wed Jun 26 18:51:23 CDT 2024	MPXV; 2; B_isolate MPXV-USA-IL-IDPH-076	197083	OP536737	MPXV_OP536737	Virus_dsDNA_env; Poxviridae; Chordopoxvirinae; Orthopoxvirus; MPXV; 2; B	Monkeypox virus	Linear	OP536737 USA 2022	West Af	3	2	N America	USA	USA: IL	B	Human	MPXV-USA-IL-IDPH-076	2022	Homo sapiens	OP536737
OP536738	Wed Jun 26 18:51:23 CDT 2024	MPXV; 2; B_isolate MPXV-USA-IL-IDPH-077	197084	OP536738	MPXV_OP536738	Virus_dsDNA_env; Poxviridae; Chordopoxvirinae; Orthopoxvirus; MPXV; 2; B	Monkeypox virus	Linear	OP536738 USA 2022	West Af	3	2	N America	USA	USA: IL	B	Human	MPXV-USA-IL-IDPH-077	2022	Homo sapiens	OP536738
OP536740	Wed Jun 26 18:51:23 CDT 2024	MPXV; 2; B_isolate MPXV-USA-IL-IDPH-079	197083	OP536740	MPXV_OP536740	Virus_dsDNA_env; Poxviridae; Chordopoxvirinae; Orthopoxvirus; MPXV; 2; B	Monkeypox virus	Linear	OP536740 USA 2022	West Af	3	2	N America	USA	USA: IL	B	Human	MPXV-USA-IL-IDPH-079	2022	Homo sapiens	OP536740
OP536742	Wed Jun 26 18:51:23 CDT 2024	MPXV; 2; B_isolate MPXV-USA-IL-IDPH-081	197083	OP536742	MPXV_OP536742	Virus_dsDNA_env; Poxviridae; Chordopoxvirinae; Orthopoxvirus; MPXV; 2; B	Monkeypox virus	Linear	OP536742 USA 2022	West Af	3	2	N America	USA	USA: IL	B	Human	MPXV-USA-IL-IDPH-081	2022	Homo sapiens	OP536742
OP536745	Wed Jun 26 18:51:23 CDT 2024	MPXV; 2; B_isolate MPXV-USA-IL-IDPH-084	197084	OP536745	MPXV_OP536745	Virus_dsDNA_env; Poxviridae; Chordopoxvirinae; Orthopoxvirus; MPXV; 2; B	Monkeypox virus	Linear	OP536745 USA 2022	West Af	3	2	N America	USA	USA: IL	B	Human	MPXV-USA-IL-IDPH-084	2022	Homo sapiens	OP536745
OP580151	Wed Jun 26 18:51:23 CDT 2024	MPXV; 2; B_isolate MPXV/USA/CA-CDPH-MPX000002/2022	197193	OP580151	MPXV_OP580151	Virus_dsDNA_env; Poxviridae; Chordopoxvirinae; Orthopoxvirus; MPXV; 2; B	Monkeypox virus	Linear	OP580151 USA 2022	West Af	3	2	N America	USA	USA: CA	B	Human	MPXV/USA/CA-CDPH-MPX000002/2022	2022	Homo sapiens	OP580151
OP580153	Wed Jun 26 18:51:23 CDT 2024	MPXV; 2; B_isolate MPXV/USA/CA-CDPH-MPX000005/2022	197194	OP580153	MPXV_OP580153	Virus_dsDNA_env; Poxviridae; Chordopoxvirinae; Orthopoxvirus; MPXV; 2; B	Monkeypox virus	Linear	OP580153 USA 2022	West Af	3	2	N America	USA	USA: CA	B	Human	MPXV/USA/CA-CDPH-MPX000005/2022	2022	Homo sapiens	OP580153
OP580154	Wed Jun 26 18:51:23 CDT 2024	MPXV; 2; B_isolate MPXV/USA/CA-CDPH-MPX000006/2022	197174	OP580154	MPXV_OP580154	Virus_dsDNA_env; Poxviridae; Chordopoxvirinae; Orthopoxvirus; MPXV; 2; B	Monkeypox virus	Linear	OP580154 USA 2022	West Af	3	2	N America	USA	USA: CA	B	Human	MPXV/USA/CA-CDPH-MPX000006/2022	2022	Homo sapiens	OP580154
OP580156	Wed Jun 26 18:51:23 CDT 2024	MPXV; 2; B_isolate MPXV/USA/CA-CDPH-MPX000009/2022	197200	OP580156	MPXV_OP580156	Virus_dsDNA_env; Poxviridae; Chordopoxvirinae; Orthopoxvirus; MPXV; 2; B	Monkeypox virus	Linear	OP580156 USA 2022	West Af	3	2	N America	USA	USA: CA	B	Human	MPXV/USA/CA-CDPH-MPX000009/2022	2022	Homo sapiens	OP580156
OP580157	Wed Jun 26 18:51:23 CDT 2024	MPXV; 2; B_isolate MPXV/USA/CA-CDPH-MPX000010/2022	197194	OP580157	MPXV_OP580157	Virus_dsDNA_env; Poxviridae; Chordopoxvirinae; Orthopoxvirus; MPXV; 2; B	Monkeypox virus	Linear	OP580157 USA 2022	West Af	3	2	N America	USA	USA: CA	B	Human	MPXV/USA/CA-CDPH-MPX000010/2022	2022	Homo sapiens	OP580157
OP587252	Wed Jun 26 18:51:23 CDT 2024	MPXV; 2; B_isolate MPXV/USA/CA-CDPH-MPX000023/2022	195601	OP587252	MPXV_OP587252	Virus_dsDNA_env; Poxviridae; Chordopoxvirinae; Orthopoxvirus; MPXV; 2; B	Monkeypox virus	Linear	OP587252 USA 2022	West Af	3	2	N America	USA	USA: CA	B	Human	MPXV/USA/CA-CDPH-MPX000023/2022	2022	Homo sapiens	OP587252
OP587257	Wed Jun 26 18:51:23 CDT 2024	MPXV; 2; B_isolate MPXV/USA/CA-CDPH-MPX000033/2022	195660	OP587257	MPXV_OP587257	Virus_dsDNA_env; Poxviridae; Chordopoxvirinae; Orthopoxvirus; MPXV; 2; B	Monkeypox virus	Linear	OP587257 USA 2022	West Af	3	2	N America	USA	USA: CA	B	Human	MPXV/USA/CA-CDPH-MPX000033/2022	2022	Homo sapiens	OP587257
OP587259	Wed Jun 26 18:51:23 CDT 2024	MPXV; 2; B_isolate MPXV/USA/CA-CDPH-MPX000037/2022	196368	OP587259	MPXV_OP587259	Virus_dsDNA_env; Poxviridae; Chordopoxvirinae; Orthopoxvirus; MPXV; 2; B	Monkeypox virus	Linear	OP587259 USA 2022	West Af	3	2	N America	USA	USA: CA	B	Human	MPXV/USA/CA-CDPH-MPX000037/2022	2022	Homo sapiens	OP587259
OP587260	Wed Jun 26 18:51:23 CDT 2024	MPXV; 2; B_isolate MPXV/USA/CA-CDPH-MPX000038/2022	195618	OP587260	MPXV_OP587260	Virus_dsDNA_env; Poxviridae; Chordopoxvirinae; Orthopoxvirus; MPXV; 2; B	Monkeypox virus	Linear	OP587260 USA 2022	West Af	3	2	N America	USA	USA: CA	B	Human	MPXV/USA/CA-CDPH-MPX000038/2022	2022	Homo sapiens	OP587260
OP587264	Wed Jun 26 18:51:23 CDT 2024	MPXV; 2; B_isolate MPXV/USA/CA-CDPH-MPX000040/2022	196099	OP587264	MPXV_OP587264	Virus_dsDNA_env; Poxviridae; Chordopoxvirinae; Orthopoxvirus; MPXV; 2; B	Monkeypox virus	Linear	OP587264 USA 2022	West Af	3	2	N America	USA	USA: CA	B	Human	MPXV/USA/CA-CDPH-MPX000040/2022	2022	Homo sapiens	OP587264
OP588945	Wed Jun 26 18:51:23 CDT 2024	MPXV; 2; B_isolate MPXV/USA/NY-URMC-2207A101/2022	197209	OP588945	MPXV_OP588945	Virus_dsDNA_env; Poxviridae; Chordopoxvirinae; Orthopoxvirus; MPXV; 2; B	Monkeypox virus	Linear	OP588945 USA 2022	West Af	3	2	N America	USA	USA: NY	B	Human	MPXV/USA/NY-URMC-2207A101/2022	2022	Homo sapiens	OP588945
OP588946	Wed Jun 26 18:51:23 CDT 2024	MPXV; 2; B_isolate MPXV/USA/NY-URMC-2207A102/2022	197209	OP588946	MPXV_OP588946	Virus_dsDNA_env; Poxviridae; Chordopoxvirinae; Orthopoxvirus; MPXV; 2; B	Monkeypox virus	Linear	OP588946 USA 2022	West Af	3	2	N America	USA	USA: NY	B	Human	MPXV/USA/NY-URMC-2207A102/2022	2022	Homo sapiens	OP588946
OP594192	Wed Jun 26 18:51:23 CDT 2024	MPXV; 2; B_isolate MPXV/Germany/2022/RKI428	197140	OP594192	MPXV_OP594192	Virus_dsDNA_env; Poxviridae; Chordopoxvirinae; Orthopoxvirus; MPXV; 2; B	Monkeypox virus	Linear	OP594192 DEU 2022	West Af	3	2	Europe	DEU	Germany	B	Human	MPXV/Germany/2022/RKI428	2022	Homo sapiens	OP594192
OP594193	Wed Jun 26 18:51:23 CDT 2024	MPXV; 2; B_isolate MPXV/Germany/2022/RKI429	197139	OP594193	MPXV_OP594193	Virus_dsDNA_env; Poxviridae; Chordopoxvirinae; Orthopoxvirus; MPXV; 2; B	Monkeypox virus	Linear	OP594193 DEU 2022	West Af	3	2	Europe	DEU	Germany	B	Human	MPXV/Germany/2022/RKI429	2022	Homo sapiens	OP594193
OP594195	Wed Jun 26 18:51:23 CDT 2024	MPXV; 2; B_isolate MPXV/Germany/2022/RKI431	197139	OP594195	MPXV_OP594195	Virus_dsDNA_env; Poxviridae; Chordopoxvirinae; Orthopoxvirus; MPXV; 2; B	Monkeypox virus	Linear	OP594195 DEU 2022	West Af	3	2	Europe	DEU	Germany	B	Human	MPXV/Germany/2022/RKI431	2022	Homo sapiens	OP594195
OP594196	Wed Jun 26 18:51:23 CDT 2024	MPXV; 2; B_isolate MPXV/Germany/2022/RKI432	197140	OP594196	MPXV_OP594196	Virus_dsDNA_env; Poxviridae; Chordopoxvirinae; Orthopoxvirus; MPXV; 2; B	Monkeypox virus	Linear	OP594196 DEU 2022	West Af	3	2	Europe	DEU	Germany	B	Human	MPXV/Germany/2022/RKI432	2022	Homo sapiens	OP594196
OP594197	Wed Jun 26 18:51:23 CDT 2024	MPXV; 2; B_isolate MPXV/Germany/2022/RKI433	197139	OP594197	MPXV_OP594197	Virus_dsDNA_env; Poxviridae; Chordopoxvirinae; Orthopoxvirus; MPXV; 2; B	Monkeypox virus	Linear	OP594197 DEU 2022	West Af	3	2	Europe	DEU	Germany	B	Human	MPXV/Germany/2022/RKI433	2022	Homo sapiens	OP594197
OP594203	Wed Jun 26 18:51:23 CDT 2024	MPXV; 2; B_isolate MPXV/Germany/2022/RKI439	197139	OP594203	MPXV_OP594203	Virus_dsDNA_env; Poxviridae; Chordopoxvirinae; Orthopoxvirus; MPXV; 2; B	Monkeypox virus	Linear	OP594203 DEU 2022	West Af	3	2	Europe	DEU	Germany	B	Human	MPXV/Germany/2022/RKI439	2022	Homo sapiens	OP594203
OP594204	Wed Jun 26 18:51:23 CDT 2024	MPXV; 2; B_isolate MPXV/Germany/2022/RKI440	197140	OP594204	MPXV_OP594204	Virus_dsDNA_env; Poxviridae; Chordopoxvirinae; Orthopoxvirus; MPXV; 2; B	Monkeypox virus	Linear	OP594204 DEU 2022	West Af	3	2	Europe	DEU	Germany	B	Human	MPXV/Germany/2022/RKI440	2022	Homo sapiens	OP594204
OP594207	Wed Jun 26 18:51:23 CDT 2024	MPXV; 2; B_isolate MPXV/Germany/2022/RKI443	197139	OP594207	MPXV_OP594207	Virus_dsDNA_env; Poxviridae; Chordopoxvirinae; Orthopoxvirus; MPXV; 2; B	Monkeypox virus	Linear	OP594207 DEU 2022	West Af	3	2	Europe	DEU	Germany	B	Human	MPXV/Germany/2022/RKI443	2022	Homo sapiens	OP594207
OP597769	Wed Jun 26 18:51:23 CDT 2024	MPXV; 2; B_isolate MPXV/Egypt/MOH-NRC-0002/2022	197201	OP597769	MPXV_OP597769	Virus_dsDNA_env; Poxviridae; Chordopoxvirinae; Orthopoxvirus; MPXV; 2; B	Monkeypox virus	Linear	OP597769 EGY 2022	West Af	2	2	N Africa	EGY	Egypt	B	Human	MPXV/Egypt/MOH-NRC-0002/2022	2022	Homo sapiens	OP597769
OP603001	Wed Jun 26 18:51:23 CDT 2024	MPXV; 2; B_isolate MPXV_USA_2022_AR0001	197222	OP603001	MPXV_OP603001	Virus_dsDNA_env; Poxviridae; Chordopoxvirinae; Orthopoxvirus; MPXV; 2; B	Monkeypox virus	Linear	OP603001 USA 2022	West Af	3	2	N America	USA	USA: AR	B	Human	MPXV_USA_2022_AR0001	2022	Homo sapiens	OP603001
OP603002	Wed Jun 26 18:51:23 CDT 2024	MPXV; 2; B_isolate MPXV_USA_2022_WI0001	197074	OP603002	MPXV_OP603002	Virus_dsDNA_env; Poxviridae; Chordopoxvirinae; Orthopoxvirus; MPXV; 2; B	Monkeypox virus	Linear	OP603002 USA 2022	West Af	3	2	N America	USA	USA: WI	B	Human	MPXV_USA_2022_WI0001	2022	Homo sapiens	OP603002
OP603003	Wed Jun 26 18:51:23 CDT 2024	MPXV; 2; B_isolate MPXV_USA_2022_GA0016	197128	OP603003	MPXV_OP603003	Virus_dsDNA_env; Poxviridae; Chordopoxvirinae; Orthopoxvirus; MPXV; 2; B	Monkeypox virus	Linear	OP603003 USA 2022	West Af	3	2	N America	USA	USA: GA	B	Human	MPXV_USA_2022_GA0016	2022	Homo sapiens	OP603003
OP603004	Wed Jun 26 18:51:23 CDT 2024	MPXV; 2; B_isolate MPXV_USA_2022_MN0004	197142	OP603004	MPXV_OP603004	Virus_dsDNA_env; Poxviridae; Chordopoxvirinae; Orthopoxvirus; MPXV; 2; B	Monkeypox virus	Linear	OP603004 USA 2022	West Af	3	2	N America	USA	USA: MN	B	Human	MPXV_USA_2022_MN0004	2022	Homo sapiens	OP603004
OP603005	Wed Jun 26 18:51:23 CDT 2024	MPXV; 2; B_isolate MPXV_USA_2022_SC0003	197170	OP603005	MPXV_OP603005	Virus_dsDNA_env; Poxviridae; Chordopoxvirinae; Orthopoxvirus; MPXV; 2; B	Monkeypox virus	Linear	OP603005 USA 2022	West Af	3	2	N America	USA	USA: SC	B	Human	MPXV_USA_2022_SC0003	2022	Homo sapiens	OP603005
OP603006	Wed Jun 26 18:51:23 CDT 2024	MPXV; 2; B_isolate MPXV_USA_2022_NJ0003	197174	OP603006	MPXV_OP603006	Virus_dsDNA_env; Poxviridae; Chordopoxvirinae; Orthopoxvirus; MPXV; 2; B	Monkeypox virus	Linear	OP603006 USA 2022	West Af	3	2	N America	USA	USA: NJ	B	Human	MPXV_USA_2022_NJ0003	2022	Homo sapiens	OP603006
OP603007	Wed Jun 26 18:51:23 CDT 2024	MPXV; 2; B_isolate MPXV_USA_2022_PA0007	197174	OP603007	MPXV_OP603007	Virus_dsDNA_env; Poxviridae; Chordopoxvirinae; Orthopoxvirus; MPXV; 2; B	Monkeypox virus	Linear	OP603007 USA 2022	West Af	3	2	N America	USA	USA: PA	B	Human	MPXV_USA_2022_PA0007	2022	Homo sapiens	OP603007
OP603008	Wed Jun 26 18:51:23 CDT 2024	MPXV; 2; B_isolate MPXV_USA_2022_NY0022	197179	OP603008	MPXV_OP603008	Virus_dsDNA_env; Poxviridae; Chordopoxvirinae; Orthopoxvirus; MPXV; 2; B	Monkeypox virus	Linear	OP603008 USA 2022	West Af	3	2	N America	USA	USA: NY	B	Human	MPXV_USA_2022_NY0022	2022	Homo sapiens	OP603008
OP603009	Wed Jun 26 18:51:23 CDT 2024	MPXV; 2; B_isolate MPXV_USA_2022_AZ0003	197172	OP603009	MPXV_OP603009	Virus_dsDNA_env; Poxviridae; Chordopoxvirinae; Orthopoxvirus; MPXV; 2; B	Monkeypox virus	Linear	OP603009 USA 2022	West Af	3	2	N America	USA	USA: AZ	B	Human	MPXV_USA_2022_AZ0003	2022	Homo sapiens	OP603009
OP603010	Wed Jun 26 18:51:23 CDT 2024	MPXV; 2; B_isolate MPXV_USA_2022_MI0002	197173	OP603010	MPXV_OP603010	Virus_dsDNA_env; Poxviridae; Chordopoxvirinae; Orthopoxvirus; MPXV; 2; B	Monkeypox virus	Linear	OP603010 USA 2022	West Af	3	2	N America	USA	USA: MI	B	Human	MPXV_USA_2022_MI0002	2022	Homo sapiens	OP603010
OP603011	Wed Jun 26 18:51:23 CDT 2024	MPXV; 2; B_isolate MPXV_USA_2022_IN0005	197234	OP603011	MPXV_OP603011	Virus_dsDNA_env; Poxviridae; Chordopoxvirinae; Orthopoxvirus; MPXV; 2; B	Monkeypox virus	Linear	OP603011 USA 2022	West Af	3	2	N America	USA	USA: IN	B	Human	MPXV_USA_2022_IN0005	2022	Homo sapiens	OP603011
OP603012	Wed Jun 26 18:51:23 CDT 2024	MPXV; 2; B_isolate MPXV_USA_2022_CA0034	197182	OP603012	MPXV_OP603012	Virus_dsDNA_env; Poxviridae; Chordopoxvirinae; Orthopoxvirus; MPXV; 2; B	Monkeypox virus	Linear	OP603012 USA 2022	West Af	3	2	N America	USA	USA: CA	B	Human	MPXV_USA_2022_CA0034	2022	Homo sapiens	OP603012
OP603013	Wed Jun 26 18:51:23 CDT 2024	MPXV; 2; B_isolate MPXV_USA_2022_AZ0002	197172	OP603013	MPXV_OP603013	Virus_dsDNA_env; Poxviridae; Chordopoxvirinae; Orthopoxvirus; MPXV; 2; B	Monkeypox virus	Linear	OP603013 USA 2022	West Af	3	2	N America	USA	USA: AZ	B	Human	MPXV_USA_2022_AZ0002	2022	Homo sapiens	OP603013
OP603014	Wed Jun 26 18:51:23 CDT 2024	MPXV; 2; B_isolate MPXV_USA_2022_NY0021	197147	OP603014	MPXV_OP603014	Virus_dsDNA_env; Poxviridae; Chordopoxvirinae; Orthopoxvirus; MPXV; 2; B	Monkeypox virus	Linear	OP603014 USA 2022	West Af	3	2	N America	USA	USA: NY	B	Human	MPXV_USA_2022_NY0021	2022	Homo sapiens	OP603014
OP603015	Wed Jun 26 18:51:23 CDT 2024	MPXV; 2; B_isolate MPXV_USA_2022_GA0017	197195	OP603015	MPXV_OP603015	Virus_dsDNA_env; Poxviridae; Chordopoxvirinae; Orthopoxvirus; MPXV; 2; B	Monkeypox virus	Linear	OP603015 USA 2022	West Af	3	2	N America	USA	USA: GA	B	Human	MPXV_USA_2022_GA0017	2022	Homo sapiens	OP603015
OP603016	Wed Jun 26 18:51:23 CDT 2024	MPXV; 2; B_isolate MPXV_USA_2022_CA0032	197192	OP603016	MPXV_OP603016	Virus_dsDNA_env; Poxviridae; Chordopoxvirinae; Orthopoxvirus; MPXV; 2; B	Monkeypox virus	Linear	OP603016 USA 2022	West Af	3	2	N America	USA	USA: CA	B	Human	MPXV_USA_2022_CA0032	2022	Homo sapiens	OP603016
OP603017	Wed Jun 26 18:51:23 CDT 2024	MPXV; 2; B_isolate MPXV_USA_2022_CA0033	197123	OP603017	MPXV_OP603017	Virus_dsDNA_env; Poxviridae; Chordopoxvirinae; Orthopoxvirus; MPXV; 2; B	Monkeypox virus	Linear	OP603017 USA 2022	West Af	3	2	N America	USA	USA: CA	B	Human	MPXV_USA_2022_CA0033	2022	Homo sapiens	OP603017
OP603018	Wed Jun 26 18:51:23 CDT 2024	MPXV; 2; B_isolate MPXV_USA_2022_CA0031	197131	OP603018	MPXV_OP603018	Virus_dsDNA_env; Poxviridae; Chordopoxvirinae; Orthopoxvirus; MPXV; 2; B	Monkeypox virus	Linear	OP603018 USA 2022	West Af	3	2	N America	USA	USA: CA	B	Human	MPXV_USA_2022_CA0031	2022	Homo sapiens	OP603018
OP604519	Wed Jun 26 18:51:23 CDT 2024	MPXV; 2; B_isolate MPXV_USA_2022_SD0001	197179	OP604519	MPXV_OP604519	Virus_dsDNA_env; Poxviridae; Chordopoxvirinae; Orthopoxvirus; MPXV; 2; B	Monkeypox virus	Linear	OP604519 USA 2022	West Af	3	2	N America	USA	USA: SD	B	Human	MPXV_USA_2022_SD0001	2022	Homo sapiens	OP604519
OP604520	Wed Jun 26 18:51:23 CDT 2024	MPXV; 2; B_isolate MPXV_USA_2022_UT0003	193810	OP604520	MPXV_OP604520	Virus_dsDNA_env; Poxviridae; Chordopoxvirinae; Orthopoxvirus; MPXV; 2; B	Monkeypox virus	Linear	OP604520 USA 2022	West Af	3	2	N America	USA	USA: UT	B	Human	MPXV_USA_2022_UT0003	2022	Homo sapiens	OP604520
OP604521	Wed Jun 26 18:51:23 CDT 2024	MPXV; 2; B_isolate MPXV_USA_2022_TX0020	197106	OP604521	MPXV_OP604521	Virus_dsDNA_env; Poxviridae; Chordopoxvirinae; Orthopoxvirus; MPXV; 2; B	Monkeypox virus	Linear	OP604521 USA 2022	West Af	3	2	N America	USA	USA: TX	B	Human	MPXV_USA_2022_TX0020	2022	Homo sapiens	OP604521
OP604522	Wed Jun 26 18:51:23 CDT 2024	MPXV; 2; B_isolate MPXV_USA_2022_PA0008	197166	OP604522	MPXV_OP604522	Virus_dsDNA_env; Poxviridae; Chordopoxvirinae; Orthopoxvirus; MPXV; 2; B	Monkeypox virus	Linear	OP604522 USA 2022	West Af	3	2	N America	USA	USA: PA	B	Human	MPXV_USA_2022_PA0008	2022	Homo sapiens	OP604522
OP604523	Wed Jun 26 18:51:23 CDT 2024	MPXV; 2; B_isolate MPXV_USA_2022_NC0007	197218	OP604523	MPXV_OP604523	Virus_dsDNA_env; Poxviridae; Chordopoxvirinae; Orthopoxvirus; MPXV; 2; B	Monkeypox virus	Linear	OP604523 USA 2022	West Af	3	2	N America	USA	USA: NC	B	Human	MPXV_USA_2022_NC0007	2022	Homo sapiens	OP604523
OP604524	Wed Jun 26 18:51:23 CDT 2024	MPXV; 2; B_isolate MPXV_USA_2022_NV0003	197237	OP604524	MPXV_OP604524	Virus_dsDNA_env; Poxviridae; Chordopoxvirinae; Orthopoxvirus; MPXV; 2; B	Monkeypox virus	Linear	OP604524 USA 2022	West Af	3	2	N America	USA	USA: NV	B	Human	MPXV_USA_2022_NV0003	2022	Homo sapiens	OP604524
OP604525	Wed Jun 26 18:51:23 CDT 2024	MPXV; 2; B_isolate MXPV_USA_2022_NJ0010	197193	OP604525	MPXV_OP604525	Virus_dsDNA_env; Poxviridae; Chordopoxvirinae; Orthopoxvirus; MPXV; 2; B	Monkeypox virus	Linear	OP604525 USA 2022	West Af	3	2	N America	USA	USA: NJ	B	Human	MXPV_USA_2022_NJ0010	2022	Homo sapiens	OP604525
OP604526	Wed Jun 26 18:51:23 CDT 2024	MPXV; 2; B_isolate MPXV_USA_2022_NC0005	197174	OP604526	MPXV_OP604526	Virus_dsDNA_env; Poxviridae; Chordopoxvirinae; Orthopoxvirus; MPXV; 2; B	Monkeypox virus	Linear	OP604526 USA 2022	West Af	3	2	N America	USA	USA: NC	B	Human	MPXV_USA_2022_NC0005	2022	Homo sapiens	OP604526
OP604527	Wed Jun 26 18:51:23 CDT 2024	MPXV; 2; B_isolate MPXV_USA_2022_MD0002	197241	OP604527	MPXV_OP604527	Virus_dsDNA_env; Poxviridae; Chordopoxvirinae; Orthopoxvirus; MPXV; 2; B	Monkeypox virus	Linear	OP604527 USA 2022	West Af	3	2	N America	USA	USA: MD	B	Human	MPXV_USA_2022_MD0002	2022	Homo sapiens	OP604527
OP604528	Wed Jun 26 18:51:23 CDT 2024	MPXV; 2; B_isolate MPXV_USA_2022_MD0003	197209	OP604528	MPXV_OP604528	Virus_dsDNA_env; Poxviridae; Chordopoxvirinae; Orthopoxvirus; MPXV; 2; B	Monkeypox virus	Linear	OP604528 USA 2022	West Af	3	2	N America	USA	USA: MD	B	Human	MPXV_USA_2022_MD0003	2022	Homo sapiens	OP604528
OP604529	Wed Jun 26 18:51:23 CDT 2024	MPXV; 2; B_isolate MPXV_USA_2022_GA0011	197153	OP604529	MPXV_OP604529	Virus_dsDNA_env; Poxviridae; Chordopoxvirinae; Orthopoxvirus; MPXV; 2; B	Monkeypox virus	Linear	OP604529 USA 2022	West Af	3	2	N America	USA	USA: GA	B	Human	MPXV_USA_2022_GA0011	2022	Homo sapiens	OP604529
OP604530	Wed Jun 26 18:51:23 CDT 2024	MPXV; 2; B_isolate MPXV_USA_2022_FL0021	197197	OP604530	MPXV_OP604530	Virus_dsDNA_env; Poxviridae; Chordopoxvirinae; Orthopoxvirus; MPXV; 2; B	Monkeypox virus	Linear	OP604530 USA 2022	West Af	3	2	N America	USA	USA: FL	B	Human	MPXV_USA_2022_FL0021	2022	Homo sapiens	OP604530
OP604531	Wed Jun 26 18:51:23 CDT 2024	MPXV; 2; B_isolate MPXV_USA_2022_FL0020	197204	OP604531	MPXV_OP604531	Virus_dsDNA_env; Poxviridae; Chordopoxvirinae; Orthopoxvirus; MPXV; 2; B	Monkeypox virus	Linear	OP604531 USA 2022	West Af	3	2	N America	USA	USA: FL	B	Human	MPXV_USA_2022_FL0020	2022	Homo sapiens	OP604531
OP604532	Wed Jun 26 18:51:23 CDT 2024	MPXV; 2; B_isolate MPXV_USA_2022_DC0012	197184	OP604532	MPXV_OP604532	Virus_dsDNA_env; Poxviridae; Chordopoxvirinae; Orthopoxvirus; MPXV; 2; B	Monkeypox virus	Linear	OP604532 USA 2022	West Af	3	2	N America	USA	USA: DC	B	Human	MPXV_USA_2022_DC0012	2022	Homo sapiens	OP604532
OP604533	Wed Jun 26 18:51:23 CDT 2024	MPXV; 2; B_isolate MPXV_USA_2022_CA0035	197163	OP604533	MPXV_OP604533	Virus_dsDNA_env; Poxviridae; Chordopoxvirinae; Orthopoxvirus; MPXV; 2; B	Monkeypox virus	Linear	OP604533 USA 2022	West Af	3	2	N America	USA	USA: CA	B	Human	MPXV_USA_2022_CA0035	2022	Homo sapiens	OP604533
OP604565	Wed Jun 26 18:51:23 CDT 2024	MPXV; 2; B_isolate MPXV22/USA-NE-211	197188	OP604565	MPXV_OP604565	Virus_dsDNA_env; Poxviridae; Chordopoxvirinae; Orthopoxvirus; MPXV; 2; B	Monkeypox virus	Linear	OP604565 USA 2022	West Af	3	2	N America	USA	USA: NE	B	Human	MPXV22/USA-NE-211	2022	Homo sapiens	OP604565
OP604566	Wed Jun 26 18:51:23 CDT 2024	MPXV; 2; B_isolate MPXV22/USA-NE-230	197205	OP604566	MPXV_OP604566	Virus_dsDNA_env; Poxviridae; Chordopoxvirinae; Orthopoxvirus; MPXV; 2; B	Monkeypox virus	Linear	OP604566 USA 2022	West Af	3	2	N America	USA	USA: NE	B	Human	MPXV22/USA-NE-230	2022	Homo sapiens	OP604566
OP604567	Wed Jun 26 18:51:23 CDT 2024	MPXV; 2; B_isolate MPXV22/USA-OK-288	197196	OP604567	MPXV_OP604567	Virus_dsDNA_env; Poxviridae; Chordopoxvirinae; Orthopoxvirus; MPXV; 2; B	Monkeypox virus	Linear	OP604567 USA 2022	West Af	3	2	N America	USA	USA: OK	B	Human	MPXV22/USA-OK-288	2022	Homo sapiens	OP604567
OP604568	Wed Jun 26 18:51:23 CDT 2024	MPXV; 2; B_isolate MPXV22/USA-OK-301	197199	OP604568	MPXV_OP604568	Virus_dsDNA_env; Poxviridae; Chordopoxvirinae; Orthopoxvirus; MPXV; 2; B	Monkeypox virus	Linear	OP604568 USA 2022	West Af	3	2	N America	USA	USA: OK	B	Human	MPXV22/USA-OK-301	2022	Homo sapiens	OP604568
OP604569	Wed Jun 26 18:51:23 CDT 2024	MPXV; 2; B_isolate MPXV22/USA-OK-302	197199	OP604569	MPXV_OP604569	Virus_dsDNA_env; Poxviridae; Chordopoxvirinae; Orthopoxvirus; MPXV; 2; B	Monkeypox virus	Linear	OP604569 USA 2022	West Af	3	2	N America	USA	USA: OK	B	Human	MPXV22/USA-OK-302	2022	Homo sapiens	OP604569
OP612674	Wed Jun 26 18:51:23 CDT 2024	MPXV; 2; B_isolate MPXV/003/19	197011	OP612674	MPXV_OP612674	Virus_dsDNA_env; Poxviridae; Chordopoxvirinae; Orthopoxvirus; MPXV; 2; B	Monkeypox virus	Linear	OP612674 NGA 2019	West Af	3	2	W Africa	NGA	Nigeria	B	Human	MPXV/003/19	2019	Homo sapiens	OP612674
OP612678	Wed Jun 26 18:51:23 CDT 2024	MPXV; 2; B_isolate MPXV/017/19	196950	OP612678	MPXV_OP612678	Virus_dsDNA_env; Poxviridae; Chordopoxvirinae; Orthopoxvirus; MPXV; 2; B	Monkeypox virus	Linear	OP612678 NGA 2019	West Af	2	2	W Africa	NGA	Nigeria	B	Human	MPXV/017/19	2019	Homo sapiens	OP612678
OP612682	Wed Jun 26 18:51:23 CDT 2024	MPXV; 2; B_isolate MPXV/040/19	197052	OP612682	MPXV_OP612682	Virus_dsDNA_env; Poxviridae; Chordopoxvirinae; Orthopoxvirus; MPXV; 2; B	Monkeypox virus	Linear	OP612682 NGA 2019	West Af	3	2	W Africa	NGA	Nigeria	B	Human	MPXV/040/19	2019	Homo sapiens	OP612682
OP612683	Wed Jun 26 18:51:23 CDT 2024	MPXV; 2; B_isolate MPXV/042/19	197061	OP612683	MPXV_OP612683	Virus_dsDNA_env; Poxviridae; Chordopoxvirinae; Orthopoxvirus; MPXV; 2; B	Monkeypox virus	Linear	OP612683 NGA 2019	West Af	3	2	W Africa	NGA	Nigeria	B	Human	MPXV/042/19	2019	Homo sapiens	OP612683
OP612684	Wed Jun 26 18:51:23 CDT 2024	MPXV; 2; B_isolate MPXV/046/19	197514	OP612684	MPXV_OP612684	Virus_dsDNA_env; Poxviridae; Chordopoxvirinae; Orthopoxvirus; MPXV; 2; B	Monkeypox virus	Linear	OP612684 NGA 2019	West Af	3	2	W Africa	NGA	Nigeria	B	Human	MPXV/046/19	2019	Homo sapiens	OP612684
OP612685	Wed Jun 26 18:51:23 CDT 2024	MPXV; 2; B_isolate MPXV/052/19	197034	OP612685	MPXV_OP612685	Virus_dsDNA_env; Poxviridae; Chordopoxvirinae; Orthopoxvirus; MPXV; 2; B	Monkeypox virus	Linear	OP612685 NGA 2019	West Af	3	2	W Africa	NGA	Nigeria	B	Human	MPXV/052/19	2019	Homo sapiens	OP612685
OP612686	Wed Jun 26 18:51:23 CDT 2024	MPXV; 2; B_isolate MPXV/053/19	197135	OP612686	MPXV_OP612686	Virus_dsDNA_env; Poxviridae; Chordopoxvirinae; Orthopoxvirus; MPXV; 2; B	Monkeypox virus	Linear	OP612686 NGA 2019	West Af	2	2	W Africa	NGA	Nigeria	B	Human	MPXV/053/19	2019	Homo sapiens	OP612686
OP612688	Wed Jun 26 18:51:23 CDT 2024	MPXV; 2; B_isolate MPXV/104/19	197087	OP612688	MPXV_OP612688	Virus_dsDNA_env; Poxviridae; Chordopoxvirinae; Orthopoxvirus; MPXV; 2; B	Monkeypox virus	Linear	OP612688 NGA 2019	West Af	3	2	W Africa	NGA	Nigeria	B	Human	MPXV/104/19	2019	Homo sapiens	OP612688
OP612690	Wed Jun 26 18:51:23 CDT 2024	MPXV; 2; B_isolate MPXV/113/19	197343	OP612690	MPXV_OP612690	Virus_dsDNA_env; Poxviridae; Chordopoxvirinae; Orthopoxvirus; MPXV; 2; B	Monkeypox virus	Linear	OP612690 NGA 2019	West Af	2	2	W Africa	NGA	Nigeria	B	Human	MPXV/113/19	2019	Homo sapiens	OP612690
OP612691	Wed Jun 26 18:51:23 CDT 2024	MPXV; 2; B_isolate MPXV/191/20	197387	OP612691	MPXV_OP612691	Virus_dsDNA_env; Poxviridae; Chordopoxvirinae; Orthopoxvirus; MPXV; 2; B	Monkeypox virus	Linear	OP612691 NGA 2020	West Af	2	2	W Africa	NGA	Nigeria	B	Human	MPXV/191/20	2020	Homo sapiens	OP612691
OP626104	Wed Jun 26 18:51:23 CDT 2024	MPXV; 2; B_isolate MPXV/Germany/2022/RKI466	197140	OP626104	MPXV_OP626104	Virus_dsDNA_env; Poxviridae; Chordopoxvirinae; Orthopoxvirus; MPXV; 2; B	Monkeypox virus	Linear	OP626104 DEU 2022	West Af	3	2	Europe	DEU	Germany	B	Human	MPXV/Germany/2022/RKI466	2022	Homo sapiens	OP626104
OP626105	Wed Jun 26 18:51:23 CDT 2024	MPXV; 2; B_isolate MPXV/Germany/2022/RKI467	197140	OP626105	MPXV_OP626105	Virus_dsDNA_env; Poxviridae; Chordopoxvirinae; Orthopoxvirus; MPXV; 2; B	Monkeypox virus	Linear	OP626105 DEU 2022	West Af	3	2	Europe	DEU	Germany	B	Human	MPXV/Germany/2022/RKI467	2022	Homo sapiens	OP626105
OP626106	Wed Jun 26 18:51:23 CDT 2024	MPXV; 2; B_isolate MPXV/Germany/2022/RKI468	197140	OP626106	MPXV_OP626106	Virus_dsDNA_env; Poxviridae; Chordopoxvirinae; Orthopoxvirus; MPXV; 2; B	Monkeypox virus	Linear	OP626106 DEU 2022	West Af	3	2	Europe	DEU	Germany	B	Human	MPXV/Germany/2022/RKI468	2022	Homo sapiens	OP626106
OP626108	Wed Jun 26 18:51:23 CDT 2024	MPXV; 2; B_isolate MPXV/Germany/2022/RKI470	197140	OP626108	MPXV_OP626108	Virus_dsDNA_env; Poxviridae; Chordopoxvirinae; Orthopoxvirus; MPXV; 2; B	Monkeypox virus	Linear	OP626108 DEU 2022	West Af	3	2	Europe	DEU	Germany	B	Human	MPXV/Germany/2022/RKI470	2022	Homo sapiens	OP626108
OP626109	Wed Jun 26 18:51:23 CDT 2024	MPXV; 2; B_isolate MPXV/Germany/2022/RKI471	197140	OP626109	MPXV_OP626109	Virus_dsDNA_env; Poxviridae; Chordopoxvirinae; Orthopoxvirus; MPXV; 2; B	Monkeypox virus	Linear	OP626109 DEU 2022	West Af	3	2	Europe	DEU	Germany	B	Human	MPXV/Germany/2022/RKI471	2022	Homo sapiens	OP626109
OP626110	Wed Jun 26 18:51:23 CDT 2024	MPXV; 2; B_isolate MPXV/Germany/2022/RKI472	197140	OP626110	MPXV_OP626110	Virus_dsDNA_env; Poxviridae; Chordopoxvirinae; Orthopoxvirus; MPXV; 2; B	Monkeypox virus	Linear	OP626110 DEU 2022	West Af	3	2	Europe	DEU	Germany	B	Human	MPXV/Germany/2022/RKI472	2022	Homo sapiens	OP626110
OP626111	Wed Jun 26 18:51:23 CDT 2024	MPXV; 2; B_isolate MPXV/Germany/2022/RKI473	197140	OP626111	MPXV_OP626111	Virus_dsDNA_env; Poxviridae; Chordopoxvirinae; Orthopoxvirus; MPXV; 2; B	Monkeypox virus	Linear	OP626111 DEU 2022	West Af	3	2	Europe	DEU	Germany	B	Human	MPXV/Germany/2022/RKI473	2022	Homo sapiens	OP626111
OP626112	Wed Jun 26 18:51:23 CDT 2024	MPXV; 2; B_isolate MPXV/Germany/2022/RKI474	197140	OP626112	MPXV_OP626112	Virus_dsDNA_env; Poxviridae; Chordopoxvirinae; Orthopoxvirus; MPXV; 2; B	Monkeypox virus	Linear	OP626112 DEU 2022	West Af	3	2	Europe	DEU	Germany	B	Human	MPXV/Germany/2022/RKI474	2022	Homo sapiens	OP626112
OP626113	Wed Jun 26 18:51:23 CDT 2024	MPXV; 2; B_isolate MPXV/Germany/2022/RKI475	197140	OP626113	MPXV_OP626113	Virus_dsDNA_env; Poxviridae; Chordopoxvirinae; Orthopoxvirus; MPXV; 2; B	Monkeypox virus	Linear	OP626113 DEU 2022	West Af	3	2	Europe	DEU	Germany	B	Human	MPXV/Germany/2022/RKI475	2022	Homo sapiens	OP626113
OP626114	Wed Jun 26 18:51:23 CDT 2024	MPXV; 2; B_isolate MPXV/Germany/2022/RKI476	197140	OP626114	MPXV_OP626114	Virus_dsDNA_env; Poxviridae; Chordopoxvirinae; Orthopoxvirus; MPXV; 2; B	Monkeypox virus	Linear	OP626114 DEU 2022	West Af	3	2	Europe	DEU	Germany	B	Human	MPXV/Germany/2022/RKI476	2022	Homo sapiens	OP626114
OP626115	Wed Jun 26 18:51:23 CDT 2024	MPXV; 2; B_isolate MPXV/Germany/2022/RKI477	197140	OP626115	MPXV_OP626115	Virus_dsDNA_env; Poxviridae; Chordopoxvirinae; Orthopoxvirus; MPXV; 2; B	Monkeypox virus	Linear	OP626115 DEU 2022	West Af	3	2	Europe	DEU	Germany	B	Human	MPXV/Germany/2022/RKI477	2022	Homo sapiens	OP626115
OP626116	Wed Jun 26 18:51:23 CDT 2024	MPXV; 2; B_isolate MPXV/Germany/2022/RKI478	197140	OP626116	MPXV_OP626116	Virus_dsDNA_env; Poxviridae; Chordopoxvirinae; Orthopoxvirus; MPXV; 2; B	Monkeypox virus	Linear	OP626116 DEU 2022	West Af	3	2	Europe	DEU	Germany	B	Human	MPXV/Germany/2022/RKI478	2022	Homo sapiens	OP626116
OP626117	Wed Jun 26 18:51:23 CDT 2024	MPXV; 2; B_isolate MPXV/Germany/2022/RKI479	197140	OP626117	MPXV_OP626117	Virus_dsDNA_env; Poxviridae; Chordopoxvirinae; Orthopoxvirus; MPXV; 2; B	Monkeypox virus	Linear	OP626117 DEU 2022	West Af	3	2	Europe	DEU	Germany	B	Human	MPXV/Germany/2022/RKI479	2022	Homo sapiens	OP626117
OP626118	Wed Jun 26 18:51:23 CDT 2024	MPXV; 2; B_isolate MPXV/Germany/2022/RKI480	197140	OP626118	MPXV_OP626118	Virus_dsDNA_env; Poxviridae; Chordopoxvirinae; Orthopoxvirus; MPXV; 2; B	Monkeypox virus	Linear	OP626118 DEU 2022	West Af	3	2	Europe	DEU	Germany	B	Human	MPXV/Germany/2022/RKI480	2022	Homo sapiens	OP626118
OP626121	Wed Jun 26 18:51:23 CDT 2024	MPXV; 2; B_isolate MPXV/Germany/2022/RKI483	197140	OP626121	MPXV_OP626121	Virus_dsDNA_env; Poxviridae; Chordopoxvirinae; Orthopoxvirus; MPXV; 2; B	Monkeypox virus	Linear	OP626121 DEU 2022	West Af	3	2	Europe	DEU	Germany	B	Human	MPXV/Germany/2022/RKI483	2022	Homo sapiens	OP626121
OP626122	Wed Jun 26 18:51:23 CDT 2024	MPXV; 2; B_isolate MPXV/Germany/2022/RKI484	197140	OP626122	MPXV_OP626122	Virus_dsDNA_env; Poxviridae; Chordopoxvirinae; Orthopoxvirus; MPXV; 2; B	Monkeypox virus	Linear	OP626122 DEU 2022	West Af	3	2	Europe	DEU	Germany	B	Human	MPXV/Germany/2022/RKI484	2022	Homo sapiens	OP626122
OP626123	Wed Jun 26 18:51:23 CDT 2024	MPXV; 2; B_isolate MPXV/Germany/2022/RKI485	197140	OP626123	MPXV_OP626123	Virus_dsDNA_env; Poxviridae; Chordopoxvirinae; Orthopoxvirus; MPXV; 2; B	Monkeypox virus	Linear	OP626123 DEU 2022	West Af	3	2	Europe	DEU	Germany	B	Human	MPXV/Germany/2022/RKI485	2022	Homo sapiens	OP626123
OP626124	Wed Jun 26 18:51:23 CDT 2024	MPXV; 2; B_isolate MPXV/Germany/2022/RKI486	197140	OP626124	MPXV_OP626124	Virus_dsDNA_env; Poxviridae; Chordopoxvirinae; Orthopoxvirus; MPXV; 2; B	Monkeypox virus	Linear	OP626124 DEU 2022	West Af	3	2	Europe	DEU	Germany	B	Human	MPXV/Germany/2022/RKI486	2022	Homo sapiens	OP626124
OP626125	Wed Jun 26 18:51:23 CDT 2024	MPXV; 2; B_isolate MPXV/Germany/2022/RKI487	197140	OP626125	MPXV_OP626125	Virus_dsDNA_env; Poxviridae; Chordopoxvirinae; Orthopoxvirus; MPXV; 2; B	Monkeypox virus	Linear	OP626125 DEU 2022	West Af	3	2	Europe	DEU	Germany	B	Human	MPXV/Germany/2022/RKI487	2022	Homo sapiens	OP626125
OP626126	Wed Jun 26 18:51:23 CDT 2024	MPXV; 2; B_isolate MPXV/Germany/2022/RKI488	197140	OP626126	MPXV_OP626126	Virus_dsDNA_env; Poxviridae; Chordopoxvirinae; Orthopoxvirus; MPXV; 2; B	Monkeypox virus	Linear	OP626126 DEU 2022	West Af	3	2	Europe	DEU	Germany	B	Human	MPXV/Germany/2022/RKI488	2022	Homo sapiens	OP626126
OP626127	Wed Jun 26 18:51:23 CDT 2024	MPXV; 2; B_isolate MPXV/Germany/2022/RKI489	197140	OP626127	MPXV_OP626127	Virus_dsDNA_env; Poxviridae; Chordopoxvirinae; Orthopoxvirus; MPXV; 2; B	Monkeypox virus	Linear	OP626127 DEU 2022	West Af	3	2	Europe	DEU	Germany	B	Human	MPXV/Germany/2022/RKI489	2022	Homo sapiens	OP626127
OP626128	Wed Jun 26 18:51:23 CDT 2024	MPXV; 2; B_isolate MPXV/Germany/2022/RKI490	197140	OP626128	MPXV_OP626128	Virus_dsDNA_env; Poxviridae; Chordopoxvirinae; Orthopoxvirus; MPXV; 2; B	Monkeypox virus	Linear	OP626128 DEU 2022	West Af	3	2	Europe	DEU	Germany	B	Human	MPXV/Germany/2022/RKI490	2022	Homo sapiens	OP626128
OP626130	Wed Jun 26 18:51:23 CDT 2024	MPXV; 2; B_isolate MPXV/Germany/2022/RKI492	197140	OP626130	MPXV_OP626130	Virus_dsDNA_env; Poxviridae; Chordopoxvirinae; Orthopoxvirus; MPXV; 2; B	Monkeypox virus	Linear	OP626130 DEU 2022	West Af	3	2	Europe	DEU	Germany	B	Human	MPXV/Germany/2022/RKI492	2022	Homo sapiens	OP626130
OP626132	Wed Jun 26 18:51:23 CDT 2024	MPXV; 2; B_isolate MPXV/Germany/2022/RKI494	197140	OP626132	MPXV_OP626132	Virus_dsDNA_env; Poxviridae; Chordopoxvirinae; Orthopoxvirus; MPXV; 2; B	Monkeypox virus	Linear	OP626132 DEU 2022	West Af	3	2	Europe	DEU	Germany	B	Human	MPXV/Germany/2022/RKI494	2022	Homo sapiens	OP626132
OP626133	Wed Jun 26 18:51:23 CDT 2024	MPXV; 2; B_isolate MPXV/Germany/2022/RKI495	197140	OP626133	MPXV_OP626133	Virus_dsDNA_env; Poxviridae; Chordopoxvirinae; Orthopoxvirus; MPXV; 2; B	Monkeypox virus	Linear	OP626133 DEU 2022	West Af	3	2	Europe	DEU	Germany	B	Human	MPXV/Germany/2022/RKI495	2022	Homo sapiens	OP626133
OP626134	Wed Jun 26 18:51:23 CDT 2024	MPXV; 2; B_isolate MPXV/Germany/2022/RKI500	197140	OP626134	MPXV_OP626134	Virus_dsDNA_env; Poxviridae; Chordopoxvirinae; Orthopoxvirus; MPXV; 2; B	Monkeypox virus	Linear	OP626134 DEU 2022	West Af	3	2	Europe	DEU	Germany	B	Human	MPXV/Germany/2022/RKI500	2022	Homo sapiens	OP626134
OP626135	Wed Jun 26 18:51:23 CDT 2024	MPXV; 2; B_isolate MPXV/Germany/2022/RKI496	197139	OP626135	MPXV_OP626135	Virus_dsDNA_env; Poxviridae; Chordopoxvirinae; Orthopoxvirus; MPXV; 2; B	Monkeypox virus	Linear	OP626135 DEU 2022	West Af	3	2	Europe	DEU	Germany	B	Human	MPXV/Germany/2022/RKI496	2022	Homo sapiens	OP626135
OP626136	Wed Jun 26 18:51:23 CDT 2024	MPXV; 2; B_isolate MPXV/Germany/2022/RKI497	197140	OP626136	MPXV_OP626136	Virus_dsDNA_env; Poxviridae; Chordopoxvirinae; Orthopoxvirus; MPXV; 2; B	Monkeypox virus	Linear	OP626136 DEU 2022	West Af	3	2	Europe	DEU	Germany	B	Human	MPXV/Germany/2022/RKI497	2022	Homo sapiens	OP626136
OP626137	Wed Jun 26 18:51:23 CDT 2024	MPXV; 2; B_isolate MPXV/Germany/2022/RKI498	197140	OP626137	MPXV_OP626137	Virus_dsDNA_env; Poxviridae; Chordopoxvirinae; Orthopoxvirus; MPXV; 2; B	Monkeypox virus	Linear	OP626137 DEU 2022	West Af	3	2	Europe	DEU	Germany	B	Human	MPXV/Germany/2022/RKI498	2022	Homo sapiens	OP626137
OP626138	Wed Jun 26 18:51:23 CDT 2024	MPXV; 2; B_isolate MPXV/Germany/2022/RKI499	197140	OP626138	MPXV_OP626138	Virus_dsDNA_env; Poxviridae; Chordopoxvirinae; Orthopoxvirus; MPXV; 2; B	Monkeypox virus	Linear	OP626138 DEU 2022	West Af	3	2	Europe	DEU	Germany	B	Human	MPXV/Germany/2022/RKI499	2022	Homo sapiens	OP626138
OP626139	Wed Jun 26 18:51:23 CDT 2024	MPXV; 2; B_isolate MPXV/Germany/2022/RKI501	197140	OP626139	MPXV_OP626139	Virus_dsDNA_env; Poxviridae; Chordopoxvirinae; Orthopoxvirus; MPXV; 2; B	Monkeypox virus	Linear	OP626139 DEU 2022	West Af	3	2	Europe	DEU	Germany	B	Human	MPXV/Germany/2022/RKI501	2022	Homo sapiens	OP626139
OP650027	Wed Jun 26 18:51:23 CDT 2024	MPXV; 2; B_isolate MPXV/USA/WA-UW-082786/2022	196292	OP650027	MPXV_OP650027	Virus_dsDNA_env; Poxviridae; Chordopoxvirinae; Orthopoxvirus; MPXV; 2; B	Monkeypox virus	Linear	OP650027 USA 2022	West Af	3	2	N America	USA	USA: WA	B	Human	MPXV/USA/WA-UW-082786/2022	2022	Homo sapiens	OP650027
OP650029	Wed Jun 26 18:51:23 CDT 2024	MPXV; 2; B_isolate MPXV22/USA-OK-81	197199	OP650029	MPXV_OP650029	Virus_dsDNA_env; Poxviridae; Chordopoxvirinae; Orthopoxvirus; MPXV; 2; B	Monkeypox virus	Linear	OP650029 USA 2022	West Af	3	2	N America	USA	USA: OK	B	Human	MPXV22/USA-OK-81	2022	Homo sapiens	OP650029
OP650030	Wed Jun 26 18:51:23 CDT 2024	MPXV; 2; B_isolate MPXV22/USA-OK-270	197182	OP650030	MPXV_OP650030	Virus_dsDNA_env; Poxviridae; Chordopoxvirinae; Orthopoxvirus; MPXV; 2; B	Monkeypox virus	Linear	OP650030 USA 2022	West Af	3	2	N America	USA	USA: OK	B	Human	MPXV22/USA-OK-270	2022	Homo sapiens	OP650030
OP650031	Wed Jun 26 18:51:23 CDT 2024	MPXV; 2; B_isolate MPXV22/USA-OK-273	197199	OP650031	MPXV_OP650031	Virus_dsDNA_env; Poxviridae; Chordopoxvirinae; Orthopoxvirus; MPXV; 2; B	Monkeypox virus	Linear	OP650031 USA 2022	West Af	3	2	N America	USA	USA: OK	B	Human	MPXV22/USA-OK-273	2022	Homo sapiens	OP650031
OP650032	Wed Jun 26 18:51:23 CDT 2024	MPXV; 2; B_isolate MPXV22/USA-OK-277	197196	OP650032	MPXV_OP650032	Virus_dsDNA_env; Poxviridae; Chordopoxvirinae; Orthopoxvirus; MPXV; 2; B	Monkeypox virus	Linear	OP650032 USA 2022	West Af	3	2	N America	USA	USA: OK	B	Human	MPXV22/USA-OK-277	2022	Homo sapiens	OP650032
OP681772	Wed Jun 26 18:51:23 CDT 2024	MPXV; 2; B_isolate MPXV/USA/WA-UW-085088/2022	197205	OP681772	MPXV_OP681772	Virus_dsDNA_env; Poxviridae; Chordopoxvirinae; Orthopoxvirus; MPXV; 2; B	Monkeypox virus	Linear	OP681772 USA 2022	West Af	3	2	N America	USA	USA: WA	B	Human	MPXV/USA/WA-UW-085088/2022	2022	Homo sapiens	OP681772
OP681773	Wed Jun 26 18:51:23 CDT 2024	MPXV; 2; B_isolate MPXV/USA/WA-UW-091243/2022	197203	OP681773	MPXV_OP681773	Virus_dsDNA_env; Poxviridae; Chordopoxvirinae; Orthopoxvirus; MPXV; 2; B	Monkeypox virus	Linear	OP681773 USA 2022	West Af	3	2	N America	USA	USA: WA	B	Human	MPXV/USA/WA-UW-091243/2022	2022	Homo sapiens	OP681773
OP681774	Wed Jun 26 18:51:23 CDT 2024	MPXV; 2; B_isolate MPXV/USA/WA-UW-092889/2022	197195	OP681774	MPXV_OP681774	Virus_dsDNA_env; Poxviridae; Chordopoxvirinae; Orthopoxvirus; MPXV; 2; B	Monkeypox virus	Linear	OP681774 USA 2022	West Af	3	2	N America	USA	USA: WA	B	Human	MPXV/USA/WA-UW-092889/2022	2022	Homo sapiens	OP681774
OP681776	Wed Jun 26 18:51:23 CDT 2024	MPXV; 2; B_isolate MPXV/USA/WA-UW-096851/2022	193000	OP681776	MPXV_OP681776	Virus_dsDNA_env; Poxviridae; Chordopoxvirinae; Orthopoxvirus; MPXV; 2; B	Monkeypox virus	Linear	OP681776 USA 2022	West Af	3	2	N America	USA	USA: WA	B	Human	MPXV/USA/WA-UW-096851/2022	2022	Homo sapiens	OP681776
OP681777	Wed Jun 26 18:51:23 CDT 2024	MPXV; 2; B_isolate MPXV/USA/WA-UW-092113/2022	197207	OP681777	MPXV_OP681777	Virus_dsDNA_env; Poxviridae; Chordopoxvirinae; Orthopoxvirus; MPXV; 2; B	Monkeypox virus	Linear	OP681777 USA 2022	West Af	3	2	N America	USA	USA: WA	B	Human	MPXV/USA/WA-UW-092113/2022	2022	Homo sapiens	OP681777
OP687926	Wed Jun 26 18:51:23 CDT 2024	MPXV; 2; B_isolate MPXV_USA_2022_AZ0004	197164	OP687926	MPXV_OP687926	Virus_dsDNA_env; Poxviridae; Chordopoxvirinae; Orthopoxvirus; MPXV; 2; B	Monkeypox virus	Linear	OP687926 USA 2022	West Af	3	2	N America	USA	USA: AZ	B	Human	MPXV_USA_2022_AZ0004	2022	Homo sapiens	OP687926
OP687927	Wed Jun 26 18:51:23 CDT 2024	MPXV; 2; B_isolate MPXV_USA_2022_CA0036	197180	OP687927	MPXV_OP687927	Virus_dsDNA_env; Poxviridae; Chordopoxvirinae; Orthopoxvirus; MPXV; 2; B	Monkeypox virus	Linear	OP687927 USA 2022	West Af	3	2	N America	USA	USA: CA	B	Human	MPXV_USA_2022_CA0036	2022	Homo sapiens	OP687927
OP687928	Wed Jun 26 18:51:23 CDT 2024	MPXV; 2; B_isolate MPXV_USA_2022_CA0037	197173	OP687928	MPXV_OP687928	Virus_dsDNA_env; Poxviridae; Chordopoxvirinae; Orthopoxvirus; MPXV; 2; B	Monkeypox virus	Linear	OP687928 USA 2022	West Af	3	2	N America	USA	USA: CA	B	Human	MPXV_USA_2022_CA0037	2022	Homo sapiens	OP687928
OP687930	Wed Jun 26 18:51:23 CDT 2024	MPXV; 2; B_isolate MPXV_USA_2022_FL0022	197194	OP687930	MPXV_OP687930	Virus_dsDNA_env; Poxviridae; Chordopoxvirinae; Orthopoxvirus; MPXV; 2; B	Monkeypox virus	Linear	OP687930 USA 2022	West Af	3	2	N America	USA	USA: FL	B	Human	MPXV_USA_2022_FL0022	2022	Homo sapiens	OP687930
OP687931	Wed Jun 26 18:51:23 CDT 2024	MPXV; 2; B_isolate MPXV_USA_2022_FL0023	197209	OP687931	MPXV_OP687931	Virus_dsDNA_env; Poxviridae; Chordopoxvirinae; Orthopoxvirus; MPXV; 2; B	Monkeypox virus	Linear	OP687931 USA 2022	West Af	3	2	N America	USA	USA: FL	B	Human	MPXV_USA_2022_FL0023	2022	Homo sapiens	OP687931
OP687932	Wed Jun 26 18:51:23 CDT 2024	MPXV; 2; B_isolate MPXV_USA_2022_FL0024	197196	OP687932	MPXV_OP687932	Virus_dsDNA_env; Poxviridae; Chordopoxvirinae; Orthopoxvirus; MPXV; 2; B	Monkeypox virus	Linear	OP687932 USA 2022	West Af	3	2	N America	USA	USA: FL	B	Human	MPXV_USA_2022_FL0024	2022	Homo sapiens	OP687932
OP687933	Wed Jun 26 18:51:23 CDT 2024	MPXV; 2; B_isolate MPXV_USA_2022_MI0003	197169	OP687933	MPXV_OP687933	Virus_dsDNA_env; Poxviridae; Chordopoxvirinae; Orthopoxvirus; MPXV; 2; B	Monkeypox virus	Linear	OP687933 USA 2022	West Af	3	2	N America	USA	USA: MI	B	Human	MPXV_USA_2022_MI0003	2022	Homo sapiens	OP687933
OP687934	Wed Jun 26 18:51:23 CDT 2024	MPXV; 2; B_isolate MPXV_USA_2022_MN0007	197143	OP687934	MPXV_OP687934	Virus_dsDNA_env; Poxviridae; Chordopoxvirinae; Orthopoxvirus; MPXV; 2; B	Monkeypox virus	Linear	OP687934 USA 2022	West Af	3	2	N America	USA	USA: MN	B	Human	MPXV_USA_2022_MN0007	2022	Homo sapiens	OP687934
OP687935	Wed Jun 26 18:51:23 CDT 2024	MPXV; 2; B_isolate MPXV_USA_2022_NC0008	197175	OP687935	MPXV_OP687935	Virus_dsDNA_env; Poxviridae; Chordopoxvirinae; Orthopoxvirus; MPXV; 2; B	Monkeypox virus	Linear	OP687935 USA 2022	West Af	3	2	N America	USA	USA: NC	B	Human	MPXV_USA_2022_NC0008	2022	Homo sapiens	OP687935
OP687936	Wed Jun 26 18:51:23 CDT 2024	MPXV; 2; B_isolate MPXV_USA_2022_NC0009	197149	OP687936	MPXV_OP687936	Virus_dsDNA_env; Poxviridae; Chordopoxvirinae; Orthopoxvirus; MPXV; 2; B	Monkeypox virus	Linear	OP687936 USA 2022	West Af	3	2	N America	USA	USA: NC	B	Human	MPXV_USA_2022_NC0009	2022	Homo sapiens	OP687936
OP687937	Wed Jun 26 18:51:23 CDT 2024	MPXV; 2; B_isolate MPXV_USA_2022_NJ0004	197257	OP687937	MPXV_OP687937	Virus_dsDNA_env; Poxviridae; Chordopoxvirinae; Orthopoxvirus; MPXV; 2; B	Monkeypox virus	Linear	OP687937 USA 2022	West Af	3	2	N America	USA	USA: NJ	B	Human	MPXV_USA_2022_NJ0004	2022	Homo sapiens	OP687937
OP687938	Wed Jun 26 18:51:23 CDT 2024	MPXV; 2; B_isolate MPXV_USA_2022_NJ0005	197416	OP687938	MPXV_OP687938	Virus_dsDNA_env; Poxviridae; Chordopoxvirinae; Orthopoxvirus; MPXV; 2; B	Monkeypox virus	Linear	OP687938 USA 2022	West Af	3	2	N America	USA	USA: NJ	B	Human	MPXV_USA_2022_NJ0005	2022	Homo sapiens	OP687938
OP687939	Wed Jun 26 18:51:23 CDT 2024	MPXV; 2; B_isolate MPXV_USA_2022_NY0029	197217	OP687939	MPXV_OP687939	Virus_dsDNA_env; Poxviridae; Chordopoxvirinae; Orthopoxvirus; MPXV; 2; B	Monkeypox virus	Linear	OP687939 USA 2022	West Af	3	2	N America	USA	USA: NY	B	Human	MPXV_USA_2022_NY0029	2022	Homo sapiens	OP687939
OP687940	Wed Jun 26 18:51:23 CDT 2024	MPXV; 2; B_isolate MPXV_USA_2022_NY0030	197087	OP687940	MPXV_OP687940	Virus_dsDNA_env; Poxviridae; Chordopoxvirinae; Orthopoxvirus; MPXV; 2; B	Monkeypox virus	Linear	OP687940 USA 2022	West Af	3	2	N America	USA	USA: NY	B	Human	MPXV_USA_2022_NY0030	2022	Homo sapiens	OP687940
OP687941	Wed Jun 26 18:51:23 CDT 2024	MPXV; 2; B_isolate MPXV_USA_2022_NY0031	197109	OP687941	MPXV_OP687941	Virus_dsDNA_env; Poxviridae; Chordopoxvirinae; Orthopoxvirus; MPXV; 2; B	Monkeypox virus	Linear	OP687941 USA 2022	West Af	3	2	N America	USA	USA: NY	B	Human	MPXV_USA_2022_NY0031	2022	Homo sapiens	OP687941
OP687942	Wed Jun 26 18:51:23 CDT 2024	MPXV; 2; B_isolate MPXV_USA_2022_OH0003	197172	OP687942	MPXV_OP687942	Virus_dsDNA_env; Poxviridae; Chordopoxvirinae; Orthopoxvirus; MPXV; 2; B	Monkeypox virus	Linear	OP687942 USA 2022	West Af	3	2	N America	USA	USA: OH	B	Human	MPXV_USA_2022_OH0003	2022	Homo sapiens	OP687942
OP687943	Wed Jun 26 18:51:23 CDT 2024	MPXV; 2; B_isolate MPXV_USA_2022_RI0002	197189	OP687943	MPXV_OP687943	Virus_dsDNA_env; Poxviridae; Chordopoxvirinae; Orthopoxvirus; MPXV; 2; B	Monkeypox virus	Linear	OP687943 USA 2022	West Af	3	2	N America	USA	USA: RI	B	Human	MPXV_USA_2022_RI0002	2022	Homo sapiens	OP687943
OP687944	Wed Jun 26 18:51:23 CDT 2024	MPXV; 2; B_isolate MPXV_USA_2022_TX0021	197173	OP687944	MPXV_OP687944	Virus_dsDNA_env; Poxviridae; Chordopoxvirinae; Orthopoxvirus; MPXV; 2; B	Monkeypox virus	Linear	OP687944 USA 2022	West Af	3	2	N America	USA	USA: TX	B	Human	MPXV_USA_2022_TX0021	2022	Homo sapiens	OP687944
OP687945	Wed Jun 26 18:51:23 CDT 2024	MPXV; 2; B_isolate MPXV_USA_2022_TX0022	197238	OP687945	MPXV_OP687945	Virus_dsDNA_env; Poxviridae; Chordopoxvirinae; Orthopoxvirus; MPXV; 2; B	Monkeypox virus	Linear	OP687945 USA 2022	West Af	3	2	N America	USA	USA: TX	B	Human	MPXV_USA_2022_TX0022	2022	Homo sapiens	OP687945
OP687946	Wed Jun 26 18:51:23 CDT 2024	MPXV; 2; B_isolate MPXV_USA_2022_TX0023	197177	OP687946	MPXV_OP687946	Virus_dsDNA_env; Poxviridae; Chordopoxvirinae; Orthopoxvirus; MPXV; 2; B	Monkeypox virus	Linear	OP687946 USA 2022	West Af	3	2	N America	USA	USA: TX	B	Human	MPXV_USA_2022_TX0023	2022	Homo sapiens	OP687946
OP687947	Wed Jun 26 18:51:23 CDT 2024	MPXV; 2; B_isolate MPXV_USA_2022_TX0024	197194	OP687947	MPXV_OP687947	Virus_dsDNA_env; Poxviridae; Chordopoxvirinae; Orthopoxvirus; MPXV; 2; B	Monkeypox virus	Linear	OP687947 USA 2022	West Af	3	2	N America	USA	USA: TX	B	Human	MPXV_USA_2022_TX0024	2022	Homo sapiens	OP687947
OP687948	Wed Jun 26 18:51:23 CDT 2024	MPXV; 2; B_isolate MPXV_USA_2022_TX0025	197181	OP687948	MPXV_OP687948	Virus_dsDNA_env; Poxviridae; Chordopoxvirinae; Orthopoxvirus; MPXV; 2; B	Monkeypox virus	Linear	OP687948 USA 2022	West Af	3	2	N America	USA	USA: TX	B	Human	MPXV_USA_2022_TX0025	2022	Homo sapiens	OP687948
OP687949	Wed Jun 26 18:51:23 CDT 2024	MPXV; 2; B_isolate MPXV_USA_2022_TX0026	197170	OP687949	MPXV_OP687949	Virus_dsDNA_env; Poxviridae; Chordopoxvirinae; Orthopoxvirus; MPXV; 2; B	Monkeypox virus	Linear	OP687949 USA 2022	West Af	3	2	N America	USA	USA: TX	B	Human	MPXV_USA_2022_TX0026	2022	Homo sapiens	OP687949
OP689666	Wed Jun 26 18:51:23 CDT 2024	MPXV; 2; B_isolate MPXV/Germany/2022/RKI513	197140	OP689666	MPXV_OP689666	Virus_dsDNA_env; Poxviridae; Chordopoxvirinae; Orthopoxvirus; MPXV; 2; B	Monkeypox virus	Linear	OP689666 DEU 2022	West Af	3	2	Europe	DEU	Germany	B	Human	MPXV/Germany/2022/RKI513	2022	Homo sapiens	OP689666
OP689667	Wed Jun 26 18:51:23 CDT 2024	MPXV; 2; B_isolate MPXV/Germany/2022/RKI514	197140	OP689667	MPXV_OP689667	Virus_dsDNA_env; Poxviridae; Chordopoxvirinae; Orthopoxvirus; MPXV; 2; B	Monkeypox virus	Linear	OP689667 DEU 2022	West Af	3	2	Europe	DEU	Germany	B	Human	MPXV/Germany/2022/RKI514	2022	Homo sapiens	OP689667
OP689668	Wed Jun 26 18:51:23 CDT 2024	MPXV; 2; B_isolate MPXV/Germany/2022/RKI515	197140	OP689668	MPXV_OP689668	Virus_dsDNA_env; Poxviridae; Chordopoxvirinae; Orthopoxvirus; MPXV; 2; B	Monkeypox virus	Linear	OP689668 DEU 2022	West Af	3	2	Europe	DEU	Germany	B	Human	MPXV/Germany/2022/RKI515	2022	Homo sapiens	OP689668
OP689669	Wed Jun 26 18:51:23 CDT 2024	MPXV; 2; B_isolate MPXV/Germany/2022/RKI516	197140	OP689669	MPXV_OP689669	Virus_dsDNA_env; Poxviridae; Chordopoxvirinae; Orthopoxvirus; MPXV; 2; B	Monkeypox virus	Linear	OP689669 DEU 2022	West Af	3	2	Europe	DEU	Germany	B	Human	MPXV/Germany/2022/RKI516	2022	Homo sapiens	OP689669
OP689670	Wed Jun 26 18:51:23 CDT 2024	MPXV; 2; B_isolate MPXV/Germany/2022/RKI517	197140	OP689670	MPXV_OP689670	Virus_dsDNA_env; Poxviridae; Chordopoxvirinae; Orthopoxvirus; MPXV; 2; B	Monkeypox virus	Linear	OP689670 DEU 2022	West Af	3	2	Europe	DEU	Germany	B	Human	MPXV/Germany/2022/RKI517	2022	Homo sapiens	OP689670
OP689674	Wed Jun 26 18:51:23 CDT 2024	MPXV; 2; B_isolate MPXV/Germany/2022/RKI521	197140	OP689674	MPXV_OP689674	Virus_dsDNA_env; Poxviridae; Chordopoxvirinae; Orthopoxvirus; MPXV; 2; B	Monkeypox virus	Linear	OP689674 DEU 2022	West Af	3	2	Europe	DEU	Germany	B	Human	MPXV/Germany/2022/RKI521	2022	Homo sapiens	OP689674
OP689675	Wed Jun 26 18:51:23 CDT 2024	MPXV; 2; B_isolate MPXV/Germany/2022/RKI522	197140	OP689675	MPXV_OP689675	Virus_dsDNA_env; Poxviridae; Chordopoxvirinae; Orthopoxvirus; MPXV; 2; B	Monkeypox virus	Linear	OP689675 DEU 2022	West Af	3	2	Europe	DEU	Germany	B	Human	MPXV/Germany/2022/RKI522	2022	Homo sapiens	OP689675
OP689677	Wed Jun 26 18:51:23 CDT 2024	MPXV; 2; B_isolate MPXV/Germany/2022/RKI524	197140	OP689677	MPXV_OP689677	Virus_dsDNA_env; Poxviridae; Chordopoxvirinae; Orthopoxvirus; MPXV; 2; B	Monkeypox virus	Linear	OP689677 DEU 2022	West Af	3	2	Europe	DEU	Germany	B	Human	MPXV/Germany/2022/RKI524	2022	Homo sapiens	OP689677
OP689678	Wed Jun 26 18:51:23 CDT 2024	MPXV; 2; B_isolate MPXV/Germany/2022/RKI525	197141	OP689678	MPXV_OP689678	Virus_dsDNA_env; Poxviridae; Chordopoxvirinae; Orthopoxvirus; MPXV; 2; B	Monkeypox virus	Linear	OP689678 DEU 2022	West Af	3	2	Europe	DEU	Germany	B	Human	MPXV/Germany/2022/RKI525	2022	Homo sapiens	OP689678
OP689681	Wed Jun 26 18:51:23 CDT 2024	MPXV; 2; B_isolate MPXV/Germany/2022/RKI528	197140	OP689681	MPXV_OP689681	Virus_dsDNA_env; Poxviridae; Chordopoxvirinae; Orthopoxvirus; MPXV; 2; B	Monkeypox virus	Linear	OP689681 DEU 2022	West Af	3	2	Europe	DEU	Germany	B	Human	MPXV/Germany/2022/RKI528	2022	Homo sapiens	OP689681
OP689683	Wed Jun 26 18:51:23 CDT 2024	MPXV; 2; B_isolate MPXV/Germany/2022/RKI530	197141	OP689683	MPXV_OP689683	Virus_dsDNA_env; Poxviridae; Chordopoxvirinae; Orthopoxvirus; MPXV; 2; B	Monkeypox virus	Linear	OP689683 DEU 2022	West Af	3	2	Europe	DEU	Germany	B	Human	MPXV/Germany/2022/RKI530	2022	Homo sapiens	OP689683
OP689684	Wed Jun 26 18:51:23 CDT 2024	MPXV; 2; B_isolate MPXV/Germany/2022/RKI531	197139	OP689684	MPXV_OP689684	Virus_dsDNA_env; Poxviridae; Chordopoxvirinae; Orthopoxvirus; MPXV; 2; B	Monkeypox virus	Linear	OP689684 DEU 2022	West Af	3	2	Europe	DEU	Germany	B	Human	MPXV/Germany/2022/RKI531	2022	Homo sapiens	OP689684
OP689685	Wed Jun 26 18:51:23 CDT 2024	MPXV; 2; B_isolate MPXV/Germany/2022/RKI533	197139	OP689685	MPXV_OP689685	Virus_dsDNA_env; Poxviridae; Chordopoxvirinae; Orthopoxvirus; MPXV; 2; B	Monkeypox virus	Linear	OP689685 DEU 2022	West Af	3	2	Europe	DEU	Germany	B	Human	MPXV/Germany/2022/RKI533	2022	Homo sapiens	OP689685
OP689687	Wed Jun 26 18:51:23 CDT 2024	MPXV; 2; B_isolate MPXV/Germany/2022/RKI534	197139	OP689687	MPXV_OP689687	Virus_dsDNA_env; Poxviridae; Chordopoxvirinae; Orthopoxvirus; MPXV; 2; B	Monkeypox virus	Linear	OP689687 DEU 2022	West Af	3	2	Europe	DEU	Germany	B	Human	MPXV/Germany/2022/RKI534	2022	Homo sapiens	OP689687
OP696838	Wed Jun 26 18:51:23 CDT 2024	MPXV; 2; B_isolate MPXV/Germany/2022/RKI335	191167	OP696838	MPXV_OP696838	Virus_dsDNA_env; Poxviridae; Chordopoxvirinae; Orthopoxvirus; MPXV; 2; B	Monkeypox virus	Linear	OP696838 DEU 2022	West Af	3	2	Europe	DEU	Germany	B	Human	MPXV/Germany/2022/RKI335	2022	Homo sapiens	OP696838
OP696839	Wed Jun 26 18:51:23 CDT 2024	MPXV; 2; B_isolate MPXV/Germany/2022/RKI336	185851	OP696839	MPXV_OP696839	Virus_dsDNA_env; Poxviridae; Chordopoxvirinae; Orthopoxvirus; MPXV; 2; B	Monkeypox virus	Linear	OP696839 DEU 2022	West Af	3	2	Europe	DEU	Germany	B	Human	MPXV/Germany/2022/RKI336	2022	Homo sapiens	OP696839
OP696840	Wed Jun 26 18:51:23 CDT 2024	MPXV; 2; B_isolate MPXV/Germany/2022/RKI337	185499	OP696840	MPXV_OP696840	Virus_dsDNA_env; Poxviridae; Chordopoxvirinae; Orthopoxvirus; MPXV; 2; B	Monkeypox virus	Linear	OP696840 DEU 2022	West Af	3	2	Europe	DEU	Germany	B	Human	MPXV/Germany/2022/RKI337	2022	Homo sapiens	OP696840
OP696841	Wed Jun 26 18:51:23 CDT 2024	MPXV; 2; B_isolate MPXV/Germany/2022/RKI338	194417	OP696841	MPXV_OP696841	Virus_dsDNA_env; Poxviridae; Chordopoxvirinae; Orthopoxvirus; MPXV; 2; B	Monkeypox virus	Linear	OP696841 DEU 2022	West Af	3	2	Europe	DEU	Germany	B	Human	MPXV/Germany/2022/RKI338	2022	Homo sapiens	OP696841
OP696842	Wed Jun 26 18:51:23 CDT 2024	MPXV; 2; B_isolate MPXV/Germany/2022/RKI339	208626	OP696842	MPXV_OP696842	Virus_dsDNA_env; Poxviridae; Chordopoxvirinae; Orthopoxvirus; MPXV; 2; B	Monkeypox virus	Linear	OP696842 DEU 2022	West Af	3	2	Europe	DEU	Germany	B	Human	MPXV/Germany/2022/RKI339	2022	Homo sapiens	OP696842
OP715788	Wed Jun 26 18:51:23 CDT 2024	MPXV; 2; B_isolate MPXV/USA/WA-UW-091072/2022	197200	OP715788	MPXV_OP715788	Virus_dsDNA_env; Poxviridae; Chordopoxvirinae; Orthopoxvirus; MPXV; 2; B	Monkeypox virus	Linear	OP715788 USA 2022	West Af	3	2	N America	USA	USA: WA	B	Human	MPXV/USA/WA-UW-091072/2022	2022	Homo sapiens	OP715788
OP715789	Wed Jun 26 18:51:23 CDT 2024	MPXV; 2; B_isolate MPXV/USA/WA-UW-095695/2022	197207	OP715789	MPXV_OP715789	Virus_dsDNA_env; Poxviridae; Chordopoxvirinae; Orthopoxvirus; MPXV; 2; B	Monkeypox virus	Linear	OP715789 USA 2022	West Af	3	2	N America	USA	USA: WA	B	Human	MPXV/USA/WA-UW-095695/2022	2022	Homo sapiens	OP715789
OP715818	Wed Jun 26 18:51:23 CDT 2024	MPXV; 2; B_isolate MPXV/Germany/2022/RKI538	197140	OP715818	MPXV_OP715818	Virus_dsDNA_env; Poxviridae; Chordopoxvirinae; Orthopoxvirus; MPXV; 2; B	Monkeypox virus	Linear	OP715818 DEU 2022	West Af	3	2	Europe	DEU	Germany	B	Human	MPXV/Germany/2022/RKI538	2022	Homo sapiens	OP715818
OP715819	Wed Jun 26 18:51:23 CDT 2024	MPXV; 2; B_isolate MPXV/Germany/2022/RKI539	197140	OP715819	MPXV_OP715819	Virus_dsDNA_env; Poxviridae; Chordopoxvirinae; Orthopoxvirus; MPXV; 2; B	Monkeypox virus	Linear	OP715819 DEU 2022	West Af	3	2	Europe	DEU	Germany	B	Human	MPXV/Germany/2022/RKI539	2022	Homo sapiens	OP715819
OP715820	Wed Jun 26 18:51:23 CDT 2024	MPXV; 2; B_isolate MPXV/Germany/2022/RKI540	197140	OP715820	MPXV_OP715820	Virus_dsDNA_env; Poxviridae; Chordopoxvirinae; Orthopoxvirus; MPXV; 2; B	Monkeypox virus	Linear	OP715820 DEU 2022	West Af	3	2	Europe	DEU	Germany	B	Human	MPXV/Germany/2022/RKI540	2022	Homo sapiens	OP715820
OP715821	Wed Jun 26 18:51:23 CDT 2024	MPXV; 2; B_isolate MPXV/Germany/2022/RKI541	197141	OP715821	MPXV_OP715821	Virus_dsDNA_env; Poxviridae; Chordopoxvirinae; Orthopoxvirus; MPXV; 2; B	Monkeypox virus	Linear	OP715821 DEU 2022	West Af	3	2	Europe	DEU	Germany	B	Human	MPXV/Germany/2022/RKI541	2022	Homo sapiens	OP715821
OP715822	Wed Jun 26 18:51:23 CDT 2024	MPXV; 2; B_isolate MPXV/Germany/2022/RKI542	197140	OP715822	MPXV_OP715822	Virus_dsDNA_env; Poxviridae; Chordopoxvirinae; Orthopoxvirus; MPXV; 2; B	Monkeypox virus	Linear	OP715822 DEU 2022	West Af	3	2	Europe	DEU	Germany	B	Human	MPXV/Germany/2022/RKI542	2022	Homo sapiens	OP715822
OP715823	Wed Jun 26 18:51:23 CDT 2024	MPXV; 2; B_isolate MPXV/Germany/2022/RKI543	197141	OP715823	MPXV_OP715823	Virus_dsDNA_env; Poxviridae; Chordopoxvirinae; Orthopoxvirus; MPXV; 2; B	Monkeypox virus	Linear	OP715823 DEU 2022	West Af	3	2	Europe	DEU	Germany	B	Human	MPXV/Germany/2022/RKI543	2022	Homo sapiens	OP715823
OP715825	Wed Jun 26 18:51:23 CDT 2024	MPXV; 2; B_isolate MPXV/Germany/2022/RKI545	197140	OP715825	MPXV_OP715825	Virus_dsDNA_env; Poxviridae; Chordopoxvirinae; Orthopoxvirus; MPXV; 2; B	Monkeypox virus	Linear	OP715825 DEU 2022	West Af	3	2	Europe	DEU	Germany	B	Human	MPXV/Germany/2022/RKI545	2022	Homo sapiens	OP715825
OP715829	Wed Jun 26 18:51:23 CDT 2024	MPXV; 2; B_isolate MPXV/Germany/2022/RKI549	197140	OP715829	MPXV_OP715829	Virus_dsDNA_env; Poxviridae; Chordopoxvirinae; Orthopoxvirus; MPXV; 2; B	Monkeypox virus	Linear	OP715829 DEU 2022	West Af	3	2	Europe	DEU	Germany	B	Human	MPXV/Germany/2022/RKI549	2022	Homo sapiens	OP715829
OP715831	Wed Jun 26 18:51:23 CDT 2024	MPXV; 2; B_isolate MPXV/Germany/2022/RKI551	197141	OP715831	MPXV_OP715831	Virus_dsDNA_env; Poxviridae; Chordopoxvirinae; Orthopoxvirus; MPXV; 2; B	Monkeypox virus	Linear	OP715831 DEU 2022	West Af	3	2	Europe	DEU	Germany	B	Human	MPXV/Germany/2022/RKI551	2022	Homo sapiens	OP715831
OP715833	Wed Jun 26 18:51:23 CDT 2024	MPXV; 2; B_isolate MPXV/Germany/2022/RKI553	197141	OP715833	MPXV_OP715833	Virus_dsDNA_env; Poxviridae; Chordopoxvirinae; Orthopoxvirus; MPXV; 2; B	Monkeypox virus	Linear	OP715833 DEU 2022	West Af	3	2	Europe	DEU	Germany	B	Human	MPXV/Germany/2022/RKI553	2022	Homo sapiens	OP715833
OP715834	Wed Jun 26 18:51:23 CDT 2024	MPXV; 2; B_isolate MPXV/Germany/2022/RKI554	197140	OP715834	MPXV_OP715834	Virus_dsDNA_env; Poxviridae; Chordopoxvirinae; Orthopoxvirus; MPXV; 2; B	Monkeypox virus	Linear	OP715834 DEU 2022	West Af	3	2	Europe	DEU	Germany	B	Human	MPXV/Germany/2022/RKI554	2022	Homo sapiens	OP715834
OP715835	Wed Jun 26 18:51:23 CDT 2024	MPXV; 2; B_isolate MPXV/Germany/2022/RKI555	197140	OP715835	MPXV_OP715835	Virus_dsDNA_env; Poxviridae; Chordopoxvirinae; Orthopoxvirus; MPXV; 2; B	Monkeypox virus	Linear	OP715835 DEU 2022	West Af	3	2	Europe	DEU	Germany	B	Human	MPXV/Germany/2022/RKI555	2022	Homo sapiens	OP715835
OP727820	Wed Jun 26 18:51:23 CDT 2024	MPXV; 2; B_isolate PEV_case	196666	OP727820	MPXV_OP727820	Virus_dsDNA_env; Poxviridae; Chordopoxvirinae; Orthopoxvirus; MPXV; 2; B	Monkeypox virus	Linear	OP727820 BEL 2022	West Af	3	2	Europe	BEL	Belgium	B	Human	PEV_case	2022	Homo sapiens	OP727820
OP727823	Wed Jun 26 18:51:23 CDT 2024	MPXV; 2; B_isolate PrEV_case_4	197023	OP727823	MPXV_OP727823	Virus_dsDNA_env; Poxviridae; Chordopoxvirinae; Orthopoxvirus; MPXV; 2; B	Monkeypox virus	Linear	OP727823 BEL 2022	West Af	3	2	Europe	BEL	Belgium	B	Human	PrEV_case_4	2022	Homo sapiens	OP727823
OP743951	Wed Jun 26 18:51:23 CDT 2024	MPXV; 2; B_isolate MPXV/USA/WA-UW-077466/2022	197207	OP743951	MPXV_OP743951	Virus_dsDNA_env; Poxviridae; Chordopoxvirinae; Orthopoxvirus; MPXV; 2; B	Monkeypox virus	Linear	OP743951 USA 2022	West Af	3	2	N America	USA	USA: WA	B	Human	MPXV/USA/WA-UW-077466/2022	2022	Homo sapiens	OP743951
OP743952	Wed Jun 26 18:51:23 CDT 2024	MPXV; 2; B_isolate MPXV/USA/WA-UW-081100/2022	197205	OP743952	MPXV_OP743952	Virus_dsDNA_env; Poxviridae; Chordopoxvirinae; Orthopoxvirus; MPXV; 2; B	Monkeypox virus	Linear	OP743952 USA 2022	West Af	3	2	N America	USA	USA: WA	B	Human	MPXV/USA/WA-UW-081100/2022	2022	Homo sapiens	OP743952
OP743953	Wed Jun 26 18:51:23 CDT 2024	MPXV; 2; B_isolate MPXV/USA/WA-UW-089563/2022	197205	OP743953	MPXV_OP743953	Virus_dsDNA_env; Poxviridae; Chordopoxvirinae; Orthopoxvirus; MPXV; 2; B	Monkeypox virus	Linear	OP743953 USA 2022	West Af	3	2	N America	USA	USA: WA	B	Human	MPXV/USA/WA-UW-089563/2022	2022	Homo sapiens	OP743953
OP743954	Wed Jun 26 18:51:23 CDT 2024	MPXV; 2; B_isolate MPXV/USA/WA-UW-082153/2022	197205	OP743954	MPXV_OP743954	Virus_dsDNA_env; Poxviridae; Chordopoxvirinae; Orthopoxvirus; MPXV; 2; B	Monkeypox virus	Linear	OP743954 USA 2022	West Af	3	2	N America	USA	USA: WA	B	Human	MPXV/USA/WA-UW-082153/2022	2022	Homo sapiens	OP743954
OP743955	Wed Jun 26 18:51:23 CDT 2024	MPXV; 2; B_isolate MPXV/USA/WA-UW-089756/2022	197203	OP743955	MPXV_OP743955	Virus_dsDNA_env; Poxviridae; Chordopoxvirinae; Orthopoxvirus; MPXV; 2; B	Monkeypox virus	Linear	OP743955 USA 2022	West Af	3	2	N America	USA	USA: WA	B	Human	MPXV/USA/WA-UW-089756/2022	2022	Homo sapiens	OP743955
OP743956	Wed Jun 26 18:51:23 CDT 2024	MPXV; 2; B_isolate MPXV/USA/OH-UW-083520/2022	197202	OP743956	MPXV_OP743956	Virus_dsDNA_env; Poxviridae; Chordopoxvirinae; Orthopoxvirus; MPXV; 2; B	Monkeypox virus	Linear	OP743956 USA 2022	West Af	3	2	N America	USA	USA: OH	B	Human	MPXV/USA/OH-UW-083520/2022	2022	Homo sapiens	OP743956
OP743957	Wed Jun 26 18:51:23 CDT 2024	MPXV; 2; B_isolate MPXV/USA/OH-UW-080634/2022	197205	OP743957	MPXV_OP743957	Virus_dsDNA_env; Poxviridae; Chordopoxvirinae; Orthopoxvirus; MPXV; 2; B	Monkeypox virus	Linear	OP743957 USA 2022	West Af	3	2	N America	USA	USA: OH	B	Human	MPXV/USA/OH-UW-080634/2022	2022	Homo sapiens	OP743957
OP743958	Wed Jun 26 18:51:23 CDT 2024	MPXV; 2; B_isolate MPXV/USA/WA-UW-089473/2022	197205	OP743958	MPXV_OP743958	Virus_dsDNA_env; Poxviridae; Chordopoxvirinae; Orthopoxvirus; MPXV; 2; B	Monkeypox virus	Linear	OP743958 USA 2022	West Af	3	2	N America	USA	USA: WA	B	Human	MPXV/USA/WA-UW-089473/2022	2022	Homo sapiens	OP743958
OP743959	Wed Jun 26 18:51:23 CDT 2024	MPXV; 2; B_isolate MPXV/USA/WA-UW-089051/2022	197205	OP743959	MPXV_OP743959	Virus_dsDNA_env; Poxviridae; Chordopoxvirinae; Orthopoxvirus; MPXV; 2; B	Monkeypox virus	Linear	OP743959 USA 2022	West Af	3	2	N America	USA	USA: WA	B	Human	MPXV/USA/WA-UW-089051/2022	2022	Homo sapiens	OP743959
OP743960	Wed Jun 26 18:51:23 CDT 2024	MPXV; 2; B_isolate MPXV/USA/WA-UW-085326/2022	197205	OP743960	MPXV_OP743960	Virus_dsDNA_env; Poxviridae; Chordopoxvirinae; Orthopoxvirus; MPXV; 2; B	Monkeypox virus	Linear	OP743960 USA 2022	West Af	3	2	N America	USA	USA: WA	B	Human	MPXV/USA/WA-UW-085326/2022	2022	Homo sapiens	OP743960
OP743961	Wed Jun 26 18:51:23 CDT 2024	MPXV; 2; B_isolate MPXV/USA/WA-UW-086295/2022	197205	OP743961	MPXV_OP743961	Virus_dsDNA_env; Poxviridae; Chordopoxvirinae; Orthopoxvirus; MPXV; 2; B	Monkeypox virus	Linear	OP743961 USA 2022	West Af	3	2	N America	USA	USA: WA	B	Human	MPXV/USA/WA-UW-086295/2022	2022	Homo sapiens	OP743961
OP743962	Wed Jun 26 18:51:23 CDT 2024	MPXV; 2; B_isolate MPXV/USA/WA-UW-088248/2022	197201	OP743962	MPXV_OP743962	Virus_dsDNA_env; Poxviridae; Chordopoxvirinae; Orthopoxvirus; MPXV; 2; B	Monkeypox virus	Linear	OP743962 USA 2022	West Af	3	2	N America	USA	USA: WA	B	Human	MPXV/USA/WA-UW-088248/2022	2022	Homo sapiens	OP743962
OP743964	Wed Jun 26 18:51:23 CDT 2024	MPXV; 2; B_isolate MPXV/USA/WA-UW-098738/2022	197207	OP743964	MPXV_OP743964	Virus_dsDNA_env; Poxviridae; Chordopoxvirinae; Orthopoxvirus; MPXV; 2; B	Monkeypox virus	Linear	OP743964 USA 2022	West Af	3	2	N America	USA	USA: WA	B	Human	MPXV/USA/WA-UW-098738/2022	2022	Homo sapiens	OP743964
OP743965	Wed Jun 26 18:51:23 CDT 2024	MPXV; 2; B_isolate MPXV/USA/WA-UW-090263/2022	197207	OP743965	MPXV_OP743965	Virus_dsDNA_env; Poxviridae; Chordopoxvirinae; Orthopoxvirus; MPXV; 2; B	Monkeypox virus	Linear	OP743965 USA 2022	West Af	3	2	N America	USA	USA: WA	B	Human	MPXV/USA/WA-UW-090263/2022	2022	Homo sapiens	OP743965
OP743966	Wed Jun 26 18:51:23 CDT 2024	MPXV; 2; B_isolate MPXV/USA/WA-UW-099102/2022	197203	OP743966	MPXV_OP743966	Virus_dsDNA_env; Poxviridae; Chordopoxvirinae; Orthopoxvirus; MPXV; 2; B	Monkeypox virus	Linear	OP743966 USA 2022	West Af	3	2	N America	USA	USA: WA	B	Human	MPXV/USA/WA-UW-099102/2022	2022	Homo sapiens	OP743966
OP743967	Wed Jun 26 18:51:23 CDT 2024	MPXV; 2; B_isolate MPXV/USA/WA-UW-092798/2022	197205	OP743967	MPXV_OP743967	Virus_dsDNA_env; Poxviridae; Chordopoxvirinae; Orthopoxvirus; MPXV; 2; B	Monkeypox virus	Linear	OP743967 USA 2022	West Af	3	2	N America	USA	USA: WA	B	Human	MPXV/USA/WA-UW-092798/2022	2022	Homo sapiens	OP743967
OP743968	Wed Jun 26 18:51:23 CDT 2024	MPXV; 2; B_isolate MPXV/USA/WA-UW-099479/2022	197207	OP743968	MPXV_OP743968	Virus_dsDNA_env; Poxviridae; Chordopoxvirinae; Orthopoxvirus; MPXV; 2; B	Monkeypox virus	Linear	OP743968 USA 2022	West Af	3	2	N America	USA	USA: WA	B	Human	MPXV/USA/WA-UW-099479/2022	2022	Homo sapiens	OP743968
OP743969	Wed Jun 26 18:51:23 CDT 2024	MPXV; 2; B_isolate MPXV/USA/WA-UW-099881/2022	197205	OP743969	MPXV_OP743969	Virus_dsDNA_env; Poxviridae; Chordopoxvirinae; Orthopoxvirus; MPXV; 2; B	Monkeypox virus	Linear	OP743969 USA 2022	West Af	3	2	N America	USA	USA: WA	B	Human	MPXV/USA/WA-UW-099881/2022	2022	Homo sapiens	OP743969
OP743970	Wed Jun 26 18:51:23 CDT 2024	MPXV; 2; B_isolate MPXV/USA/WA-UW-098347/2022	197205	OP743970	MPXV_OP743970	Virus_dsDNA_env; Poxviridae; Chordopoxvirinae; Orthopoxvirus; MPXV; 2; B	Monkeypox virus	Linear	OP743970 USA 2022	West Af	3	2	N America	USA	USA: WA	B	Human	MPXV/USA/WA-UW-098347/2022	2022	Homo sapiens	OP743970
OP743971	Wed Jun 26 18:51:23 CDT 2024	MPXV; 2; B_isolate MPXV/USA/WA-UW-098189/2022	197205	OP743971	MPXV_OP743971	Virus_dsDNA_env; Poxviridae; Chordopoxvirinae; Orthopoxvirus; MPXV; 2; B	Monkeypox virus	Linear	OP743971 USA 2022	West Af	3	2	N America	USA	USA: WA	B	Human	MPXV/USA/WA-UW-098189/2022	2022	Homo sapiens	OP743971
OP743972	Wed Jun 26 18:51:23 CDT 2024	MPXV; 2; B_isolate MPXV/USA/WA-UW-094364/2022	197205	OP743972	MPXV_OP743972	Virus_dsDNA_env; Poxviridae; Chordopoxvirinae; Orthopoxvirus; MPXV; 2; B	Monkeypox virus	Linear	OP743972 USA 2022	West Af	3	2	N America	USA	USA: WA	B	Human	MPXV/USA/WA-UW-094364/2022	2022	Homo sapiens	OP743972
OP743973	Wed Jun 26 18:51:23 CDT 2024	MPXV; 2; B_isolate MPXV/USA/WA-UW-098936/2022	197207	OP743973	MPXV_OP743973	Virus_dsDNA_env; Poxviridae; Chordopoxvirinae; Orthopoxvirus; MPXV; 2; B	Monkeypox virus	Linear	OP743973 USA 2022	West Af	3	2	N America	USA	USA: WA	B	Human	MPXV/USA/WA-UW-098936/2022	2022	Homo sapiens	OP743973
OP743974	Wed Jun 26 18:51:23 CDT 2024	MPXV; 2; B_isolate MPXV/USA/WA-UW-092407/2022	197207	OP743974	MPXV_OP743974	Virus_dsDNA_env; Poxviridae; Chordopoxvirinae; Orthopoxvirus; MPXV; 2; B	Monkeypox virus	Linear	OP743974 USA 2022	West Af	3	2	N America	USA	USA: WA	B	Human	MPXV/USA/WA-UW-092407/2022	2022	Homo sapiens	OP743974
OP743975	Wed Jun 26 18:51:23 CDT 2024	MPXV; 2; B_isolate MPXV/USA/WA-UW-098297/2022	197191	OP743975	MPXV_OP743975	Virus_dsDNA_env; Poxviridae; Chordopoxvirinae; Orthopoxvirus; MPXV; 2; B	Monkeypox virus	Linear	OP743975 USA 2022	West Af	3	2	N America	USA	USA: WA	B	Human	MPXV/USA/WA-UW-098297/2022	2022	Homo sapiens	OP743975
OP743976	Wed Jun 26 18:51:23 CDT 2024	MPXV; 2; B_isolate MPXV/USA/WA-UW-096136/2022	197191	OP743976	MPXV_OP743976	Virus_dsDNA_env; Poxviridae; Chordopoxvirinae; Orthopoxvirus; MPXV; 2; B	Monkeypox virus	Linear	OP743976 USA 2022	West Af	3	2	N America	USA	USA: WA	B	Human	MPXV/USA/WA-UW-096136/2022	2022	Homo sapiens	OP743976
OP743978	Wed Jun 26 18:51:23 CDT 2024	MPXV; 2; B_isolate MPXV/USA/WA-UW-090635/2022	197205	OP743978	MPXV_OP743978	Virus_dsDNA_env; Poxviridae; Chordopoxvirinae; Orthopoxvirus; MPXV; 2; B	Monkeypox virus	Linear	OP743978 USA 2022	West Af	3	2	N America	USA	USA: WA	B	Human	MPXV/USA/WA-UW-090635/2022	2022	Homo sapiens	OP743978
OP743979	Wed Jun 26 18:51:23 CDT 2024	MPXV; 2; B_isolate MPXV/USA/WA-UW-092912/2022	197188	OP743979	MPXV_OP743979	Virus_dsDNA_env; Poxviridae; Chordopoxvirinae; Orthopoxvirus; MPXV; 2; B	Monkeypox virus	Linear	OP743979 USA 2022	West Af	3	2	N America	USA	USA: WA	B	Human	MPXV/USA/WA-UW-092912/2022	2022	Homo sapiens	OP743979
OP743980	Wed Jun 26 18:51:23 CDT 2024	MPXV; 2; B_isolate MPXV/USA/WA-UW-091162/2022	197207	OP743980	MPXV_OP743980	Virus_dsDNA_env; Poxviridae; Chordopoxvirinae; Orthopoxvirus; MPXV; 2; B	Monkeypox virus	Linear	OP743980 USA 2022	West Af	3	2	N America	USA	USA: WA	B	Human	MPXV/USA/WA-UW-091162/2022	2022	Homo sapiens	OP743980
OP743981	Wed Jun 26 18:51:23 CDT 2024	MPXV; 2; B_isolate MPXV/USA/WA-UW-093226/2022	197193	OP743981	MPXV_OP743981	Virus_dsDNA_env; Poxviridae; Chordopoxvirinae; Orthopoxvirus; MPXV; 2; B	Monkeypox virus	Linear	OP743981 USA 2022	West Af	3	2	N America	USA	USA: WA	B	Human	MPXV/USA/WA-UW-093226/2022	2022	Homo sapiens	OP743981
OP743982	Wed Jun 26 18:51:23 CDT 2024	MPXV; 2; B_isolate MPXV/USA/WA-UW-099700/2022	197189	OP743982	MPXV_OP743982	Virus_dsDNA_env; Poxviridae; Chordopoxvirinae; Orthopoxvirus; MPXV; 2; B	Monkeypox virus	Linear	OP743982 USA 2022	West Af	3	2	N America	USA	USA: WA	B	Human	MPXV/USA/WA-UW-099700/2022	2022	Homo sapiens	OP743982
OP743983	Wed Jun 26 18:51:23 CDT 2024	MPXV; 2; B_isolate MPXV/USA/WA-UW-099493/2022	197207	OP743983	MPXV_OP743983	Virus_dsDNA_env; Poxviridae; Chordopoxvirinae; Orthopoxvirus; MPXV; 2; B	Monkeypox virus	Linear	OP743983 USA 2022	West Af	3	2	N America	USA	USA: WA	B	Human	MPXV/USA/WA-UW-099493/2022	2022	Homo sapiens	OP743983
OP743984	Wed Jun 26 18:51:23 CDT 2024	MPXV; 2; B_isolate MPXV/USA/WA-UW-090134/2022	197188	OP743984	MPXV_OP743984	Virus_dsDNA_env; Poxviridae; Chordopoxvirinae; Orthopoxvirus; MPXV; 2; B	Monkeypox virus	Linear	OP743984 USA 2022	West Af	3	2	N America	USA	USA: WA	B	Human	MPXV/USA/WA-UW-090134/2022	2022	Homo sapiens	OP743984
OP743985	Wed Jun 26 18:51:23 CDT 2024	MPXV; 2; B_isolate MPXV/USA/WA-UW-096529/2022	197205	OP743985	MPXV_OP743985	Virus_dsDNA_env; Poxviridae; Chordopoxvirinae; Orthopoxvirus; MPXV; 2; B	Monkeypox virus	Linear	OP743985 USA 2022	West Af	3	2	N America	USA	USA: WA	B	Human	MPXV/USA/WA-UW-096529/2022	2022	Homo sapiens	OP743985
OP743986	Wed Jun 26 18:51:23 CDT 2024	MPXV; 2; B_isolate MPXV/USA/WA-UW-098348/2022	197193	OP743986	MPXV_OP743986	Virus_dsDNA_env; Poxviridae; Chordopoxvirinae; Orthopoxvirus; MPXV; 2; B	Monkeypox virus	Linear	OP743986 USA 2022	West Af	3	2	N America	USA	USA: WA	B	Human	MPXV/USA/WA-UW-098348/2022	2022	Homo sapiens	OP743986
OP743987	Wed Jun 26 18:51:23 CDT 2024	MPXV; 2; B_isolate MPXV/USA/WA-UW-098721/2022	197205	OP743987	MPXV_OP743987	Virus_dsDNA_env; Poxviridae; Chordopoxvirinae; Orthopoxvirus; MPXV; 2; B	Monkeypox virus	Linear	OP743987 USA 2022	West Af	3	2	N America	USA	USA: WA	B	Human	MPXV/USA/WA-UW-098721/2022	2022	Homo sapiens	OP743987
OP743988	Wed Jun 26 18:51:23 CDT 2024	MPXV; 2; B_isolate MPXV/USA/WA-UW-095681/2022	197207	OP743988	MPXV_OP743988	Virus_dsDNA_env; Poxviridae; Chordopoxvirinae; Orthopoxvirus; MPXV; 2; B	Monkeypox virus	Linear	OP743988 USA 2022	West Af	3	2	N America	USA	USA: WA	B	Human	MPXV/USA/WA-UW-095681/2022	2022	Homo sapiens	OP743988
OP743989	Wed Jun 26 18:51:23 CDT 2024	MPXV; 2; B_isolate MPXV/USA/WA-UW-090611/2022	197200	OP743989	MPXV_OP743989	Virus_dsDNA_env; Poxviridae; Chordopoxvirinae; Orthopoxvirus; MPXV; 2; B	Monkeypox virus	Linear	OP743989 USA 2022	West Af	3	2	N America	USA	USA: WA	B	Human	MPXV/USA/WA-UW-090611/2022	2022	Homo sapiens	OP743989
OP743990	Wed Jun 26 18:51:23 CDT 2024	MPXV; 2; B_isolate MPXV/USA/WA-UW-098408/2022	197200	OP743990	MPXV_OP743990	Virus_dsDNA_env; Poxviridae; Chordopoxvirinae; Orthopoxvirus; MPXV; 2; B	Monkeypox virus	Linear	OP743990 USA 2022	West Af	3	2	N America	USA	USA: WA	B	Human	MPXV/USA/WA-UW-098408/2022	2022	Homo sapiens	OP743990
OP743991	Wed Jun 26 18:51:23 CDT 2024	MPXV; 2; B_isolate MPXV/USA/WA-UW-092990/2022	197205	OP743991	MPXV_OP743991	Virus_dsDNA_env; Poxviridae; Chordopoxvirinae; Orthopoxvirus; MPXV; 2; B	Monkeypox virus	Linear	OP743991 USA 2022	West Af	3	2	N America	USA	USA: WA	B	Human	MPXV/USA/WA-UW-092990/2022	2022	Homo sapiens	OP743991
OP743992	Wed Jun 26 18:51:23 CDT 2024	MPXV; 2; B_isolate MPXV/USA/WA-UW-096711/2022	197190	OP743992	MPXV_OP743992	Virus_dsDNA_env; Poxviridae; Chordopoxvirinae; Orthopoxvirus; MPXV; 2; B	Monkeypox virus	Linear	OP743992 USA 2022	West Af	3	2	N America	USA	USA: WA	B	Human	MPXV/USA/WA-UW-096711/2022	2022	Homo sapiens	OP743992
OP743993	Wed Jun 26 18:51:23 CDT 2024	MPXV; 2; B_isolate MPXV/USA/WA-UW-094603/2022	197207	OP743993	MPXV_OP743993	Virus_dsDNA_env; Poxviridae; Chordopoxvirinae; Orthopoxvirus; MPXV; 2; B	Monkeypox virus	Linear	OP743993 USA 2022	West Af	3	2	N America	USA	USA: WA	B	Human	MPXV/USA/WA-UW-094603/2022	2022	Homo sapiens	OP743993
OP743994	Wed Jun 26 18:51:23 CDT 2024	MPXV; 2; B_isolate MPXV/USA/WA-UW-086389/2022	197205	OP743994	MPXV_OP743994	Virus_dsDNA_env; Poxviridae; Chordopoxvirinae; Orthopoxvirus; MPXV; 2; B	Monkeypox virus	Linear	OP743994 USA 2022	West Af	3	2	N America	USA	USA: WA	B	Human	MPXV/USA/WA-UW-086389/2022	2022	Homo sapiens	OP743994
OP743995	Wed Jun 26 18:51:23 CDT 2024	MPXV; 2; B_isolate MPXV/USA/WA-UW-102951/2022	197193	OP743995	MPXV_OP743995	Virus_dsDNA_env; Poxviridae; Chordopoxvirinae; Orthopoxvirus; MPXV; 2; B	Monkeypox virus	Linear	OP743995 USA 2022	West Af	3	2	N America	USA	USA: WA	B	Human	MPXV/USA/WA-UW-102951/2022	2022	Homo sapiens	OP743995
OP743996	Wed Jun 26 18:51:23 CDT 2024	MPXV; 2; B_isolate MPXV/USA/WA-UW-108647/2022	197192	OP743996	MPXV_OP743996	Virus_dsDNA_env; Poxviridae; Chordopoxvirinae; Orthopoxvirus; MPXV; 2; B	Monkeypox virus	Linear	OP743996 USA 2022	West Af	3	2	N America	USA	USA: WA	B	Human	MPXV/USA/WA-UW-108647/2022	2022	Homo sapiens	OP743996
OP743997	Wed Jun 26 18:51:23 CDT 2024	MPXV; 2; B_isolate MPXV/USA/Unknown-UW-105322/2022	197191	OP743997	MPXV_OP743997	Virus_dsDNA_env; Poxviridae; Chordopoxvirinae; Orthopoxvirus; MPXV; 2; B	Monkeypox virus	Linear	OP743997 USA 2022	West Af	3	2	N America	USA	USA:	B	Human	MPXV/USA/Unknown-UW-105322/2022	2022	Homo sapiens	OP743997
OP743998	Wed Jun 26 18:51:23 CDT 2024	MPXV; 2; B_isolate MPXV/USA/Unknown-UW-102378/2022	197185	OP743998	MPXV_OP743998	Virus_dsDNA_env; Poxviridae; Chordopoxvirinae; Orthopoxvirus; MPXV; 2; B	Monkeypox virus	Linear	OP743998 USA 2022	West Af	3	2	N America	USA	USA:	B	Human	MPXV/USA/Unknown-UW-102378/2022	2022	Homo sapiens	OP743998
OP743999	Wed Jun 26 18:51:23 CDT 2024	MPXV; 2; B_isolate MPXV/USA/WA-UW-108943/2022	197194	OP743999	MPXV_OP743999	Virus_dsDNA_env; Poxviridae; Chordopoxvirinae; Orthopoxvirus; MPXV; 2; B	Monkeypox virus	Linear	OP743999 USA 2022	West Af	3	2	N America	USA	USA: WA	B	Human	MPXV/USA/WA-UW-108943/2022	2022	Homo sapiens	OP743999
OP744000	Wed Jun 26 18:51:23 CDT 2024	MPXV; 2; B_isolate MPXV/USA/Unknown-UW-101667/2022	197188	OP744000	MPXV_OP744000	Virus_dsDNA_env; Poxviridae; Chordopoxvirinae; Orthopoxvirus; MPXV; 2; B	Monkeypox virus	Linear	OP744000 USA 2022	West Af	3	2	N America	USA	USA:	B	Human	MPXV/USA/Unknown-UW-101667/2022	2022	Homo sapiens	OP744000
OP747051	Wed Jun 26 18:51:23 CDT 2024	MPXV; 2; B_isolate MPXV/USA/WA-UW-085359/2022	197184	OP747051	MPXV_OP747051	Virus_dsDNA_env; Poxviridae; Chordopoxvirinae; Orthopoxvirus; MPXV; 2; B	Monkeypox virus	Linear	OP747051 USA 2022	West Af	3	2	N America	USA	USA: WA	B	Human	MPXV/USA/WA-UW-085359/2022	2022	Homo sapiens	OP747051
OP747052	Wed Jun 26 18:51:23 CDT 2024	MPXV; 2; B_isolate MPXV/USA/WA-UW-096615/2022	197196	OP747052	MPXV_OP747052	Virus_dsDNA_env; Poxviridae; Chordopoxvirinae; Orthopoxvirus; MPXV; 2; B	Monkeypox virus	Linear	OP747052 USA 2022	West Af	3	2	N America	USA	USA: WA	B	Human	MPXV/USA/WA-UW-096615/2022	2022	Homo sapiens	OP747052
OP747053	Wed Jun 26 18:51:23 CDT 2024	MPXV; 2; B_isolate MPXV/USA/WA-UW-097661/2022	197205	OP747053	MPXV_OP747053	Virus_dsDNA_env; Poxviridae; Chordopoxvirinae; Orthopoxvirus; MPXV; 2; B	Monkeypox virus	Linear	OP747053 USA 2022	West Af	3	2	N America	USA	USA: WA	B	Human	MPXV/USA/WA-UW-097661/2022	2022	Homo sapiens	OP747053
OP747054	Wed Jun 26 18:51:23 CDT 2024	MPXV; 2; B_isolate MPXV/USA/WA-UW-094434/2022	197205	OP747054	MPXV_OP747054	Virus_dsDNA_env; Poxviridae; Chordopoxvirinae; Orthopoxvirus; MPXV; 2; B	Monkeypox virus	Linear	OP747054 USA 2022	West Af	3	2	N America	USA	USA: WA	B	Human	MPXV/USA/WA-UW-094434/2022	2022	Homo sapiens	OP747054
OP747055	Wed Jun 26 18:51:23 CDT 2024	MPXV; 2; B_isolate MPXV/USA/WA-UW-095970/2022	197198	OP747055	MPXV_OP747055	Virus_dsDNA_env; Poxviridae; Chordopoxvirinae; Orthopoxvirus; MPXV; 2; B	Monkeypox virus	Linear	OP747055 USA 2022	West Af	3	2	N America	USA	USA: WA	B	Human	MPXV/USA/WA-UW-095970/2022	2022	Homo sapiens	OP747055
OP747056	Wed Jun 26 18:51:23 CDT 2024	MPXV; 2; B_isolate MPXV/USA/WA-UW-095653/2022	197202	OP747056	MPXV_OP747056	Virus_dsDNA_env; Poxviridae; Chordopoxvirinae; Orthopoxvirus; MPXV; 2; B	Monkeypox virus	Linear	OP747056 USA 2022	West Af	3	2	N America	USA	USA: WA	B	Human	MPXV/USA/WA-UW-095653/2022	2022	Homo sapiens	OP747056
OP747057	Wed Jun 26 18:51:23 CDT 2024	MPXV; 2; B_isolate MPXV/USA/WA-UW-091890/2022	197201	OP747057	MPXV_OP747057	Virus_dsDNA_env; Poxviridae; Chordopoxvirinae; Orthopoxvirus; MPXV; 2; B	Monkeypox virus	Linear	OP747057 USA 2022	West Af	3	2	N America	USA	USA: WA	B	Human	MPXV/USA/WA-UW-091890/2022	2022	Homo sapiens	OP747057
OP747058	Wed Jun 26 18:51:23 CDT 2024	MPXV; 2; B_isolate MPXV/USA/WA-UW-109000/2022	197205	OP747058	MPXV_OP747058	Virus_dsDNA_env; Poxviridae; Chordopoxvirinae; Orthopoxvirus; MPXV; 2; B	Monkeypox virus	Linear	OP747058 USA 2022	West Af	3	2	N America	USA	USA: WA	B	Human	MPXV/USA/WA-UW-109000/2022	2022	Homo sapiens	OP747058
OP747059	Wed Jun 26 18:51:23 CDT 2024	MPXV; 2; B_isolate MPXV/USA/Unknown-UW-109319/2022	197205	OP747059	MPXV_OP747059	Virus_dsDNA_env; Poxviridae; Chordopoxvirinae; Orthopoxvirus; MPXV; 2; B	Monkeypox virus	Linear	OP747059 USA 2022	West Af	3	2	N America	USA	USA:	B	Human	MPXV/USA/Unknown-UW-109319/2022	2022	Homo sapiens	OP747059
OP747060	Wed Jun 26 18:51:23 CDT 2024	MPXV; 2; B_isolate MPXV/USA/WA-UW-104793/2022	197191	OP747060	MPXV_OP747060	Virus_dsDNA_env; Poxviridae; Chordopoxvirinae; Orthopoxvirus; MPXV; 2; B	Monkeypox virus	Linear	OP747060 USA 2022	West Af	3	2	N America	USA	USA: WA	B	Human	MPXV/USA/WA-UW-104793/2022	2022	Homo sapiens	OP747060
OP747061	Wed Jun 26 18:51:23 CDT 2024	MPXV; 2; B_isolate MPXV/USA/Unknown-UW-093679/2022	197192	OP747061	MPXV_OP747061	Virus_dsDNA_env; Poxviridae; Chordopoxvirinae; Orthopoxvirus; MPXV; 2; B	Monkeypox virus	Linear	OP747061 USA 2022	West Af	3	2	N America	USA	USA:	B	Human	MPXV/USA/Unknown-UW-093679/2022	2022	Homo sapiens	OP747061
OP747062	Wed Jun 26 18:51:23 CDT 2024	MPXV; 2; B_isolate MPXV/USA/WA-UW-106624/2022	197205	OP747062	MPXV_OP747062	Virus_dsDNA_env; Poxviridae; Chordopoxvirinae; Orthopoxvirus; MPXV; 2; B	Monkeypox virus	Linear	OP747062 USA 2022	West Af	3	2	N America	USA	USA: WA	B	Human	MPXV/USA/WA-UW-106624/2022	2022	Homo sapiens	OP747062
OP752103	Wed Jun 26 18:51:23 CDT 2024	MPXV; 2; B_isolate MPXV_USA_2022_AR0002	197223	OP752103	MPXV_OP752103	Virus_dsDNA_env; Poxviridae; Chordopoxvirinae; Orthopoxvirus; MPXV; 2; B	Monkeypox virus	Linear	OP752103 USA 2022	West Af	3	2	N America	USA	USA: AR	B	Human	MPXV_USA_2022_AR0002	2022	Homo sapiens	OP752103
OP752104	Wed Jun 26 18:51:23 CDT 2024	MPXV; 2; B_isolate MPXV_USA_2022_AZ0006	197172	OP752104	MPXV_OP752104	Virus_dsDNA_env; Poxviridae; Chordopoxvirinae; Orthopoxvirus; MPXV; 2; B	Monkeypox virus	Linear	OP752104 USA 2022	West Af	3	2	N America	USA	USA: AZ	B	Human	MPXV_USA_2022_AZ0006	2022	Homo sapiens	OP752104
OP752105	Wed Jun 26 18:51:23 CDT 2024	MPXV; 2; B_isolate MPXV_USA_2022_CA0038	197179	OP752105	MPXV_OP752105	Virus_dsDNA_env; Poxviridae; Chordopoxvirinae; Orthopoxvirus; MPXV; 2; B	Monkeypox virus	Linear	OP752105 USA 2022	West Af	3	2	N America	USA	USA: CA	B	Human	MPXV_USA_2022_CA0038	2022	Homo sapiens	OP752105
OP752106	Wed Jun 26 18:51:23 CDT 2024	MPXV; 2; B_isolate MPXV_USA_2022_FL0025	197114	OP752106	MPXV_OP752106	Virus_dsDNA_env; Poxviridae; Chordopoxvirinae; Orthopoxvirus; MPXV; 2; B	Monkeypox virus	Linear	OP752106 USA 2022	West Af	3	2	N America	USA	USA: FL	B	Human	MPXV_USA_2022_FL0025	2022	Homo sapiens	OP752106
OP752107	Wed Jun 26 18:51:23 CDT 2024	MPXV; 2; B_isolate MPXV_USA_2022_GA0018	197315	OP752107	MPXV_OP752107	Virus_dsDNA_env; Poxviridae; Chordopoxvirinae; Orthopoxvirus; MPXV; 2; B	Monkeypox virus	Linear	OP752107 USA 2022	West Af	2	2	N America	USA	USA: GA	B	Human	MPXV_USA_2022_GA0018	2022	Homo sapiens	OP752107
OP752108	Wed Jun 26 18:51:23 CDT 2024	MPXV; 2; B_isolate MPXV_USA_2022_NM0001	197049	OP752108	MPXV_OP752108	Virus_dsDNA_env; Poxviridae; Chordopoxvirinae; Orthopoxvirus; MPXV; 2; B	Monkeypox virus	Linear	OP752108 USA 2022	West Af	3	2	N America	USA	USA: NM	B	Human	MPXV_USA_2022_NM0001	2022	Homo sapiens	OP752108
OP752109	Wed Jun 26 18:51:23 CDT 2024	MPXV; 2; B_isolate MPXV_USA_2022_NM0002	197174	OP752109	MPXV_OP752109	Virus_dsDNA_env; Poxviridae; Chordopoxvirinae; Orthopoxvirus; MPXV; 2; B	Monkeypox virus	Linear	OP752109 USA 2022	West Af	3	2	N America	USA	USA: NM	B	Human	MPXV_USA_2022_NM0002	2022	Homo sapiens	OP752109
OP752110	Wed Jun 26 18:51:23 CDT 2024	MPXV; 2; B_isolate MPXV_USA_2022_NY0032	197176	OP752110	MPXV_OP752110	Virus_dsDNA_env; Poxviridae; Chordopoxvirinae; Orthopoxvirus; MPXV; 2; B	Monkeypox virus	Linear	OP752110 USA 2022	West Af	3	2	N America	USA	USA: NY	B	Human	MPXV_USA_2022_NY0032	2022	Homo sapiens	OP752110
OP752111	Wed Jun 26 18:51:23 CDT 2024	MPXV; 2; B_isolate MPXV_USA_2022_NY0033	197219	OP752111	MPXV_OP752111	Virus_dsDNA_env; Poxviridae; Chordopoxvirinae; Orthopoxvirus; MPXV; 2; B	Monkeypox virus	Linear	OP752111 USA 2022	West Af	3	2	N America	USA	USA: NY	B	Human	MPXV_USA_2022_NY0033	2022	Homo sapiens	OP752111
OP752112	Wed Jun 26 18:51:23 CDT 2024	MPXV; 2; B_isolate MPXV_USA_2022_NY0034	197179	OP752112	MPXV_OP752112	Virus_dsDNA_env; Poxviridae; Chordopoxvirinae; Orthopoxvirus; MPXV; 2; B	Monkeypox virus	Linear	OP752112 USA 2022	West Af	3	2	N America	USA	USA: NY	B	Human	MPXV_USA_2022_NY0034	2022	Homo sapiens	OP752112
OP752113	Wed Jun 26 18:51:23 CDT 2024	MPXV; 2; B_isolate MPXV_USA_2022_NY0035	197235	OP752113	MPXV_OP752113	Virus_dsDNA_env; Poxviridae; Chordopoxvirinae; Orthopoxvirus; MPXV; 2; B	Monkeypox virus	Linear	OP752113 USA 2022	West Af	3	2	N America	USA	USA: NY	B	Human	MPXV_USA_2022_NY0035	2022	Homo sapiens	OP752113
OP752114	Wed Jun 26 18:51:23 CDT 2024	MPXV; 2; B_isolate MPXV_USA_2022_OR0003	197204	OP752114	MPXV_OP752114	Virus_dsDNA_env; Poxviridae; Chordopoxvirinae; Orthopoxvirus; MPXV; 2; B	Monkeypox virus	Linear	OP752114 USA 2022	West Af	3	2	N America	USA	USA: OR	B	Human	MPXV_USA_2022_OR0003	2022	Homo sapiens	OP752114
OP752115	Wed Jun 26 18:51:23 CDT 2024	MPXV; 2; B_isolate MPXV_USA_2022_OR0004	197168	OP752115	MPXV_OP752115	Virus_dsDNA_env; Poxviridae; Chordopoxvirinae; Orthopoxvirus; MPXV; 2; B	Monkeypox virus	Linear	OP752115 USA 2022	West Af	3	2	N America	USA	USA: OR	B	Human	MPXV_USA_2022_OR0004	2022	Homo sapiens	OP752115
OP752116	Wed Jun 26 18:51:23 CDT 2024	MPXV; 2; B_isolate MPXV_USA_2022_OR0005	197121	OP752116	MPXV_OP752116	Virus_dsDNA_env; Poxviridae; Chordopoxvirinae; Orthopoxvirus; MPXV; 2; B	Monkeypox virus	Linear	OP752116 USA 2022	West Af	3	2	N America	USA	USA: OR	B	Human	MPXV_USA_2022_OR0005	2022	Homo sapiens	OP752116
OP752117	Wed Jun 26 18:51:23 CDT 2024	MPXV; 2; B_isolate MPXV_USA_2022_SC0004	197165	OP752117	MPXV_OP752117	Virus_dsDNA_env; Poxviridae; Chordopoxvirinae; Orthopoxvirus; MPXV; 2; B	Monkeypox virus	Linear	OP752117 USA 2022	West Af	3	2	N America	USA	USA: SC	B	Human	MPXV_USA_2022_SC0004	2022	Homo sapiens	OP752117
OP752118	Wed Jun 26 18:51:23 CDT 2024	MPXV; 2; B_isolate MPXV_USA_2022_SC0005	197073	OP752118	MPXV_OP752118	Virus_dsDNA_env; Poxviridae; Chordopoxvirinae; Orthopoxvirus; MPXV; 2; B	Monkeypox virus	Linear	OP752118 USA 2022	West Af	3	2	N America	USA	USA: SC	B	Human	MPXV_USA_2022_SC0005	2022	Homo sapiens	OP752118
OP752119	Wed Jun 26 18:51:23 CDT 2024	MPXV; 2; B_isolate MPXV_USA_2022_TN0006	197172	OP752119	MPXV_OP752119	Virus_dsDNA_env; Poxviridae; Chordopoxvirinae; Orthopoxvirus; MPXV; 2; B	Monkeypox virus	Linear	OP752119 USA 2022	West Af	3	2	N America	USA	USA: TN	B	Human	MPXV_USA_2022_TN0006	2022	Homo sapiens	OP752119
OP752120	Wed Jun 26 18:51:23 CDT 2024	MPXV; 2; B_isolate MPXV_USA_2022_TN0007	197159	OP752120	MPXV_OP752120	Virus_dsDNA_env; Poxviridae; Chordopoxvirinae; Orthopoxvirus; MPXV; 2; B	Monkeypox virus	Linear	OP752120 USA 2022	West Af	3	2	N America	USA	USA: TN	B	Human	MPXV_USA_2022_TN0007	2022	Homo sapiens	OP752120
OP752121	Wed Jun 26 18:51:23 CDT 2024	MPXV; 2; B_isolate MPXV_USA_2022_TX0028	197132	OP752121	MPXV_OP752121	Virus_dsDNA_env; Poxviridae; Chordopoxvirinae; Orthopoxvirus; MPXV; 2; B	Monkeypox virus	Linear	OP752121 USA 2022	West Af	3	2	N America	USA	USA: TX	B	Human	MPXV_USA_2022_TX0028	2022	Homo sapiens	OP752121
OP752122	Wed Jun 26 18:51:23 CDT 2024	MPXV; 2; B_isolate MPXV_USA_2022_WA0010	197171	OP752122	MPXV_OP752122	Virus_dsDNA_env; Poxviridae; Chordopoxvirinae; Orthopoxvirus; MPXV; 2; B	Monkeypox virus	Linear	OP752122 USA 2022	West Af	3	2	N America	USA	USA: WA	B	Human	MPXV_USA_2022_WA0010	2022	Homo sapiens	OP752122
OP752123	Wed Jun 26 18:51:23 CDT 2024	MPXV; 2; B_isolate MPXV_USA_2022_WA0011	197253	OP752123	MPXV_OP752123	Virus_dsDNA_env; Poxviridae; Chordopoxvirinae; Orthopoxvirus; MPXV; 2; B	Monkeypox virus	Linear	OP752123 USA 2022	West Af	3	2	N America	USA	USA: WA	B	Human	MPXV_USA_2022_WA0011	2022	Homo sapiens	OP752123
OP752124	Wed Jun 26 18:51:23 CDT 2024	MPXV; 2; B_isolate MPXV_USA_2022_WA0012	197173	OP752124	MPXV_OP752124	Virus_dsDNA_env; Poxviridae; Chordopoxvirinae; Orthopoxvirus; MPXV; 2; B	Monkeypox virus	Linear	OP752124 USA 2022	West Af	3	2	N America	USA	USA: WA	B	Human	MPXV_USA_2022_WA0012	2022	Homo sapiens	OP752124
OP752125	Wed Jun 26 18:51:23 CDT 2024	MPXV; 2; B_isolate MPXV_USA_2022_WA0014	197297	OP752125	MPXV_OP752125	Virus_dsDNA_env; Poxviridae; Chordopoxvirinae; Orthopoxvirus; MPXV; 2; B	Monkeypox virus	Linear	OP752125 USA 2022	West Af	2	2	N America	USA	USA: WA	B	Human	MPXV_USA_2022_WA0014	2022	Homo sapiens	OP752125
OP752126	Wed Jun 26 18:51:23 CDT 2024	MPXV; 2; B_isolate MPXV_USA_2022_WA0015	197179	OP752126	MPXV_OP752126	Virus_dsDNA_env; Poxviridae; Chordopoxvirinae; Orthopoxvirus; MPXV; 2; B	Monkeypox virus	Linear	OP752126 USA 2022	West Af	3	2	N America	USA	USA: WA	B	Human	MPXV_USA_2022_WA0015	2022	Homo sapiens	OP752126
OP764614	Wed Jun 26 18:51:23 CDT 2024	MPXV; 2; B_isolate MPXV/Germany/2022/RKI556	197140	OP764614	MPXV_OP764614	Virus_dsDNA_env; Poxviridae; Chordopoxvirinae; Orthopoxvirus; MPXV; 2; B	Monkeypox virus	Linear	OP764614 DEU 2022	West Af	3	2	Europe	DEU	Germany	B	Human	MPXV/Germany/2022/RKI556	2022	Homo sapiens	OP764614
OP764615	Wed Jun 26 18:51:23 CDT 2024	MPXV; 2; B_isolate MPXV/Germany/2022/RKI557	197140	OP764615	MPXV_OP764615	Virus_dsDNA_env; Poxviridae; Chordopoxvirinae; Orthopoxvirus; MPXV; 2; B	Monkeypox virus	Linear	OP764615 DEU 2022	West Af	3	2	Europe	DEU	Germany	B	Human	MPXV/Germany/2022/RKI557	2022	Homo sapiens	OP764615
OP764616	Wed Jun 26 18:51:23 CDT 2024	MPXV; 2; B_isolate MPXV/Germany/2022/RKI558	197141	OP764616	MPXV_OP764616	Virus_dsDNA_env; Poxviridae; Chordopoxvirinae; Orthopoxvirus; MPXV; 2; B	Monkeypox virus	Linear	OP764616 DEU 2022	West Af	3	2	Europe	DEU	Germany	B	Human	MPXV/Germany/2022/RKI558	2022	Homo sapiens	OP764616
OP764617	Wed Jun 26 18:51:23 CDT 2024	MPXV; 2; B_isolate MPXV/Germany/2022/RKI559	197141	OP764617	MPXV_OP764617	Virus_dsDNA_env; Poxviridae; Chordopoxvirinae; Orthopoxvirus; MPXV; 2; B	Monkeypox virus	Linear	OP764617 DEU 2022	West Af	3	2	Europe	DEU	Germany	B	Human	MPXV/Germany/2022/RKI559	2022	Homo sapiens	OP764617
OP764618	Wed Jun 26 18:51:23 CDT 2024	MPXV; 2; B_isolate MPXV/Germany/2022/RKI560	197137	OP764618	MPXV_OP764618	Virus_dsDNA_env; Poxviridae; Chordopoxvirinae; Orthopoxvirus; MPXV; 2; B	Monkeypox virus	Linear	OP764618 DEU 2022	West Af	3	2	Europe	DEU	Germany	B	Human	MPXV/Germany/2022/RKI560	2022	Homo sapiens	OP764618
OP764619	Wed Jun 26 18:51:23 CDT 2024	MPXV; 2; B_isolate MPXV/Germany/2022/RKI561	196228	OP764619	MPXV_OP764619	Virus_dsDNA_env; Poxviridae; Chordopoxvirinae; Orthopoxvirus; MPXV; 2; B	Monkeypox virus	Linear	OP764619 DEU 2022	West Af	3	2	Europe	DEU	Germany	B	Human	MPXV/Germany/2022/RKI561	2022	Homo sapiens	OP764619
OP764621	Wed Jun 26 18:51:23 CDT 2024	MPXV; 2; B_isolate MPXV/Germany/2022/RKI563	197140	OP764621	MPXV_OP764621	Virus_dsDNA_env; Poxviridae; Chordopoxvirinae; Orthopoxvirus; MPXV; 2; B	Monkeypox virus	Linear	OP764621 DEU 2022	West Af	3	2	Europe	DEU	Germany	B	Human	MPXV/Germany/2022/RKI563	2022	Homo sapiens	OP764621
OP764622	Wed Jun 26 18:51:23 CDT 2024	MPXV; 2; B_isolate MPXV/Germany/2022/RKI564	197140	OP764622	MPXV_OP764622	Virus_dsDNA_env; Poxviridae; Chordopoxvirinae; Orthopoxvirus; MPXV; 2; B	Monkeypox virus	Linear	OP764622 DEU 2022	West Af	3	2	Europe	DEU	Germany	B	Human	MPXV/Germany/2022/RKI564	2022	Homo sapiens	OP764622
OP764623	Wed Jun 26 18:51:23 CDT 2024	MPXV; 2; B_isolate MPXV/Germany/2022/RKI565	197141	OP764623	MPXV_OP764623	Virus_dsDNA_env; Poxviridae; Chordopoxvirinae; Orthopoxvirus; MPXV; 2; B	Monkeypox virus	Linear	OP764623 DEU 2022	West Af	3	2	Europe	DEU	Germany	B	Human	MPXV/Germany/2022/RKI565	2022	Homo sapiens	OP764623
OP764624	Wed Jun 26 18:51:23 CDT 2024	MPXV; 2; B_isolate MPXV/Germany/2022/RKI566	197140	OP764624	MPXV_OP764624	Virus_dsDNA_env; Poxviridae; Chordopoxvirinae; Orthopoxvirus; MPXV; 2; B	Monkeypox virus	Linear	OP764624 DEU 2022	West Af	3	2	Europe	DEU	Germany	B	Human	MPXV/Germany/2022/RKI566	2022	Homo sapiens	OP764624
OP764625	Wed Jun 26 18:51:23 CDT 2024	MPXV; 2; B_isolate MPXV/Germany/2022/RKI567	197140	OP764625	MPXV_OP764625	Virus_dsDNA_env; Poxviridae; Chordopoxvirinae; Orthopoxvirus; MPXV; 2; B	Monkeypox virus	Linear	OP764625 DEU 2022	West Af	3	2	Europe	DEU	Germany	B	Human	MPXV/Germany/2022/RKI567	2022	Homo sapiens	OP764625
OP764627	Wed Jun 26 18:51:23 CDT 2024	MPXV; 2; B_isolate MPXV/Germany/2022/RKI569	197140	OP764627	MPXV_OP764627	Virus_dsDNA_env; Poxviridae; Chordopoxvirinae; Orthopoxvirus; MPXV; 2; B	Monkeypox virus	Linear	OP764627 DEU 2022	West Af	3	2	Europe	DEU	Germany	B	Human	MPXV/Germany/2022/RKI569	2022	Homo sapiens	OP764627
OP764628	Wed Jun 26 18:51:23 CDT 2024	MPXV; 2; B_isolate MPXV/Germany/2022/RKI570	197140	OP764628	MPXV_OP764628	Virus_dsDNA_env; Poxviridae; Chordopoxvirinae; Orthopoxvirus; MPXV; 2; B	Monkeypox virus	Linear	OP764628 DEU 2022	West Af	3	2	Europe	DEU	Germany	B	Human	MPXV/Germany/2022/RKI570	2022	Homo sapiens	OP764628
OP764629	Wed Jun 26 18:51:23 CDT 2024	MPXV; 2; B_isolate MPXV/Germany/2022/RKI571	197141	OP764629	MPXV_OP764629	Virus_dsDNA_env; Poxviridae; Chordopoxvirinae; Orthopoxvirus; MPXV; 2; B	Monkeypox virus	Linear	OP764629 DEU 2022	West Af	3	2	Europe	DEU	Germany	B	Human	MPXV/Germany/2022/RKI571	2022	Homo sapiens	OP764629
OP820454	Wed Jun 26 18:51:23 CDT 2024	MPXV; 2; B_isolate MPXV/USA/IL-RIPHL-MPXV_10005/2022	196451	OP820454	MPXV_OP820454	Virus_dsDNA_env; Poxviridae; Chordopoxvirinae; Orthopoxvirus; MPXV; 2; B	Monkeypox virus	Linear	OP820454 USA 2022	West Af	3	2	N America	USA	USA: IL	B	Human	MPXV/USA/IL-RIPHL-MPXV_10005/2022	2022	Homo sapiens	OP820454
OP820455	Wed Jun 26 18:51:23 CDT 2024	MPXV; 2; B_isolate MPXV/USA/IL-RIPHL-MPXV_10006/2022	196439	OP820455	MPXV_OP820455	Virus_dsDNA_env; Poxviridae; Chordopoxvirinae; Orthopoxvirus; MPXV; 2; B	Monkeypox virus	Linear	OP820455 USA 2022	West Af	3	2	N America	USA	USA: IL	B	Human	MPXV/USA/IL-RIPHL-MPXV_10006/2022	2022	Homo sapiens	OP820455
OP820456	Wed Jun 26 18:51:23 CDT 2024	MPXV; 2; B_isolate MPXV/USA/IL-RIPHL-MPXV_10007/2022	196432	OP820456	MPXV_OP820456	Virus_dsDNA_env; Poxviridae; Chordopoxvirinae; Orthopoxvirus; MPXV; 2; B	Monkeypox virus	Linear	OP820456 USA 2022	West Af	3	2	N America	USA	USA: IL	B	Human	MPXV/USA/IL-RIPHL-MPXV_10007/2022	2022	Homo sapiens	OP820456
OP837334	Wed Jun 26 18:51:23 CDT 2024	MPXV; 2; B_isolate MPXV/Germany/2022/RKI572	197141	OP837334	MPXV_OP837334	Virus_dsDNA_env; Poxviridae; Chordopoxvirinae; Orthopoxvirus; MPXV; 2; B	Monkeypox virus	Linear	OP837334 DEU 2022	West Af	3	2	Europe	DEU	Germany	B	Human	MPXV/Germany/2022/RKI572	2022	Homo sapiens	OP837334
OP837335	Wed Jun 26 18:51:23 CDT 2024	MPXV; 2; B_isolate MPXV/Germany/2022/RKI573	197140	OP837335	MPXV_OP837335	Virus_dsDNA_env; Poxviridae; Chordopoxvirinae; Orthopoxvirus; MPXV; 2; B	Monkeypox virus	Linear	OP837335 DEU 2022	West Af	3	2	Europe	DEU	Germany	B	Human	MPXV/Germany/2022/RKI573	2022	Homo sapiens	OP837335
OP837336	Wed Jun 26 18:51:23 CDT 2024	MPXV; 2; B_isolate MPXV/Germany/2022/RKI574	197140	OP837336	MPXV_OP837336	Virus_dsDNA_env; Poxviridae; Chordopoxvirinae; Orthopoxvirus; MPXV; 2; B	Monkeypox virus	Linear	OP837336 DEU 2022	West Af	3	2	Europe	DEU	Germany	B	Human	MPXV/Germany/2022/RKI574	2022	Homo sapiens	OP837336
OP837337	Wed Jun 26 18:51:23 CDT 2024	MPXV; 2; B_isolate MPXV/Germany/2022/RKI575	197140	OP837337	MPXV_OP837337	Virus_dsDNA_env; Poxviridae; Chordopoxvirinae; Orthopoxvirus; MPXV; 2; B	Monkeypox virus	Linear	OP837337 DEU 2022	West Af	3	2	Europe	DEU	Germany	B	Human	MPXV/Germany/2022/RKI575	2022	Homo sapiens	OP837337
OP837338	Wed Jun 26 18:51:23 CDT 2024	MPXV; 2; B_isolate MPXV/Germany/2022/RKI576	197140	OP837338	MPXV_OP837338	Virus_dsDNA_env; Poxviridae; Chordopoxvirinae; Orthopoxvirus; MPXV; 2; B	Monkeypox virus	Linear	OP837338 DEU 2022	West Af	3	2	Europe	DEU	Germany	B	Human	MPXV/Germany/2022/RKI576	2022	Homo sapiens	OP837338
OP837339	Wed Jun 26 18:51:23 CDT 2024	MPXV; 2; B_isolate MPXV/Germany/2022/RKI577	197139	OP837339	MPXV_OP837339	Virus_dsDNA_env; Poxviridae; Chordopoxvirinae; Orthopoxvirus; MPXV; 2; B	Monkeypox virus	Linear	OP837339 DEU 2022	West Af	3	2	Europe	DEU	Germany	B	Human	MPXV/Germany/2022/RKI577	2022	Homo sapiens	OP837339
OP837340	Wed Jun 26 18:51:23 CDT 2024	MPXV; 2; B_isolate MPXV/Germany/2022/RKI578	197136	OP837340	MPXV_OP837340	Virus_dsDNA_env; Poxviridae; Chordopoxvirinae; Orthopoxvirus; MPXV; 2; B	Monkeypox virus	Linear	OP837340 DEU 2022	West Af	3	2	Europe	DEU	Germany	B	Human	MPXV/Germany/2022/RKI578	2022	Homo sapiens	OP837340
OP837341	Wed Jun 26 18:51:23 CDT 2024	MPXV; 2; B_isolate MPXV/Germany/2022/RKI579	197139	OP837341	MPXV_OP837341	Virus_dsDNA_env; Poxviridae; Chordopoxvirinae; Orthopoxvirus; MPXV; 2; B	Monkeypox virus	Linear	OP837341 DEU 2022	West Af	3	2	Europe	DEU	Germany	B	Human	MPXV/Germany/2022/RKI579	2022	Homo sapiens	OP837341
OP837342	Wed Jun 26 18:51:23 CDT 2024	MPXV; 2; B_isolate MPXV/Germany/2022/RKI580	197139	OP837342	MPXV_OP837342	Virus_dsDNA_env; Poxviridae; Chordopoxvirinae; Orthopoxvirus; MPXV; 2; B	Monkeypox virus	Linear	OP837342 DEU 2022	West Af	3	2	Europe	DEU	Germany	B	Human	MPXV/Germany/2022/RKI580	2022	Homo sapiens	OP837342
OP837343	Wed Jun 26 18:51:23 CDT 2024	MPXV; 2; B_isolate MPXV/Germany/2022/RKI581	197140	OP837343	MPXV_OP837343	Virus_dsDNA_env; Poxviridae; Chordopoxvirinae; Orthopoxvirus; MPXV; 2; B	Monkeypox virus	Linear	OP837343 DEU 2022	West Af	3	2	Europe	DEU	Germany	B	Human	MPXV/Germany/2022/RKI581	2022	Homo sapiens	OP837343
OP837344	Wed Jun 26 18:51:23 CDT 2024	MPXV; 2; B_isolate MPXV/Germany/2022/RKI582	197139	OP837344	MPXV_OP837344	Virus_dsDNA_env; Poxviridae; Chordopoxvirinae; Orthopoxvirus; MPXV; 2; B	Monkeypox virus	Linear	OP837344 DEU 2022	West Af	3	2	Europe	DEU	Germany	B	Human	MPXV/Germany/2022/RKI582	2022	Homo sapiens	OP837344
OP837345	Wed Jun 26 18:51:23 CDT 2024	MPXV; 2; B_isolate MPXV/Germany/2022/RKI583	197140	OP837345	MPXV_OP837345	Virus_dsDNA_env; Poxviridae; Chordopoxvirinae; Orthopoxvirus; MPXV; 2; B	Monkeypox virus	Linear	OP837345 DEU 2022	West Af	3	2	Europe	DEU	Germany	B	Human	MPXV/Germany/2022/RKI583	2022	Homo sapiens	OP837345
OP837346	Wed Jun 26 18:51:23 CDT 2024	MPXV; 2; B_isolate MPXV/Germany/2022/RKI584	197140	OP837346	MPXV_OP837346	Virus_dsDNA_env; Poxviridae; Chordopoxvirinae; Orthopoxvirus; MPXV; 2; B	Monkeypox virus	Linear	OP837346 DEU 2022	West Af	3	2	Europe	DEU	Germany	B	Human	MPXV/Germany/2022/RKI584	2022	Homo sapiens	OP837346
OP837347	Wed Jun 26 18:51:23 CDT 2024	MPXV; 2; B_isolate MPXV/Germany/2022/RKI585	197139	OP837347	MPXV_OP837347	Virus_dsDNA_env; Poxviridae; Chordopoxvirinae; Orthopoxvirus; MPXV; 2; B	Monkeypox virus	Linear	OP837347 DEU 2022	West Af	3	2	Europe	DEU	Germany	B	Human	MPXV/Germany/2022/RKI585	2022	Homo sapiens	OP837347
OP837349	Wed Jun 26 18:51:23 CDT 2024	MPXV; 2; B_isolate MPXV/Germany/2022/RKI587	197140	OP837349	MPXV_OP837349	Virus_dsDNA_env; Poxviridae; Chordopoxvirinae; Orthopoxvirus; MPXV; 2; B	Monkeypox virus	Linear	OP837349 DEU 2022	West Af	3	2	Europe	DEU	Germany	B	Human	MPXV/Germany/2022/RKI587	2022	Homo sapiens	OP837349
OP837350	Wed Jun 26 18:51:23 CDT 2024	MPXV; 2; B_isolate MPXV/Germany/2022/RKI588	197139	OP837350	MPXV_OP837350	Virus_dsDNA_env; Poxviridae; Chordopoxvirinae; Orthopoxvirus; MPXV; 2; B	Monkeypox virus	Linear	OP837350 DEU 2022	West Af	3	2	Europe	DEU	Germany	B	Human	MPXV/Germany/2022/RKI588	2022	Homo sapiens	OP837350
OP837351	Wed Jun 26 18:51:23 CDT 2024	MPXV; 2; B_isolate MPXV/Germany/2022/RKI589	197139	OP837351	MPXV_OP837351	Virus_dsDNA_env; Poxviridae; Chordopoxvirinae; Orthopoxvirus; MPXV; 2; B	Monkeypox virus	Linear	OP837351 DEU 2022	West Af	3	2	Europe	DEU	Germany	B	Human	MPXV/Germany/2022/RKI589	2022	Homo sapiens	OP837351
OP837352	Wed Jun 26 18:51:23 CDT 2024	MPXV; 2; B_isolate MPXV/Germany/2022/RKI590	197139	OP837352	MPXV_OP837352	Virus_dsDNA_env; Poxviridae; Chordopoxvirinae; Orthopoxvirus; MPXV; 2; B	Monkeypox virus	Linear	OP837352 DEU 2022	West Af	3	2	Europe	DEU	Germany	B	Human	MPXV/Germany/2022/RKI590	2022	Homo sapiens	OP837352
OP837353	Wed Jun 26 18:51:23 CDT 2024	MPXV; 2; B_isolate MPXV/Germany/2022/RKI591	197140	OP837353	MPXV_OP837353	Virus_dsDNA_env; Poxviridae; Chordopoxvirinae; Orthopoxvirus; MPXV; 2; B	Monkeypox virus	Linear	OP837353 DEU 2022	West Af	3	2	Europe	DEU	Germany	B	Human	MPXV/Germany/2022/RKI591	2022	Homo sapiens	OP837353
OP837354	Wed Jun 26 18:51:23 CDT 2024	MPXV; 2; B_isolate MPXV/Germany/2022/RKI592	197139	OP837354	MPXV_OP837354	Virus_dsDNA_env; Poxviridae; Chordopoxvirinae; Orthopoxvirus; MPXV; 2; B	Monkeypox virus	Linear	OP837354 DEU 2022	West Af	3	2	Europe	DEU	Germany	B	Human	MPXV/Germany/2022/RKI592	2022	Homo sapiens	OP837354
OP838893	Wed Jun 26 18:51:23 CDT 2024	MPXV; 2; B_isolate ID6821	198009	OP838893	MPXV_OP838893	Virus_dsDNA_env; Poxviridae; Chordopoxvirinae; Orthopoxvirus; MPXV; 2; B	Monkeypox virus	Linear	OP838893 ITA 2022	West Af	3	2	Europe	ITA	Italy	B	Human	ID6821	2022	Homo sapiens	OP838893
OP879722	Wed Jun 26 18:51:23 CDT 2024	MPXV; 2; B_isolate NJ-MPXV-001	195578	OP879722	MPXV_OP879722	Virus_dsDNA_env; Poxviridae; Chordopoxvirinae; Orthopoxvirus; MPXV; 2; B	Monkeypox virus	Linear	OP879722 USA 2022	West Af	3	2	N America	USA	USA: NJ	B	Human	NJ-MPXV-001	2022	Homo sapiens	OP879722
OP879723	Wed Jun 26 18:51:23 CDT 2024	MPXV; 2; B_isolate NJ-MPXV-002	195581	OP879723	MPXV_OP879723	Virus_dsDNA_env; Poxviridae; Chordopoxvirinae; Orthopoxvirus; MPXV; 2; B	Monkeypox virus	Linear	OP879723 USA 2022	West Af	3	2	N America	USA	USA: NJ	B	Human	NJ-MPXV-002	2022	Homo sapiens	OP879723
OP881941	Wed Jun 26 18:51:23 CDT 2024	MPXV; 2; B_isolate MPXV_USA_2022_AL0001	197226	OP881941	MPXV_OP881941	Virus_dsDNA_env; Poxviridae; Chordopoxvirinae; Orthopoxvirus; MPXV; 2; B	Monkeypox virus	Linear	OP881941 USA 2022	West Af	3	2	N America	USA	USA: AL	B	Human	MPXV_USA_2022_AL0001	2022	Homo sapiens	OP881941
OP881942	Wed Jun 26 18:51:23 CDT 2024	MPXV; 2; B_isolate MPXV_USA_2022_CA0010	197172	OP881942	MPXV_OP881942	Virus_dsDNA_env; Poxviridae; Chordopoxvirinae; Orthopoxvirus; MPXV; 2; B	Monkeypox virus	Linear	OP881942 USA 2022	West Af	3	2	N America	USA	USA: CA	B	Human	MPXV_USA_2022_CA0010	2022	Homo sapiens	OP881942
OP881943	Wed Jun 26 18:51:23 CDT 2024	MPXV; 2; B_isolate MPXV_USA_2022_CA0011	197226	OP881943	MPXV_OP881943	Virus_dsDNA_env; Poxviridae; Chordopoxvirinae; Orthopoxvirus; MPXV; 2; B	Monkeypox virus	Linear	OP881943 USA 2022	West Af	3	2	N America	USA	USA: CA	B	Human	MPXV_USA_2022_CA0011	2022	Homo sapiens	OP881943
OP881944	Wed Jun 26 18:51:23 CDT 2024	MPXV; 2; B_isolate MPXV_USA_2022_DE0001	197137	OP881944	MPXV_OP881944	Virus_dsDNA_env; Poxviridae; Chordopoxvirinae; Orthopoxvirus; MPXV; 2; B	Monkeypox virus	Linear	OP881944 USA 2022	West Af	3	2	N America	USA	USA: DE	B	Human	MPXV_USA_2022_DE0001	2022	Homo sapiens	OP881944
OP881945	Wed Jun 26 18:51:23 CDT 2024	MPXV; 2; B_isolate MPXV_USA_2022_FL0026	197232	OP881945	MPXV_OP881945	Virus_dsDNA_env; Poxviridae; Chordopoxvirinae; Orthopoxvirus; MPXV; 2; B	Monkeypox virus	Linear	OP881945 USA 2022	West Af	3	2	N America	USA	USA: FL	B	Human	MPXV_USA_2022_FL0026	2022	Homo sapiens	OP881945
OP881946	Wed Jun 26 18:51:23 CDT 2024	MPXV; 2; B_isolate MPXV_USA_2022_FL0027	197178	OP881946	MPXV_OP881946	Virus_dsDNA_env; Poxviridae; Chordopoxvirinae; Orthopoxvirus; MPXV; 2; B	Monkeypox virus	Linear	OP881946 USA 2022	West Af	3	2	N America	USA	USA: FL	B	Human	MPXV_USA_2022_FL0027	2022	Homo sapiens	OP881946
OP881947	Wed Jun 26 18:51:23 CDT 2024	MPXV; 2; B_isolate MPXV_USA_2022_LA0002	197241	OP881947	MPXV_OP881947	Virus_dsDNA_env; Poxviridae; Chordopoxvirinae; Orthopoxvirus; MPXV; 2; B	Monkeypox virus	Linear	OP881947 USA 2022	West Af	3	2	N America	USA	USA: LA	B	Human	MPXV_USA_2022_LA0002	2022	Homo sapiens	OP881947
OP881948	Wed Jun 26 18:51:23 CDT 2024	MPXV; 2; B_isolate MPXV_USA_2022_MD0006	197181	OP881948	MPXV_OP881948	Virus_dsDNA_env; Poxviridae; Chordopoxvirinae; Orthopoxvirus; MPXV; 2; B	Monkeypox virus	Linear	OP881948 USA 2022	West Af	3	2	N America	USA	USA: MD	B	Human	MPXV_USA_2022_MD0006	2022	Homo sapiens	OP881948
OP881949	Wed Jun 26 18:51:23 CDT 2024	MPXV; 2; B_isolate MPXV_USA_2022_MD0007	197158	OP881949	MPXV_OP881949	Virus_dsDNA_env; Poxviridae; Chordopoxvirinae; Orthopoxvirus; MPXV; 2; B	Monkeypox virus	Linear	OP881949 USA 2022	West Af	3	2	N America	USA	USA: MD	B	Human	MPXV_USA_2022_MD0007	2022	Homo sapiens	OP881949
OP881950	Wed Jun 26 18:51:23 CDT 2024	MPXV; 2; B_isolate MPXV_USA_2022_MO0001	197186	OP881950	MPXV_OP881950	Virus_dsDNA_env; Poxviridae; Chordopoxvirinae; Orthopoxvirus; MPXV; 2; B	Monkeypox virus	Linear	OP881950 USA 2022	West Af	3	2	N America	USA	USA: MO	B	Human	MPXV_USA_2022_MO0001	2022	Homo sapiens	OP881950
OP881951	Wed Jun 26 18:51:23 CDT 2024	MPXV; 2; B_isolate MPXV_USA_2022_TX0029	197186	OP881951	MPXV_OP881951	Virus_dsDNA_env; Poxviridae; Chordopoxvirinae; Orthopoxvirus; MPXV; 2; B	Monkeypox virus	Linear	OP881951 USA 2022	West Af	3	2	N America	USA	USA: TX	B	Human	MPXV_USA_2022_TX0029	2022	Homo sapiens	OP881951
OP881952	Wed Jun 26 18:51:23 CDT 2024	MPXV; 2; B_isolate MPXV_USA_2022_TX0030	197183	OP881952	MPXV_OP881952	Virus_dsDNA_env; Poxviridae; Chordopoxvirinae; Orthopoxvirus; MPXV; 2; B	Monkeypox virus	Linear	OP881952 USA 2022	West Af	3	2	N America	USA	USA: TX	B	Human	MPXV_USA_2022_TX0030	2022	Homo sapiens	OP881952
OP881953	Wed Jun 26 18:51:23 CDT 2024	MPXV; 2; B_isolate MPXV_USA_2022_TX0031	197215	OP881953	MPXV_OP881953	Virus_dsDNA_env; Poxviridae; Chordopoxvirinae; Orthopoxvirus; MPXV; 2; B	Monkeypox virus	Linear	OP881953 USA 2022	West Af	3	2	N America	USA	USA: TX	B	Human	MPXV_USA_2022_TX0031	2022	Homo sapiens	OP881953
OP881954	Wed Jun 26 18:51:23 CDT 2024	MPXV; 2; B_isolate MPXV_USA_2022_VA0009	197183	OP881954	MPXV_OP881954	Virus_dsDNA_env; Poxviridae; Chordopoxvirinae; Orthopoxvirus; MPXV; 2; B	Monkeypox virus	Linear	OP881954 USA 2022	West Af	3	2	N America	USA	USA: VA	B	Human	MPXV_USA_2022_VA0009	2022	Homo sapiens	OP881954
OP881955	Wed Jun 26 18:51:23 CDT 2024	MPXV; 2; B_isolate MPXV_USA_2022_VA0010	197166	OP881955	MPXV_OP881955	Virus_dsDNA_env; Poxviridae; Chordopoxvirinae; Orthopoxvirus; MPXV; 2; B	Monkeypox virus	Linear	OP881955 USA 2022	West Af	3	2	N America	USA	USA: VA	B	Human	MPXV_USA_2022_VA0010	2022	Homo sapiens	OP881955
OP881956	Wed Jun 26 18:51:23 CDT 2024	MPXV; 2; B_isolate MPXV_USA_2022_VT0001	197180	OP881956	MPXV_OP881956	Virus_dsDNA_env; Poxviridae; Chordopoxvirinae; Orthopoxvirus; MPXV; 2; B	Monkeypox virus	Linear	OP881956 USA 2022	West Af	3	2	N America	USA	USA: VT	B	Human	MPXV_USA_2022_VT0001	2022	Homo sapiens	OP881956
OQ054218	Wed Jun 26 18:51:23 CDT 2024	MPXV; 2; B_isolate MPXV_USA_2022_GA0019	197320	OQ054218	MPXV_OQ054218	Virus_dsDNA_env; Poxviridae; Chordopoxvirinae; Orthopoxvirus; MPXV; 2; B	Monkeypox virus	Linear	OQ054218 USA 2022	West Af	3	2	N America	USA	USA: GA	B	Human	MPXV_USA_2022_GA0019	2022	Homo sapiens	OQ054218
OQ054219	Wed Jun 26 18:51:23 CDT 2024	MPXV; 2; B_isolate MPXV_USA_2022_GA0020	197156	OQ054219	MPXV_OQ054219	Virus_dsDNA_env; Poxviridae; Chordopoxvirinae; Orthopoxvirus; MPXV; 2; B	Monkeypox virus	Linear	OQ054219 USA 2022	West Af	3	2	N America	USA	USA: GA	B	Human	MPXV_USA_2022_GA0020	2022	Homo sapiens	OQ054219
OQ054220	Wed Jun 26 18:51:23 CDT 2024	MPXV; 2; B_isolate MPXV_USA_2022_IA0001	197198	OQ054220	MPXV_OQ054220	Virus_dsDNA_env; Poxviridae; Chordopoxvirinae; Orthopoxvirus; MPXV; 2; B	Monkeypox virus	Linear	OQ054220 USA 2022	West Af	3	2	N America	USA	USA: IA	B	Human	MPXV_USA_2022_IA0001	2022	Homo sapiens	OQ054220
OQ054221	Wed Jun 26 18:51:23 CDT 2024	MPXV; 2; B_isolate MPXV_USA_2022_IA0002	197161	OQ054221	MPXV_OQ054221	Virus_dsDNA_env; Poxviridae; Chordopoxvirinae; Orthopoxvirus; MPXV; 2; B	Monkeypox virus	Linear	OQ054221 USA 2022	West Af	3	2	N America	USA	USA: IA	B	Human	MPXV_USA_2022_IA0002	2022	Homo sapiens	OQ054221
OQ054222	Wed Jun 26 18:51:23 CDT 2024	MPXV; 2; B_isolate MPXV_USA_2022_IA0003	197159	OQ054222	MPXV_OQ054222	Virus_dsDNA_env; Poxviridae; Chordopoxvirinae; Orthopoxvirus; MPXV; 2; B	Monkeypox virus	Linear	OQ054222 USA 2022	West Af	3	2	N America	USA	USA: IA	B	Human	MPXV_USA_2022_IA0003	2022	Homo sapiens	OQ054222
OQ054223	Wed Jun 26 18:51:23 CDT 2024	MPXV; 2; B_isolate MPXV_USA_2022_IL0029	197245	OQ054223	MPXV_OQ054223	Virus_dsDNA_env; Poxviridae; Chordopoxvirinae; Orthopoxvirus; MPXV; 2; B	Monkeypox virus	Linear	OQ054223 USA 2022	West Af	3	2	N America	USA	USA: IL	B	Human	MPXV_USA_2022_IL0029	2022	Homo sapiens	OQ054223
OQ054224	Wed Jun 26 18:51:23 CDT 2024	MPXV; 2; B_isolate MPXV_USA_2022_IL0030	197161	OQ054224	MPXV_OQ054224	Virus_dsDNA_env; Poxviridae; Chordopoxvirinae; Orthopoxvirus; MPXV; 2; B	Monkeypox virus	Linear	OQ054224 USA 2022	West Af	3	2	N America	USA	USA: IL	B	Human	MPXV_USA_2022_IL0030	2022	Homo sapiens	OQ054224
OQ054225	Wed Jun 26 18:51:23 CDT 2024	MPXV; 2; B_isolate MPXV_USA_2022_NC0010	197159	OQ054225	MPXV_OQ054225	Virus_dsDNA_env; Poxviridae; Chordopoxvirinae; Orthopoxvirus; MPXV; 2; B	Monkeypox virus	Linear	OQ054225 USA 2022	West Af	3	2	N America	USA	USA: NC	B	Human	MPXV_USA_2022_NC0010	2022	Homo sapiens	OQ054225
OQ054226	Wed Jun 26 18:51:23 CDT 2024	MPXV; 2; B_isolate MPXV_USA_2022_NC0011	197155	OQ054226	MPXV_OQ054226	Virus_dsDNA_env; Poxviridae; Chordopoxvirinae; Orthopoxvirus; MPXV; 2; B	Monkeypox virus	Linear	OQ054226 USA 2022	West Af	3	2	N America	USA	USA: NC	B	Human	MPXV_USA_2022_NC0011	2022	Homo sapiens	OQ054226
OQ054227	Wed Jun 26 18:51:23 CDT 2024	MPXV; 2; B_isolate MPXV_USA_2022_NC0012	197187	OQ054227	MPXV_OQ054227	Virus_dsDNA_env; Poxviridae; Chordopoxvirinae; Orthopoxvirus; MPXV; 2; B	Monkeypox virus	Linear	OQ054227 USA 2022	West Af	3	2	N America	USA	USA: NC	B	Human	MPXV_USA_2022_NC0012	2022	Homo sapiens	OQ054227
OQ054228	Wed Jun 26 18:51:23 CDT 2024	MPXV; 2; B_isolate MPXV_USA_2022_NY0027	197151	OQ054228	MPXV_OQ054228	Virus_dsDNA_env; Poxviridae; Chordopoxvirinae; Orthopoxvirus; MPXV; 2; B	Monkeypox virus	Linear	OQ054228 USA 2022	West Af	3	2	N America	USA	USA: NY	B	Human	MPXV_USA_2022_NY0027	2022	Homo sapiens	OQ054228
OQ054229	Wed Jun 26 18:51:23 CDT 2024	MPXV; 2; B_isolate MPXV_USA_2022_OR0006	197148	OQ054229	MPXV_OQ054229	Virus_dsDNA_env; Poxviridae; Chordopoxvirinae; Orthopoxvirus; MPXV; 2; B	Monkeypox virus	Linear	OQ054229 USA 2022	West Af	3	2	N America	USA	USA: OR	B	Human	MPXV_USA_2022_OR0006	2022	Homo sapiens	OQ054229
OQ054230	Wed Jun 26 18:51:23 CDT 2024	MPXV; 2; B_isolate MPXV_USA_2022_PA0009	197169	OQ054230	MPXV_OQ054230	Virus_dsDNA_env; Poxviridae; Chordopoxvirinae; Orthopoxvirus; MPXV; 2; B	Monkeypox virus	Linear	OQ054230 USA 2022	West Af	3	2	N America	USA	USA: PA	B	Human	MPXV_USA_2022_PA0009	2022	Homo sapiens	OQ054230
OQ054231	Wed Jun 26 18:51:23 CDT 2024	MPXV; 2; B_isolate MPXV_USA_2022_PA0010	197159	OQ054231	MPXV_OQ054231	Virus_dsDNA_env; Poxviridae; Chordopoxvirinae; Orthopoxvirus; MPXV; 2; B	Monkeypox virus	Linear	OQ054231 USA 2022	West Af	3	2	N America	USA	USA: PA	B	Human	MPXV_USA_2022_PA0010	2022	Homo sapiens	OQ054231
OQ054232	Wed Jun 26 18:51:23 CDT 2024	MPXV; 2; B_isolate MPXV_USA_2022_PA0011	197150	OQ054232	MPXV_OQ054232	Virus_dsDNA_env; Poxviridae; Chordopoxvirinae; Orthopoxvirus; MPXV; 2; B	Monkeypox virus	Linear	OQ054232 USA 2022	West Af	3	2	N America	USA	USA: PA	B	Human	MPXV_USA_2022_PA0011	2022	Homo sapiens	OQ054232
OQ054233	Wed Jun 26 18:51:23 CDT 2024	MPXV; 2; B_isolate MPXV_USA_2022_PA0012	197184	OQ054233	MPXV_OQ054233	Virus_dsDNA_env; Poxviridae; Chordopoxvirinae; Orthopoxvirus; MPXV; 2; B	Monkeypox virus	Linear	OQ054233 USA 2022	West Af	3	2	N America	USA	USA: PA	B	Human	MPXV_USA_2022_PA0012	2022	Homo sapiens	OQ054233
OQ054234	Wed Jun 26 18:51:23 CDT 2024	MPXV; 2; B_isolate MPXV_USA_2022_PA0013	197154	OQ054234	MPXV_OQ054234	Virus_dsDNA_env; Poxviridae; Chordopoxvirinae; Orthopoxvirus; MPXV; 2; B	Monkeypox virus	Linear	OQ054234 USA 2022	West Af	3	2	N America	USA	USA: PA	B	Human	MPXV_USA_2022_PA0013	2022	Homo sapiens	OQ054234
OQ054235	Wed Jun 26 18:51:23 CDT 2024	MPXV; 2; B_isolate MPXV_USA_2022_SC0006	197155	OQ054235	MPXV_OQ054235	Virus_dsDNA_env; Poxviridae; Chordopoxvirinae; Orthopoxvirus; MPXV; 2; B	Monkeypox virus	Linear	OQ054235 USA 2022	West Af	3	2	N America	USA	USA: SC	B	Human	MPXV_USA_2022_SC0006	2022	Homo sapiens	OQ054235
OQ054236	Wed Jun 26 18:51:23 CDT 2024	MPXV; 2; B_isolate MPXV_USA_2022_TN0009	197210	OQ054236	MPXV_OQ054236	Virus_dsDNA_env; Poxviridae; Chordopoxvirinae; Orthopoxvirus; MPXV; 2; B	Monkeypox virus	Linear	OQ054236 USA 2022	West Af	3	2	N America	USA	USA: TN	B	Human	MPXV_USA_2022_TN0009	2022	Homo sapiens	OQ054236
OQ054237	Wed Jun 26 18:51:23 CDT 2024	MPXV; 2; B_isolate MPXV_USA_2022_TN0010	197174	OQ054237	MPXV_OQ054237	Virus_dsDNA_env; Poxviridae; Chordopoxvirinae; Orthopoxvirus; MPXV; 2; B	Monkeypox virus	Linear	OQ054237 USA 2022	West Af	3	2	N America	USA	USA: TN	B	Human	MPXV_USA_2022_TN0010	2022	Homo sapiens	OQ054237
OQ054238	Wed Jun 26 18:51:23 CDT 2024	MPXV; 2; B_isolate MPXV_USA_2022_TX0016	197143	OQ054238	MPXV_OQ054238	Virus_dsDNA_env; Poxviridae; Chordopoxvirinae; Orthopoxvirus; MPXV; 2; B	Monkeypox virus	Linear	OQ054238 USA 2022	West Af	3	2	N America	USA	USA: TX	B	Human	MPXV_USA_2022_TX0016	2022	Homo sapiens	OQ054238
OQ054239	Wed Jun 26 18:51:23 CDT 2024	MPXV; 2; B_isolate MPXV_USA_2022_TX0017	197217	OQ054239	MPXV_OQ054239	Virus_dsDNA_env; Poxviridae; Chordopoxvirinae; Orthopoxvirus; MPXV; 2; B	Monkeypox virus	Linear	OQ054239 USA 2022	West Af	3	2	N America	USA	USA: TX	B	Human	MPXV_USA_2022_TX0017	2022	Homo sapiens	OQ054239
OQ054240	Wed Jun 26 18:51:23 CDT 2024	MPXV; 2; B_isolate MPXV_USA_2022_TX0027	197207	OQ054240	MPXV_OQ054240	Virus_dsDNA_env; Poxviridae; Chordopoxvirinae; Orthopoxvirus; MPXV; 2; B	Monkeypox virus	Linear	OQ054240 USA 2022	West Af	3	2	N America	USA	USA: TX	B	Human	MPXV_USA_2022_TX0027	2022	Homo sapiens	OQ054240
OQ054241	Wed Jun 26 18:51:23 CDT 2024	MPXV; 2; B_isolate MPXV_USA_2022_AK0001	197227	OQ054241	MPXV_OQ054241	Virus_dsDNA_env; Poxviridae; Chordopoxvirinae; Orthopoxvirus; MPXV; 2; B	Monkeypox virus	Linear	OQ054241 USA 2022	West Af	3	2	N America	USA	USA: AK	B	Human	MPXV_USA_2022_AK0001	2022	Homo sapiens	OQ054241
OQ054242	Wed Jun 26 18:51:23 CDT 2024	MPXV; 2; B_isolate MPXV_USA_2022_AK0002	197182	OQ054242	MPXV_OQ054242	Virus_dsDNA_env; Poxviridae; Chordopoxvirinae; Orthopoxvirus; MPXV; 2; B	Monkeypox virus	Linear	OQ054242 USA 2022	West Af	3	2	N America	USA	USA: AK	B	Human	MPXV_USA_2022_AK0002	2022	Homo sapiens	OQ054242
OQ054243	Wed Jun 26 18:51:23 CDT 2024	MPXV; 2; B_isolate MPXV_USA_2022_AZ0007	197151	OQ054243	MPXV_OQ054243	Virus_dsDNA_env; Poxviridae; Chordopoxvirinae; Orthopoxvirus; MPXV; 2; B	Monkeypox virus	Linear	OQ054243 USA 2022	West Af	3	2	N America	USA	USA: AZ	B	Human	MPXV_USA_2022_AZ0007	2022	Homo sapiens	OQ054243
OQ054244	Wed Jun 26 18:51:23 CDT 2024	MPXV; 2; B_isolate MPXV_USA_2022_CA0029	197154	OQ054244	MPXV_OQ054244	Virus_dsDNA_env; Poxviridae; Chordopoxvirinae; Orthopoxvirus; MPXV; 2; B	Monkeypox virus	Linear	OQ054244 USA 2022	West Af	3	2	N America	USA	USA: CA	B	Human	MPXV_USA_2022_CA0029	2022	Homo sapiens	OQ054244
OQ054245	Wed Jun 26 18:51:23 CDT 2024	MPXV; 2; B_isolate MPXV_USA_2022_CA0030	197159	OQ054245	MPXV_OQ054245	Virus_dsDNA_env; Poxviridae; Chordopoxvirinae; Orthopoxvirus; MPXV; 2; B	Monkeypox virus	Linear	OQ054245 USA 2022	West Af	3	2	N America	USA	USA: CA	B	Human	MPXV_USA_2022_CA0030	2022	Homo sapiens	OQ054245
OQ054246	Wed Jun 26 18:51:23 CDT 2024	MPXV; 2; B_isolate MPXV_USA_2022_FL0028	197270	OQ054246	MPXV_OQ054246	Virus_dsDNA_env; Poxviridae; Chordopoxvirinae; Orthopoxvirus; MPXV; 2; B	Monkeypox virus	Linear	OQ054246 USA 2022	West Af	3	2	N America	USA	USA: FL	B	Human	MPXV_USA_2022_FL0028	2022	Homo sapiens	OQ054246
OQ054247	Wed Jun 26 18:51:23 CDT 2024	MPXV; 2; B_isolate MPXV_USA_2022_FL0029	197190	OQ054247	MPXV_OQ054247	Virus_dsDNA_env; Poxviridae; Chordopoxvirinae; Orthopoxvirus; MPXV; 2; B	Monkeypox virus	Linear	OQ054247 USA 2022	West Af	3	2	N America	USA	USA: FL	B	Human	MPXV_USA_2022_FL0029	2022	Homo sapiens	OQ054247
OQ099604	Wed Jun 26 18:51:23 CDT 2024	MPXV; 2; B_isolate MPXV_USA_2022_NY0016	197185	OQ099604	MPXV_OQ099604	Virus_dsDNA_env; Poxviridae; Chordopoxvirinae; Orthopoxvirus; MPXV; 2; B	Monkeypox virus	Linear	OQ099604 USA 2022	West Af	3	2	N America	USA	USA: NY	B	Human	MPXV_USA_2022_NY0016	2022	Homo sapiens	OQ099604
OQ099605	Wed Jun 26 18:51:23 CDT 2024	MPXV; 2; B_isolate MPXV_USA_2022_NY0017	197187	OQ099605	MPXV_OQ099605	Virus_dsDNA_env; Poxviridae; Chordopoxvirinae; Orthopoxvirus; MPXV; 2; B	Monkeypox virus	Linear	OQ099605 USA 2022	West Af	3	2	N America	USA	USA: NY	B	Human	MPXV_USA_2022_NY0017	2022	Homo sapiens	OQ099605
OQ099606	Wed Jun 26 18:51:23 CDT 2024	MPXV; 2; B_isolate MPXV_USA_2022_DC0014	197201	OQ099606	MPXV_OQ099606	Virus_dsDNA_env; Poxviridae; Chordopoxvirinae; Orthopoxvirus; MPXV; 2; B	Monkeypox virus	Linear	OQ099606 USA 2022	West Af	3	2	N America	USA	USA: DC	B	Human	MPXV_USA_2022_DC0014	2022	Homo sapiens	OQ099606
OQ099607	Wed Jun 26 18:51:23 CDT 2024	MPXV; 2; B_isolate MPXV_USA_2022_FL0010	197253	OQ099607	MPXV_OQ099607	Virus_dsDNA_env; Poxviridae; Chordopoxvirinae; Orthopoxvirus; MPXV; 2; B	Monkeypox virus	Linear	OQ099607 USA 2022	West Af	3	2	N America	USA	USA: FL	B	Human	MPXV_USA_2022_FL0010	2022	Homo sapiens	OQ099607
OQ099608	Wed Jun 26 18:51:23 CDT 2024	MPXV; 2; B_isolate MPXV_USA_2022_IL0026	197177	OQ099608	MPXV_OQ099608	Virus_dsDNA_env; Poxviridae; Chordopoxvirinae; Orthopoxvirus; MPXV; 2; B	Monkeypox virus	Linear	OQ099608 USA 2022	West Af	3	2	N America	USA	USA: IL	B	Human	MPXV_USA_2022_IL0026	2022	Homo sapiens	OQ099608
OQ099609	Wed Jun 26 18:51:23 CDT 2024	MPXV; 2; B_isolate MPXV_USA_2022_IL0031	197171	OQ099609	MPXV_OQ099609	Virus_dsDNA_env; Poxviridae; Chordopoxvirinae; Orthopoxvirus; MPXV; 2; B	Monkeypox virus	Linear	OQ099609 USA 2022	West Af	3	2	N America	USA	USA: IL	B	Human	MPXV_USA_2022_IL0031	2022	Homo sapiens	OQ099609
OQ121956	Wed Jun 26 18:51:23 CDT 2024	MPXV; 2; B_isolate MPXV/USA/IL-RIPHL-MPXV_10012/2022	196445	OQ121956	MPXV_OQ121956	Virus_dsDNA_env; Poxviridae; Chordopoxvirinae; Orthopoxvirus; MPXV; 2; B	Monkeypox virus	Linear	OQ121956 USA 2022	West Af	3	2	N America	USA	USA: IL	B	Human	MPXV/USA/IL-RIPHL-MPXV_10012/2022	2022	Homo sapiens	OQ121956
OQ121962	Wed Jun 26 18:51:23 CDT 2024	MPXV; 2; B_isolate MPXV/USA/IL-RIPHL-MPXV_10018/2022	196432	OQ121962	MPXV_OQ121962	Virus_dsDNA_env; Poxviridae; Chordopoxvirinae; Orthopoxvirus; MPXV; 2; B	Monkeypox virus	Linear	OQ121962 USA 2022	West Af	3	2	N America	USA	USA: IL	B	Human	MPXV/USA/IL-RIPHL-MPXV_10018/2022	2022	Homo sapiens	OQ121962
OQ249660	Wed Jun 26 18:51:23 CDT 2024	MPXV; 2; B_isolate CIBU-220035	197205	OQ249660	MPXV_OQ249660	Virus_dsDNA_env; Poxviridae; Chordopoxvirinae; Orthopoxvirus; MPXV; 2; B	Monkeypox virus	Linear	OQ249660 FRA 2022	West Af	3	2	Europe	FRA	France	B	Human	CIBU-220035	2022	Homo sapiens	OQ249660
OQ249661	Wed Jun 26 18:51:23 CDT 2024	MPXV; 2; B_isolate CMIP-P0	197205	OQ249661	MPXV_OQ249661	Virus_dsDNA_env; Poxviridae; Chordopoxvirinae; Orthopoxvirus; MPXV; 2; B	Monkeypox virus	Linear	OQ249661 FRA 2022	West Af	3	2	Europe	FRA	France	B	Human	CMIP-P0	2022	Homo sapiens	OQ249661
OQ261694	Wed Jun 26 18:51:23 CDT 2024	MPXV; 2; B_isolate MPXV-ROK-P3-2022	197173	OQ261694	MPXV_OQ261694	Virus_dsDNA_env; Poxviridae; Chordopoxvirinae; Orthopoxvirus; MPXV; 2; B	Monkeypox virus	Linear	OQ261694 KOR 2022	West Af	2	2	Asia	KOR	South Korea	B	Human	MPXV-ROK-P3-2022	2022	Homo sapiens	OQ261694
OQ261707	Wed Jun 26 18:51:23 CDT 2024	MPXV; 2; B_isolate ANT-LDSP-ANT-MPX-28354C	197065	OQ261707	MPXV_OQ261707	Virus_dsDNA_env; Poxviridae; Chordopoxvirinae; Orthopoxvirus; MPXV; 2; B	Monkeypox virus	Linear	OQ261707 COL 2022	West Af	3	2	S America	COL	Colombia: Antioquia	B	Human	ANT-LDSP-ANT-MPX-28354C	2022	Homo sapiens	OQ261707
OQ320438	Wed Jun 26 18:51:23 CDT 2024	MPXV; 2; B_isolate MPXV_USA_2022_TX0037	197200	OQ320438	MPXV_OQ320438	Virus_dsDNA_env; Poxviridae; Chordopoxvirinae; Orthopoxvirus; MPXV; 2; B	Monkeypox virus	Linear	OQ320438 USA 2022	West Af	3	2	N America	USA	USA: TX	B	Human	MPXV_USA_2022_TX0037	2022	Homo sapiens	OQ320438
OQ320439	Wed Jun 26 18:51:23 CDT 2024	MPXV; 2; B_isolate MPXV_USA_2022_TX0038	197229	OQ320439	MPXV_OQ320439	Virus_dsDNA_env; Poxviridae; Chordopoxvirinae; Orthopoxvirus; MPXV; 2; B	Monkeypox virus	Linear	OQ320439 USA 2022	West Af	3	2	N America	USA	USA: TX	B	Human	MPXV_USA_2022_TX0038	2022	Homo sapiens	OQ320439
OQ320440	Wed Jun 26 18:51:23 CDT 2024	MPXV; 2; B_isolate MPXV_USA_2022_TX0039	197186	OQ320440	MPXV_OQ320440	Virus_dsDNA_env; Poxviridae; Chordopoxvirinae; Orthopoxvirus; MPXV; 2; B	Monkeypox virus	Linear	OQ320440 USA 2022	West Af	3	2	N America	USA	USA: TX	B	Human	MPXV_USA_2022_TX0039	2022	Homo sapiens	OQ320440
OQ320441	Wed Jun 26 18:51:23 CDT 2024	MPXV; 2; B_isolate MPXV_USA_2022_TX0040	197151	OQ320441	MPXV_OQ320441	Virus_dsDNA_env; Poxviridae; Chordopoxvirinae; Orthopoxvirus; MPXV; 2; B	Monkeypox virus	Linear	OQ320441 USA 2022	West Af	3	2	N America	USA	USA: TX	B	Human	MPXV_USA_2022_TX0040	2022	Homo sapiens	OQ320441
OQ320442	Wed Jun 26 18:51:23 CDT 2024	MPXV; 2; B_isolate MPXV_USA_2022_TX0041	197216	OQ320442	MPXV_OQ320442	Virus_dsDNA_env; Poxviridae; Chordopoxvirinae; Orthopoxvirus; MPXV; 2; B	Monkeypox virus	Linear	OQ320442 USA 2022	West Af	3	2	N America	USA	USA: TX	B	Human	MPXV_USA_2022_TX0041	2022	Homo sapiens	OQ320442
OQ320443	Wed Jun 26 18:51:23 CDT 2024	MPXV; 2; B_isolate MPXV_USA_2022_TX0042	197175	OQ320443	MPXV_OQ320443	Virus_dsDNA_env; Poxviridae; Chordopoxvirinae; Orthopoxvirus; MPXV; 2; B	Monkeypox virus	Linear	OQ320443 USA 2022	West Af	3	2	N America	USA	USA: TX	B	Human	MPXV_USA_2022_TX0042	2022	Homo sapiens	OQ320443
OQ320444	Wed Jun 26 18:51:23 CDT 2024	MPXV; 2; B_isolate MPXV_USA_2022_UT0004	197232	OQ320444	MPXV_OQ320444	Virus_dsDNA_env; Poxviridae; Chordopoxvirinae; Orthopoxvirus; MPXV; 2; B	Monkeypox virus	Linear	OQ320444 USA 2022	West Af	3	2	N America	USA	USA: UT	B	Human	MPXV_USA_2022_UT0004	2022	Homo sapiens	OQ320444
OQ320445	Wed Jun 26 18:51:23 CDT 2024	MPXV; 2; B_isolate MPXV_USA_2022_UT0005	197219	OQ320445	MPXV_OQ320445	Virus_dsDNA_env; Poxviridae; Chordopoxvirinae; Orthopoxvirus; MPXV; 2; B	Monkeypox virus	Linear	OQ320445 USA 2022	West Af	3	2	N America	USA	USA: UT	B	Human	MPXV_USA_2022_UT0005	2022	Homo sapiens	OQ320445
OQ320446	Wed Jun 26 18:51:23 CDT 2024	MPXV; 2; B_isolate MPXV_USA_2022_DC0017	197217	OQ320446	MPXV_OQ320446	Virus_dsDNA_env; Poxviridae; Chordopoxvirinae; Orthopoxvirus; MPXV; 2; B	Monkeypox virus	Linear	OQ320446 USA 2022	West Af	3	2	N America	USA	USA: DC	B	Human	MPXV_USA_2022_DC0017	2022	Homo sapiens	OQ320446
OQ320447	Wed Jun 26 18:51:23 CDT 2024	MPXV; 2; B_isolate MPXV_USA_2022_DC0018	197157	OQ320447	MPXV_OQ320447	Virus_dsDNA_env; Poxviridae; Chordopoxvirinae; Orthopoxvirus; MPXV; 2; B	Monkeypox virus	Linear	OQ320447 USA 2022	West Af	3	2	N America	USA	USA: DC	B	Human	MPXV_USA_2022_DC0018	2022	Homo sapiens	OQ320447
OQ320448	Wed Jun 26 18:51:23 CDT 2024	MPXV; 2; B_isolate MPXV_USA_2022_DC0019	197147	OQ320448	MPXV_OQ320448	Virus_dsDNA_env; Poxviridae; Chordopoxvirinae; Orthopoxvirus; MPXV; 2; B	Monkeypox virus	Linear	OQ320448 USA 2022	West Af	3	2	N America	USA	USA: DC	B	Human	MPXV_USA_2022_DC0019	2022	Homo sapiens	OQ320448
OQ320449	Wed Jun 26 18:51:23 CDT 2024	MPXV; 2; B_isolate MPXV_USA_2022_DC0020	197216	OQ320449	MPXV_OQ320449	Virus_dsDNA_env; Poxviridae; Chordopoxvirinae; Orthopoxvirus; MPXV; 2; B	Monkeypox virus	Linear	OQ320449 USA 2022	West Af	3	2	N America	USA	USA: DC	B	Human	MPXV_USA_2022_DC0020	2022	Homo sapiens	OQ320449
OQ320450	Wed Jun 26 18:51:23 CDT 2024	MPXV; 2; B_isolate MPXV_USA_2022_DC0021	197153	OQ320450	MPXV_OQ320450	Virus_dsDNA_env; Poxviridae; Chordopoxvirinae; Orthopoxvirus; MPXV; 2; B	Monkeypox virus	Linear	OQ320450 USA 2022	West Af	3	2	N America	USA	USA: DC	B	Human	MPXV_USA_2022_DC0021	2022	Homo sapiens	OQ320450
OQ320451	Wed Jun 26 18:51:23 CDT 2024	MPXV; 2; B_isolate MPXV_USA_2022_DC0022	197154	OQ320451	MPXV_OQ320451	Virus_dsDNA_env; Poxviridae; Chordopoxvirinae; Orthopoxvirus; MPXV; 2; B	Monkeypox virus	Linear	OQ320451 USA 2022	West Af	3	2	N America	USA	USA: DC	B	Human	MPXV_USA_2022_DC0022	2022	Homo sapiens	OQ320451
OQ320452	Wed Jun 26 18:51:23 CDT 2024	MPXV; 2; B_isolate MPXV_USA_2022_DC0023	197185	OQ320452	MPXV_OQ320452	Virus_dsDNA_env; Poxviridae; Chordopoxvirinae; Orthopoxvirus; MPXV; 2; B	Monkeypox virus	Linear	OQ320452 USA 2022	West Af	3	2	N America	USA	USA: DC	B	Human	MPXV_USA_2022_DC0023	2022	Homo sapiens	OQ320452
OQ320453	Wed Jun 26 18:51:23 CDT 2024	MPXV; 2; B_isolate MPXV_USA_2022_KS0001	197190	OQ320453	MPXV_OQ320453	Virus_dsDNA_env; Poxviridae; Chordopoxvirinae; Orthopoxvirus; MPXV; 2; B	Monkeypox virus	Linear	OQ320453 USA 2022	West Af	3	2	N America	USA	USA: KS	B	Human	MPXV_USA_2022_KS0001	2022	Homo sapiens	OQ320453
OQ320454	Wed Jun 26 18:51:23 CDT 2024	MPXV; 2; B_isolate MPXV_USA_2022_KS0002	197156	OQ320454	MPXV_OQ320454	Virus_dsDNA_env; Poxviridae; Chordopoxvirinae; Orthopoxvirus; MPXV; 2; B	Monkeypox virus	Linear	OQ320454 USA 2022	West Af	3	2	N America	USA	USA: KS	B	Human	MPXV_USA_2022_KS0002	2022	Homo sapiens	OQ320454
OQ320455	Wed Jun 26 18:51:23 CDT 2024	MPXV; 2; B_isolate MPXV_USA_2022_KS0003	197214	OQ320455	MPXV_OQ320455	Virus_dsDNA_env; Poxviridae; Chordopoxvirinae; Orthopoxvirus; MPXV; 2; B	Monkeypox virus	Linear	OQ320455 USA 2022	West Af	3	2	N America	USA	USA: KS	B	Human	MPXV_USA_2022_KS0003	2022	Homo sapiens	OQ320455
OQ320456	Wed Jun 26 18:51:23 CDT 2024	MPXV; 2; B_isolate MPXV_USA_2022_KS0004	197210	OQ320456	MPXV_OQ320456	Virus_dsDNA_env; Poxviridae; Chordopoxvirinae; Orthopoxvirus; MPXV; 2; B	Monkeypox virus	Linear	OQ320456 USA 2022	West Af	3	2	N America	USA	USA: KS	B	Human	MPXV_USA_2022_KS0004	2022	Homo sapiens	OQ320456
OQ320457	Wed Jun 26 18:51:23 CDT 2024	MPXV; 2; B_isolate MPXV_USA_2022_MI0005	197205	OQ320457	MPXV_OQ320457	Virus_dsDNA_env; Poxviridae; Chordopoxvirinae; Orthopoxvirus; MPXV; 2; B	Monkeypox virus	Linear	OQ320457 USA 2022	West Af	3	2	N America	USA	USA: MI	B	Human	MPXV_USA_2022_MI0005	2022	Homo sapiens	OQ320457
OQ320458	Wed Jun 26 18:51:23 CDT 2024	MPXV; 2; B_isolate MPXV_USA_2022_MO0002	197166	OQ320458	MPXV_OQ320458	Virus_dsDNA_env; Poxviridae; Chordopoxvirinae; Orthopoxvirus; MPXV; 2; B	Monkeypox virus	Linear	OQ320458 USA 2022	West Af	3	2	N America	USA	USA: MO	B	Human	MPXV_USA_2022_MO0002	2022	Homo sapiens	OQ320458
OQ320459	Wed Jun 26 18:51:23 CDT 2024	MPXV; 2; B_isolate MPXV_USA_2022_MT0001	197165	OQ320459	MPXV_OQ320459	Virus_dsDNA_env; Poxviridae; Chordopoxvirinae; Orthopoxvirus; MPXV; 2; B	Monkeypox virus	Linear	OQ320459 USA 2022	West Af	3	2	N America	USA	USA: MT	B	Human	MPXV_USA_2022_MT0001	2022	Homo sapiens	OQ320459
OQ320460	Wed Jun 26 18:51:23 CDT 2024	MPXV; 2; B_isolate MPXV_USA_2022_MT0002	197153	OQ320460	MPXV_OQ320460	Virus_dsDNA_env; Poxviridae; Chordopoxvirinae; Orthopoxvirus; MPXV; 2; B	Monkeypox virus	Linear	OQ320460 USA 2022	West Af	3	2	N America	USA	USA: MT	B	Human	MPXV_USA_2022_MT0002	2022	Homo sapiens	OQ320460
OQ320461	Wed Jun 26 18:51:23 CDT 2024	MPXV; 2; B_isolate MPXV_USA_2022_NV0004	197168	OQ320461	MPXV_OQ320461	Virus_dsDNA_env; Poxviridae; Chordopoxvirinae; Orthopoxvirus; MPXV; 2; B	Monkeypox virus	Linear	OQ320461 USA 2022	West Af	3	2	N America	USA	USA: NV	B	Human	MPXV_USA_2022_NV0004	2022	Homo sapiens	OQ320461
OQ320462	Wed Jun 26 18:51:23 CDT 2024	MPXV; 2; B_isolate MPXV_USA_2022_NY0019	197175	OQ320462	MPXV_OQ320462	Virus_dsDNA_env; Poxviridae; Chordopoxvirinae; Orthopoxvirus; MPXV; 2; B	Monkeypox virus	Linear	OQ320462 USA 2022	West Af	3	2	N America	USA	USA: NY	B	Human	MPXV_USA_2022_NY0019	2022	Homo sapiens	OQ320462
OQ320463	Wed Jun 26 18:51:23 CDT 2024	MPXV; 2; B_isolate MPXV_USA_2022_NY0024	197158	OQ320463	MPXV_OQ320463	Virus_dsDNA_env; Poxviridae; Chordopoxvirinae; Orthopoxvirus; MPXV; 2; B	Monkeypox virus	Linear	OQ320463 USA 2022	West Af	3	2	N America	USA	USA: NY	B	Human	MPXV_USA_2022_NY0024	2022	Homo sapiens	OQ320463
OQ320464	Wed Jun 26 18:51:23 CDT 2024	MPXV; 2; B_isolate MPXV_USA_2022_NY0025	197161	OQ320464	MPXV_OQ320464	Virus_dsDNA_env; Poxviridae; Chordopoxvirinae; Orthopoxvirus; MPXV; 2; B	Monkeypox virus	Linear	OQ320464 USA 2022	West Af	3	2	N America	USA	USA: NY	B	Human	MPXV_USA_2022_NY0025	2022	Homo sapiens	OQ320464
OQ320465	Wed Jun 26 18:51:23 CDT 2024	MPXV; 2; B_isolate MPXV_USA_2022_NY0026	197183	OQ320465	MPXV_OQ320465	Virus_dsDNA_env; Poxviridae; Chordopoxvirinae; Orthopoxvirus; MPXV; 2; B	Monkeypox virus	Linear	OQ320465 USA 2022	West Af	3	2	N America	USA	USA: NY	B	Human	MPXV_USA_2022_NY0026	2022	Homo sapiens	OQ320465
OQ320466	Wed Jun 26 18:51:23 CDT 2024	MPXV; 2; B_isolate MPXV_USA_2022_NY0036	197147	OQ320466	MPXV_OQ320466	Virus_dsDNA_env; Poxviridae; Chordopoxvirinae; Orthopoxvirus; MPXV; 2; B	Monkeypox virus	Linear	OQ320466 USA 2022	West Af	3	2	N America	USA	USA: NY	B	Human	MPXV_USA_2022_NY0036	2022	Homo sapiens	OQ320466
OQ320467	Wed Jun 26 18:51:23 CDT 2024	MPXV; 2; B_isolate MPXV_USA_2022_NY0037	197154	OQ320467	MPXV_OQ320467	Virus_dsDNA_env; Poxviridae; Chordopoxvirinae; Orthopoxvirus; MPXV; 2; B	Monkeypox virus	Linear	OQ320467 USA 2022	West Af	3	2	N America	USA	USA: NY	B	Human	MPXV_USA_2022_NY0037	2022	Homo sapiens	OQ320467
OQ320468	Wed Jun 26 18:51:23 CDT 2024	MPXV; 2; B_isolate MPXV_USA_2022_TN0014	197224	OQ320468	MPXV_OQ320468	Virus_dsDNA_env; Poxviridae; Chordopoxvirinae; Orthopoxvirus; MPXV; 2; B	Monkeypox virus	Linear	OQ320468 USA 2022	West Af	3	2	N America	USA	USA: TN	B	Human	MPXV_USA_2022_TN0014	2022	Homo sapiens	OQ320468
OQ320469	Wed Jun 26 18:51:23 CDT 2024	MPXV; 2; B_isolate MPXV_USA_2022_TX0036	197138	OQ320469	MPXV_OQ320469	Virus_dsDNA_env; Poxviridae; Chordopoxvirinae; Orthopoxvirus; MPXV; 2; B	Monkeypox virus	Linear	OQ320469 USA 2022	West Af	3	2	N America	USA	USA: TX	B	Human	MPXV_USA_2022_TX0036	2022	Homo sapiens	OQ320469
OQ320503	Wed Jun 26 18:51:23 CDT 2024	MPXV; 2; B_isolate MPXV_USA_2022_NC0013	197158	OQ320503	MPXV_OQ320503	Virus_dsDNA_env; Poxviridae; Chordopoxvirinae; Orthopoxvirus; MPXV; 2; B	Monkeypox virus	Linear	OQ320503 USA 2022	West Af	3	2	N America	USA	USA: NC	B	Human	MPXV_USA_2022_NC0013	2022	Homo sapiens	OQ320503
OQ320504	Wed Jun 26 18:51:23 CDT 2024	MPXV; 2; B_isolate MPXV_USA_2022_NC0014	197179	OQ320504	MPXV_OQ320504	Virus_dsDNA_env; Poxviridae; Chordopoxvirinae; Orthopoxvirus; MPXV; 2; B	Monkeypox virus	Linear	OQ320504 USA 2022	West Af	3	2	N America	USA	USA: NC	B	Human	MPXV_USA_2022_NC0014	2022	Homo sapiens	OQ320504
OQ320505	Wed Jun 26 18:51:23 CDT 2024	MPXV; 2; B_isolate MPXV_USA_2022_TN0011	197167	OQ320505	MPXV_OQ320505	Virus_dsDNA_env; Poxviridae; Chordopoxvirinae; Orthopoxvirus; MPXV; 2; B	Monkeypox virus	Linear	OQ320505 USA 2022	West Af	3	2	N America	USA	USA: TN	B	Human	MPXV_USA_2022_TN0011	2022	Homo sapiens	OQ320505
OQ320506	Wed Jun 26 18:51:23 CDT 2024	MPXV; 2; B_isolate MPXV_USA_2022_TN0012	197169	OQ320506	MPXV_OQ320506	Virus_dsDNA_env; Poxviridae; Chordopoxvirinae; Orthopoxvirus; MPXV; 2; B	Monkeypox virus	Linear	OQ320506 USA 2022	West Af	3	2	N America	USA	USA: TN	B	Human	MPXV_USA_2022_TN0012	2022	Homo sapiens	OQ320506
OQ320507	Wed Jun 26 18:51:23 CDT 2024	MPXV; 2; B_isolate MPXV_USA_2022_TN0013	197162	OQ320507	MPXV_OQ320507	Virus_dsDNA_env; Poxviridae; Chordopoxvirinae; Orthopoxvirus; MPXV; 2; B	Monkeypox virus	Linear	OQ320507 USA 2022	West Af	3	2	N America	USA	USA: TN	B	Human	MPXV_USA_2022_TN0013	2022	Homo sapiens	OQ320507
OQ320508	Wed Jun 26 18:51:23 CDT 2024	MPXV; 2; B_isolate MPXV_USA_2022_TX0032	197165	OQ320508	MPXV_OQ320508	Virus_dsDNA_env; Poxviridae; Chordopoxvirinae; Orthopoxvirus; MPXV; 2; B	Monkeypox virus	Linear	OQ320508 USA 2022	West Af	3	2	N America	USA	USA: TX	B	Human	MPXV_USA_2022_TX0032	2022	Homo sapiens	OQ320508
OQ320509	Wed Jun 26 18:51:23 CDT 2024	MPXV; 2; B_isolate MPXV_USA_2022_WA0016	197173	OQ320509	MPXV_OQ320509	Virus_dsDNA_env; Poxviridae; Chordopoxvirinae; Orthopoxvirus; MPXV; 2; B	Monkeypox virus	Linear	OQ320509 USA 2022	West Af	3	2	N America	USA	USA: WA	B	Human	MPXV_USA_2022_WA0016	2022	Homo sapiens	OQ320509
OQ320510	Wed Jun 26 18:51:23 CDT 2024	MPXV; 2; B_isolate MPXV_USA_2022_AZ0008	197159	OQ320510	MPXV_OQ320510	Virus_dsDNA_env; Poxviridae; Chordopoxvirinae; Orthopoxvirus; MPXV; 2; B	Monkeypox virus	Linear	OQ320510 USA 2022	West Af	3	2	N America	USA	USA: AZ	B	Human	MPXV_USA_2022_AZ0008	2022	Homo sapiens	OQ320510
OQ320511	Wed Jun 26 18:51:23 CDT 2024	MPXV; 2; B_isolate MPXV_USA_2022_CA0012	197169	OQ320511	MPXV_OQ320511	Virus_dsDNA_env; Poxviridae; Chordopoxvirinae; Orthopoxvirus; MPXV; 2; B	Monkeypox virus	Linear	OQ320511 USA 2022	West Af	3	2	N America	USA	USA: CA	B	Human	MPXV_USA_2022_CA0012	2022	Homo sapiens	OQ320511
OQ320512	Wed Jun 26 18:51:23 CDT 2024	MPXV; 2; B_isolate MPXV_USA_2022_DC0015	197153	OQ320512	MPXV_OQ320512	Virus_dsDNA_env; Poxviridae; Chordopoxvirinae; Orthopoxvirus; MPXV; 2; B	Monkeypox virus	Linear	OQ320512 USA 2022	West Af	3	2	N America	USA	USA: DC	B	Human	MPXV_USA_2022_DC0015	2022	Homo sapiens	OQ320512
OQ320513	Wed Jun 26 18:51:23 CDT 2024	MPXV; 2; B_isolate MPXV_USA_2022_FL0009	197133	OQ320513	MPXV_OQ320513	Virus_dsDNA_env; Poxviridae; Chordopoxvirinae; Orthopoxvirus; MPXV; 2; B	Monkeypox virus	Linear	OQ320513 USA 2022	West Af	3	2	N America	USA	USA: FL	B	Human	MPXV_USA_2022_FL0009	2022	Homo sapiens	OQ320513
OQ320514	Wed Jun 26 18:51:23 CDT 2024	MPXV; 2; B_isolate MPXV_USA_2022_GA0021	197163	OQ320514	MPXV_OQ320514	Virus_dsDNA_env; Poxviridae; Chordopoxvirinae; Orthopoxvirus; MPXV; 2; B	Monkeypox virus	Linear	OQ320514 USA 2022	West Af	3	2	N America	USA	USA: GA	B	Human	MPXV_USA_2022_GA0021	2022	Homo sapiens	OQ320514
OQ320515	Wed Jun 26 18:51:23 CDT 2024	MPXV; 2; B_isolate MPXV_USA_2022_GA0022	197165	OQ320515	MPXV_OQ320515	Virus_dsDNA_env; Poxviridae; Chordopoxvirinae; Orthopoxvirus; MPXV; 2; B	Monkeypox virus	Linear	OQ320515 USA 2022	West Af	3	2	N America	USA	USA: GA	B	Human	MPXV_USA_2022_GA0022	2022	Homo sapiens	OQ320515
OQ320516	Wed Jun 26 18:51:23 CDT 2024	MPXV; 2; B_isolate MPXV_USA_2022_GA0023	197172	OQ320516	MPXV_OQ320516	Virus_dsDNA_env; Poxviridae; Chordopoxvirinae; Orthopoxvirus; MPXV; 2; B	Monkeypox virus	Linear	OQ320516 USA 2022	West Af	3	2	N America	USA	USA: GA	B	Human	MPXV_USA_2022_GA0023	2022	Homo sapiens	OQ320516
OQ320517	Wed Jun 26 18:51:23 CDT 2024	MPXV; 2; B_isolate MPXV_USA_2022_GA0024	197130	OQ320517	MPXV_OQ320517	Virus_dsDNA_env; Poxviridae; Chordopoxvirinae; Orthopoxvirus; MPXV; 2; B	Monkeypox virus	Linear	OQ320517 USA 2022	West Af	3	2	N America	USA	USA: GA	B	Human	MPXV_USA_2022_GA0024	2022	Homo sapiens	OQ320517
OQ320518	Wed Jun 26 18:51:23 CDT 2024	MPXV; 2; B_isolate MPXV_USA_2022_IN0006	197179	OQ320518	MPXV_OQ320518	Virus_dsDNA_env; Poxviridae; Chordopoxvirinae; Orthopoxvirus; MPXV; 2; B	Monkeypox virus	Linear	OQ320518 USA 2022	West Af	3	2	N America	USA	USA: IN	B	Human	MPXV_USA_2022_IN0006	2022	Homo sapiens	OQ320518
OQ320519	Wed Jun 26 18:51:23 CDT 2024	MPXV; 2; B_isolate MPXV_USA_2022_LA0003	197200	OQ320519	MPXV_OQ320519	Virus_dsDNA_env; Poxviridae; Chordopoxvirinae; Orthopoxvirus; MPXV; 2; B	Monkeypox virus	Linear	OQ320519 USA 2022	West Af	3	2	N America	USA	USA: LA	B	Human	MPXV_USA_2022_LA0003	2022	Homo sapiens	OQ320519
OQ320520	Wed Jun 26 18:51:23 CDT 2024	MPXV; 2; B_isolate MPXV_USA_2022_MN0008	197158	OQ320520	MPXV_OQ320520	Virus_dsDNA_env; Poxviridae; Chordopoxvirinae; Orthopoxvirus; MPXV; 2; B	Monkeypox virus	Linear	OQ320520 USA 2022	West Af	3	2	N America	USA	USA: MN	B	Human	MPXV_USA_2022_MN0008	2022	Homo sapiens	OQ320520
OQ320521	Wed Jun 26 18:51:23 CDT 2024	MPXV; 2; B_isolate MPXV_USA_2022_MN0009	197169	OQ320521	MPXV_OQ320521	Virus_dsDNA_env; Poxviridae; Chordopoxvirinae; Orthopoxvirus; MPXV; 2; B	Monkeypox virus	Linear	OQ320521 USA 2022	West Af	3	2	N America	USA	USA: MN	B	Human	MPXV_USA_2022_MN0009	2022	Homo sapiens	OQ320521
OQ320522	Wed Jun 26 18:51:23 CDT 2024	MPXV; 2; B_isolate MPXV_USA_2022_MN0010	197174	OQ320522	MPXV_OQ320522	Virus_dsDNA_env; Poxviridae; Chordopoxvirinae; Orthopoxvirus; MPXV; 2; B	Monkeypox virus	Linear	OQ320522 USA 2022	West Af	3	2	N America	USA	USA: MN	B	Human	MPXV_USA_2022_MN0010	2022	Homo sapiens	OQ320522
OQ320523	Wed Jun 26 18:51:23 CDT 2024	MPXV; 2; B_isolate MPXV_USA_2022_TX0034	197144	OQ320523	MPXV_OQ320523	Virus_dsDNA_env; Poxviridae; Chordopoxvirinae; Orthopoxvirus; MPXV; 2; B	Monkeypox virus	Linear	OQ320523 USA 2022	West Af	3	2	N America	USA	USA: TX	B	Human	MPXV_USA_2022_TX0034	2022	Homo sapiens	OQ320523
OQ419002	Wed Jun 26 18:51:23 CDT 2024	MPXV; 2; B_isolate NY-NYCPHL-000097	195654	OQ419002	MPXV_OQ419002	Virus_dsDNA_env; Poxviridae; Chordopoxvirinae; Orthopoxvirus; MPXV; 2; B	Monkeypox virus	Linear	OQ419002 USA 2022	West Af	3	2	N America	USA	USA: NY	B	Human	NY-NYCPHL-000097	2022	Homo sapiens	OQ419002
OQ419003	Wed Jun 26 18:51:23 CDT 2024	MPXV; 2; B_isolate NY-NYCPHL-000157	195636	OQ419003	MPXV_OQ419003	Virus_dsDNA_env; Poxviridae; Chordopoxvirinae; Orthopoxvirus; MPXV; 2; B	Monkeypox virus	Linear	OQ419003 USA 2022	West Af	3	2	N America	USA	USA: NY	B	Human	NY-NYCPHL-000157	2022	Homo sapiens	OQ419003
OQ419005	Wed Jun 26 18:51:23 CDT 2024	MPXV; 2; B_isolate NY-NYCPHL-000179	195655	OQ419005	MPXV_OQ419005	Virus_dsDNA_env; Poxviridae; Chordopoxvirinae; Orthopoxvirus; MPXV; 2; B	Monkeypox virus	Linear	OQ419005 USA 2022	West Af	3	2	N America	USA	USA: NY	B	Human	NY-NYCPHL-000179	2022	Homo sapiens	OQ419005
OQ419006	Wed Jun 26 18:51:23 CDT 2024	MPXV; 2; B_isolate NY-NYCPHL-000237	195636	OQ419006	MPXV_OQ419006	Virus_dsDNA_env; Poxviridae; Chordopoxvirinae; Orthopoxvirus; MPXV; 2; B	Monkeypox virus	Linear	OQ419006 USA 2022	West Af	3	2	N America	USA	USA: NY	B	Human	NY-NYCPHL-000237	2022	Homo sapiens	OQ419006
OQ419007	Wed Jun 26 18:51:23 CDT 2024	MPXV; 2; B_isolate NY-NYCPHL-000238	195649	OQ419007	MPXV_OQ419007	Virus_dsDNA_env; Poxviridae; Chordopoxvirinae; Orthopoxvirus; MPXV; 2; B	Monkeypox virus	Linear	OQ419007 USA 2022	West Af	3	2	N America	USA	USA: NY	B	Human	NY-NYCPHL-000238	2022	Homo sapiens	OQ419007
OQ419008	Wed Jun 26 18:51:23 CDT 2024	MPXV; 2; B_isolate NY-NYCPHL-000337	195659	OQ419008	MPXV_OQ419008	Virus_dsDNA_env; Poxviridae; Chordopoxvirinae; Orthopoxvirus; MPXV; 2; B	Monkeypox virus	Linear	OQ419008 USA 2022	West Af	3	2	N America	USA	USA: NY	B	Human	NY-NYCPHL-000337	2022	Homo sapiens	OQ419008
OQ419010	Wed Jun 26 18:51:23 CDT 2024	MPXV; 2; B_isolate NY-NYCPHL-000394	195656	OQ419010	MPXV_OQ419010	Virus_dsDNA_env; Poxviridae; Chordopoxvirinae; Orthopoxvirus; MPXV; 2; B	Monkeypox virus	Linear	OQ419010 USA 2022	West Af	3	2	N America	USA	USA: NY	B	Human	NY-NYCPHL-000394	2022	Homo sapiens	OQ419010
OQ419011	Wed Jun 26 18:51:23 CDT 2024	MPXV; 2; B_isolate NY-NYCPHL-000408	195641	OQ419011	MPXV_OQ419011	Virus_dsDNA_env; Poxviridae; Chordopoxvirinae; Orthopoxvirus; MPXV; 2; B	Monkeypox virus	Linear	OQ419011 USA 2022	West Af	3	2	N America	USA	USA: NY	B	Human	NY-NYCPHL-000408	2022	Homo sapiens	OQ419011
OQ419012	Wed Jun 26 18:51:23 CDT 2024	MPXV; 2; B_isolate NY-NYCPHL-000422	195615	OQ419012	MPXV_OQ419012	Virus_dsDNA_env; Poxviridae; Chordopoxvirinae; Orthopoxvirus; MPXV; 2; B	Monkeypox virus	Linear	OQ419012 USA 2022	West Af	3	2	N America	USA	USA: NY	B	Human	NY-NYCPHL-000422	2022	Homo sapiens	OQ419012
OQ419013	Wed Jun 26 18:51:23 CDT 2024	MPXV; 2; B_isolate NY-NYCPHL-000424	195656	OQ419013	MPXV_OQ419013	Virus_dsDNA_env; Poxviridae; Chordopoxvirinae; Orthopoxvirus; MPXV; 2; B	Monkeypox virus	Linear	OQ419013 USA 2022	West Af	3	2	N America	USA	USA: NY	B	Human	NY-NYCPHL-000424	2022	Homo sapiens	OQ419013
OQ419014	Wed Jun 26 18:51:23 CDT 2024	MPXV; 2; B_isolate NY-NYCPHL-000427	195656	OQ419014	MPXV_OQ419014	Virus_dsDNA_env; Poxviridae; Chordopoxvirinae; Orthopoxvirus; MPXV; 2; B	Monkeypox virus	Linear	OQ419014 USA 2022	West Af	3	2	N America	USA	USA: NY	B	Human	NY-NYCPHL-000427	2022	Homo sapiens	OQ419014
OQ419016	Wed Jun 26 18:51:23 CDT 2024	MPXV; 2; B_isolate NY-NYCPHL-000462	195656	OQ419016	MPXV_OQ419016	Virus_dsDNA_env; Poxviridae; Chordopoxvirinae; Orthopoxvirus; MPXV; 2; B	Monkeypox virus	Linear	OQ419016 USA 2022	West Af	3	2	N America	USA	USA: NY	B	Human	NY-NYCPHL-000462	2022	Homo sapiens	OQ419016
OQ419017	Wed Jun 26 18:51:23 CDT 2024	MPXV; 2; B_isolate NY-NYCPHL-000467	195656	OQ419017	MPXV_OQ419017	Virus_dsDNA_env; Poxviridae; Chordopoxvirinae; Orthopoxvirus; MPXV; 2; B	Monkeypox virus	Linear	OQ419017 USA 2022	West Af	3	2	N America	USA	USA: NY	B	Human	NY-NYCPHL-000467	2022	Homo sapiens	OQ419017
OQ419018	Wed Jun 26 18:51:23 CDT 2024	MPXV; 2; B_isolate NY-NYCPHL-000475	195653	OQ419018	MPXV_OQ419018	Virus_dsDNA_env; Poxviridae; Chordopoxvirinae; Orthopoxvirus; MPXV; 2; B	Monkeypox virus	Linear	OQ419018 USA 2022	West Af	3	2	N America	USA	USA: NY	B	Human	NY-NYCPHL-000475	2022	Homo sapiens	OQ419018
OQ419020	Wed Jun 26 18:51:23 CDT 2024	MPXV; 2; B_isolate NY-NYCPHL-000491	195656	OQ419020	MPXV_OQ419020	Virus_dsDNA_env; Poxviridae; Chordopoxvirinae; Orthopoxvirus; MPXV; 2; B	Monkeypox virus	Linear	OQ419020 USA 2022	West Af	3	2	N America	USA	USA: NY	B	Human	NY-NYCPHL-000491	2022	Homo sapiens	OQ419020
OQ419021	Wed Jun 26 18:51:23 CDT 2024	MPXV; 2; B_isolate NY-NYCPHL-000495	195656	OQ419021	MPXV_OQ419021	Virus_dsDNA_env; Poxviridae; Chordopoxvirinae; Orthopoxvirus; MPXV; 2; B	Monkeypox virus	Linear	OQ419021 USA 2022	West Af	3	2	N America	USA	USA: NY	B	Human	NY-NYCPHL-000495	2022	Homo sapiens	OQ419021
OQ419022	Wed Jun 26 18:51:23 CDT 2024	MPXV; 2; B_isolate NY-NYCPHL-000498	195656	OQ419022	MPXV_OQ419022	Virus_dsDNA_env; Poxviridae; Chordopoxvirinae; Orthopoxvirus; MPXV; 2; B	Monkeypox virus	Linear	OQ419022 USA 2022	West Af	3	2	N America	USA	USA: NY	B	Human	NY-NYCPHL-000498	2022	Homo sapiens	OQ419022
OQ419023	Wed Jun 26 18:51:23 CDT 2024	MPXV; 2; B_isolate NY-NYCPHL-000515	195663	OQ419023	MPXV_OQ419023	Virus_dsDNA_env; Poxviridae; Chordopoxvirinae; Orthopoxvirus; MPXV; 2; B	Monkeypox virus	Linear	OQ419023 USA 2022	West Af	3	2	N America	USA	USA: NY	B	Human	NY-NYCPHL-000515	2022	Homo sapiens	OQ419023
OQ419024	Wed Jun 26 18:51:23 CDT 2024	MPXV; 2; B_isolate NY-NYCPHL-000516	195651	OQ419024	MPXV_OQ419024	Virus_dsDNA_env; Poxviridae; Chordopoxvirinae; Orthopoxvirus; MPXV; 2; B	Monkeypox virus	Linear	OQ419024 USA 2022	West Af	3	2	N America	USA	USA: NY	B	Human	NY-NYCPHL-000516	2022	Homo sapiens	OQ419024
OQ419025	Wed Jun 26 18:51:23 CDT 2024	MPXV; 2; B_isolate NY-NYCPHL-000522	195650	OQ419025	MPXV_OQ419025	Virus_dsDNA_env; Poxviridae; Chordopoxvirinae; Orthopoxvirus; MPXV; 2; B	Monkeypox virus	Linear	OQ419025 USA 2022	West Af	3	2	N America	USA	USA: NY	B	Human	NY-NYCPHL-000522	2022	Homo sapiens	OQ419025
OQ419026	Wed Jun 26 18:51:23 CDT 2024	MPXV; 2; B_isolate NY-NYCPHL-000523	195645	OQ419026	MPXV_OQ419026	Virus_dsDNA_env; Poxviridae; Chordopoxvirinae; Orthopoxvirus; MPXV; 2; B	Monkeypox virus	Linear	OQ419026 USA 2022	West Af	3	2	N America	USA	USA: NY	B	Human	NY-NYCPHL-000523	2022	Homo sapiens	OQ419026
OQ419028	Wed Jun 26 18:51:23 CDT 2024	MPXV; 2; B_isolate NY-NYCPHL-000525	195656	OQ419028	MPXV_OQ419028	Virus_dsDNA_env; Poxviridae; Chordopoxvirinae; Orthopoxvirus; MPXV; 2; B	Monkeypox virus	Linear	OQ419028 USA 2022	West Af	3	2	N America	USA	USA: NY	B	Human	NY-NYCPHL-000525	2022	Homo sapiens	OQ419028
OQ419029	Wed Jun 26 18:51:23 CDT 2024	MPXV; 2; B_isolate NY-NYCPHL-000526	195656	OQ419029	MPXV_OQ419029	Virus_dsDNA_env; Poxviridae; Chordopoxvirinae; Orthopoxvirus; MPXV; 2; B	Monkeypox virus	Linear	OQ419029 USA 2022	West Af	3	2	N America	USA	USA: NY	B	Human	NY-NYCPHL-000526	2022	Homo sapiens	OQ419029
OQ419030	Wed Jun 26 18:51:23 CDT 2024	MPXV; 2; B_isolate NY-NYCPHL-000527	195656	OQ419030	MPXV_OQ419030	Virus_dsDNA_env; Poxviridae; Chordopoxvirinae; Orthopoxvirus; MPXV; 2; B	Monkeypox virus	Linear	OQ419030 USA 2022	West Af	3	2	N America	USA	USA: NY	B	Human	NY-NYCPHL-000527	2022	Homo sapiens	OQ419030
OQ419031	Wed Jun 26 18:51:23 CDT 2024	MPXV; 2; B_isolate NY-NYCPHL-000528	195619	OQ419031	MPXV_OQ419031	Virus_dsDNA_env; Poxviridae; Chordopoxvirinae; Orthopoxvirus; MPXV; 2; B	Monkeypox virus	Linear	OQ419031 USA 2022	West Af	3	2	N America	USA	USA: NY	B	Human	NY-NYCPHL-000528	2022	Homo sapiens	OQ419031
OQ419032	Wed Jun 26 18:51:23 CDT 2024	MPXV; 2; B_isolate NY-NYCPHL-000529	195653	OQ419032	MPXV_OQ419032	Virus_dsDNA_env; Poxviridae; Chordopoxvirinae; Orthopoxvirus; MPXV; 2; B	Monkeypox virus	Linear	OQ419032 USA 2022	West Af	3	2	N America	USA	USA: NY	B	Human	NY-NYCPHL-000529	2022	Homo sapiens	OQ419032
OQ419033	Wed Jun 26 18:51:23 CDT 2024	MPXV; 2; B_isolate NY-NYCPHL-000530	195656	OQ419033	MPXV_OQ419033	Virus_dsDNA_env; Poxviridae; Chordopoxvirinae; Orthopoxvirus; MPXV; 2; B	Monkeypox virus	Linear	OQ419033 USA 2022	West Af	3	2	N America	USA	USA: NY	B	Human	NY-NYCPHL-000530	2022	Homo sapiens	OQ419033
OQ419034	Wed Jun 26 18:51:23 CDT 2024	MPXV; 2; B_isolate NY-NYCPHL-000531	195650	OQ419034	MPXV_OQ419034	Virus_dsDNA_env; Poxviridae; Chordopoxvirinae; Orthopoxvirus; MPXV; 2; B	Monkeypox virus	Linear	OQ419034 USA 2022	West Af	3	2	N America	USA	USA: NY	B	Human	NY-NYCPHL-000531	2022	Homo sapiens	OQ419034
OQ419035	Wed Jun 26 18:51:23 CDT 2024	MPXV; 2; B_isolate NY-NYCPHL-000546	195653	OQ419035	MPXV_OQ419035	Virus_dsDNA_env; Poxviridae; Chordopoxvirinae; Orthopoxvirus; MPXV; 2; B	Monkeypox virus	Linear	OQ419035 USA 2022	West Af	3	2	N America	USA	USA: NY	B	Human	NY-NYCPHL-000546	2022	Homo sapiens	OQ419035
OQ419036	Wed Jun 26 18:51:23 CDT 2024	MPXV; 2; B_isolate NY-NYCPHL-000547	195656	OQ419036	MPXV_OQ419036	Virus_dsDNA_env; Poxviridae; Chordopoxvirinae; Orthopoxvirus; MPXV; 2; B	Monkeypox virus	Linear	OQ419036 USA 2022	West Af	3	2	N America	USA	USA: NY	B	Human	NY-NYCPHL-000547	2022	Homo sapiens	OQ419036
OQ419037	Wed Jun 26 18:51:23 CDT 2024	MPXV; 2; B_isolate NY-NYCPHL-000554	195656	OQ419037	MPXV_OQ419037	Virus_dsDNA_env; Poxviridae; Chordopoxvirinae; Orthopoxvirus; MPXV; 2; B	Monkeypox virus	Linear	OQ419037 USA 2022	West Af	3	2	N America	USA	USA: NY	B	Human	NY-NYCPHL-000554	2022	Homo sapiens	OQ419037
OQ419038	Wed Jun 26 18:51:23 CDT 2024	MPXV; 2; B_isolate NY-NYCPHL-000562	195650	OQ419038	MPXV_OQ419038	Virus_dsDNA_env; Poxviridae; Chordopoxvirinae; Orthopoxvirus; MPXV; 2; B	Monkeypox virus	Linear	OQ419038 USA 2022	West Af	3	2	N America	USA	USA: NY	B	Human	NY-NYCPHL-000562	2022	Homo sapiens	OQ419038
OQ419039	Wed Jun 26 18:51:23 CDT 2024	MPXV; 2; B_isolate NY-NYCPHL-000571	195656	OQ419039	MPXV_OQ419039	Virus_dsDNA_env; Poxviridae; Chordopoxvirinae; Orthopoxvirus; MPXV; 2; B	Monkeypox virus	Linear	OQ419039 USA 2022	West Af	3	2	N America	USA	USA: NY	B	Human	NY-NYCPHL-000571	2022	Homo sapiens	OQ419039
OQ419040	Wed Jun 26 18:51:23 CDT 2024	MPXV; 2; B_isolate NY-NYCPHL-000577	195656	OQ419040	MPXV_OQ419040	Virus_dsDNA_env; Poxviridae; Chordopoxvirinae; Orthopoxvirus; MPXV; 2; B	Monkeypox virus	Linear	OQ419040 USA 2022	West Af	3	2	N America	USA	USA: NY	B	Human	NY-NYCPHL-000577	2022	Homo sapiens	OQ419040
OQ419041	Wed Jun 26 18:51:23 CDT 2024	MPXV; 2; B_isolate NY-NYCPHL-000578	195650	OQ419041	MPXV_OQ419041	Virus_dsDNA_env; Poxviridae; Chordopoxvirinae; Orthopoxvirus; MPXV; 2; B	Monkeypox virus	Linear	OQ419041 USA 2022	West Af	3	2	N America	USA	USA: NY	B	Human	NY-NYCPHL-000578	2022	Homo sapiens	OQ419041
OQ419042	Wed Jun 26 18:51:23 CDT 2024	MPXV; 2; B_isolate NY-NYCPHL-000579	195653	OQ419042	MPXV_OQ419042	Virus_dsDNA_env; Poxviridae; Chordopoxvirinae; Orthopoxvirus; MPXV; 2; B	Monkeypox virus	Linear	OQ419042 USA 2022	West Af	3	2	N America	USA	USA: NY	B	Human	NY-NYCPHL-000579	2022	Homo sapiens	OQ419042
OQ419043	Wed Jun 26 18:51:23 CDT 2024	MPXV; 2; B_isolate NY-NYCPHL-000586	195650	OQ419043	MPXV_OQ419043	Virus_dsDNA_env; Poxviridae; Chordopoxvirinae; Orthopoxvirus; MPXV; 2; B	Monkeypox virus	Linear	OQ419043 USA 2022	West Af	3	2	N America	USA	USA: NY	B	Human	NY-NYCPHL-000586	2022	Homo sapiens	OQ419043
OQ419044	Wed Jun 26 18:51:23 CDT 2024	MPXV; 2; B_isolate NY-NYCPHL-000594	195653	OQ419044	MPXV_OQ419044	Virus_dsDNA_env; Poxviridae; Chordopoxvirinae; Orthopoxvirus; MPXV; 2; B	Monkeypox virus	Linear	OQ419044 USA 2022	West Af	3	2	N America	USA	USA: NY	B	Human	NY-NYCPHL-000594	2022	Homo sapiens	OQ419044
OQ419046	Wed Jun 26 18:51:23 CDT 2024	MPXV; 2; B_isolate NY-NYCPHL-000609	195653	OQ419046	MPXV_OQ419046	Virus_dsDNA_env; Poxviridae; Chordopoxvirinae; Orthopoxvirus; MPXV; 2; B	Monkeypox virus	Linear	OQ419046 USA 2022	West Af	3	2	N America	USA	USA: NY	B	Human	NY-NYCPHL-000609	2022	Homo sapiens	OQ419046
OQ419047	Wed Jun 26 18:51:23 CDT 2024	MPXV; 2; B_isolate NY-NYCPHL-000612	195629	OQ419047	MPXV_OQ419047	Virus_dsDNA_env; Poxviridae; Chordopoxvirinae; Orthopoxvirus; MPXV; 2; B	Monkeypox virus	Linear	OQ419047 USA 2022	West Af	3	2	N America	USA	USA: NY	B	Human	NY-NYCPHL-000612	2022	Homo sapiens	OQ419047
OQ419048	Wed Jun 26 18:51:23 CDT 2024	MPXV; 2; B_isolate NY-NYCPHL-000613	195656	OQ419048	MPXV_OQ419048	Virus_dsDNA_env; Poxviridae; Chordopoxvirinae; Orthopoxvirus; MPXV; 2; B	Monkeypox virus	Linear	OQ419048 USA 2022	West Af	3	2	N America	USA	USA: NY	B	Human	NY-NYCPHL-000613	2022	Homo sapiens	OQ419048
OQ419049	Wed Jun 26 18:51:23 CDT 2024	MPXV; 2; B_isolate NY-NYCPHL-000625	195656	OQ419049	MPXV_OQ419049	Virus_dsDNA_env; Poxviridae; Chordopoxvirinae; Orthopoxvirus; MPXV; 2; B	Monkeypox virus	Linear	OQ419049 USA 2022	West Af	3	2	N America	USA	USA: NY	B	Human	NY-NYCPHL-000625	2022	Homo sapiens	OQ419049
OQ419050	Wed Jun 26 18:51:23 CDT 2024	MPXV; 2; B_isolate NY-NYCPHL-000632	195656	OQ419050	MPXV_OQ419050	Virus_dsDNA_env; Poxviridae; Chordopoxvirinae; Orthopoxvirus; MPXV; 2; B	Monkeypox virus	Linear	OQ419050 USA 2022	West Af	3	2	N America	USA	USA: NY	B	Human	NY-NYCPHL-000632	2022	Homo sapiens	OQ419050
OQ419051	Wed Jun 26 18:51:23 CDT 2024	MPXV; 2; B_isolate NY-NYCPHL-000634	195648	OQ419051	MPXV_OQ419051	Virus_dsDNA_env; Poxviridae; Chordopoxvirinae; Orthopoxvirus; MPXV; 2; B	Monkeypox virus	Linear	OQ419051 USA 2022	West Af	3	2	N America	USA	USA: NY	B	Human	NY-NYCPHL-000634	2022	Homo sapiens	OQ419051
OQ419052	Wed Jun 26 18:51:23 CDT 2024	MPXV; 2; B_isolate NY-NYCPHL-000648	195643	OQ419052	MPXV_OQ419052	Virus_dsDNA_env; Poxviridae; Chordopoxvirinae; Orthopoxvirus; MPXV; 2; B	Monkeypox virus	Linear	OQ419052 USA 2022	West Af	3	2	N America	USA	USA: NY	B	Human	NY-NYCPHL-000648	2022	Homo sapiens	OQ419052
OQ419053	Wed Jun 26 18:51:23 CDT 2024	MPXV; 2; B_isolate NY-NYCPHL-000656	195659	OQ419053	MPXV_OQ419053	Virus_dsDNA_env; Poxviridae; Chordopoxvirinae; Orthopoxvirus; MPXV; 2; B	Monkeypox virus	Linear	OQ419053 USA 2022	West Af	3	2	N America	USA	USA: NY	B	Human	NY-NYCPHL-000656	2022	Homo sapiens	OQ419053
OQ419054	Wed Jun 26 18:51:23 CDT 2024	MPXV; 2; B_isolate NY-NYCPHL-000659	195656	OQ419054	MPXV_OQ419054	Virus_dsDNA_env; Poxviridae; Chordopoxvirinae; Orthopoxvirus; MPXV; 2; B	Monkeypox virus	Linear	OQ419054 USA 2022	West Af	3	2	N America	USA	USA: NY	B	Human	NY-NYCPHL-000659	2022	Homo sapiens	OQ419054
OQ419055	Wed Jun 26 18:51:23 CDT 2024	MPXV; 2; B_isolate NY-NYCPHL-000661	195650	OQ419055	MPXV_OQ419055	Virus_dsDNA_env; Poxviridae; Chordopoxvirinae; Orthopoxvirus; MPXV; 2; B	Monkeypox virus	Linear	OQ419055 USA 2022	West Af	3	2	N America	USA	USA: NY	B	Human	NY-NYCPHL-000661	2022	Homo sapiens	OQ419055
[truncated: 625 more rows]
