# Supplementary material for: Monkeypox Virus and Vaccinia Vaccines: Genomic and Antigenic Differences Relevant to Outbreaks and Vaccinology
Source: Preprints.org preprint supplement (doi:10.20944/preprints202410.2082.v1), 2024-10-28
Supplement: Supplementary file 4 [file supplementary]

Table S3. Summary of hits and structures found for MPXV (NC\_003310) antigenic proteins

| MPXV<br>virion | MPXV<br>protein | Structures<br>found (n) | Available<br>structures | Chain | Rank | E-value            | % Match identity   | % Coverage         |
|----------------|-----------------|-------------------------|-------------------------|-------|------|--------------------|--------------------|--------------------|
| MV             | A29             | 1                       | <b>3VOP</b>             | C     | 1    | <b>3.13752E-20</b> | <b>90.69767442</b> | <b>38.73873874</b> |
| MV             | E8              | 1309                    | 4E9O                    | X     | 1    | 1.2234E-158        | 93.13304721        | 75.40983607        |
|                |                 |                         | 4ETQ                    | X     | 2    | 2.5556E-156        | 91.4893617         | 74.75409836        |
|                |                 |                         | <b>5USH</b>             | X     | 3    | <b>1.7373E-158</b> | <b>92.73504274</b> | <b>75.40983607</b> |
|                |                 |                         | 4ETQ                    | C     | 4    | 2.8765E-153        | 90.98712446        | 73.7704918         |
|                |                 |                         | 5USH                    | A     | 5    | 1.201E-152         | 90.94827586        | 73.1147541         |
|                |                 |                         | 5USL                    | X     | 6    | 1.5539E-155        | 92.24137931        | 74.42622951        |
|                |                 |                         | 6B9J                    | X     | 7    | 2.0503E-155        | 91.45299145        | 74.42622951        |
|                |                 |                         | 5USL                    | A     | 8    | 9.871E-155         | 91.81034483        | 74.09836066        |
|                |                 |                         | 6KLZ                    | A     | 9    | 2.22323E-36        | 37.33333333        | 69.83606557        |
|                |                 |                         | 6KM2                    | A     | 10   | 2.22323E-36        | 37.33333333        | 69.83606557        |
| MV             | H3              | 1                       | <b>5EJO</b>             | A     | 1    | <b>1.6013E-142</b> | <b>84.38818565</b> | <b>65.23076923</b> |
| MV             | M1              | 6                       | 1YPY                    | A     | 1    | 1.093E-131         | 98.9010989         | 72.50996016        |
|                |                 |                         | 1YPY                    | B     | 2    | 3.0146E-121        | 99.4047619         | 66.93227092        |
|                |                 |                         | <b>2I9L</b>             | I     | 3    | <b>4.5356E-125</b> | <b>99.42196532</b> | <b>68.92430279</b> |
|                |                 |                         | 4U6H                    | J     | 4    | 2.2423E-121        | 99.4047619         | 66.93227092        |
|                |                 |                         | 4U6H                    | E     | 5    | 5.7892E-120        | 99.39759036        | 66.13545817        |
|                |                 |                         | 6CJ6                    | B     | 6    | 1.67502E-08        | 26.31578947        | 57.37051793        |
| EV             | A35             | 7                       | 4M1G                    | A     | 1    | 2.77992E-48        | 87.80487805        | 43.40659341        |
|                |                 |                         | 3K7B                    | B     | 2    | 4.00405E-50        | 88.23529412        | 45.05494505        |
|                |                 |                         | 3K7B                    | A     | 3    | 3.96318E-48        | 87.95180723        | 43.95604396        |
|                |                 |                         | 4M1G                    | B     | 4    | 1.08783E-44        | 82.92682927        | 41.20879121        |
|                |                 |                         | <b>4LU5</b>             | A     | 5    | <b>1.13535E-50</b> | <b>90.36144578</b> | <b>45.05494505</b> |
|                |                 |                         | 4LU5                    | B     | 6    | 9.92339E-50        | 89.15662651        | 44.50549451        |
|                |                 |                         | 4LQF                    | A     | 7    | 9.12281E-44        | 81.70731707        | 40.65934066        |
| EV             | B6              | 36                      | <b>5FOB</b>             | C     | 1    | <b>1.00571E-11</b> | <b>29.58333333</b> | <b>67.9245283</b>  |
|                |                 |                         | 6V06                    | A     | 2    | 1.35695E-07        | 33.05785124        | 34.90566038        |
|                |                 |                         | 6XSD                    | A     | 3    | 1.35695E-07        | 33.05785124        | 34.90566038        |
|                |                 |                         | 6V08                    | A     | 4    | 1.46339E-07        | 33.05785124        | 34.90566038        |
|                |                 |                         | 2UWN                    | A     | 5    | 5.34893E-08        | 28.05755396        | 39.93710692        |
|                |                 |                         | 7JIK                    | A     | 6    | 1.39262E-07        | 33.05785124        | 34.90566038        |
|                |                 |                         | 1QUB                    | A     | 7    | 1.36882E-07        | 33.05785124        | 34.90566038        |
|                |                 |                         | 2V8E                    | A     | 8    | 1.47132E-07        | 28.05755396        | 39.93710692        |
|                |                 |                         | 1C1Z                    | A     | 9    | 1.33245E-07        | 33.05785124        | 34.90566038        |
|                |                 |                         | 4AYI                    | E     | 10   | 2.204E-07          | 31.95876289        | 28.30188679        |

Table S3. Summary of hits and structures found for MPXV (NC\_003310) antigenic proteins

---

**Description**

---

**STRUCTURE OF VACCINIA VIRUS A27**

VACCINIA D8L ECTODOMAIN STRUCTURE

VACCINIA VIRUS D8L IMV ENVELOPE PROTEIN IN COMPLEX WITH FAB OF MURINE IGG2A LA5

**STRUCTURE OF VACCINIA VIRUS D8 PROTEIN BOUND TO HUMAN FAB VV66**

VACCINIA VIRUS D8L IMV ENVELOPE PROTEIN IN COMPLEX WITH FAB OF MURINE IGG2A LA5

STRUCTURE OF VACCINIA VIRUS D8 PROTEIN BOUND TO HUMAN FAB VV66

STRUCTURE OF VACCINIA VIRUS D8 PROTEIN BOUND TO HUMAN FAB VV304

STRUCTURE OF VACCINIA VIRUS D8 PROTEIN BOUND TO HUMAN FAB VV138

STRUCTURE OF VACCINIA VIRUS D8 PROTEIN BOUND TO HUMAN FAB VV304

HUMAN CARBONIC ANHYDRASE II V143I VARIANT 00 ATM CO2

HUMAN CARBONIC ANHYDRASE II V143I VARIANT 15 ATM CO2

**VACCINIA VIRUS H3 ENV PROT; TARGET OF NEUT AB, EXHIBITS GLYCOSYLTRANSFERASE FOLD & BINDS UDP-GLUCOSE**

CRYSTAL STRUCTURE OF VACCINIA VIRUS L1 PROTEIN

CRYSTAL STRUCTURE OF VACCINIA VIRUS L1 PROTEIN

**STRUCTURE OF FAB 7D11 FROM A NEUTRALIZING ANTIBODY AGAINST THE POXVIRUS L1 PROTEIN**

VACCINIA L1/M12B9-FAB COMPLEX

VACCINIA L1/M12B9-FAB COMPLEX

STRUCTURE OF THE POXVIRUS PROTEIN F9

STRUCTURE OF MURINE IGG2A A27D7-FAB IN COMPLEX WITH VACCINIA ANTIGEN A33R AT THE RESOLUTION OF 1.6 ANG.

THE STRUCTURE OF THE POXVIRUS A33 PROTEIN REVEALS A DIMER OF UNIQUE C- TYPE LECTIN-LIKE DOMAINS.

THE STRUCTURE OF THE POXVIRUS A33 PROTEIN REVEALS A DIMER OF UNIQUE C- TYPE LECTIN-LIKE DOMAINS.

STRUCTURE OF MURINE IGG2A A27D7-FAB IN COMPLEX WITH VACCINIA ANTIGEN A33R AT THE RESOLUTION OF 1.6 ANG.

**STRUCTURE OF MURINE IGG2A A20G2-FAB IN COMPLEX WITH VACCINIA ANTIGEN A33R AT RESOLUTION OF 2.9 ANG.**

STRUCTURE OF MURINE IGG2A A20G2-FAB IN COMPLEX WITH VACCINIA ANTIGEN A33R AT THE RESOLUTION OF 2.9 ANG.

STRUCTURE OF MURINE IGG2B A2C7-FAB IN COMPLEX WITH VACCINIA ANTIGEN A33R AT THE RESOLUTION OF 2.3 ANG.

**CRYSTAL STRUCTURE OF HUMAN COMPLEMENT C3B IN COMPLEX WITH SMALLPOX INHIBITOR OF COMPLEMENT (SPICE)**

CRYSTAL STRUCTURE OF BETA-2 GLYCOPROTEIN I PURIFIED FROM PLASMA (PB2GPI)

PATIENT-DERIVED B2GPI

CRYSTAL STRUCTURE OF HUMAN RECOMBINANT BETA-2 GLYCOPROTEIN I (HRB2GPI)

CRYSTAL STRUCTURE OF HUMAN COMPLEMENT FACTOR H, SCR DOMAINS 6-8 (H402 RISK VARIANT).

HUMAN RECOMBINANT BETA-2-GLYCOPROTEIN 1

CRYSTAL STRUCTURE OF THE GLYCOSYLATED FIVE-DOMAIN HUMAN BETA2- GLYCOPROTEIN I.

CRYSTAL STRUCTURE OF HUMAN COMPLEMENT FACTOR H, SCR DOMAINS 6-8 (H402 RISK VARIANT).

CRYSTAL STRUCTURE OF HUMAN BETA-2-GLYCOPROTEIN-I (APOLIPOPROTEIN-H)

STRUCTURE OF A COMPLEX BETWEEN CCPS 6 AND 7 OF HUMAN COMPLEMENT FACTOR H.

---
