# Supplementary material for: Monkeypox Virus and Vaccinia Vaccines: Genomic and Antigenic Differences Relevant to Outbreaks and Vaccinology
Source: Preprints.org preprint supplement (doi:10.20944/preprints202410.2082.v1), 2024-10-28
Supplement: Supplementary file 5 [file supplementary]

A

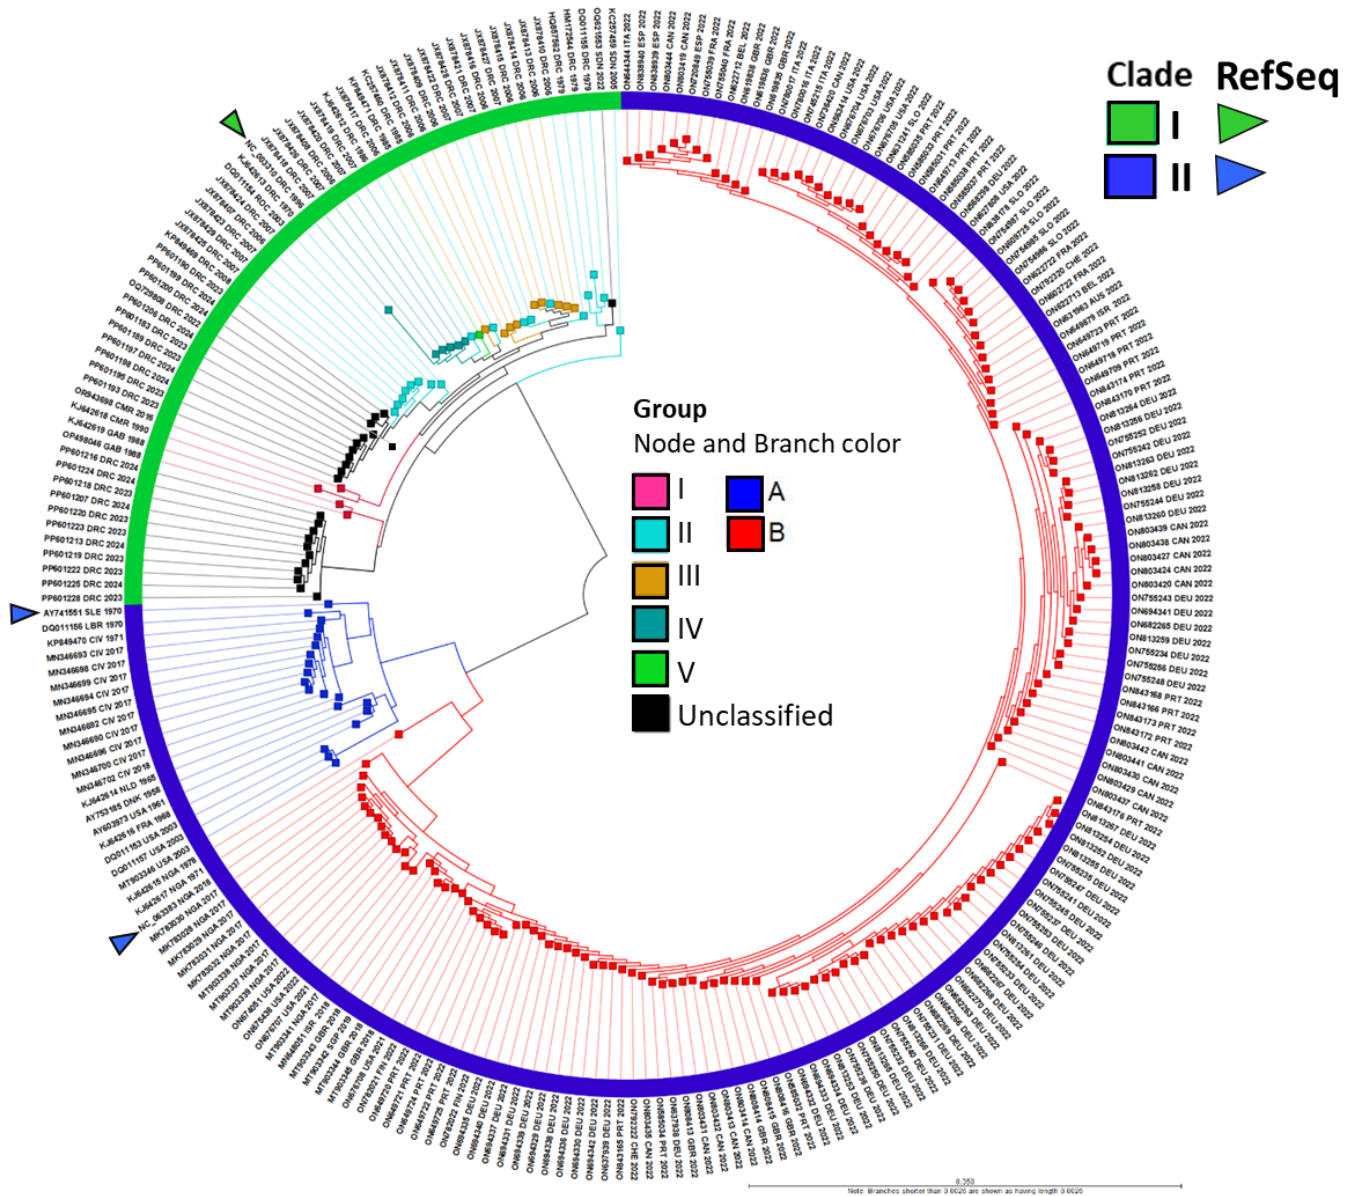

Note: Branches shorter than 0.0025 are shown as having length 0.0025

B

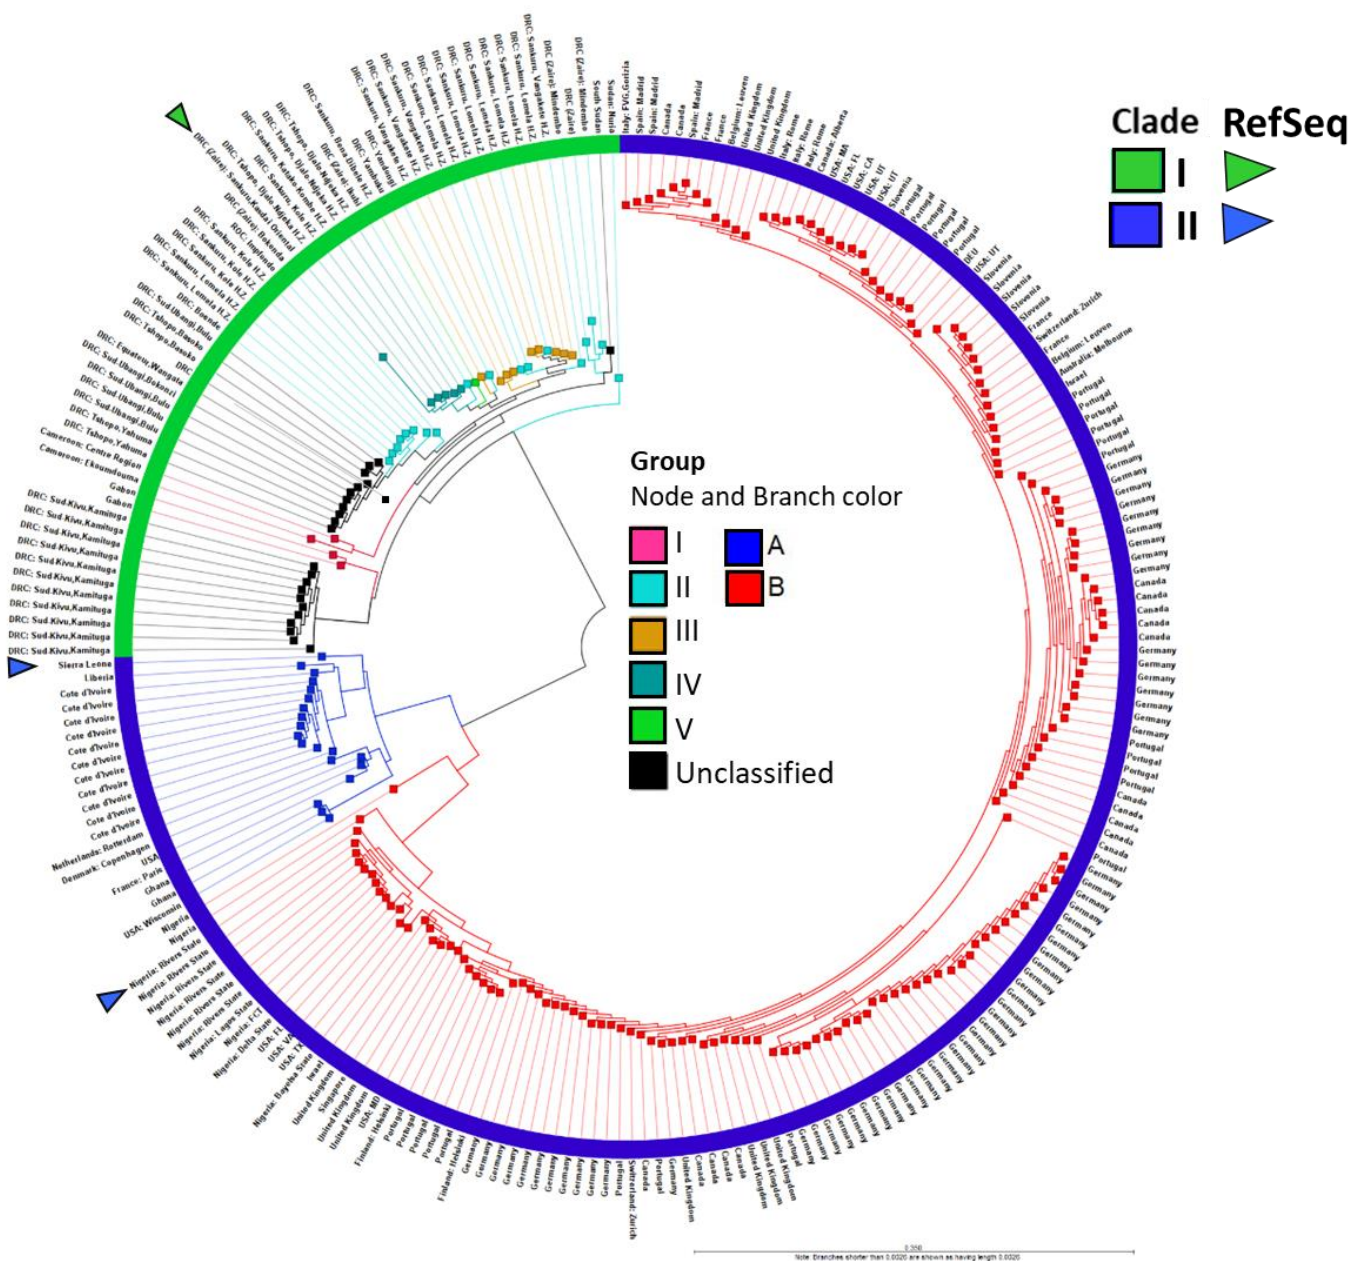

**Supplementary Figure S1.** Enlarged phylograms of Figures 4A and 4B to enhance visualization. Refer to the Figure 4 legend for details.
